# Supplementary material for: Cell elongation is regulated through a central circuit of interacting transcription factors in the Arabidopsis hypocotyl
Source: eLife. 2014 May 27;3:e03031. doi: 10.7554/eLife.03031 (PMC4075450; doi:10.7554/eLife.03031)
Supplement: Figure 1—source data 1. — (A) ARF6 target genes. ChIP-Seq analysis R (CSAR) software was used to identify binding peaks, with parameters (backg = 10, norm = −1, test = 'Ratio', times = 1e6, digits = 2) (Muino et al., 2011). Binding peaks with FDR <0.01 were finally defined as the ARF6 binding peak and genes having at least one ARF6 binding peak within its promoter (−3 kb) or coding region or 1 kb downstream from stop codon were considered direct target genes. max: maximum peak value; u3000, u2000, u1000: upstream 3000, 2000, or 1000 bp from transcription start site; d0: coding region; d1000: downstream 1000 bp from stop codon. (B) BZR1 target genes. ChIP-Seq experiment was performed using the BZR1p::BZR1-CFP transgenic seedlings grown in the dark for 5 days, and anti-YFP antibody. Data were analyzed as described in legend of Figure 1—source data 1A. (C) Previous PIF4 ChIP-seq result (Oh et al., 2012) was re-analyzed with same statistical method as described in Figure 1—source data 1A, to define PIF4 target genes. DOI: http://dx.doi.org/10.7554/eLife.03031.004 [file elife03031s001.xlsx]

## Sheet: A
Figure 1-source data 1A. ARF6 target genes. ChIP-Seq analysis R (CSAR) software was used to identify binding peaks, with parameters (backg=10, norm=-1, test="Ratio", times=1e6, digits=2) (Muino et al., 2011). Binding peaks with FDR < 0.01 were finally defined as the ARF6 binding peak and genes having at least one ARF6 binding peak within its promoter (-3 kb) or coding region or 1kb downstream fro…
Gene	max3kb1kb	u3000	u2000	u1000	d0	d1000
AT2G23170	33.86	11.28	0	33.86	0	0
AT2G23171	33.86	11.28	0	0	33.86	0
AT1G23080	22.68	0	0	0	22.68	0
AT3G15540	21.9	0	9.04	21.9	0	0
AT4G37390	20.56	2.9	4.35	20.56	0	0
AT3G23020	19.81	19.81	2.56	2.56	0	2.45
AT3G23030	19.81	5.02	7.93	19.81	2.56	2.56
AT5G57670	19.55	0	0	0	0	19.55
AT3G60400	17.13	9.81	0	17.13	0	0
AT5G03370	17.09	0	17.09	0	0	0
AT4G36170	16.65	0	0	0	16.65	0
AT4G36180	16.65	0	0	0	0	16.65
AT1G67900	16.2	0	0	16.2	2.45	0
AT4G17453	15.75	0	0	0	15.75	0
AT4G17460	15.75	0	15.75	0	0	0
AT5G66580	15.64	0	0	15.64	0	10.16
AT5G66590	15.64	0	15.64	10.16	0	3.01
AT3G19390	15.42	15.42	0	0	0	0
AT2G44650	15.3	15.3	0	0	0	0
AT2G44660	15.3	0	0	15.3	0	0
AT2G44670	15.3	0	15.3	0	0	0
AT2G01440	15.19	0	0	2.45	0	15.19
AT4G34760	14.86	0	0	14.86	0	0
AT5G47370	14.41	0	14.41	0	0	0
AT1G13240	14.3	3.57	14.3	3.79	0	0
AT1G31875	13.52	13.52	0	0	0	0
AT1G31880	13.52	0	0	13.52	0	0
AT1G69570	13.52	0	0	13.52	0	0
AT5G47635	13.07	0	0	13.07	0	0
AT5G47640	13.07	0	0	13.07	0	0
AT2G46260	12.85	0	0	0	0	12.85
AT2G46270	12.85	0	12.85	2.56	0	0
AT3G12920	12.85	0	0	12.85	0	0
AT2G35880	12.51	0	0	12.51	0	0
AT2G35890	12.51	0	0	0	0	12.51
AT1G02660	12.17	0	0	12.17	0	3.01
AT1G02670	12.17	0	0	12.17	0	0
AT2G04870	12.17	0	12.17	0	0	0
AT2G04880	12.17	0	0	12.17	0	0
AT4G29090	12.06	12.06	0	2.56	0	0
AT4G12110	11.95	0	0	0	11.95	0
AT4G12115	11.95	0	0	11.95	0	0
AT4G12120	11.95	0	0	0	0	11.95
AT1G75490	11.84	0	0	11.84	0	3.01
AT5G44260	11.78	0	0	0	2.67	11.78
AT3G14370	11.73	4.01	11.73	3.45	0	0
AT5G65670	11.28	3.34	3.57	11.28	0	0
AT3G63430	11.17	0	0	0	0	11.17
AT3G63440	11.17	0	11.17	2.34	0	0
AT3G63445	11.17	0	0	0	11.17	0
AT1G21990	11.06	0	0	0	0	11.06
AT1G28440	11.06	0	0	0	0	11.06
AT1G28450	11.06	11.06	0	0	0	0
AT1G54210	11.06	0	11.06	0	0	0
AT3G23040	11.06	0	8.26	0	11.06	2.67
AT3G50790	11.06	0	11.06	0	0	0
AT3G50800	11.06	0	0	11.06	0	0
AT2G28360	10.83	0	0	0	0	10.83
AT1G78100	10.72	5.36	3.9	10.72	3.45	0
AT2G35360	10.72	0	0	0	0	10.72
AT2G35370	10.72	10.72	0	0	0	0
AT4G14560	10.72	0	0	10.72	0	0
AT4G14570	10.72	0	10.72	0	0	0
AT5G37240	10.72	0	0	10.72	0	0
AT4G36860	10.61	0	10.61	0	0	0
AT1G18400	10.5	0	0	5.91	10.5	2.34
AT2G45670	10.5	9.71	10.5	0	0	4.91
AT2G45680	10.5	0	4.46	2.56	9.71	10.5
AT2G45685	10.5	0	0	10.5	2.56	4.46
AT3G53420	10.5	0	10.5	0	2.67	3.12
AT2G26710	10.39	0	0	3.57	10.39	0
AT2G26720	10.39	10.39	0	0	0	0
AT1G14910	10.27	10.27	0	0	0	0
AT2G46970	10.27	0	10.27	0	0	0
AT2G46980	10.27	0	0	0	0	10.27
AT4G39403	10.27	0	2.34	10.27	0	0
AT4G39404	10.27	0	0	2.34	10.27	0
AT1G04240	10.16	0	4.57	10.16	0	0
AT1G49780	10.16	10.16	0	0	0	0
AT5G66600	10.16	0	0	0	0	10.16
AT5G60850	10.05	0	10.05	3.23	0	6.36
AT1G70940	9.94	0	0	4.91	9.94	2.34
AT2G18090	9.94	0	0	9.94	0	0
AT2G40790	9.94	9.94	0	0	0	0
AT2G40800	9.94	0	0	9.94	0	0
AT2G40805	9.94	9.94	0	0	0	0
AT2G44920	9.94	6.92	0	9.94	0	0
AT1G36050	9.85	0	0	0	9.85	0
AT2G23770	9.83	0	0	0	0	9.83
AT5G02760	9.71	9.71	6.36	6.7	0	0
AT3G20820	9.6	0	0	9.6	0	3.79
AT3G25715	9.6	0	7.14	9.6	0	2.78
AT3G25716	9.6	4.91	0	7.14	9.6	4.35
AT5G52900	9.49	0	0	9.49	2.45	0
AT5G52901	9.49	0	2.45	0	9.49	0
AT5G51550	9.44	9.44	0	2.67	0	0
AT5G51560	9.44	9.44	0	0	0	0
AT1G27290	9.38	0	0	9.38	0	0
AT1G27300	9.38	0	9.38	0	0	0
AT5G57040	9.38	0	9.38	0	0	0
AT5G57050	9.38	0	0	9.38	0	0
AT1G12570	9.27	0	9.27	0	0	0
AT1G12580	9.27	0	0	9.27	0	0
AT1G79110	9.27	0	0	0	4.24	9.27
AT3G05890	9.27	0	9.27	0	0	0
AT3G05905	9.27	0	9.27	3.45	6.03	0
AT5G23280	9.27	0	0	9.27	0	0
AT2G23690	9.04	0	0	9.04	3.23	0
AT5G54510	9.04	0	9.04	0	0	0
AT5G67411	9.04	9.04	0	0	0	0
AT5G25290	8.84	2.94	8.84	0	0	0
AT5G25300	8.84	8.84	0	0	0	0
AT3G04720	8.82	0	8.82	0	0	0
AT3G04721	8.82	0	8.82	0	0	0
AT3G04730	8.82	0	7.03	7.26	0	8.82
AT3G13800	8.82	0	0	0	0	8.82
AT3G13810	8.82	8.82	0	0	0	0
AT5G21940	8.82	0	8.82	5.02	3.12	0
AT5G22940	8.82	0	0	0	8.82	0
AT5G22950	8.82	8.82	0	3.57	0	0
AT5G43700	8.6	0	0	8.6	0	3.57
AT1G75790	8.49	8.49	0	3.01	0	0
AT1G75800	8.49	0	3.01	0	8.49	3.34
AT1G75810	8.49	0	8.49	3.34	0	0
AT2G42870	8.49	7.7	8.49	0	2.56	0
AT3G61460	8.49	8.49	4.13	0	0	0
AT3G61470	8.49	0	8.49	0	0	0
AT5G58610	8.49	3.34	0	8.49	0	0
AT5G58620	8.49	0	8.49	3.34	0	0
AT1G05840	8.37	8.37	0	0	0	2.34
AT1G05850	8.37	0	0	8.37	0	0
AT1G05860	8.37	0	0	8.37	0	0
AT1G29490	8.26	0	0	0	0	8.26
AT1G29500	8.26	0	0	8.26	0	2.45
AT1G29510	8.26	0	8.26	2.45	0	0
AT1G29520	8.26	8.26	2.45	0	0	0
AT3G14205	8.26	8.26	0	0	0	0
AT5G10990	8.26	0	0	0	0	8.26
AT5G11000	8.26	0	0	0	0	8.26
AT2G33310	8.15	3.45	0	0	8.15	0
AT2G46572	8.15	8.15	0	0	0	0
AT2G46580	8.15	0	4.01	8.15	0	0
AT2G46590	8.15	0	8.15	4.01	0	4.01
AT3G07340	8.15	8.15	0	0	0	0
AT3G07350	8.15	0	8.15	0	0	3.68
AT3G57810	8.15	4.13	0	8.15	0	0
AT1G21970	8.1	8.1	0	0	0	0
AT1G21975	8.1	0	0	0	8.1	3.12
AT1G21980	8.1	8.1	3.12	4.24	0	0
AT2G41420	8.04	3.25	8.04	0	0	0
AT2G41430	8.04	0	0	8.04	3.25	0
AT2G41440	8.04	8.04	0	3.25	0	0
AT3G61826	8.04	0	0	2.9	8.04	0
AT3G61827	8.04	0	0	2.9	0	8.04
AT3G61829	8.04	0	0	0	2.9	8.04
AT3G61830	8.04	0	8.04	2.9	0	0
AT5G47380	8.04	0	0	0	0	8.04
AT5G59020	8.04	0	0	0	0	8.04
AT1G15750	7.93	3.57	0	7.93	0	0
AT1G21590	7.93	0	7.93	0	0	0
AT1G21600	7.93	0	0	0	7.93	0
AT1G21610	7.93	7.93	0	0	0	0
AT4G08949	7.93	5.02	3.79	0	0	7.93
AT4G08950	7.93	0	7.93	0	3.79	5.02
AT5G41400	7.93	0	7.93	0	0	0
AT5G41401	7.93	0	2.45	0	7.93	0
AT5G51790	7.93	0	7.93	0	0	0
AT4G16500	7.82	0	0	7.82	0	0
AT4G16510	7.82	0	0	7.82	0	0
AT1G74440	7.81	0	7.81	0	0	0
AT1G74448	7.81	0	0	0	7.81	0
AT1G74450	7.81	0	0	7.81	0	0
AT5G56240	7.81	0	0	7.81	0	0
AT2G34150	7.7	7.7	0	0	0	0
AT2G34160	7.7	0	0	7.7	0	0
AT2G34170	7.7	7.7	0	0	0	0
AT2G42425	7.7	0	0	7.7	3.01	0
AT2G42430	7.7	2.56	3.01	7.7	0	0
AT2G42880	7.7	0	0	0	0	7.7
AT3G10760	7.7	0	0	0	0	7.7
AT3G10770	7.7	0	0	0	0	7.7
AT3G29575	7.7	5.02	0	7.7	0	0
AT2G01010	7.61	6.36	5.21	3.84	0	7.61
AT2G01020	7.61	3.84	0	0	7.61	3.34
AT2G01021	7.61	0	0	7.61	0	0
AT1G13245	7.59	0	3.34	7.59	0	3.57
AT2G27050	7.59	0	0	0	0	7.59
AT2G27060	7.59	7.59	0	0	0	0
AT4G38860	7.59	2.34	0	7.59	0	0
AT5G45100	7.59	7.59	0	0	0	0
AT1G15580	7.48	0	0	7.48	0	0
AT1G15590	7.48	0	0	7.48	0	0
AT1G15600	7.48	7.48	0	0	0	0
AT1G49200	7.48	0	0	7.48	0	0
AT3G43430	7.48	0	7.48	0	0	0
AT3G43431	7.48	0	7.48	0	0	0
AT3G57550	7.48	0	4.24	0	0	7.48
AT3G57560	7.48	0	0	0	0	7.48
AT3G57570	7.48	7.48	0	0	0	0
AT3G63120	7.48	0	0	7.48	0	0
AT3G63130	7.48	0	0	7.48	0	0
AT5G01710	7.48	0	7.48	0	0	0
AT5G01712	7.48	0	7.48	0	0	0
AT5G01720	7.48	0	0	0	7.48	0
AT5G65305	7.44	7.44	4.24	3.9	0	6.36
AT2G42440	7.37	0	0	0	0	7.37
AT4G20170	7.37	0	0	0	0	7.37
AT5G18910	7.37	0	0	7.37	0	0
AT5G18920	7.37	0	0	7.37	0	0
AT2G36750	7.26	7.26	0	0	0	0
AT2G36760	7.26	0	0	0	7.26	0
AT2G36770	7.26	0	0	0	0	7.26
AT3G04732	7.26	0	0	7.26	0	7.03
AT3G04740	7.26	7.26	7.03	0	0	0
AT3G13350	7.26	7.26	0	0	0	0
AT3G13360	7.26	0	0	7.26	0	0
AT3G13370	7.26	0	7.26	0	0	0
AT3G54070	7.26	0	7.26	0	0	0
AT3G54080	7.26	0	0	0	7.26	0
AT3G54090	7.26	7.26	0	0	0	0
AT5G13730	7.26	0	2.56	7.26	0	0
AT5G13740	7.26	0	7.26	2.56	0	0
AT5G45730	7.26	0	0	7.26	0	0
AT1G21650	7.16	0	0	0	7.16	0
AT2G46660	7.14	0	0	0	7.14	0
AT3G62097	7.14	0	7.14	0	0	0
AT3G62100	7.14	0	0	7.14	0	0
AT4G27300	7.14	7.14	0	2.34	0	0
AT4G27310	7.14	2.34	3.9	7.14	0	3.6
AT5G22920	7.1	0	0	3.9	0	7.1
AT5G22930	7.1	0	0	0	0	7.1
AT1G67265	7.03	5.8	0	3.9	0	7.03
AT1G72450	7.03	0	0	7.03	0	0
AT1G72460	7.03	7.03	0	0	0	0
AT2G41310	7.03	0	7.03	0	0	5.91
AT3G01470	7.03	0	0	7.03	0	0
AT3G01472	7.03	0	0	7.03	0	0
AT3G04735	7.03	0	0	0	0	7.03
AT3G23635	7.03	7.03	4.13	3.23	0	0
AT3G23637	7.03	0	0	7.03	0	3.23
AT3G23640	7.03	3.23	7.03	0	0	0
AT4G22165	7.03	0	0	0	0	7.03
AT4G22170	7.03	0	0	7.03	0	0
AT4G22180	7.03	7.03	0	0	0	0
AT4G39400	7.03	0	7.03	3.45	0	0
AT5G03140	7.03	7.03	2.56	2.45	0	0
AT5G08139	7.03	0	7.03	5.13	0	0
AT1G20900	6.92	0	6.92	0	0	0
AT1G23710	6.92	0	0	6.92	0	0
AT2G14960	6.92	0	0	6.92	0	0
AT2G28355	6.92	0	6.92	0	0	0
AT2G29654	6.92	6.92	0	0	2.45	0
AT2G29660	6.92	0	2.45	0	6.92	0
AT2G40970	6.92	0	2.45	6.92	0	0
AT2G40980	6.92	6.92	2.45	0	0	0
AT2G44910	6.92	6.92	0	0	0	0
AT1G02060	6.81	0	6.81	0	0	0
AT1G02065	6.81	0	0	6.81	0	0
AT1G21060	6.81	6.81	0	0	0	0
AT1G40104	6.81	0	0	0	6.81	0
AT1G75240	6.81	0	6.81	0	0	0
AT3G17860	6.81	0	2.34	6.81	0	0
AT3G61260	6.81	0	0	6.81	0	0
AT3G61270	6.81	0	6.81	0	0	0
AT4G26690	6.81	2.34	0	6.81	0	0
AT4G26700	6.81	6.81	0	2.34	0	0
AT5G55910	6.81	6.81	0	0	0	0
AT5G55920	6.81	0	0	0	0	6.81
AT5G67385	6.81	0	0	0	0	6.81
AT5G67390	6.81	0	0	0	0	6.81
AT5G17760	6.8	0	6.8	0	0	0
AT5G17770	6.8	0	0	0	6.8	0
AT1G18870	6.7	0	0	0	6.7	0
AT2G45430	6.7	0	6.7	0	0	0
AT3G16240	6.7	0	0	6.7	3.57	3.01
AT3G49350	6.7	6.7	0	0	0	0
AT3G49360	6.7	0	0	0	0	6.7
AT3G62090	6.7	0	0	6.7	0	0
AT5G03760	6.7	0	0	0	6.7	0
AT3G03830	6.58	6.58	0	4.24	0	0
AT3G03845	6.58	0	4.24	0	0	6.58
AT3G03847	6.58	0	0	6.58	0	0
AT3G03850	6.58	4.24	0	6.58	0	0
AT3G03852	6.58	0	6.58	0	0	0
AT3G06580	6.58	0	6.58	0	0	0
AT3G06590	6.58	0	0	0	6.58	0
AT3G13740	6.58	0	0	0	0	6.58
AT4G14130	6.58	0	6.58	0	3.23	3.34
AT4G38840	6.58	2.34	3.79	6.58	0	0
AT4G38850	6.58	0	0	6.58	0	3.79
AT5G06970	6.58	0	0	6.58	0	0
AT5G06980	6.58	0	0	6.58	0	0
AT5G06990	6.58	6.58	0	0	0	0
AT5G54470	6.58	0	0	6.58	0	0
AT5G54480	6.58	0	6.58	0	0	3.45
AT1G07570	6.47	6.47	0	0	0	0
AT1G07580	6.47	0	0	0	0	6.47
AT1G07590	6.47	0	0	0	0	6.47
AT1G20430	6.47	6.47	0	0	0	0
AT1G20440	6.47	0	0	6.47	0	0
AT1G24625	6.47	0	6.47	2.9	0	0
AT1G69252	6.47	0	0	0	0	6.47
AT1G69260	6.47	0	2.34	6.47	0	0
AT2G46820	6.47	0	0	0	0	6.47
AT2G46830	6.47	0	0	6.47	0	0
AT3G12300	6.47	0	0	6.47	0	0
AT3G12320	6.47	0	0	6.47	0	0
AT3G29370	6.47	0	6.47	3.12	0	0
AT4G36120	6.47	0	0	0	0	6.47
AT5G08790	6.47	0	6.47	3.45	0	0
AT5G09210	6.47	0	0	0	0	6.47
AT5G11970	6.47	0	0	6.47	0	0
AT5G11977	6.47	6.47	0	0	0	0
AT5G18070	6.47	0	0	0	0	6.47
AT5G18080	6.47	0	0	6.47	0	0
AT5G18085	6.47	0	0	6.47	0	0
AT5G18090	6.47	0	6.47	0	0	0
AT5G25460	6.47	6.47	0	0	0	0
AT5G60670	6.47	6.47	2.56	0	0	0
AT5G60680	6.47	0	6.47	0	2.9	2.78
AT2G01008	6.36	0	0	6.36	5.21	3.07
AT2G40008	6.36	6.36	0	3.23	0	0
AT4G09890	6.36	0	0	6.36	0	0
AT4G34131	6.36	0	0	6.36	0	0
AT4G34135	6.36	0	0	0	0	6.36
AT5G18230	6.36	0	0	6.36	0	0
AT5G18240	6.36	0	0	0	0	6.36
AT5G18245	6.36	0	0	6.36	0	0
AT5G60860	6.36	6.36	0	0	0	0
AT5G65300	6.36	3.9	0	6.36	0	0
AT1G02210	6.25	0	0	0	0	6.25
AT1G53165	6.25	0	2.34	0	0	6.25
AT1G62981	6.25	0	0	0	0	6.25
AT1G62990	6.25	0	6.25	0	0	0
AT2G03240	6.25	0	0	6.25	0	0
AT2G07793	6.25	0	6.25	0	0	0
AT3G02140	6.25	0	0	6.25	0	2.78
AT3G02570	6.25	0	0	6.25	0	0
AT3G02580	6.25	0	6.25	4.35	0	0
AT3G57040	6.25	0	0	6.25	0	0
AT5G08330	6.25	0	0	6.25	0	0
AT5G08335	6.25	3.45	6.25	0	0	0
AT5G16110	6.25	6.25	0	0	0	0
AT5G16120	6.25	0	0	6.25	0	0
AT5G24470	6.25	0	6.25	0	0	0
AT1G01470	6.14	0	0	6.14	0	0
AT1G01471	6.14	0	0	0	6.14	0
AT1G01480	6.14	6.14	0	0	3.45	0
AT1G01570	6.14	0	0	0	6.14	4.57
AT1G01580	6.14	6.14	4.57	0	0	0
AT1G09570	6.14	0	0	6.14	2.67	0
AT1G09575	6.14	0	0	0	0	6.14
AT1G49500	6.14	0	6.14	2.78	0	3.01
AT1G52750	6.14	0	4.35	6.14	0	0
AT1G52760	6.14	0	6.14	4.35	0	0
AT1G65830	6.14	0	0	6.14	0	0
AT1G65840	6.14	2.78	6.14	0	0	0
AT1G75060	6.14	2.56	6.14	0	0	0
AT1G75070	6.14	0	0	0	0	6.14
AT1G75080	6.14	0	0	6.14	2.56	0
AT1G80490	6.14	0	0	6.14	0	0
AT2G45310	6.14	0	0	6.14	0	0
AT2G45315	6.14	0	0	0	0	6.14
AT4G15250	6.14	0	6.14	0	0	0
AT4G15260	6.14	0	6.14	0	0	0
AT5G01849	6.14	0	0	0	0	6.14
AT5G01850	6.14	0	0	6.14	0	0
AT5G59480	6.14	0	0	6.14	0	0
AT5G59490	6.14	0	0	0	0	6.14
AT3G15200	6.09	0	6.09	0	0	0
AT3G15210	6.09	0	6.09	0	0	5.69
AT1G14860	6.03	0	0	0	0	6.03
AT1G18450	6.03	0	0	0	0	6.03
AT1G18460	6.03	0	0	6.03	0	0
AT1G29290	6.03	0	6.03	0	0	0
AT1G29630	6.03	0	0	0	0	6.03
AT1G30110	6.03	0	0	6.03	0	0
AT2G36830	6.03	0	0	6.03	0	0
AT3G05900	6.03	0	0	6.03	0	3.45
AT3G05910	6.03	0	0	3.23	0	6.03
AT3G41768	6.03	0	5.98	2.74	6.03	4.16
AT3G41979	6.03	2.74	6.03	4.16	0	0
AT4G25480	6.03	6.03	0	2.45	0	3.79
AT4G25490	6.03	0	0	5.69	0	6.03
AT5G07571	6.03	6.03	0	0	0	0
AT5G07580	6.03	0	0	0	6.03	0
AT5G65430	6.03	0	0	6.03	0	0
AT5G65440	6.03	0	0	6.03	0	0
AT3G41761	5.98	0	0	5.98	0	3.13
AT1G10020	5.91	0	0	5.91	0	0
AT1G10030	5.91	0	5.91	0	0	0
AT1G73830	5.91	0	0	2.45	5.91	0
AT2G41312	5.91	0	0	5.91	0	0
AT2G41330	5.91	5.91	0	0	0	0
AT3G56790	5.91	5.91	3.57	0	0	0
AT3G56800	5.91	0	5.91	3.57	0	0
AT3G56810	5.91	0	0	0	5.91	3.57
AT4G33430	5.91	0	0	5.91	0	0
AT4G33440	5.91	0	5.91	0	0	0
AT5G62370	5.91	0	5.91	0	0	0
AT1G68360	5.8	5.8	0	0	0	0
AT2G27830	5.8	0	0	5.8	0	2.78
AT2G27840	5.8	5.8	0	2.78	0	0
AT2G34640	5.8	0	5.8	3.01	0	0
AT2G47060	5.8	0	5.8	0	0	0
AT2G47070	5.8	0	0	5.8	0	0
AT3G60640	5.8	0	0	0	0	5.8
AT3G60647	5.8	0	5.8	0	0	0
AT3G60650	5.8	5.8	0	0	0	0
AT3G61840	5.8	0	0	0	0	5.8
AT3G61850	5.8	0	5.8	0	0	0
AT3G62700	5.8	0	5.8	0	0	0
AT3G62710	5.8	0	0	3.34	0	5.8
AT4G35760	5.8	0	0	5.8	0	0
AT4G35770	5.8	0	0	5.8	0	0
AT5G16023	5.8	0	5.8	0	0	0
AT5G25240	5.8	0	0	5.8	0	0
AT5G25250	5.8	5.8	0	0	0	0
AT5G40470	5.8	0	0	0	0	5.8
AT5G61997	5.8	0	3.45	0	5.8	0
AT5G62000	5.8	0	5.8	3.45	0	0
AT5G65310	5.8	0	5.8	3.34	0	0
AT2G08986	5.78	4.57	5.24	5.02	5.78	0
AT2G45700	5.78	5.78	0	0	0	0
AT2G45710	5.78	0	0	0	0	5.78
AT2G45720	5.78	0	0	5.78	0	0
AT1G02350	5.69	0	2.34	4.68	0	5.69
AT1G02360	5.69	0	0	0	2.67	5.69
AT1G02370	5.69	5.69	0	0	0	0
AT1G09260	5.69	0	5.69	0	0	0
AT1G09270	5.69	5.69	0	0	0	0
AT1G19180	5.69	0	5.69	0	0	0
AT1G19190	5.69	5.69	0	0	0	0
AT1G23390	5.69	0	0	0	5.69	0
AT1G28330	5.69	0	2.56	5.69	3.79	0
AT1G28335	5.69	0	0	5.69	0	0
AT1G68010	5.69	0	0	0	0	5.69
AT1G68020	5.69	0	0	5.69	0	0
AT2G31005	5.69	0	0	0	0	5.69
AT2G31010	5.69	0	0	5.69	0	0
AT2G32940	5.69	0	0	2.45	0	5.69
AT2G33175	5.69	5.69	0	0	0	2.34
AT2G33180	5.69	0	0	5.69	0	0
AT2G33190	5.69	5.69	0	0	0	0
AT2G45200	5.69	0	5.69	0	0	0
AT2G45210	5.69	0	0	5.69	0	0
AT3G08760	5.69	0	5.69	0	0	0
AT3G08762	5.69	0	0	5.69	0	0
AT3G51950	5.69	0	0	5.69	0	2.78
AT3G51970	5.69	5.69	0	0	0	0
AT4G25450	5.69	5.69	0	0	0	0
AT4G25470	5.69	0	3.79	5.69	0	0
AT4G25500	5.69	0	3.57	5.69	0	0
AT4G30360	5.69	0	5.69	0	0	0
AT4G30370	5.69	0	0	5.69	0	0
AT4G30380	5.69	0	0	5.69	0	0
AT4G31380	5.69	0	0	0	0	5.69
AT4G31390	5.69	0	5.69	0	0	0
AT4G33990	5.69	3.79	5.69	0	0	0
AT4G34000	5.69	0	0	5.69	0	0
AT5G18000	5.69	5.69	0	0	0	0
AT5G18005	5.69	0	5.69	0	0	0
AT5G18010	5.69	0	0	5.69	0	0
AT5G43130	5.69	5.69	0	0	0	0
AT5G43140	5.69	0	0	0	0	5.69
AT5G43150	5.69	0	5.69	0	0	0
AT1G11960	5.58	0	0	5.58	0	0
AT1G11970	5.58	0	0	0	5.58	0
AT1G11980	5.58	0	5.58	0	0	0
AT1G61900	5.58	0	0	0	0	5.58
AT2G18780	5.58	0	5.58	0	0	0
AT2G18790	5.58	0	0	5.58	0	0
AT2G21195	5.58	0	0	0	0	5.58
AT2G21200	5.58	0	3.12	5.58	0	0
AT2G21210	5.58	0	0	3.12	0	5.58
AT2G24545	5.58	0	5.58	0	3.68	0
AT2G24550	5.58	0	0	5.58	0	3.68
AT2G24560	5.58	5.58	0	0	0	0
AT2G41820	5.58	4.13	5.58	0	0	0
AT2G45040	5.58	0	0	0	2.45	5.58
AT2G45960	5.58	0	4.01	4.13	2.63	5.58
AT2G45970	5.58	0	0	0	5.58	2.63
AT3G44190	5.58	5.58	0	0	0	0
AT3G44200	5.58	0	0	5.58	0	0
AT3G54500	5.58	0	5.58	2.9	0	0
AT3G54510	5.58	0	2.9	5.58	0	0
AT4G25270	5.58	5.58	0	0	0	3.45
AT4G25280	5.58	0	0	5.58	0	0
AT4G25290	5.58	0	0	0	0	5.58
AT4G28230	5.58	0	5.58	3.41	0	0
AT4G28240	5.58	0	0	5.58	3.41	0
AT5G02190	5.58	0	0	0	0	5.58
AT5G02200	5.58	0	0	5.58	0	0
AT5G09430	5.58	0	0	0	0	5.58
AT5G09440	5.58	5.58	0	0	0	0
AT5G11530	5.58	0	0	5.58	0	0
AT5G67300	5.58	3.01	3.57	5.58	4.68	0
AT1G06070	5.47	0	0	5.47	0	0
AT2G20370	5.47	0	0	5.47	0	0
AT2G41870	5.47	0	0	5.47	0	0
AT2G41880	5.47	0	5.47	0	0	0
AT3G06500	5.47	0	0	5.47	0	0
AT3G18070	5.47	0	0	0	0	5.47
AT3G18080	5.47	0	0	5.47	0	0
AT3G57790	5.47	5.47	0	0	0	0
AT3G57800	5.47	4.13	0	0	5.47	0
AT4G01120	5.47	0	0	5.47	0	0
AT4G01130	5.47	0	2.45	5.47	0	0
AT4G17160	5.47	5.47	0	0	0	0
AT4G17170	5.47	0	0	0	5.47	0
AT4G17180	5.47	0	0	5.47	0	0
AT4G22190	5.47	5.47	0	0	0	0
AT5G04770	5.47	2.34	2.45	0	3.9	5.47
AT5G04780	5.47	2.78	5.47	0	0	0
AT5G09810	5.47	5.47	0	4.13	0	0
AT5G14900	5.47	2.45	5.47	0	0	0
AT5G14910	5.47	0	0	0	0	5.47
AT5G14920	5.47	0	0	5.47	2.56	0
AT5G47820	5.47	0	5.47	0	0	0
AT5G58630	5.47	5.47	0	0	0	0
AT5G58640	5.47	0	0	0	0	5.47
AT5G58650	5.47	0	0	5.47	0	0
AT5G58660	5.47	0	5.47	0	0	0
AT1G01540	5.39	0	0	2.56	2.78	5.39
AT1G01550	5.39	0	2.78	5.39	0	0
AT1G01560	5.39	5.39	0	0	0	0
AT1G73530	5.39	0	5.39	0	0	0
AT1G73540	5.39	0	0	5.39	0	0
AT1G73550	5.39	0	0	0	0	5.39
AT5G66310	5.38	0	5.38	0	0	0
AT1G01710	5.36	0	0	0	0	5.36
AT1G01720	5.36	0	0	5.36	0	0
AT1G01730	5.36	5.36	0	0	0	0
AT1G10060	5.36	0	0	0	0	5.36
AT1G10070	5.36	0	0	5.36	2.56	3.12
AT1G11120	5.36	0	0	0	5.36	0
AT1G11420	5.36	5.36	0	0	0	0
AT1G11430	5.36	0	0	0	0	5.36
AT1G11440	5.36	0	0	5.36	0	0
AT1G23050	5.36	0	5.24	0	0	5.36
AT1G30690	5.36	0	0	5.36	0	0
AT1G30825	5.36	0	5.36	0	0	0
AT1G53170	5.36	0	0	0	0	5.36
AT1G70944	5.36	0	5.36	0	0	0
AT1G70950	5.36	5.36	0	0	0	0
AT1G73750	5.36	0	0	0	0	5.36
AT1G73760	5.36	0	0	0	5.36	0
AT1G73770	5.36	5.36	0	0	0	0
AT2G10606	5.36	5.36	0	0	0	0
AT2G10608	5.36	0	0	0	0	5.36
AT2G16586	5.36	0	0	0	5.36	0
AT2G18060	5.36	0	0	0	0	5.36
AT2G23067	5.36	5.36	0	0	0	0
AT3G23050	5.36	0	0	0	5.36	3.01
AT4G03010	5.36	0	0	5.36	0	0
AT4G25630	5.36	3.12	0	5.36	0	0
AT4G25631	5.36	5.36	0	0	0	0
AT4G32272	5.36	3.79	5.36	2.9	0	0
AT4G32280	5.36	5.36	0	3.79	0	0
AT5G02530	5.36	0	0	5.36	0	0
AT5G02540	5.36	5.36	0	0	0	0
AT5G07920	5.36	0	0	5.36	0	0
AT5G07930	5.36	0	5.36	0	0	0
AT5G18050	5.36	0	0	5.36	0	0
AT5G18060	5.36	0	0	5.36	0	0
AT5G47530	5.32	0	0	0	0	5.32
AT5G47540	5.32	0	2.53	0	5.32	0
AT3G19680	5.3	0	0	2.45	5.3	4.91
AT3G19690	5.3	0	0	0	4.91	5.3
AT3G19700	5.3	0	5.3	0	0	0
AT3G11410	5.27	0	0	5.27	0	0
AT1G07650	5.24	0	0	0	5.24	0
AT1G08490	5.24	3.68	0	5.24	0	0
AT1G08500	5.24	0	0	5.24	0	0
AT1G22330	5.24	0	3.01	0	5.24	0
AT1G22880	5.24	0	0	0	0	5.24
AT1G22882	5.24	0	0	5.24	0	0
AT1G23040	5.24	0	0	0	0	5.24
AT1G30330	5.24	5.24	3.52	0	2.88	2.9
AT1G73840	5.24	0	0	0	0	5.24
AT1G78260	5.24	0	0	0	5.24	2.45
AT1G78265	5.24	0	0	5.24	0	0
AT1G78270	5.24	0	0	0	2.45	5.24
AT1G78280	5.24	5.24	2.45	0	0	0
AT2G01830	5.24	0	0	0	5.24	0
AT2G07981	5.24	0	0	0	5.24	0
AT2G28540	5.24	0	0	0	0	5.24
AT2G45820	5.24	4.06	0	5.24	0	0
AT2G45830	5.24	0	5.24	4.46	4.06	0
AT3G15520	5.24	0	0	5.24	0	0
AT3G15530	5.24	0	0	0	0	5.24
AT3G20830	5.24	0	5.24	0	3.79	0
AT4G36770	5.24	3.9	0	5.24	0	0
AT4G36780	5.24	0	0	3.9	0	5.24
AT4G39080	5.24	3.23	0	2.56	0	5.24
AT4G39090	5.24	4.57	0	3.09	3.45	5.24
AT4G39800	5.24	0	0	5.24	0	0
AT5G06390	5.24	0	0	5.24	0	0
AT5G08075	5.24	0	0	5.24	0	0
AT5G08080	5.24	0	0	5.24	0	0
AT5G18015	5.24	5.24	0	5.02	0	0
AT5G18020	5.24	0	5.24	5.02	0	0
AT5G18030	5.24	0	5.02	5.24	0	0
AT5G51460	5.24	0	0	5.24	0	0
AT1G06400	5.13	0	5.13	0	0	0
AT1G06410	5.13	0	5.13	0	0	0
AT1G14720	5.13	5.13	0	0	0	0
AT1G14730	5.13	5.13	0	0	0	0
AT1G19350	5.13	0	3.01	0	5.13	0
AT1G20780	5.13	0	0	4.35	0	5.13
AT1G20790	5.13	0	0	0	5.13	0
AT1G20880	5.13	5.13	0	0	0	0
AT1G20890	5.13	0	0	5.13	0	0
AT1G53700	5.13	5.13	0	0	0	0
AT1G62480	5.13	5.13	0	0	0	0
AT2G02070	5.13	0	0	0	0	5.13
AT2G07689	5.13	3.34	3.12	5.13	0	3.75
AT2G07795	5.13	5.13	0	2.78	3.45	0
AT3G18700	5.13	5.13	0	0	0	0
AT3G18710	5.13	0	0	5.13	0	0
AT3G27960	5.13	0	5.13	0	0	0
AT3G59060	5.13	0	0	5.13	4.57	3.12
AT3G63003	5.13	5.13	3.23	0	0	0
AT3G63006	5.13	5.13	3.23	0	0	0
AT3G63010	5.13	0	5.13	2.32	0	0
AT4G23860	5.13	0	0	0	0	5.13
AT4G23870	5.13	0	5.13	0	0	0
AT5G19140	5.13	0	0	5.13	0	0
AT5G19150	5.13	0	2.34	0	0	5.13
AT5G27030	5.13	0	0	5.13	0	0
AT5G28300	5.13	0	5.13	0	0	0
AT5G54590	5.13	5.13	0	0	0	0
AT1G78080	5.07	0	0	0	5.07	0
AT1G01490	5.02	2.67	5.02	4.91	0	0
AT1G01500	5.02	4.91	5.02	2.67	0	0
AT1G22767	5.02	0	0	0	0	5.02
AT1G22770	5.02	0	5.02	0	0	0
AT1G26916	5.02	0	5.02	0	0	0
AT1G69770	5.02	5.02	4.57	0	0	0
AT1G69780	5.02	5.02	0	0	0	0
AT1G75540	5.02	5.02	0	0	0	2.34
AT2G28405	5.02	0	0	0	0	5.02
AT2G32150	5.02	0	2.78	0	5.02	0
AT2G32160	5.02	0	5.02	0	0	0
AT2G42890	5.02	0	0	0	0	5.02
AT2G42900	5.02	0	0	0	5.02	0
AT2G42910	5.02	0	0	5.02	0	0
AT3G11700	5.02	0	0	5.02	0	0
AT3G48050	5.02	0	0	5.02	0	0
AT3G48057	5.02	5.02	0	0	0	0
AT3G49810	5.02	0	5.02	2.56	0	0
AT3G49820	5.02	5.02	0	0	0	0
AT3G50050	5.02	5.02	0	0	0	0
AT3G50060	5.02	0	3.57	5.02	0	0
AT4G14750	5.02	5.02	0	0	0	0
AT4G23820	5.02	0	0	0	5.02	0
AT4G23840	5.02	0	5.02	0	0	0
AT4G25570	5.02	0	0	5.02	0	0
AT4G25580	5.02	0	0	5.02	0	0
AT4G32020	5.02	0	5.02	2.34	3.01	4.46
AT4G38810	5.02	5.02	0	0	0	0
AT4G38820	5.02	0	0	0	0	5.02
AT4G38825	5.02	0	0	5.02	0	0
AT4G38830	5.02	0	5.02	0	0	0
AT5G11950	5.02	0	0	4.24	0	5.02
AT4G14480	4.98	4.98	0	0	0	0
AT4G14490	4.98	0	0	4.98	0	0
AT4G14500	4.98	0	0	4.98	0	0
AT4G14504	4.98	4.98	0	0	0	0
AT4G23620	4.93	0	0	4.93	0	0
AT4G23630	4.93	0	0	0	4.93	0
AT4G23635	4.93	4.93	0	0	0	0
AT1G06840	4.91	0	4.91	0	0	0
AT1G06850	4.91	0	0	4.91	0	0
AT1G32920	4.91	0	0	4.91	0	0
AT1G68825	4.91	0	0	2.34	4.91	0
AT1G70700	4.91	0	0	0	0	4.91
AT2G03890	4.91	0	0	0	0	4.91
AT2G36810	4.91	0	0	4.91	0	0
AT2G36815	4.91	0	4.91	0	0	0
AT3G04670	4.91	0	0	4.91	0	0
AT3G04680	4.91	0	0	0	0	4.91
AT3G25717	4.91	0	0	4.91	0	2.9
AT3G54990	4.91	4.91	0	0	0	0
AT3G55000	4.91	4.91	0	0	0	0
AT3G56270	4.91	0	0	0	0	4.91
AT4G36530	4.91	0	4.91	3.45	0	0
AT4G36540	4.91	0	0	4.91	0	0
AT5G60840	4.91	4.91	0	0	0	0
AT5G63320	4.91	0	0	4.91	0	0
AT5G63340	4.91	0	0	0	4.91	0
AT5G63350	4.91	3.01	0	0	0	4.91
AT5G65470	4.91	0	0	4.91	0	0
AT4G05612	4.84	0	0	0	4.84	0
AT1G01430	4.8	0	0	4.8	0	0
AT1G01440	4.8	0	0	0	0	4.8
AT1G09380	4.8	4.8	0	0	0	0
AT1G09390	4.8	0	0	0	4.8	0
AT1G12440	4.8	0	0	4.8	0	0
AT1G12450	4.8	0	4.8	0	0	0
AT1G51570	4.8	4.8	0	0	0	0
AT1G51580	4.8	0	0	0	4.8	0
AT1G51590	4.8	0	0	0	0	4.8
AT1G67590	4.8	0	0	4.8	0	0
AT1G79060	4.8	0	0	2.56	4.8	0
AT1G79075	4.8	4.8	3.01	0	0	0
AT3G20330	4.8	0	4.8	2.67	0	0
AT3G20340	4.8	0	0	4.8	0	0
AT3G20350	4.8	2.67	4.8	0	0	0
AT3G62630	4.8	4.13	0	2.45	0	4.8
AT4G14770	4.8	0	4.8	0	0	0
AT5G06920	4.8	0	0	0	0	4.8
AT5G06930	4.8	0	0	4.8	0	0
AT5G66290	4.8	0	0	4.8	0	0
AT5G66300	4.8	0	0	0	0	4.8
AT1G01305	4.68	0	0	2.9	0	4.68
AT1G01310	4.68	0	2.9	0	4.68	0
AT1G01320	4.68	0	0	0	0	4.68
AT1G01930	4.68	4.68	0	0	0	0
AT1G01940	4.68	0	0	0	0	4.68
AT1G01950	4.68	0	0	4.68	0	0
AT1G02340	4.68	0	4.68	2.34	0	2.67
AT1G02391	4.68	0	4.68	0	0	0
AT1G02400	4.68	0	4.68	0	2.9	0
AT1G16150	4.68	0	0	4.68	0	0
AT1G30560	4.68	0	0	0	0	4.68
AT1G30570	4.68	0	4.68	0	0	0
AT1G33590	4.68	0	0	4.68	0	0
AT1G52825	4.68	4.68	0	0	0	0
AT1G52827	4.68	0	4.68	0	0	0
AT1G52830	4.68	0	0	4.68	0	0
AT1G72160	4.68	0	0	0	0	4.68
AT1G79420	4.68	0	3.12	0	4.68	0
AT1G80280	4.68	0	4.68	2.56	0	0
AT1G80290	4.68	0	2.56	4.68	0	0
AT2G07687	4.68	4.68	4.13	3.57	0	0
AT2G30032	4.68	0	0	0	0	4.68
AT2G30040	4.68	4.68	0	0	0	0
AT2G38120	4.68	0	0	0	0	4.68
AT3G07000	4.68	0	0	4.68	0	0
AT3G07005	4.68	4.68	0	0	0	4.68
AT3G07010	4.68	0	0	0	3.68	4.68
AT3G16850	4.68	0	4.68	0	0	0
AT3G18050	4.68	0	0	0	0	4.68
AT3G18060	4.68	0	0	4.68	0	0
AT3G20640	4.68	0	0	4.68	0	0
AT3G27770	4.68	0	0	4.68	0	0
AT3G27785	4.68	0	0	0	0	4.68
AT3G44610	4.68	0	0	0	4.68	0
AT3G52060	4.68	0	0	0	4.68	0
AT3G52070	4.68	0	0	4.68	0	0
AT3G52072	4.68	0	0	0	0	4.68
AT3G52080	4.68	4.68	0	0	0	0
AT3G58620	4.68	0	4.68	0	0	0
AT3G61050	4.68	0	0	0	0	4.68
AT3G61060	4.68	0	4.68	2.9	2.56	0
AT3G61890	4.68	4.68	0	0	0	0
AT3G62390	4.68	0	0	4.68	0	0
AT3G62400	4.68	0	0	4.68	0	0
AT3G62410	4.68	0	4.68	0	0	0
AT3G62690	4.68	0	0	0	2.9	4.68
AT4G00800	4.68	0	4.68	0	0	0
AT4G00810	4.68	0	0	4.68	0	0
AT4G00820	4.68	0	4.68	0	0	2.56
AT4G03190	4.68	0	0	4.68	0	0
AT4G03200	4.68	0	0	4.68	0	0
AT4G09150	4.68	0	0	0	4.68	0
AT4G09153	4.68	0	4.68	0	0	0
AT4G24960	4.68	0	0	0	4.68	0
AT4G24970	4.68	4.68	0	0	0	0
AT4G29330	4.68	0	0	4.68	0	0
AT4G36710	4.68	0	4.68	0	2.45	0
AT4G39140	4.68	0	4.68	0	0	0
AT4G39150	4.68	0	0	2.66	0	4.68
AT5G01730	4.68	4.68	0	0	0	0
AT5G01734	4.68	0	0	4.68	0	0
AT5G01740	4.68	0	0	4.68	0	0
AT5G08130	4.68	4.68	0	0	0	0
AT5G13180	4.68	4.68	0	0	0	0
AT5G67310	4.68	0	0	0	4.68	0
AT5G67320	4.68	0	4.68	0	0	0
AT1G17620	4.57	0	0	4.57	0	0
AT1G17630	4.57	4.57	0	0	0	0
AT1G19290	4.57	0	0	0	0	4.57
AT1G69270	4.57	0	0	4.57	0	0
AT1G76210	4.57	4.57	0	0	0	0
AT1G76220	4.57	0	0	4.57	0	0
AT1G76952	4.57	4.57	0	0	0	0
AT1G76954	4.57	0	0	0	0	4.57
AT2G07722	4.57	0	0	4.57	0	0
AT2G34720	4.57	0	0	4.57	0	0
AT2G34730	4.57	4.57	0	0	0	0
AT3G59050	4.57	0	0	4.57	0	0
AT3G59052	4.57	0	0	4.57	0	0
AT4G13195	4.57	4.57	0	0	0	0
AT4G18660	4.57	0	0	0	0	4.57
AT4G18670	4.57	0	0	0	2.34	4.57
AT4G19420	4.57	0	0	4.57	0	0
AT4G32410	4.57	0	0	4.57	0	0
AT4G32420	4.57	0	0	0	0	4.57
AT4G32480	4.57	0	3.79	4.57	0	3.01
AT4G39100	4.57	0	0	4.57	2.45	3.09
AT5G10550	4.57	0	0	4.57	2.45	0
AT5G10560	4.57	0	0	0	0	4.57
AT5G37260	4.57	2.56	0	4.57	0	0
AT5G38200	4.57	0	0	0	4.57	0
AT5G52280	4.57	0	0	4.57	0	0
AT1G14690	4.46	4.46	0	0	0	0
AT1G14700	4.46	0	0	4.46	0	0
AT1G21050	4.46	0	0	4.46	0	0
AT1G55870	4.46	0	0	0	0	4.46
AT1G55880	4.46	0	0	0	4.46	0
AT1G55890	4.46	4.46	0	0	0	0
AT1G56140	4.46	0	0	4.46	0	0
AT1G56145	4.46	0	0	0	0	4.46
AT1G56220	4.46	0	0	4.46	2.68	2.53
AT1G57680	4.46	0	0	0	4.46	0
AT1G60190	4.46	0	0	4.46	0	0
AT1G78610	4.46	0	4.46	0	0	0
AT1G78620	4.46	0	0	0	4.46	0
AT1G78630	4.46	4.46	0	0	0	0
AT2G01680	4.46	0	4.46	0	0	2.45
AT2G19820	4.46	4.46	0	0	0	0
AT2G25482	4.46	0	0	4.46	0	0
AT2G25490	4.46	0	2.45	0	0	4.46
AT2G36220	4.46	0	4.46	0	3.34	0
AT2G45690	4.46	0	0	0	0	4.46
AT2G46520	4.46	0	3.23	0	0	4.46
AT3G10985	4.46	0	0	0	4.46	3.12
AT3G10986	4.46	0	0	0	0	4.46
AT4G03550	4.46	0	0	0	0	4.46
AT4G03560	4.46	0	0	4.46	0	0
AT4G16780	4.46	0	4.46	3.9	2.9	2.78
AT4G17550	4.46	0	0	4.46	0	0
AT4G17560	4.46	0	0	4.46	0	0
AT4G22010	4.46	0	0	2.56	4.46	0
AT4G32030	4.46	3.01	4.46	0	3.01	0
AT4G35837	4.46	4.46	0	0	0	0
AT4G35840	4.46	0	0	0	0	4.46
AT4G35850	4.46	0	0	4.46	0	0
AT5G05430	4.46	3.01	4.46	0	0	0
AT5G05435	4.46	0	0	0	0	4.46
AT5G05440	4.46	0	0	4.46	2.45	0
AT5G05480	4.46	0	0	4.46	0	0
AT5G05490	4.46	0	0	0	4.46	0
AT5G11260	4.46	0	0	4.46	0	0
AT5G11270	4.46	0	0	0	0	4.46
AT5G11280	4.46	4.46	0	0	0	0
AT5G14640	4.46	0	0	4.46	0	0
AT5G14650	4.46	0	4.46	0	0	0
AT5G23850	4.46	0	0	0	4.46	0
AT5G62390	4.46	0	0	4.46	0	0
AT5G62400	4.46	0	0	0	4.46	0
AT5G62410	4.46	0	4.46	0	0	0
AT5G63520	4.46	0	4.46	0	0	0
AT5G63530	4.46	4.46	0	0	0	0
AT5G10336	4.38	0	4.38	0	0	0
AT5G10340	4.38	0	0	0	4.38	0
AT1G09350	4.35	0	0	4.35	0	0
AT1G09360	4.35	4.35	0	0	0	0
AT1G12420	4.35	0	2.78	4.35	0	0
AT1G18330	4.35	0	0	4.35	0	0
AT1G18335	4.35	0	0	0	0	4.35
AT1G20030	4.35	0	0	0	4.35	0
AT1G20050	4.35	4.35	0	0	0	0
AT1G20770	4.35	0	0	4.35	0	0
AT1G25230	4.35	0	0	4.35	0	2.9
AT1G25240	4.35	4.35	0	0	0	0
AT1G29420	4.35	0	4.35	2.45	0	0
AT1G29430	4.35	4.13	0	4.35	0	2.45
AT1G64628	4.35	0	0	0	0	4.35
AT1G64630	4.35	0	0	0	0	4.35
AT1G64640	4.35	0	0	4.35	2.34	0
AT1G64650	4.35	2.56	0	0	0	4.35
AT1G67050	4.35	2.34	0	4.35	0	2.78
AT1G71070	4.35	4.35	0	0	0	0
AT1G71080	4.35	0	0	4.35	0	0
AT1G71090	4.35	0	0	4.35	0	0
AT1G71100	4.35	4.35	0	0	0	0
AT1G80440	4.35	2.56	2.9	0	4.35	3.34
AT2G22125	4.35	0	0	4.35	0	0
AT2G39710	4.35	0	0	0	0	4.35
AT2G40610	4.35	0	4.35	3.45	0	0
AT2G45580	4.35	4.35	0	0	0	0
AT2G45590	4.35	0	0	4.35	0	3.57
AT3G11770	4.35	0	0	4.35	0	0
AT3G11773	4.35	2.9	0	0	0	4.35
AT3G13510	4.35	0	0	4.35	0	0
AT3G16820	4.35	0	4.35	0	0	0
AT3G16830	4.35	0	0	4.35	0	0
AT3G26520	4.35	0	0	0	4.35	3.22
AT3G47620	4.35	2.56	0	4.35	0	0
AT3G51135	4.35	4.35	0	0	0	0
AT3G51140	4.35	0	0	0	4.35	0
AT3G51150	4.35	0	4.35	0	0	0
AT3G62660	4.35	2.34	0	0	0	4.35
AT3G62670	4.35	0	0	0	0	4.35
AT4G14900	4.35	0	0	4.35	0	0
AT4G18710	4.35	2.45	0	4.35	0	0
AT4G22785	4.35	0	0	4.35	0	0
AT4G22790	4.35	0	0	0	0	4.35
AT4G30430	4.35	2.34	4.35	0	0	0
AT4G30440	4.35	0	0	0	3.23	4.35
AT4G36370	4.35	0	0	0	4.35	2.34
AT4G36380	4.35	0	0	0	3.9	4.35
AT5G03720	4.35	0	0	4.35	0	0
AT5G03730	4.35	0	2.34	0	0	4.35
AT5G07100	4.35	0	0	0	0	4.35
AT5G07110	4.35	0	0	0	4.35	0
AT5G07120	4.35	0	0	0	0	4.35
AT5G11060	4.35	0	4.24	0	0	4.35
AT5G13300	4.35	0	0	4.35	0	2.45
AT5G13310	4.35	0	0	4.35	0	0
AT5G18860	4.35	2.34	4.35	0	0	0
AT5G24600	4.35	0	4.35	0	0	0
AT5G24870	4.35	0	0	4.35	0	0
AT5G47240	4.35	0	0	4.35	0	0
AT5G64330	4.35	0	0	0	0	4.35
AT5G64340	4.35	0	0	0	4.35	0
AT5G64341	4.35	0	0	0	4.35	0
AT5G64342	4.35	0	0	0	4.35	0
AT5G64343	4.35	0	0	0	4.35	0
AT4G00720	4.26	0	4.26	3.23	0	0
AT4G00730	4.26	0	0	0	2.34	4.26
AT1G09530	4.24	0	0	4.24	0	0
AT1G13260	4.24	2.78	3.01	4.24	2.78	0
AT1G13270	4.24	4.24	2.78	0	0	0
AT1G15950	4.24	0	0	0	4.24	0
AT1G29450	4.24	0	4.24	2.67	0	4.13
AT1G29460	4.24	0	0	4.24	2.34	2.67
AT1G29465	4.24	2.67	2.45	4.24	0	0
AT1G45688	4.24	0	0	0	4.24	0
AT1G69150	4.24	2.34	4.24	0	0	0
AT1G72175	4.24	0	0	0	0	4.24
AT1G72180	4.24	4.24	0	0	0	0
AT1G77980	4.24	0	4.24	0	0	0
AT1G77990	4.24	0	0	0	4.24	0
AT1G78070	4.24	0	0	2.9	0	4.24
AT2G01420	4.24	0	0	0	4.24	0
AT2G18010	4.24	4.24	4.13	0	0	2.9
AT2G18350	4.24	0	0	4.24	0	0
AT2G22240	4.24	0	0	4.24	0	0
AT2G22241	4.24	0	0	0	4.24	0
AT2G22760	4.24	0	4.24	2.78	0	0
AT2G23180	4.24	4.24	0	0	0	0
AT2G23460	4.24	0	0	4.24	0	0
AT2G39480	4.24	0	0	4.24	0	0
AT2G43340	4.24	4.01	0	4.24	0	0
AT2G46220	4.24	0	0	0	0	4.24
AT2G46225	4.24	0	0	4.24	0	0
AT3G03828	4.24	0	2.9	0	0	4.24
AT3G03840	4.24	0	0	4.24	0	0
AT3G04910	4.24	0	2.56	0	0	4.24
AT3G04920	4.24	4.24	0	4.01	0	0
AT3G07360	4.24	0	2.78	4.24	0	0
AT3G24542	4.24	0	0	0	0	4.24
AT3G24550	4.24	4.24	0	0	0	0
AT3G50685	4.24	4.24	0	0	0	0
AT3G50690	4.24	2.45	0	4.24	0	0
AT3G50700	4.24	4.24	0	2.45	0	0
AT3G57540	4.24	4.24	0	0	0	0
AT3G60390	4.24	0	3.68	4.24	0	0
AT3G62980	4.24	0	0	4.24	0	0
AT4G02540	4.24	0	0	4.24	0	0
AT4G03113	4.24	0	0	0	4.24	0
AT4G03115	4.24	0	0	0	4.24	0
AT4G16515	4.24	0	0	4.24	0	0
AT4G16520	4.24	0	0	0	0	4.24
AT4G22780	4.24	4.24	0	3.12	2.56	0
AT4G22810	4.24	0	0	0	0	4.24
AT4G24240	4.24	0	0	3.68	4.24	0
AT4G26080	4.24	0	4.24	0	0	0
AT4G26090	4.24	0	0	4.24	0	0
AT4G26095	4.24	0	0	0	0	4.24
AT4G27330	4.24	4.24	0	0	0	0
AT4G35790	4.24	0	0	0	4.24	0
AT4G35800	4.24	0	0	0	0	4.24
AT5G05140	4.24	0	4.24	0	0	3.44
AT5G10945	4.24	0	0	4.24	0	0
AT5G10946	4.24	0	0	4.24	0	0
AT5G12330	4.24	0	4.24	0	0	0
AT5G13090	4.24	0	4.24	0	0	2.56
AT5G13100	4.24	0	0	4.24	0	0
AT5G13110	4.24	4.24	0	0	0	0
AT5G14700	4.24	4.24	0	0	0	0
AT5G14710	4.24	0	0	4.24	0	0
AT5G19110	4.24	4.24	3.34	0	0	0
AT5G19120	4.24	0	0	3.34	4.24	2.56
AT5G19130	4.24	0	0	0	2.56	4.24
AT5G42100	4.24	0	0	4.24	0	3.12
AT5G42110	4.24	0	0	0	0	4.24
AT5G44010	4.24	4.24	0	0	0	0
AT5G44020	4.24	0	0	4.24	2.45	0
AT5G44030	4.24	4.24	0	2.45	0	0
AT5G44440	4.24	0	4.24	0	0	0
AT5G44450	4.24	0	0	0	0	4.24
AT5G45580	4.24	0	4.24	0	0	0
AT5G45590	4.24	0	0	0	0	4.24
AT5G66320	4.24	4.24	0	0	0	0
AT5G66330	4.24	0	0	0	0	4.24
AT5G66340	4.24	4.24	0	0	0	0
AT1G16870	4.13	4.13	0	0	0	0
AT1G16880	4.13	0	0	0	4.13	0
AT1G16890	4.13	0	0	0	0	4.13
AT1G28670	4.13	0	4.13	0	0	0
AT1G28680	4.13	0	0	0	4.13	0
AT1G28685	4.13	0	0	0	4.13	0
AT1G29300	4.13	0	0	0	4.13	2.45
AT1G29440	4.13	2.45	2.67	4.13	0	0
AT1G30630	4.13	0	0	4.13	0	0
AT1G30640	4.13	0	0	4.13	0	0
AT1G61660	4.13	0	0	0	0	4.13
AT1G68660	4.13	4.13	0	0	0	0
AT1G68670	4.13	0	0	4.13	2.56	0
AT1G78220	4.13	4.13	0	0	0	0
AT1G78230	4.13	0	0	4.13	0	0
AT2G22426	4.13	0	0	0	0	4.13
AT2G24780	4.13	0	0	4.13	0	0
AT2G24790	4.13	0	0	4.13	0	0
AT2G33470	4.13	0	3.9	4.13	0	0
AT2G33480	4.13	0	4.13	3.9	0	0
AT2G41810	4.13	4.13	0	0	0	0
AT2G43320	4.13	0	0	4.13	0	0
AT2G43330	4.13	0	0	4.13	0	4.01
AT2G45950	4.13	2.34	4.13	4.01	0	0
AT3G04850	4.13	4.13	0	0	0	0
AT3G04854	4.13	0	0	0	0	4.13
AT3G04855	4.13	0	0	4.13	0	0
AT3G17080	4.13	0	0	0	0	4.13
AT3G17090	4.13	0	0	4.13	0	0
AT3G19540	4.13	0	0	4.13	0	0
AT3G23633	4.13	4.13	3.23	0	0	0
AT3G60030	4.13	0	0	4.13	0	0
AT3G62640	4.13	2.34	0	4.13	0	2.45
AT3G62650	4.13	0	2.45	4.13	0	2.34
AT4G01690	4.13	0	4.13	0	0	0
AT4G17670	4.13	0	4.13	3.23	0	0
AT4G24760	4.13	0	0	4.13	0	0
AT4G33460	4.13	4.13	0	0	0	0
AT4G33467	4.13	0	0	4.13	0	0
AT4G33470	4.13	0	0	0	0	4.13
AT4G36648	4.13	0	0	4.13	2.9	0
AT4G36650	4.13	0	0	0	0	4.13
AT5G01210	4.13	0	0	0	0	4.13
AT5G01215	4.13	0	0	4.13	0	0
AT5G01220	4.13	0	0	0	0	4.13
AT5G19770	4.13	4.13	0	3.01	0	0
AT5G19780	4.13	3.01	0	4.13	0	0
AT5G22740	4.13	0	0	0	4.13	0
AT5G39860	4.13	4.13	3.68	3.12	0	0
AT5G44060	4.13	0	0	0	4.13	0
AT5G44065	4.13	0	4.13	0	0	0
AT5G53660	4.13	0	0	4.13	0	0
AT5G53670	4.13	4.13	0	0	0	0
AT5G62460	4.13	0	0	0	0	4.13
AT1G78670	4.09	0	0	0	0	4.09
AT1G78680	4.09	0	0	4.09	0	0
AT1G78690	4.09	4.09	0	0	0	3.9
AT2G45840	4.06	4.06	0	0	0	0
AT3G26500	4.06	0	4.06	0	0	0
AT3G26510	4.06	0	2.78	0	4.06	0
AT1G03080	4.01	4.01	0	0	0	0
AT1G03090	4.01	0	0	4.01	0	2.56
AT1G05870	4.01	0	0	4.01	0	0
AT1G05880	4.01	0	4.01	0	0	0
AT1G12940	4.01	0	0	0	0	4.01
AT1G12950	4.01	0	0	4.01	0	0
AT1G15110	4.01	0	0	0	0	4.01
AT1G15120	4.01	0	0	4.01	0	0
AT1G15125	4.01	4.01	0	0	0	0
AT1G17220	4.01	0	0	0	0	4.01
AT1G17230	4.01	0	0	4.01	0	0
AT1G20010	4.01	0	4.01	0	2.56	0
AT1G20015	4.01	0	2.56	0	0	4.01
AT1G20020	4.01	0	0	4.01	0	0
AT1G20620	4.01	0	0	2.78	4.01	0
AT1G20630	4.01	4.01	3.23	3.85	0	0
AT1G49210	4.01	0	0	4.01	0	0
AT1G50450	4.01	0	0	4.01	0	0
AT1G50460	4.01	4.01	0	0	0	0
AT1G70290	4.01	4.01	2.34	0	0	2.78
AT1G70300	4.01	0	0	0	0	4.01
AT1G73680	4.01	0	0	4.01	0	0
AT1G74920	4.01	0	4.01	0	0	0
AT1G74929	4.01	0	3.01	0	0	4.01
AT1G74930	4.01	0	0	4.01	0	3.01
AT1G74940	4.01	4.01	0	3.01	0	0
AT1G76490	4.01	0	0	0	3.01	4.01
AT2G01410	4.01	0	4.01	2.9	0	0
AT2G05786	4.01	0	0	0	4.01	0
AT2G05790	4.01	0	0	4.01	0	0
AT2G07678	4.01	4.01	0	0	0	0
AT2G07741	4.01	0	2.94	4.01	0	0
AT2G07748	4.01	4.01	0	0	0	0
AT2G07766	4.01	2.94	4.01	0	0	0
AT2G07835	4.01	0	0	0	4.01	2.94
AT2G30870	4.01	0	0	4.01	0	0
AT2G36390	4.01	0	0	0	0	4.01
AT2G36400	4.01	0	0	0	4.01	0
AT2G43010	4.01	0	0	4.01	4.01	0
AT2G46600	4.01	0	0	4.01	0	0
AT2G46610	4.01	0	0	0	0	4.01
AT2G46780	4.01	0	4.01	2.9	0	0
AT3G03150	4.01	0	0	4.01	0	0
AT3G03160	4.01	0	0	4.01	0	0
AT3G03170	4.01	4.01	0	0	0	0
AT3G06080	4.01	0	0	4.01	0	0
AT3G06090	4.01	4.01	0	0	0	0
AT3G12280	4.01	0	0	4.01	0	0
AT3G12290	4.01	0	0	4.01	0	0
AT3G14380	4.01	0	0	0	0	4.01
AT3G25920	4.01	0	4.01	0	0	0
AT3G25930	4.01	0	0	4.01	0	0
AT3G25940	4.01	0	0	4.01	0	0
AT3G25950	4.01	0	4.01	0	0	0
AT3G51660	4.01	0	4.01	0	0	0
AT3G51670	4.01	4.01	0	3.23	0	0
AT4G01328	4.01	4.01	0	0	2.9	0
AT4G01330	4.01	0	0	2.9	0	4.01
AT4G01335	4.01	0	0	4.01	0	0
AT4G01340	4.01	0	4.01	0	0	0
AT4G12730	4.01	0	0	3.12	0	4.01
AT4G17500	4.01	0	0	4.01	0	0
AT4G20250	4.01	0	0	0	4.01	0
AT4G20260	4.01	0	3.12	4.01	0	0
AT4G27710	4.01	0	0	0	0	4.01
AT4G27720	4.01	0	0	4.01	0	0
AT4G35470	4.01	0	0	4.01	0	0
AT4G37240	4.01	0	0	4.01	0	0
AT4G37590	4.01	0	0	4.01	0	0
AT4G37608	4.01	4.01	0	0	0	0
AT4G39840	4.01	0	0	0	0	4.01
AT4G39850	4.01	0	4.01	0	0	0
AT5G01595	4.01	0	0	2.45	4.01	3.34
AT5G01600	4.01	0	0	3.34	4.01	2.45
AT5G01610	4.01	0	4.01	3.34	0	0
AT5G01620	4.01	4.01	0	0	0	0
AT5G05850	4.01	4.01	0	2.9	0	0
AT5G05860	4.01	0	0	2.9	0	4.01
AT5G05870	4.01	2.9	0	4.01	0	0
AT5G05880	4.01	4.01	0	0	0	0
AT5G13750	4.01	0	0	0	0	4.01
AT5G13760	4.01	0	0	4.01	0	0
AT5G16567	4.01	0	4.01	0	3.01	0
AT5G19220	4.01	0	0	4.01	0	0
AT5G19230	4.01	0	0	4.01	0	0
AT5G19240	4.01	4.01	0	0	0	0
AT5G52070	4.01	4.01	0	0	0	0
AT5G57780	4.01	0	0	4.01	0	0
AT5G66820	4.01	0	0	4.01	0	0
AT4G05320	3.95	0	0	2.56	3.43	3.95
AT4G05330	3.95	0	0	0	0	3.95
AT1G03790	3.9	0	0	0	0	3.9
AT1G03800	3.9	0	0	0	0	3.9
AT1G03810	3.9	3.9	3.79	0	0	0
AT1G07200	3.9	3.9	2.67	0	0	0
AT1G07210	3.9	0	2.67	3.9	0	0
AT1G08110	3.9	0	0	0	0	3.9
AT1G08115	3.9	0	0	3.9	0	0
AT1G08120	3.9	0	0	3.9	0	0
AT1G10560	3.9	0	0	3.9	0	0
AT1G11090	3.9	0	0	3.9	0	0
AT1G14380	3.9	0	0	3.9	0	0
AT1G14390	3.9	0	3.9	0	0	0
AT1G22990	3.9	0	0	0	0	3.9
AT1G23000	3.9	3.9	0	0	0	0
AT1G25220	3.9	3.9	0	2.9	0	0
AT1G26945	3.9	0	3.9	0	3.68	0
AT1G48280	3.9	0	0	3.9	0	0
AT1G59620	3.9	0	0	3.9	0	0
AT1G68550	3.9	0	0	3.9	0	2.9
AT1G68552	3.9	0	0	3.9	0	2.9
AT1G75500	3.9	0	3.57	0	3.9	3.01
AT1G78700	3.9	0	0	3.9	0	0
AT1G78710	3.9	3.9	0	0	0	0
AT2G16660	3.9	3.9	0	0	0	0
AT2G16668	3.9	0	0	0	0	3.9
AT2G30360	3.9	0	0	3.9	0	0
AT2G30362	3.9	0	0	0	3.9	0
AT2G30368	3.9	0	0	0	0	3.9
AT2G37930	3.9	0	0	0	0	3.9
AT2G37940	3.9	0	3.9	0	0	0
AT2G42750	3.9	0	0	0	0	3.9
AT2G42760	3.9	0	0	0	3.9	0
AT2G44810	3.9	0	3.9	0	0	0
AT2G45880	3.9	0	0	3.9	0	0
AT2G45890	3.9	0	0	3.9	0	0
AT2G46640	3.9	0	0	3.9	0	0
AT2G47500	3.9	0	3.9	0	0	0
AT3G05830	3.9	0	0	0	0	3.9
AT3G05835	3.9	0	0	0	0	3.9
AT3G05840	3.9	0	0	3.9	0	0
AT3G13700	3.9	3.9	0	0	0	0
AT3G13710	3.9	3.9	0	0	0	0
AT3G13720	3.9	0	0	3.9	0	0
AT3G13724	3.9	0	0	0	0	3.9
AT3G14090	3.9	0	3.9	0	0	0
AT3G14100	3.9	0	0	3.9	0	0
AT3G22380	3.9	2.9	2.9	0	2.84	3.9
AT3G27210	3.9	0	0	3.9	0	0
AT3G30775	3.9	3.9	0	3.01	0	0
AT3G48515	3.9	3.9	0	0	0	0
AT3G48520	3.9	0	0	3.9	0	0
AT3G49790	3.9	0	0	0	0	3.9
AT3G50650	3.9	0	3.34	3.9	0	0
AT3G50651	3.9	0	0	0	3.9	3.34
AT3G52470	3.9	0	3.9	0	0	0
AT3G60190	3.9	0	0	3.9	0	0
AT3G60200	3.9	0	0	3.9	0	0
AT4G00310	3.9	0	0	3.9	0	0
AT4G36790	3.9	0	3.9	0	0	0
AT5G02020	3.9	0	0	3.9	0	0
AT5G02021	3.9	0	0	0	3.9	0
AT5G02960	3.9	0	0	3.9	0	0
AT5G02970	3.9	0	0	3.9	0	0
AT5G07760	3.9	0	0	0	0	3.9
AT5G07770	3.9	0	0	3.9	0	0
AT5G07790	3.9	0	0	0	0	3.9
AT5G07800	3.9	0	0	0	3.9	0
AT5G09620	3.9	0	0	3.9	0	0
AT5G09630	3.9	0	0	0	0	3.9
AT5G09640	3.9	3.9	0	0	0	0
AT5G19190	3.9	0	0	3.12	0	3.9
AT5G19200	3.9	0	3.12	3.9	0	0
AT5G22910	3.9	0	0	3.9	0	0
AT5G23630	3.9	0	0	3.9	0	0
AT5G23640	3.9	0	0	0	3.9	0
AT5G23650	3.9	0	3.9	0	0	0
AT5G25280	3.9	0	0	3.9	2.94	0
AT5G26146	3.9	3.57	0	0	3.9	0
AT5G26150	3.9	0	0	0	3.9	0
AT5G38480	3.9	0	0	3.9	0	0
AT5G41900	3.9	0	0	0	3.9	0
AT5G47390	3.9	0	0	0	0	3.9
AT5G47400	3.9	0	0	3.9	0	0
AT5G50330	3.9	3.9	0	0	0	0
AT5G50335	3.9	0	3.9	0	0	0
AT5G50340	3.9	0	0	0	0	3.9
AT5G57060	3.9	0	0	0	0	3.9
AT5G57090	3.9	0	0	0	3.9	0
AT5G59540	3.9	3.9	0	3.23	0	0
AT5G59550	3.9	0	0	3.9	0	3.23
AT5G59560	3.9	0	0	0	0	3.9
AT5G61580	3.9	0	0	0	0	3.9
AT5G61590	3.9	0	3.34	3.57	0	3.9
AT5G62220	3.9	0	2.34	3.9	0	0
AT5G62270	3.9	0	0	0	0	3.9
AT5G62280	3.9	3.9	2.34	0	0	3.57
AT3G19070	3.8	0	0	0	3.8	0
AT3G19080	3.8	0	3.8	0	0	0
AT1G01060	3.79	0	0	3.79	0	0
AT1G01070	3.79	0	0	0	0	3.79
AT1G01250	3.79	3.79	0	0	0	0
AT1G01260	3.79	0	3.79	0	0	0
AT1G13230	3.79	0	0	0	0	3.79
AT1G13370	3.79	3.79	0	0	0	0
AT1G13380	3.79	0	0	3.79	0	0
AT1G14890	3.79	0	0	3.79	0	3.45
AT1G14920	3.79	3.45	3.79	0	0	0
AT1G21770	3.79	0	3.79	0	0	0
AT1G21780	3.79	0	0	0	0	3.79
AT1G21790	3.79	0	0	3.79	0	0
AT1G22900	3.79	3.79	0	0	0	0
AT1G22910	3.79	0	0	0	3.79	0
AT1G25560	3.79	3.79	0	3.57	2.34	0
AT1G27670	3.79	0	0	3.01	0	3.79
AT1G28327	3.79	0	0	0	0	3.79
AT1G31410	3.79	0	0	3.79	0	0
AT1G31420	3.79	0	0	3.79	0	0
AT1G33240	3.79	0	0	3.79	0	2.34
AT1G34110	3.79	0	0	0	3.79	0
AT1G35250	3.79	3.79	0	0	0	0
AT1G35255	3.79	0	0	3.79	0	0
AT1G35260	3.79	0	0	0	0	3.79
AT1G64700	3.79	3.79	0	0	0	0
AT1G64710	3.79	0	3.79	0	0	0
AT1G65930	3.79	3.68	0	3.79	0	0
AT1G73687	3.79	0	2.9	3.79	0	0
AT1G73690	3.79	0	3.79	2.9	0	0
AT1G76080	3.79	0	0	3.79	0	0
AT1G76090	3.79	2.56	0	0	0	3.79
AT2G16600	3.79	0	0	0	0	3.79
AT2G20300	3.79	0	0	3.79	0	0
AT2G20310	3.79	0	0	0	0	3.79
AT2G20670	3.79	0	0	3.79	3.68	0
AT2G22668	3.79	0	0	3.79	0	0
AT2G22670	3.79	0	3.79	0	0	0
AT2G23100	3.79	3.79	0	0	0	0
AT2G23110	3.79	0	0	0	0	3.79
AT2G23118	3.79	3.79	0	0	3.79	0
AT2G23120	3.79	0	0	3.79	0	0
AT2G23130	3.79	3.79	0	3.79	0	0
AT2G37630	3.79	2.67	3.79	0	0	0
AT2G40140	3.79	0	3.79	0	0	0
AT2G40260	3.79	3.79	0	0	0	0
AT2G41090	3.79	0	0	0	0	3.79
AT2G41100	3.79	0	0	3.79	0	3.34
AT2G44070	3.79	3.79	0	0	0	0
AT2G44080	3.79	3.79	0	2.9	0	0
AT2G45350	3.79	3.79	0	0	0	0
AT2G45360	3.79	0	0	0	3.79	0
AT2G45380	3.79	0	0	0	0	3.79
AT3G02540	3.79	3.79	0	2.45	0	0
AT3G02550	3.79	0	0	3.79	2.45	0
AT3G05420	3.79	0	0	0	0	3.79
AT3G05425	3.79	0	0	0	3.79	0
AT3G05430	3.79	0	0	3.79	0	0
AT3G06750	3.79	2.45	0	0	0	3.79
AT3G13520	3.79	0	0	2.67	0	3.79
AT3G13525	3.79	2.67	3.79	0	0	0
AT3G15620	3.79	0	3.79	3.45	0	0
AT3G15630	3.79	0	0	3.79	0	3.45
AT3G15640	3.79	3.45	3.79	0	0	0
AT3G16785	3.79	0	0	0	3.79	0
AT3G16800	3.79	3.79	0	0	0	0
AT3G23690	3.79	0	0	3.79	0	0
AT3G23700	3.79	0	0	0	0	3.79
AT3G23710	3.79	3.79	0	0	0	0
AT3G47610	3.79	0	0	0	3.79	3.34
AT3G50337	3.79	2.45	3.79	0	0	0
AT3G50340	3.79	0	0	0	2.45	3.79
AT3G54940	3.79	0	0	0	0	3.79
AT3G60520	3.79	3.79	0	0	0	0
AT3G61150	3.79	0	0	0	3.79	0
AT3G61160	3.79	0	3.79	0	0	0
AT4G00500	3.79	0	0	3.79	0	0
AT4G00520	3.79	0	0	3.79	0	0
AT4G05100	3.79	0	0	0	0	3.79
AT4G17695	3.79	0	3.79	0	0	0
AT4G17700	3.79	3.79	0	0	0	0
AT4G24270	3.79	0	0	3.79	0	0
AT4G24275	3.79	0	0	3.79	0	0
AT4G24280	3.79	0	3.79	0	0	0
AT4G30240	3.79	0	0	3.79	0	0
AT4G31070	3.79	0	0	3.79	0	0
AT4G31075	3.79	0	0	0	0	3.79
AT4G31080	3.79	0	0	3.79	0	0
AT4G31100	3.79	3.79	0	0	0	0
AT4G32285	3.79	3.79	0	0	0	0
AT4G36900	3.79	0	0	0	0	3.79
AT4G36910	3.79	0	0	0	0	3.79
AT4G38620	3.79	0	0	0	0	3.79
AT5G01230	3.79	0	3.79	0	0	0
AT5G01240	3.79	0	0	3.79	0	0
AT5G02580	3.79	0	0	2.9	0	3.79
AT5G02590	3.79	0	3.79	0	0	0
AT5G03220	3.79	0	0	0	0	3.79
AT5G03230	3.79	3.79	0	0	0	0
AT5G11740	3.79	0	0	3.79	0	0
AT5G40900	3.79	3.79	0	0	0	0
AT5G49690	3.79	2.78	0	3.79	0	0
AT5G49700	3.79	0	0	3.79	0	2.78
AT5G52890	3.79	3.79	0	0	0	0
AT5G58070	3.79	0	0	3.79	0	0
AT5G58080	3.79	0	0	0	0	3.79
AT5G62170	3.79	0	0	0	2.67	3.79
AT5G65280	3.79	0	0	3.79	0	0
AT5G65290	3.79	0	3.79	0	0	0
AT1G04550	3.68	0	0	3.68	0	0
AT1G04555	3.68	3.68	0	0	0	0
AT1G06160	3.68	0	0	3.68	0	0
AT1G08510	3.68	0	0	2.34	3.68	0
AT1G11820	3.68	0	3.68	0	0	0
AT1G11840	3.68	0	0	0	3.68	0
AT1G14270	3.68	3.01	0	3.68	0	0
AT1G14280	3.68	0	0	3.68	0	3.01
AT1G16730	3.68	0	0	3.68	0	0
AT1G16740	3.68	0	0	3.68	0	0
AT1G17940	3.68	0	3.68	0	0	0
AT1G19100	3.68	0	0	0	0	3.68
AT1G19110	3.68	0	0	3.68	0	0
AT1G21380	3.68	0	0	3.68	0	0
AT1G21390	3.68	2.67	0	0	0	3.68
AT1G24260	3.68	3.68	0	0	0	0
AT1G24265	3.68	0	3.68	0	0	0
AT1G26771	3.68	3.68	0	0	0	0
AT1G26773	3.68	0	0	0	0	3.68
AT1G49510	3.68	3.68	0	0	0	0
AT1G54100	3.68	0	0	3.68	0	0
AT1G54110	3.68	0	0	3.68	0	0
AT1G54115	3.68	3.68	0	0	0	3.68
AT1G54120	3.68	3.68	0	0	0	0
AT1G69910	3.68	0	0	0	3.68	0
AT1G73470	3.68	0	0	0	0	3.68
AT1G73480	3.68	0	0	3.68	0	0
AT1G75388	3.68	0	3.68	0	0	0
AT1G75390	3.68	0	3.68	0	0	0
AT1G78590	3.68	0	0	0	0	3.68
AT1G78600	3.68	0	0	3.68	0	0
AT2G02710	3.68	0	0	3.68	0	0
AT2G02720	3.68	0	3.68	0	0	0
AT2G04500	3.68	0	2.56	3.68	0	0
AT2G05380	3.68	0	0	3.01	3.68	0
AT2G22990	3.68	3.34	3.68	0	0	0
AT2G24540	3.68	0	0	0	3.68	0
AT2G24625	3.68	0	0	0	3.68	0
AT2G27490	3.68	3.68	0	0	0	0
AT2G27500	3.68	0	0	0	3.68	0
AT2G27650	3.68	0	3.68	0	0	0
AT2G27660	3.68	0	0	0	3.68	0
AT2G29720	3.68	0	3.68	0	0	0
AT2G29730	3.68	0	0	3.68	0	0
AT2G30240	3.68	2.34	0	0	0	3.68
AT2G32415	3.68	3.68	0	0	0	0
AT2G32430	3.68	3.68	0	0	0	0
AT2G35600	3.68	0	0	3.68	0	0
AT2G35605	3.68	0	0	3.68	0	0
AT2G35950	3.68	2.78	2.67	3.68	0	0
AT2G35960	3.68	3.68	0	0	0	0
AT2G36050	3.68	3.68	3.23	0	0	0
AT2G36053	3.68	0	0	3.23	0	3.68
AT3G05220	3.68	0	0	0	3.68	0
AT3G05230	3.68	2.34	3.68	0	0	0
AT3G12590	3.68	2.34	0	3.68	0	0
AT3G12600	3.68	0	0	3.68	0	2.34
AT3G17180	3.68	3.68	0	0	0	0
AT3G17185	3.68	0	0	3.68	0	0
AT3G18850	3.68	0	0	3.68	0	0
AT3G18860	3.68	0	0	3.68	0	0
AT3G20250	3.68	0	0	3.68	0	0
AT3G20260	3.68	0	0	0	0	3.68
AT3G24820	3.68	0	3.68	0	0	0
AT3G24830	3.68	0	0	0	0	3.68
AT3G24840	3.68	0	0	3.68	0	0
AT3G27580	3.68	0	3.68	0	0	0
AT3G27590	3.68	0	0	0	3.68	0
AT3G46450	3.68	0	0	3.68	0	0
AT3G46460	3.68	0	0	0	0	3.68
AT3G47630	3.68	0	3.68	0	0	0
AT3G47640	3.68	0	0	3.68	0	0
AT3G47650	3.68	3.68	0	0	0	0
AT3G47940	3.68	0	3.68	0	0	0
AT3G47950	3.68	0	3.68	0	0	0
AT3G48690	3.68	0	0	3.68	0	0
AT3G48700	3.68	0	0	0	0	3.68
AT3G48710	3.68	3.68	0	0	0	0
AT3G59960	3.68	0	0	0	0	3.68
AT3G59970	3.68	0	0	3.68	0	0
AT3G61420	3.68	0	2.56	3.68	0	0
AT3G61430	3.68	0	2.56	3.68	0	0
AT4G01930	3.68	3.68	0	0	0	0
AT4G01940	3.68	0	0	3.68	0	0
AT4G01950	3.68	0	0	0	0	3.68
AT4G12000	3.68	0	3.68	0	0	0
AT4G12005	3.68	0	0	3.68	0	0
AT4G12010	3.68	0	0	0	0	3.68
AT4G12420	3.68	3.45	0	0	0	3.68
AT4G13000	3.68	0	3.68	0	0	0
AT4G13010	3.68	0	0	3.68	0	0
AT4G13020	3.68	3.68	0	0	0	0
AT4G13395	3.68	0	3.68	3.23	0	0
AT4G13400	3.68	0	0	0	0	3.68
AT4G13780	3.68	0	3.68	0	0	0
AT4G13790	3.68	0	0	3.68	0	0
AT4G17750	3.68	3.68	0	0	0	0
AT4G17760	3.68	0	0	0	0	3.68
AT4G17765	3.68	0	0	3.68	0	0
AT4G17770	3.68	3.68	0	0	0	0
AT4G19700	3.68	0	3.68	0	0	2.9
AT4G24230	3.68	3.68	0	0	0	0
AT4G25770	3.68	0	0	3.68	0	0
AT4G25780	3.68	0	0	3.68	0	0
AT4G26210	3.68	3.68	0	0	0	0
AT4G27440	3.68	0	0	2.45	3.68	2.34
AT4G27450	3.68	0	3.12	3.57	2.34	3.68
AT4G28485	3.68	0	3.68	0	0	0
AT4G28490	3.68	0	0	3.68	0	0
AT4G28630	3.68	0	0	3.68	0	0
AT4G28640	3.68	0	0	3.68	0	0
AT4G30340	3.68	0	0	3.68	0	0
AT4G32890	3.68	0	3.68	0	0	0
AT4G33080	3.68	0	0	3.68	0	0
AT4G33560	3.68	0	0	0	0	3.68
AT4G33565	3.68	0	0	3.68	0	0
AT4G33580	3.68	0	3.68	0	0	0
AT4G35780	3.68	0	0	3.68	0	0
AT4G35783	3.68	0	0	3.68	0	0
AT4G37260	3.68	3.01	0	3.68	0	2.34
AT5G03520	3.68	0	0	3.68	0	0
AT5G20700	3.68	0	3.68	0	0	2.56
AT5G20710	3.68	3.68	0	0	0	0
AT5G41070	3.68	0	0	0	0	3.68
AT5G41071	3.68	0	0	0	0	3.68
AT5G41080	3.68	0	3.68	3.01	0	2.34
AT5G41590	3.68	3.68	3.45	0	0	0
AT5G41600	3.68	0	0	3.68	0	0
AT5G41605	3.68	3.68	0	0	0	0
AT5G41612	3.68	3.68	0	0	0	0
AT5G42740	3.68	0	0	0	0	3.68
AT5G53290	3.68	0	0	3.68	0	0
AT5G53410	3.68	3.68	0	0	0	2.34
AT5G55960	3.68	0	0	0	0	3.68
AT5G55970	3.68	0	3.68	0	0	0
AT5G58900	3.68	0	3.68	0	0	0
AT5G59220	3.68	3.68	0	0	0	0
AT5G59230	3.68	3.68	0	2.45	0	0
AT5G61960	3.68	3.68	0	0	0	0
AT5G61970	3.68	0	3.68	0	0	0
AT5G64860	3.68	0	0	3.68	0	0
AT5G64870	3.68	0	0	0	0	3.68
AT5G64880	3.68	3.68	0	0	0	0
AT5G67420	3.68	0	0	3.23	0	3.68
AT2G17660	3.65	0	0	0	0	3.65
AT2G17670	3.65	0	0	3.65	0	0
AT3G02460	3.64	0	0	0	0	3.64
AT3G02468	3.64	0	0	3.64	2.67	0
AT3G02470	3.64	0	0	3.64	2.67	0
AT2G07705	3.62	2.43	0	0	0	3.62
AT2G07706	3.62	0	0	0	3.62	0
AT1G15385	3.57	3.57	0	0	0	0
AT1G15390	3.57	0	0	0	0	3.57
AT1G15400	3.57	0	0	0	3.57	0
AT1G15410	3.57	3.57	0	0	0	0
AT1G15757	3.57	0	0	0	0	3.57
AT1G15760	3.57	3.57	0	0	0	0
AT1G19480	3.57	0	0	0	0	3.57
AT1G19485	3.57	0	0	3.57	0	0
AT1G19870	3.57	0	3.57	0	0	0
AT1G19880	3.57	0	0	0	0	3.57
AT1G20980	3.57	0	3.57	0	0	0
AT1G22060	3.57	0	3.57	0	0	0
AT1G52890	3.57	0	0	3.57	0	0
AT1G61100	3.57	0	0	3.57	0	0
AT1G64140	3.57	0	0	3.57	0	0
AT1G64142	3.57	0	0	3.57	0	0
AT1G68990	3.57	0	0	3.57	0	0
AT1G69000	3.57	0	0	0	0	3.57
AT1G69010	3.57	0	0	3.57	0	0
AT1G69690	3.57	3.57	0	0	0	0
AT1G72420	3.57	3.57	0	3.23	0	0
AT1G72430	3.57	0	0	3.57	0	3.23
AT1G73880	3.57	0	0	0	3.57	0
AT1G73885	3.57	0	0	3.57	0	0
AT2G01910	3.57	0	0	3.57	0	0
AT2G02870	3.57	0	3.57	0	0	0
AT2G07746	3.57	0	0	3.57	0	0
AT2G07752	3.57	0	0	3.57	0	0
AT2G07753	3.57	0	0	3.57	0	0
AT2G07754	3.57	0	0	3.57	0	0
AT2G07772	3.57	3.57	0	0	0	0
AT2G07774	3.57	0	0	0	3.57	0
AT2G18720	3.57	0	3.57	0	0	0
AT2G18721	3.57	0	0	0	0	3.57
AT2G18730	3.57	0	0	3.57	0	0
AT2G20060	3.57	0	3.57	2.45	0	0
AT2G20921	3.57	3.57	0	0	0	0
AT2G20930	3.57	0	3.57	0	0	0
AT2G20940	3.57	0	0	3.57	0	0
AT2G20950	3.57	0	0	3.57	0	0
AT2G35620	3.57	0	0	3.57	0	0
AT2G35630	3.57	0	3.57	0	0	0
AT2G41060	3.57	0	0	0	0	3.57
AT2G41070	3.57	0	0	3.57	0	0
AT2G41080	3.57	3.57	0	0	0	0
AT2G45050	3.57	3.23	0	0	3.57	0
AT2G45600	3.57	0	0	3.57	2.56	0
AT2G45610	3.57	3.57	0	2.56	0	0
AT3G05870	3.57	0	0	0	0	3.57
AT3G05880	3.57	0	0	0	0	3.57
AT3G06868	3.57	0	0	0	0	3.57
AT3G06870	3.57	0	0	3.57	0	0
AT3G16250	3.57	0	0	0	3.01	3.57
AT3G16260	3.57	3.57	0	0	0	0
AT3G21320	3.57	0	3.12	3.57	0	0
AT3G44250	3.57	3.57	0	0	0	0
AT3G44260	3.57	0	0	3.57	0	0
AT3G45780	3.57	0	3.57	0	0	0
AT3G47295	3.57	0	0	3.57	0	0
AT3G47300	3.57	0	0	0	0	3.57
AT3G53990	3.57	3.23	3.57	0	0	0
AT3G61880	3.57	3.57	0	0	3.57	0
AT4G09460	3.57	0	0	3.57	0	0
AT4G18020	3.57	0	0	0	3.57	0
AT4G28260	3.57	2.78	0	0	0	3.57
AT4G28270	3.57	0	0	0	0	3.57
AT4G34230	3.57	0	0	3.57	0	2.78
AT4G34240	3.57	0	0	3.57	0	0
AT4G36920	3.57	0	3.57	0	0	0
AT4G39350	3.57	0	0	0	0	3.57
AT4G39360	3.57	0	0	3.57	0	0
AT4G39361	3.57	3.57	0	0	0	0
AT4G39363	3.57	3.57	0	0	0	0
AT4G39364	3.57	3.57	0	0	0	0
AT5G05170	3.57	0	0	3.57	0	0
AT5G05180	3.57	0	0	3.57	0	0
AT5G06540	3.57	0	0	0	0	3.57
AT5G07000	3.57	0	3.57	0	2.78	0
AT5G07010	3.57	3.45	0	0	3.57	0
AT5G09890	3.57	0	0	3.57	0	0
AT5G09900	3.57	0	0	0	0	3.57
AT5G26147	3.57	3.57	0	2.78	0	0
AT5G43710	3.57	0	0	0	0	3.57
AT5G49280	3.57	0	0	3.57	0	0
AT5G49290	3.57	3.57	0	0	0	0
AT5G54290	3.57	0	0	0	0	3.57
AT5G54300	3.57	0	0	0	3.57	0
AT5G56040	3.57	0	0	0	0	3.57
AT5G59900	3.57	0	0	3.57	0	0
AT5G59910	3.57	0	0	3.57	0	0
AT5G59920	3.57	0	3.57	0	0	0
AT5G61600	3.57	0	0	0	3.34	3.57
AT5G62290	3.57	0	0	3.57	0	0
AT5G64570	3.57	3.57	0	0	0	0
AT2G07715	3.55	0	0	0	0	3.55
AT3G23490	3.52	0	0	0	3.52	0
AT1G10140	3.51	0	3.51	0	0	0
AT1G10150	3.51	0	3.51	0	0	0
AT2G01023	3.48	0	0	3.48	2.67	0
AT1G02130	3.45	0	0	3.45	0	0
AT1G02145	3.45	3.45	0	0	0	0
AT1G04990	3.45	0	0	3.45	0	0
AT1G08580	3.45	0	3.45	0	0	0
AT1G08590	3.45	0	0	3.45	0	0
AT1G09130	3.45	0	0	3.45	0	0
AT1G09140	3.45	0	0	0	0	3.45
AT1G09520	3.45	0	0	3.45	0	0
AT1G13250	3.45	3.45	0	0	0	0
AT1G13950	3.45	0	0	3.45	0	0
AT1G14620	3.45	0	3.45	0	0	0
AT1G14630	3.45	0	3.45	0	0	0
AT1G14900	3.45	0	0	0	0	3.45
AT1G18980	3.45	3.45	0	0	0	0
AT1G18990	3.45	0	0	3.45	0	0
AT1G19000	3.45	0	0	0	3.45	0
AT1G19460	3.45	0	0	3.45	0	0
AT1G19464	3.45	3.45	0	0	0	0
AT1G21130	3.45	0	0	3.45	0	0
AT1G21140	3.45	3.45	0	0	0	0
AT1G21350	3.45	3.45	0	0	0	0
AT1G21360	3.45	0	0	0	3.45	0
AT1G21370	3.45	3.45	0	0	0	0
AT1G24160	3.45	3.45	0	2.67	0	0
AT1G24170	3.45	0	0	3.45	0	2.67
AT1G25550	3.45	0	0	2.9	0	3.45
AT1G28360	3.45	0	2.45	0	0	3.45
AT1G31920	3.45	0	3.45	0	0	0
AT1G31930	3.45	0	0	3.45	0	0
AT1G32740	3.45	0	0	0	3.45	0
AT1G32750	3.45	0	0	0	0	3.45
AT1G53830	3.45	0	0	0	0	3.45
AT1G53840	3.45	0	0	3.45	0	0
AT1G63420	3.45	0	0	0	3.45	0
AT1G64385	3.45	2.67	3.45	0	0	0
AT1G68840	3.45	3.34	3.45	0	0	0
AT1G77740	3.45	3.45	0	0	0	0
AT1G78010	3.45	0	0	0	0	3.45
AT1G78020	3.45	3.45	0	0	0	0
AT1G78110	3.45	3.45	0	0	0	0
AT1G78310	3.45	0	0	3.45	0	0
AT1G79590	3.45	0	0	0	0	3.45
AT1G79600	3.45	0	0	0	0	3.45
AT1G80230	3.45	0	3.45	0	0	0
AT1G80240	3.45	0	0	3.45	0	0
AT1G80245	3.45	0	3.45	0	0	0
AT1G80260	3.45	3.45	0	0	0	0
AT2G01850	3.45	0	3.45	0	0	3.12
AT2G03110	3.45	0	0	0	0	3.45
AT2G03120	3.45	0	0	3.45	0	0
AT2G03690	3.45	0	3.45	0	0	0
AT2G03700	3.45	0	0	3.45	0	0
AT2G07738	3.45	3.34	0	3.45	2.69	0
AT2G07759	3.45	0	2.78	3.45	0	3.34
AT2G07761	3.45	2.69	3.45	0	0	3.34
AT2G07762	3.45	2.69	3.45	0	0	3.34
AT2G07763	3.45	3.45	0	3.34	0	0
AT2G07806	3.45	0	0	0	3.45	3.12
AT2G16720	3.45	3.45	0	0	0	0
AT2G17705	3.45	0	0	0	0	3.45
AT2G17710	3.45	0	0	3.45	0	0
AT2G19450	3.45	0	0	0	0	3.45
AT2G19460	3.45	0	3.45	2.67	0	0
AT2G22790	3.45	0	0	0	3.45	0
AT2G22795	3.45	0	0	0	0	3.45
AT2G22802	3.45	0	3.45	0	0	0
AT2G22805	3.45	0	3.45	0	0	0
AT2G32710	3.45	0	0	0	0	3.45
AT2G32720	3.45	0	0	0	0	3.45
AT2G33320	3.45	0	0	0	2.34	3.45
AT2G39210	3.45	0	0	0	0	3.45
AT2G39860	3.45	2.78	3.45	0	0	0
AT2G39865	3.45	0	0	2.78	3.45	0
AT2G39870	3.45	0	3.45	0	0	0
AT2G40600	3.45	3.45	0	0	0	0
AT2G46070	3.45	3.45	0	0	0	0
AT2G46080	3.45	0	0	3.45	0	0
AT2G46090	3.45	0	0	3.45	0	0
AT2G46100	3.45	3.45	0	0	0	0
AT2G47170	3.45	0	0	0	0	3.45
AT2G47180	3.45	0	0	0	3.45	0
AT3G03260	3.45	3.45	0	0	0	0
AT3G03270	3.45	0	0	0	3.45	0
AT3G05490	3.45	0	3.45	0	0	0
AT3G06770	3.45	0	3.45	2.34	0	0
AT3G13970	3.45	3.45	2.45	0	0	0
AT3G15770	3.45	0	0	3.45	0	0
AT3G15780	3.45	0	3.45	0	0	0
AT3G23440	3.45	0	0	0	3.45	0
AT3G26810	3.45	0	2.56	3.45	0	0
AT3G27050	3.45	0	3.45	2.67	0	0
AT3G27060	3.45	0	0	3.45	2.67	0
AT3G27860	3.45	0	0	0	0	3.45
AT3G27865	3.45	0	0	3.45	0	0
AT3G27870	3.45	3.45	0	0	0	0
AT3G47340	3.45	0	0	0	3.45	2.9
AT3G47430	3.45	0	3.45	0	0	0
AT3G49220	3.45	0	0	0	3.45	0
AT3G49230	3.45	0	3.45	0	0	0
AT3G54910	3.45	3.45	0	0	0	0
AT3G54920	3.45	0	0	0	3.45	0
AT3G55840	3.45	3.45	0	0	0	0
AT3G55850	3.45	0	0	0	0	3.45
AT3G57410	3.45	0	0	3.45	0	0
AT3G57420	3.45	0	0	0	0	3.45
AT4G01023	3.45	0	0	0	0	3.45
AT4G01026	3.45	0	0	3.45	0	0
AT4G01030	3.45	0	0	0	0	3.45
AT4G01245	3.45	3.23	3.45	0	0	0
AT4G01250	3.45	3.45	3.23	0	0	0
AT4G23100	3.45	0	3.45	0	0	0
AT4G23103	3.45	0	0	3.45	2.45	0
AT4G23110	3.45	2.45	3.45	0	0	0
AT4G25260	3.45	0	0	3.45	0	0
AT4G28290	3.45	0	0	3.45	0	0
AT4G28300	3.45	0	3.45	0	0	0
AT4G29700	3.45	0	0	3.45	0	0
AT4G32070	3.45	0	0	3.45	0	0
AT4G32080	3.45	0	0	0	0	3.45
AT4G35090	3.45	3.45	0	0	0	0
AT4G35100	3.45	3.45	0	3.01	0	3.01
AT4G36030	3.45	3.07	3.45	2.56	0	0
AT4G36040	3.45	0	0	2.34	3.07	3.45
AT4G38520	3.45	0	0	3.45	0	0
AT4G38530	3.45	3.45	0	0	0	0
AT5G07430	3.45	0	0	0	0	3.45
AT5G07440	3.45	0	3.45	0	0	2.34
AT5G11225	3.45	0	3.45	0	0	0
AT5G11230	3.45	0	0	3.45	0	0
AT5G11240	3.45	3.45	0	0	0	0
AT5G15130	3.45	0	0	0	0	3.45
AT5G15140	3.45	0	3.45	0	0	0
AT5G19380	3.45	0	0	3.45	0	0
AT5G19390	3.45	0	0	0	3.45	0
AT5G20170	3.45	0	3.45	0	0	0
AT5G20180	3.45	0	0	0	0	3.45
AT5G20181	3.45	0	0	0	3.45	0
AT5G20190	3.45	0	3.45	0	0	0
AT5G43310	3.45	0	0	3.45	0	0
AT5G43320	3.45	0	0	0	0	3.45
AT5G54490	3.45	0	0	3.45	0	0
AT5G57100	3.45	0	0	3.45	0	0
AT5G57110	3.45	0	0	0	0	3.45
AT5G59050	3.45	0	0	0	3.45	0
AT5G64260	3.45	2.73	2.9	2.78	3.45	0
AT5G64270	3.45	3.23	3.45	0	0	0
AT5G65420	3.45	0	0	0	0	3.45
AT5G65660	3.45	2.9	2.56	0	0	3.45
AT2G45060	3.43	0	0	0	0	3.43
AT2G39990	3.35	0	3.35	2.56	0	0
AT2G40000	3.35	0	0	0	3.35	2.42
AT5G22630	3.35	0	0	0	3.35	0
AT1G01650	3.34	0	3.34	0	0	0
AT1G01660	3.34	0	0	0	0	3.34
AT1G02230	3.34	0	0	3.34	0	2.45
AT1G02250	3.34	0	0	0	0	3.34
AT1G05700	3.34	0	0	0	0	3.34
AT1G05710	3.34	0	3.34	0	0	0
AT1G07670	3.34	0	0	3.34	0	0
AT1G07680	3.34	0	3.34	0	0	0
AT1G07860	3.34	3.34	0	0	0	0
AT1G07870	3.34	0	0	3.34	0	0
AT1G18410	3.34	0	0	0	0	3.34
AT1G18735	3.34	0	3.34	0	0	0
AT1G18740	3.34	0	0	3.34	0	0
AT1G19835	3.34	3.34	3.01	0	0	0
AT1G21400	3.34	0	0	2.67	3.34	0
AT1G21410	3.34	0	0	3.34	0	0
AT1G21830	3.34	3.34	0	0	2.56	2.78
AT1G21835	3.34	0	0	3.34	0	0
AT1G21840	3.34	0	3.34	0	0	0
AT1G22180	3.34	3.34	0	0	0	0
AT1G22190	3.34	3.34	0	0	2.56	0
AT1G22810	3.34	0	0	3.34	0	0
AT1G22830	3.34	0	0	3.34	0	0
AT1G68490	3.34	2.45	0	0	0	3.34
AT1G68830	3.34	3.34	0	0	0	0
AT1G70900	3.34	0	0	3.34	0	0
AT1G70910	3.34	3.34	0	0	0	0
AT1G75710	3.34	0	0	0	3.34	0
AT1G76150	3.34	3.34	0	0	0	0
AT1G76160	3.34	2.9	0	2.9	3.34	0
AT1G76170	3.34	3.01	0	3.34	0	2.9
AT1G76180	3.34	0	0	3.01	0	3.34
AT1G77280	3.34	2.9	0	0	3.34	0
AT1G77290	3.34	3.34	0	2.9	0	0
AT1G80450	3.34	0	0	0	0	3.34
AT2G01570	3.34	0	3.34	0	0	0
AT2G07698	3.34	3.34	0	0	2.34	0
AT2G07739	3.34	3.34	2.34	3.01	0	3.34
AT2G07764	3.34	0	3.34	0	0	3.01
AT2G07765	3.34	0	3.34	3.01	0	3.34
AT2G07792	3.34	0	0	0	0	3.34
AT2G07798	3.34	0	0	0	3.34	0
AT2G17230	3.34	0	0	3.34	0	0
AT2G17240	3.34	3.34	0	0	0	0
AT2G26530	3.34	0	0	3.34	0	0
AT2G28510	3.34	0	3.34	0	0	0
AT2G31218	3.34	0	0	0	3.34	0
AT2G31220	3.34	0	0	3.34	0	0
AT2G36230	3.34	0	0	0	0	3.34
AT2G36240	3.34	3.34	0	0	0	0
AT2G38530	3.34	0	0	3.34	0	0
AT2G38540	3.34	3.34	0	0	0	0
AT2G40475	3.34	3.34	0	0	0	0
AT2G40480	3.34	0	0	3.34	0	0
AT2G40490	3.34	3.34	0	0	0	0
AT2G41110	3.34	0	0	3.34	0	0
AT2G43060	3.34	3.34	3.01	0	0	0
AT2G45180	3.34	0	0	2.45	0	3.34
AT2G46410	3.34	0	3.34	0	0	0
AT2G46420	3.34	0	3.34	0	0	0
AT3G03620	3.34	0	0	3.34	0	0
AT3G03626	3.34	0	0	0	3.34	0
AT3G03630	3.34	0	0	0	0	3.34
AT3G04420	3.34	0	0	0	0	3.34
AT3G04430	3.34	0	0	0	0	3.34
AT3G09975	3.34	0	0	3.34	0	0
AT3G09980	3.34	3.34	2.56	2.67	0	0
AT3G10020	3.34	0	0	3.34	0	0
AT3G10030	3.34	0	0	0	0	3.34
AT3G16860	3.34	0	3.34	0	0	0
AT3G16870	3.34	0	0	0	0	3.34
AT3G28956	3.34	0	0	3.34	0	0
AT3G28958	3.34	0	0	0	3.34	0
AT3G48260	3.34	0	0	3.34	0	0
AT3G48270	3.34	0	3.34	0	0	0
AT3G50660	3.34	0	0	3.23	3.34	0
AT3G54000	3.34	3.23	3.34	3.23	0	0
AT3G54950	3.34	0	0	0	0	3.34
AT3G56480	3.34	0	0	3.34	0	0
AT3G56490	3.34	0	3.34	0	0	0
AT3G59890	3.34	3.34	0	0	0	0
AT3G59900	3.34	0	0	3.34	0	0
AT3G60120	3.34	0	0	0	0	3.34
AT3G60130	3.34	0	3.34	0	0	0
AT3G62580	3.34	0	0	3.34	0	0
AT3G62720	3.34	0	0	3.34	0	0
AT4G00335	3.34	0	0	0	0	3.34
AT4G00340	3.34	0	0	3.34	0	0
AT4G09630	3.34	0	0	3.34	0	0
AT4G14110	3.34	3.23	3.34	0	0	0
AT4G14120	3.34	0	0	0	3.34	3.23
AT4G16480	3.34	0	0	0	0	3.34
AT4G16490	3.34	0	0	3.34	0	3.34
AT4G20770	3.34	0	3.34	0	0	0
AT4G20780	3.34	0	0	3.34	0	0
AT4G20790	3.34	0	0	0	0	3.34
AT4G23060	3.34	0	0	3.34	0	0
AT4G27870	3.34	0	0	2.78	3.34	0
AT4G28730	3.34	0	0	3.34	0	0
AT4G28740	3.34	3.34	0	0	0	0
AT4G29190	3.34	0	0	3.34	0	0
AT4G33150	3.34	0	0	3.34	3.34	0
AT4G33160	3.34	0	3.34	0	0	0
AT4G36160	3.34	0	0	0	0	3.34
AT5G01510	3.34	0	0	0	0	3.34
AT5G01520	3.34	0	0	3.34	0	0
AT5G01530	3.34	3.34	0	0	2.56	0
AT5G01750	3.34	0	0	0	0	3.34
AT5G01760	3.34	0	0	3.34	0	0
AT5G04470	3.34	3.34	0	0	0	2.78
AT5G04710	3.34	0	0	3.34	0	0
AT5G04720	3.34	0	0	3.34	0	0
AT5G09975	3.34	0	0	3.34	0	0
AT5G09976	3.34	0	0	3.34	0	0
AT5G09978	3.34	3.34	0	0	0	0
AT5G14780	3.34	0	0	0	0	3.34
AT5G16200	3.34	0	0	3.34	0	0
AT5G16210	3.34	0	0	0	0	3.34
AT5G18820	3.34	0	0	0	0	3.34
AT5G18830	3.34	0	0	3.34	0	0
AT5G19030	3.34	3.34	0	0	0	0
AT5G19040	3.34	0	0	0	3.34	0
AT5G23350	3.34	0	0	3.34	0	0
AT5G23360	3.34	0	3.34	0	0	0
AT5G40680	3.34	0	0	0	0	3.34
AT5G40690	3.34	0	0	3.34	0	0
AT5G47180	3.34	0	0	3.34	0	0
AT5G47190	3.34	0	0	0	0	3.34
AT5G47210	3.34	3.12	3.34	0	0	0
AT5G47220	3.34	0	0	3.34	0	0
AT5G58520	3.34	0	0	0	0	3.34
AT5G58530	3.34	0	3.34	0	0	0
AT5G60410	3.34	0	0	2.56	0	3.34
AT5G60430	3.34	0	0	3.34	0	0
AT5G60880	3.34	0	3.34	0	0	0
AT5G66200	3.34	0	0	3.34	0	2.78
AT5G66210	3.34	0	0	0	0	3.34
AT5G66880	3.34	0	0	3.34	0	0
AT5G67290	3.34	0	3.01	3.34	0	0
AT5G57740	3.28	3.28	0	0	0	0
AT5G57750	3.28	0	0	0	0	3.28
AT5G57760	3.28	0	0	3.28	0	0
AT5G57770	3.28	0	0	0	0	3.28
AT2G43018	3.24	3.24	0	0	0	0
AT2G43020	3.24	3.24	0	0	0	0
AT4G40020	3.24	0	3.24	0	0	2.67
AT4G40030	3.24	3.12	0	3.24	0	0
AT4G40040	3.24	0	0	3.12	0	3.24
AT4G40042	3.24	3.24	0	3.12	0	0
AT1G06380	3.23	0	0	0	0	3.23
AT1G06390	3.23	0	0	3.23	0	0
AT1G13280	3.23	0	0	0	3.23	0
AT1G13740	3.23	0	0	3.23	0	0
AT1G18720	3.23	0	0	0	0	3.23
AT1G30350	3.23	3.23	0	0	0	0
AT1G30360	3.23	0	3.23	3.01	0	0
AT1G32230	3.23	0	0	3.23	0	0
AT1G36060	3.23	0	0	0	3.23	0
AT1G44170	3.23	0	0	3.23	0	0
AT1G47870	3.23	3.23	0	0	0	0
AT1G49410	3.23	0	3.23	0	0	0
AT1G49420	3.23	0	0	0	3.23	0
AT1G49430	3.23	3.23	0	0	0	0
AT1G52615	3.23	0	0	0	3.23	0
AT1G52618	3.23	3.23	0	0	0	0
AT1G53560	3.23	0	0	3.23	0	0
AT1G53570	3.23	0	3.23	0	0	0
AT1G66145	3.23	3.23	0	0	0	0
AT1G66150	3.23	0	0	3.23	0	0
AT1G66600	3.23	0	0	3.23	0	0
AT1G70080	3.23	3.23	0	0	0	0
AT1G70090	3.23	0	0	3.23	0	2.78
AT1G70100	3.23	3.23	0	2.78	0	0
AT1G72090	3.23	0	0	0	0	3.23
AT1G72100	3.23	0	0	0	3.23	0
AT1G72170	3.23	3.23	0	0	0	0
AT2G03360	3.23	0	3.23	0	0	0
AT2G03370	3.23	0	0	0	3.23	0
AT2G03380	3.23	3.23	0	0	0	0
AT2G22070	3.23	0	0	0	0	3.23
AT2G22080	3.23	0	0	3.23	0	0
AT2G22088	3.23	0	3.23	0	0	0
AT2G26110	3.23	0	0	0	0	3.23
AT2G26120	3.23	0	3.23	0	0	0
AT2G29550	3.23	0	0	3.23	0	0
AT2G29560	3.23	0	0	3.23	0	0
AT2G36410	3.23	0	0	3.23	0	0
AT2G39010	3.23	0	0	0	3.23	0
AT2G39020	3.23	3.23	0	0	0	0
AT2G41380	3.23	3.23	0	0	0	0
AT2G42380	3.23	0	0	3.23	0	2.34
AT2G42388	3.23	0	3.23	0	0	0
AT2G42800	3.23	0	0	3.23	0	0
AT2G44500	3.23	0	0	3.23	0	0
AT2G46370	3.23	0	3.23	0	0	0
AT2G46510	3.23	0	3.23	0	0	0
AT2G47260	3.23	0	3.23	0	0	0
AT3G05930	3.23	3.23	0	0	0	0
AT3G06150	3.23	0	0	3.23	0	0
AT3G06160	3.23	0	0	0	3.23	0
AT3G07460	3.23	3.23	0	0	0	0
AT3G07470	3.23	0	0	3.23	0	0
AT3G07480	3.23	0	0	3.23	0	0
AT3G07490	3.23	3.23	0	0	0	0
AT3G10650	3.23	0	0	3.23	0	0
AT3G10660	3.23	0	0	0	0	3.23
AT3G11670	3.23	0	0	3.23	0	0
AT3G12120	3.23	0	0	3.23	2.56	0
AT3G12130	3.23	0	0	0	0	3.23
AT3G13310	3.23	0	0	3.23	0	0
AT3G13320	3.23	3.23	0	0	0	0
AT3G13594	3.23	0	0	0	0	3.23
AT3G15660	3.23	0	3.23	0	0	0
AT3G15670	3.23	0	0	0	3.23	0
AT3G29810	3.23	3.23	0	0	0	0
AT3G47210	3.23	0	3.23	0	0	0
AT3G48980	3.23	0	0	0	2.67	3.23
AT3G48990	3.23	0	0	0	0	3.23
AT3G53610	3.23	0	3.23	0	0	0
AT3G53620	3.23	0	0	3.23	0	0
AT3G58120	3.23	0	2.34	0	0	3.23
AT4G01860	3.23	0	0	3.23	0	0
AT4G01865	3.23	0	0	3.23	0	0
AT4G01870	3.23	0	0	0	0	3.23
AT4G11213	3.23	3.23	0	0	0	0
AT4G11216	3.23	3.23	0	0	0	0
AT4G11220	3.23	0	0	3.23	0	0
AT4G11230	3.23	0	0	0	0	3.23
AT4G11880	3.23	0	0	0	3.23	0
AT4G11890	3.23	0	3.23	0	0	0
AT4G13390	3.23	0	0	0	0	3.23
AT4G25520	3.23	0	0	3.23	0	0
AT4G25530	3.23	0	3.23	0	0	0
AT4G30350	3.23	0	3.12	2.56	0	3.23
AT4G34138	3.23	0	0	3.23	0	0
AT4G34140	3.23	0	0	3.23	0	0
AT4G35740	3.23	0	0	0	3.23	0
AT4G35750	3.23	0	0	0	0	3.23
[truncated: 677 more rows]

## Sheet: B
Figure 1-source data 1B. BZR1 target genes. ChIP-Seq experiment was performed using the BZR1p::BZR1-CFP transgenic seedlings grown in the dark for 5 days, and anti-YFP antibody. Data was analyzed as described in legend of Figure1-source data 1A.
Gene	max3kb1kb	u3000	u2000	u1000	d0	d1000
AT5G09810	33.67	33.67	3.01	0	0	0
AT3G48237	29.97	0	29.97	0	0	0
AT3G48240	29.97	0	0	0	29.97	0
AT5G47380	27.41	0	2.99	0	0	27.41
AT4G36780	25.33	0	0	25.33	0	11.28
AT4G36790	25.33	0	25.33	0	0	0
AT3G19390	24.3	24.3	0	0	0	0
AT3G63190	23.6	0	0	23.6	0	0
AT3G63200	23.6	0	0	23.6	0	0
AT1G75450	23.17	0	6.37	23.17	3.79	0
AT4G36380	22.98	0	3.51	0	22.98	13.71
AT4G01070	22.92	0	4.65	22.92	0	0
AT1G28630	22.77	0	22.77	0	0	0
AT4G01690	21.79	0	21.79	0	0	0
AT1G75388	21.13	0	21.13	4.23	3.11	0
AT1G75390	21.13	0	21.13	4.23	3.11	0
AT4G25620	20.4	0	20.4	4.52	3.43	0
AT4G25630	20.4	20.4	8.7	0	0	0
AT5G51330	19.92	0	0	19.92	0	0
AT5G51340	19.92	0	0	19.92	0	0
AT5G41590	19.08	0	19.08	2.99	0	0
AT5G41600	19.08	2.99	0	19.08	0	0
AT5G41605	19.08	19.08	0	0	0	0
AT3G60400	18.45	18.45	9.24	0	0	0
AT2G43910	18.42	0	0	18.42	0	0
AT2G46220	18.28	0	0	0	0	18.28
AT2G46225	18.28	0	0	18.28	0	0
AT2G05786	17.71	3.68	0	0	0	17.71
AT2G05790	17.71	0	0	17.71	3.68	0
AT2G28355	17.52	0	9.09	0	0	17.52
AT3G50660	17.37	3.67	6.74	17.37	7.53	0
AT3G23910	17.1	0	0	17.1	0	0
AT3G23920	17.1	0	17.1	0	0	0
AT3G23040	16.89	0	8.94	0	16.89	0
AT3G18700	16.74	16.74	0	4	0	0
AT3G18710	16.74	0	0	16.74	0	0
AT5G65910	16.71	16.71	0	0	0	0
AT5G65920	16.71	3.16	4	16.71	0	0
AT5G65925	16.71	16.71	4	3.16	0	0
AT5G65300	16.63	3.46	0	16.63	0	0
AT3G27390	16.59	0	16.59	0	0	0
AT3G27400	16.59	16.59	0	0	0	0
AT5G55910	16.5	16.5	4.02	3.62	0	0
AT5G55920	16.5	0	0	0	0	16.5
AT3G49810	16.43	0	10.12	16.43	0	0
AT1G54210	16.35	3.08	16.35	3.27	0	0
AT1G20900	16.27	0	16.27	0	0	0
AT1G75060	16.21	0	16.21	0	0	0
AT1G75070	16.21	0	0	0	0	16.21
AT1G75080	16.21	0	0	16.21	0	0
AT3G13720	16.13	16.13	0	3.04	3.56	0
AT3G13724	16.13	0	16.13	0	0	3.56
AT3G13730	16.13	0	0	0	16.13	0
AT5G38320	16.11	0	16.11	0	0	0
AT5G38330	16.11	4.55	0	0	16.11	0
AT5G38340	16.11	16.11	0	0	0	0
AT4G26210	15.85	15.85	0	0	0	0
AT3G12920	15.79	0	4.77	15.79	0	0
AT4G17453	15.48	0	0	0	15.48	3.14
AT4G17460	15.48	0	15.48	0	0	0
AT5G09440	15.4	15.4	3.66	0	0	0
AT3G21320	15.2	0	15.2	3.54	0	0
AT5G51780	15.15	0	0	15.15	0	0
AT2G44910	15.13	15.13	0	3.03	3.6	0
AT2G44920	15.13	15.13	6.14	10.4	0	0
AT3G60540	14.62	14.62	0	0	0	0
AT3G60550	14.62	0	14.62	3.36	0	0
AT5G65305	14.6	0	0	3.46	0	14.6
AT5G67290	14.39	0	14.39	3.13	0	3.01
AT5G67300	14.39	14.39	4.11	5.26	0	0
AT2G39855	14.29	0	0	0	0	14.29
AT2G39860	14.29	0	3.67	14.29	0	0
AT1G14860	14.21	0	0	4.74	3.32	14.21
AT3G58120	14.14	14.14	0	3.63	6.19	4.86
AT3G58130	14.14	14.14	0	0	0	0
AT3G13480	14	0	14	3.32	0	0
AT3G13490	14	4.25	0	0	0	14
AT4G30060	13.98	13.98	4.25	0	0	0
AT4G30064	13.98	0	0	4.25	13.98	0
AT4G30067	13.98	4.25	13.98	0	7.74	0
AT4G30070	13.98	13.98	7.74	0	0	0
AT5G17790	13.93	13.93	0	0	0	0
AT5G17795	13.93	0	13.87	0	13.93	0
AT5G17800	13.93	13.93	0	13.87	0	0
AT1G70300	13.82	0	13.82	0	0	0
AT1G68010	13.8	0	0	0	0	13.8
AT1G68020	13.8	0	0	13.8	0	0
AT1G63090	13.72	13.72	0	0	0	0
AT4G36370	13.71	0	0	0	13.71	0
AT5G05430	13.62	0	13.62	0	0	0
AT5G05435	13.62	0	0	0	0	13.62
AT5G05440	13.62	0	0	13.62	0	0
AT2G45070	13.5	13.5	0	4.04	0	0
AT2G45080	13.5	4.04	13.5	0	0	0
AT3G15500	13.41	0	0	4	0	13.41
AT4G16146	13.4	4.29	0	13.4	3.35	0
AT1G62520	13.39	13.39	0	3.53	5.23	0
AT1G10410	13.3	0	13.3	4.04	0	0
AT1G34245	13.22	0	0	4.63	13.22	2.99
AT1G20980	13.17	0	13.17	0	0	0
AT1G28360	13.14	0	7.3	0	0	13.14
AT2G47560	13.14	0	0	13.14	0	3.76
AT4G01245	13.12	7.05	13.12	0	0	0
AT4G01250	13.12	13.12	7.05	0	0	0
AT1G51170	12.92	4.5	0	7.04	12.92	0
AT3G04730	12.88	0	12.88	0	0	0
AT3G04732	12.88	0	0	0	0	12.88
AT3G04735	12.88	0	0	0	0	12.88
AT3G04740	12.88	0	12.88	0	0	0
AT1G72175	12.81	0	0	0	0	12.81
AT1G72180	12.81	12.81	0	0	0	0
AT2G42440	12.77	0	0	0	0	12.77
AT1G30330	12.76	12.76	5.49	0	0	10.6
AT5G24530	12.69	12.69	0	3.15	3.41	0
AT1G49780	12.67	12.67	4.04	6.06	0	0
AT3G29575	12.63	3.24	0	12.63	0	0
AT4G24972	12.58	0	5.72	12.58	0	0
AT5G61997	12.49	0	4.05	0	12.49	5
AT5G62000	12.49	12.49	0	4.05	0	0
AT2G15010	12.38	0	0	0	0	12.38
AT1G75490	12.37	0	0	12.37	4.42	0
AT2G22660	12.36	0	0	0	0	12.36
AT4G14560	12.32	12.32	0	0	0	0
AT4G17500	12.2	12.2	5.86	3.53	0	0
AT3G03620	12.16	0	0	12.16	0	0
AT3G03626	12.16	0	0	0	12.16	0
AT3G03630	12.16	0	0	0	0	12.16
AT1G21060	12.11	12.11	0	4.59	0	0
AT1G14910	12.07	12.07	4.22	0	0	0
AT2G43060	12.05	12.05	0	0	0	0
AT5G52430	12.01	0	0	12.01	0	0
AT5G52440	12.01	0	0	12.01	0	0
AT1G30110	11.89	0	0	11.89	0	0
AT2G44650	11.85	11.85	0	0	0	0
AT2G44660	11.85	3.63	4.78	11.85	0	0
AT2G44670	11.85	0	11.85	4.78	0	0
AT4G31380	11.78	4.67	4.51	4.54	3.58	11.78
AT4G31390	11.78	3.58	11.78	0	0	0
AT2G18720	11.73	11.73	3.82	0	0	0
AT2G18730	11.73	0	0	3.82	11.73	0
AT4G39390	11.64	0	0	0	0	11.64
AT2G35200	11.57	0	0	0	0	11.57
AT2G35208	11.57	0	0	11.57	0	0
AT2G35210	11.57	0	0	11.57	0	0
AT1G63720	11.54	0	0	11.54	0	0
AT1G69570	11.51	0	11.51	0	3.59	0
AT5G63790	11.46	0	0	11.46	0	0
AT5G63800	11.46	0	11.46	0	3.81	0
AT4G17695	11.44	0	3.28	3.79	11.44	4.05
AT4G27410	11.36	0	8.28	11.36	0	0
AT4G27415	11.36	0	0	11.36	0	0
AT3G50790	11.3	3.11	11.3	0	0	0
AT3G50800	11.3	0	3.11	11.3	0	0
AT2G28690	11.29	11.29	0	0	0	0
AT4G36770	11.28	0	0	11.28	0	0
AT1G03790	11.21	0	0	4	0	11.21
AT1G03800	11.21	0	0	5.4	0	11.21
AT1G03810	11.21	0	11.21	5.4	0	0
AT3G13510	11.21	0	4.25	11.21	0	0
AT5G49680	11.13	4.92	0	11.13	0	0
AT2G02710	11.1	0	0	11.1	0	0
AT2G02720	11.1	0	11.1	0	0	0
AT2G33360	11.1	0	11.1	0	0	0
AT3G51360	11.1	11.1	0	0	0	3.92
AT3G51370	11.1	0	0	11.1	0	0
AT5G02190	11.08	0	0	3.69	0	11.08
AT5G02200	11.08	0	0	11.08	0	0
AT1G62950	11.07	0	0	11.07	0	0
AT3G44610	11.02	0	0	0	11.02	0
AT2G46660	11.01	4.13	0	0	11.01	0
AT1G69252	11	0	0	0	0	11
AT1G69260	11	0	11	7.88	0	0
AT2G23170	10.97	10.97	0	5.03	0	0
AT2G23171	10.97	10.97	0	5.03	0	0
AT3G50060	10.86	10.86	4.3	4.9	0	0
AT4G10380	10.86	0	0	10.86	0	0
AT2G23760	10.84	10.84	0	0	0	3.53
AT2G45050	10.84	10.84	0	0	0	0
AT5G66080	10.8	0	0	10.8	0	0
AT5G66090	10.8	0	0	10.8	0	0
AT5G66100	10.8	10.8	0	0	0	0
AT4G04330	10.78	0	0	10.78	0	0
AT5G54390	10.76	0	0	10.76	0	0
AT3G20830	10.75	0	6.33	0	10.75	0
AT5G61780	10.71	0	0	10.71	0	0
AT5G08790	10.66	0	3.52	10.66	0	0
AT4G33800	10.61	0	10.61	3.62	0	0
AT4G33810	10.61	0	0	0	0	10.61
AT5G04330	10.6	0	0	10.6	6.46	0
AT5G17880	10.6	0	10.6	0	0	0
AT5G17890	10.6	10.6	0	0	0	0
AT4G05100	10.52	0	0	6.32	0	10.52
AT5G14220	10.51	10.51	0	0	0	0
AT5G14230	10.51	0	10.51	0	0	0
AT4G17810	10.46	10.46	0	0	0	0
AT3G61460	10.38	7.83	4.04	10.38	0	0
AT5G54520	10.38	0	10.38	0	0	0
AT5G54530	10.38	0	10.38	0	0	0
AT4G11820	10.35	0	4.97	0	10.35	0
AT3G02570	10.33	0	5.06	10.33	0	0
AT3G02580	10.33	0	0	10.33	0	0
AT1G17400	10.29	0	10.29	0	0	0
AT3G23240	10.26	4.01	10.26	0	0	0
AT5G55180	10.26	0	0	0	10.26	0
AT5G55190	10.26	0	10.26	0	0	0
AT3G19020	10.23	10.23	0	0	0	0
AT3G19030	10.23	0	0	10.23	0	0
AT3G19035	10.23	0	10.23	0	0	0
AT1G10560	10.22	3.57	0	10.22	0	3.32
AT1G29630	10.2	0	0	0	0	10.2
AT2G45200	10.17	0	10.17	0	0	0
AT2G45210	10.17	0	0	10.17	0	0
AT3G49820	10.12	10.12	0	0	0	0
AT1G80840	10.11	0	10.11	4.42	0	0
AT4G02130	10.11	0	10.11	0	3.21	0
AT3G26830	10.1	0	10.1	0	0	0
AT5G64250	10.1	0	10.1	0	0	0
AT5G64260	10.1	10.1	4.3	0	4.73	0
AT4G16370	10	0	3.03	10	0	0
AT5G01849	9.96	9.96	0	5.45	0	0
AT5G01850	9.96	9.96	0	5.45	0	0
AT4G14130	9.95	0	9.95	0	0	0
AT2G25460	9.88	0	0	9.88	3.43	0
AT2G25470	9.88	9.88	0	0	0	0
AT3G58860	9.87	0	0	0	0	9.87
AT2G17070	9.84	0	9.84	0	0	3.11
AT2G17080	9.84	0	0	0	0	9.84
AT1G75440	9.83	0	0	9.83	0	3.79
AT3G05890	9.79	0	9.79	0	0	0
AT3G05905	9.79	0	9.79	0	3.1	0
AT1G09260	9.77	7.48	9.77	0	0	0
AT1G09270	9.77	9.77	0	0	0	0
AT4G37810	9.77	3.53	0	0	6.06	9.77
AT2G02070	9.75	0	0	3.21	9.75	8.94
AT3G50700	9.75	0	0	0	0	9.75
AT4G28530	9.75	6.36	0	0	9.75	0
AT4G36730	9.75	0	0	9.75	0	0
AT5G19257	9.75	0	9.75	0	0	0
AT3G17120	9.74	0	0	9.74	4.45	7.75
AT3G14880	9.73	0	0	3.65	0	9.73
AT3G14890	9.73	3.65	0	9.73	0	0
AT3G23635	9.73	9.73	4.09	0	0	0
AT3G23637	9.73	0	0	9.73	0	0
AT3G23640	9.73	0	9.73	0	0	0
AT3G28860	9.68	4	0	0	9.68	0
AT1G49500	9.63	3.21	9.63	3.25	0	3.31
AT1G06400	9.56	0	0	9.56	0	0
AT1G06410	9.56	0	9.56	0	0	0
AT1G22190	9.51	3.82	9.51	4.44	0	0
AT5G18830	9.51	0	0	0	0	9.51
AT5G18840	9.51	0	9.51	0	0	0
AT2G42920	9.48	0	0	0	0	9.48
AT2G42930	9.48	9.48	0	0	0	0
AT2G42940	9.48	0	0	9.48	0	0
AT2G42950	9.48	0	0	9.48	0	0
AT1G26270	9.47	9.47	0	3.46	0	0
AT1G55610	9.47	0	9.47	0	0	0
AT1G55615	9.47	0	0	0	9.47	0
AT2G23770	9.47	0	0	0	0	9.47
AT5G01730	9.46	9.46	0	0	0	4.17
AT5G01734	9.46	0	0	9.46	0	0
AT5G01740	9.46	0	0	9.46	0	0
AT1G74929	9.41	0	9.41	0	0	0
AT1G74930	9.41	0	0	0	0	9.41
AT1G74940	9.41	0	0	9.41	0	3.44
AT3G48460	9.41	3.7	9.41	0	0	0
AT5G12040	9.37	0	0	0	0	9.37
AT5G12043	9.37	0	0	0	0	9.37
AT5G12050	9.37	0	9.37	0	0	0
AT2G03070	9.36	0	0	0	0	9.36
AT1G60190	9.33	0	0	9.33	0	0
AT1G14720	9.29	4.37	0	9.29	0	0
AT4G39403	9.29	4.89	8.79	9.29	0	0
AT4G39404	9.29	0	4.89	9.29	0	0
AT5G54590	9.28	0	9.28	3.02	0	0
AT1G66553	9.26	0	0	0	0	9.26
AT1G66560	9.26	9.26	0	0	0	0
AT3G04420	9.25	0	3.1	3.37	0	9.25
AT3G04430	9.25	0	0	0	0	9.25
AT3G50630	9.23	0	9.23	0	0	0
AT4G19700	9.19	0	9.19	3.51	0	3.44
AT5G03370	9.18	0	9.18	0	0	0
AT5G27030	9.16	0	0	9.16	0	0
AT1G22310	9.12	0	9.12	0	0	0
AT1G22320	9.12	0	0	9.12	0	0
AT1G22330	9.12	0	9.12	0	5.56	0
AT1G01140	9.11	0	0	9.11	0	0
AT1G26916	9.1	0	9.1	3.85	4.89	0
AT2G27310	9.1	0	0	9.1	0	0
AT2G46510	9.1	3.32	4.67	9.1	0	0
AT2G46520	9.1	9.1	4.67	3.32	0	5.43
AT1G07670	9.08	0	0	9.08	0	0
AT1G07680	9.08	0	0	9.08	0	3.25
AT2G34185	9.08	0	4.05	0	0	9.08
AT2G34186	9.08	0	0	9.08	0	0
AT2G34190	9.08	0	0	9.08	0	0
AT1G02340	9.07	0	9.07	3.72	0	0
AT1G02350	9.07	0	3.72	9.07	0	6.34
AT1G35560	9.07	0	5.61	9.07	3.95	0
AT1G76160	9.07	0	0	9.07	0	0
AT5G47370	9.02	0	9.02	5.54	0	0
AT5G45100	9.01	9.01	0	8.42	0	0
AT2G28140	8.98	0	0	8.98	0	0
AT4G39070	8.96	0	8.96	3.18	4.4	0
AT4G39080	8.96	4.4	3.21	8.96	0	0
AT2G30760	8.95	0	0	0	8.95	0
AT2G30766	8.95	0	8.95	2.99	0	0
AT3G23030	8.94	8.94	6.91	7.22	0	0
AT3G53720	8.93	0	0	8.93	0	0
AT5G08139	8.91	0	8.91	3.83	0	0
AT1G50280	8.83	0	8.83	0	5.46	0
AT1G50290	8.83	0	0	0	0	8.83
AT2G45350	8.83	8.83	0	0	0	0
AT2G45360	8.83	0	0	0	8.83	0
AT2G45380	8.83	0	0	0	0	8.83
AT3G44320	8.83	0	3.65	8.83	0	0
AT4G37445	8.83	8.83	0	0	0	0
AT4G37450	8.83	0	0	8.83	0	0
AT4G37460	8.83	0	0	0	0	8.83
AT5G02530	8.8	0	3.03	8.8	0	0
AT5G02540	8.8	8.8	4.59	3.03	0	0
AT2G18090	8.77	0	0	8.77	0	0
AT2G45670	8.77	8.77	0	3.14	0	3.3
AT2G45680	8.77	0	0	5.23	8.77	0
AT2G45685	8.77	3.14	0	8.77	5.23	3.56
AT1G18710	8.75	0	0	0	0	8.75
AT3G15095	8.74	0	3.37	8.74	3.14	0
AT1G03840	8.73	0	0	8.73	0	0
AT1G19900	8.73	8.73	3.51	0	0	0
AT1G19910	8.73	8.73	0	0	0	0
AT1G30090	8.73	3.01	8.73	0	0	0
AT3G15880	8.73	0	4.68	0	8.73	0
AT3G15890	8.73	8.73	0	4.68	0	0
AT5G65280	8.73	0	0	8.73	0	0
AT5G65290	8.73	0	8.73	0	0	0
AT4G25631	8.7	8.7	0	0	0	0
AT3G16565	8.68	8.68	3.88	0	0	0
AT3G16570	8.68	0	0	3.88	6.15	8.68
AT3G04920	8.63	4.74	0	8.63	0	0
AT1G70944	8.61	0	8.61	0	0	5.43
AT1G70950	8.61	8.61	0	0	0	0
AT1G76210	8.61	8.61	0	5.66	0	0
AT1G76220	8.61	0	0	8.61	0	0
AT2G42870	8.61	5.21	8.61	3.16	0	0
AT1G77740	8.6	8.6	0	0	0	0
AT1G04370	8.59	0	3.52	8.59	0	0
AT5G05180	8.59	0	0	0	0	8.59
AT5G05190	8.59	8.59	0	0	0	0
AT3G08020	8.58	0	8.58	0	0	0
AT3G08030	8.58	0	8.58	0	0	0
AT4G36900	8.58	8.58	0	0	0	0
AT5G05700	8.58	0	0	0	3.11	8.58
AT5G15740	8.58	8.58	0	0	0	0
AT5G15750	8.58	0	0	8.58	0	0
AT5G15760	8.58	8.58	0	0	0	0
AT5G27920	8.58	4.49	0	8.58	0	0
AT4G37540	8.57	4.15	8.57	3.17	3.37	0
AT4G37550	8.57	3.37	8.57	4.15	0	0
AT3G54760	8.53	0	8.53	0	0	0
AT3G54770	8.53	0	0	0	8.53	0
AT3G49350	8.52	8.52	0	0	0	0
AT3G49360	8.52	0	0	0	0	8.52
AT3G26932	8.5	0	0	0	0	8.5
AT3G26934	8.5	0	8.5	0	0	0
AT3G60680	8.49	0	0	0	0	8.49
AT3G60690	8.49	8.49	4.24	7.34	0	0
AT5G14900	8.45	3.44	8.45	0	0	0
AT5G14910	8.45	0	0	0	0	8.45
AT5G14920	8.45	0	0	8.45	3.55	4.04
AT1G35830	8.43	0	0	0	0	8.43
AT1G06990	8.42	0	8.42	0	0	0
AT3G23050	8.42	0	0	3.01	8.42	0
AT4G16970	8.42	0	0	8.42	0	0
AT4G16980	8.42	0	0	8.42	0	0
AT1G75500	8.4	7.3	8.4	0	4.04	0
AT4G36170	8.4	0	0	0	8.4	0
AT4G36180	8.4	0	0	0	0	8.4
AT4G29700	8.39	0	0	8.39	0	0
AT5G52882	8.32	8.32	0	0	0	0
AT1G21050	8.31	0	0	8.31	0	0
AT5G23860	8.3	0	0	8.3	0	0
AT1G23080	8.29	0	0	0	8.29	0
AT4G39400	8.29	0	8.29	3.42	0	0
AT5G20140	8.28	0	8.28	0	0	0
AT5G20150	8.28	0	0	8.28	0	0
AT3G60220	8.26	0	8.26	0	0	0
AT1G75750	8.25	8.25	0	0	0	0
AT3G02140	8.25	0	0	8.25	0	0
AT3G50337	8.25	3.73	8.25	0	3.07	0
AT3G50340	8.25	3.08	0	0	3.73	8.25
AT4G01400	8.25	3.35	3.03	8.25	0	0
AT4G01410	8.25	0	0	8.25	3.03	3.35
AT2G01410	8.22	3.81	8.22	0	0	0
AT2G28500	8.22	0	0	0	8.22	3.36
AT3G07350	8.22	0	5.04	0	6.54	8.22
AT3G47430	8.22	8.22	0	0	0	0
AT2G44500	8.2	0	5.68	8.2	0	0
AT2G46970	8.2	0	8.2	3.15	0	0
AT2G46980	8.2	0	0	0	0	8.2
AT1G68100	8.18	0	0	0	0	8.18
AT1G68110	8.18	0	0	8.18	0	0
AT3G62090	8.18	3.25	0	8.18	0	0
AT3G62630	8.17	5.59	0	3.77	0	8.17
AT1G12420	8.14	0	8.14	0	0	0
AT1G12423	8.14	0	3.53	0	0	8.14
AT1G03600	8.1	0	0	5.24	0	8.1
AT1G03610	8.1	5.24	0	8.1	0	0
AT3G23210	8.1	8.1	0	0	0	0
AT3G23220	8.1	0	0	8.1	0	0
AT5G03140	8.1	5.4	0	8.1	0	0
AT3G63003	8.08	8.08	0	0	0	0
AT3G63006	8.08	8.08	0	0	0	0
AT3G63010	8.08	0	8.08	3.71	3.81	4.2
AT4G22810	8.08	4.03	0	3.03	3.34	8.08
AT1G79110	8.07	4.14	0	0	8.07	5.98
AT3G13970	8.07	0	8.07	3.96	0	0
AT5G49100	8.07	0	0	3.54	8.07	0
AT5G49110	8.07	0	8.07	3.54	0	0
AT5G23220	8.06	0	8.06	0	0	0
AT3G07310	8.05	8.05	4.66	3.23	0	0
AT3G07320	8.05	0	0	3.02	8.05	0
AT2G36050	8.04	5.91	8.04	7.06	0	0
AT2G36053	8.04	0	7.06	8.04	0	5.91
AT1G55360	8.01	3.12	8.01	0	0	0
AT1G55090	8	0	0	0	0	8
AT1G55110	8	0	0	0	4.09	8
AT5G15580	7.98	0	3.61	7.98	0	0
AT5G15581	7.98	0	0	0	0	7.98
AT4G30180	7.96	4.27	3.16	7.96	0	4.29
AT5G20700	7.96	0	7.96	0	0	3.5
AT5G20710	7.96	7.96	6.03	0	0	0
AT1G65920	7.94	0	7.94	0	0	0
AT1G69690	7.92	7.92	0	0	4.19	0
AT5G05690	7.91	0	0	7.91	3.64	0
AT4G39800	7.9	0	0	7.9	0	0
AT3G62660	7.89	0	0	0	0	7.89
AT3G62670	7.89	0	0	0	0	7.89
AT4G32480	7.87	0	7.87	4.92	0	0
AT4G36120	7.87	0	0	0	0	7.87
AT5G60680	7.87	0	7.87	4.65	0	0
AT5G65310	7.87	0	7.87	0	6.21	3.73
AT4G03130	7.84	0	7.84	0	0	0
AT4G03140	7.84	0	0	7.84	0	0
AT3G61470	7.83	4.04	7.83	4.35	0	0
AT1G48100	7.82	0	0	0	7.82	0
AT2G42280	7.82	7.82	0	3.91	0	0
AT3G13810	7.82	5.99	0	0	7.82	6.57
AT3G22380	7.82	5.6	4.79	7.82	0	3.34
AT1G75040	7.81	0	0	0	0	7.81
AT1G75050	7.81	0	0	7.81	0	0
AT1G13260	7.8	4.94	5.01	7.8	0	0
AT4G25433	7.8	0	0	7.8	0	0
AT1G21900	7.79	7.79	0	0	0	0
AT1G21910	7.79	3.84	7.79	4.14	0	0
AT5G15254	7.78	7.78	0	0	0	0
AT5G15260	7.78	0	7.78	0	0	0
AT5G15265	7.78	0	0	7.78	0	0
AT5G15270	7.78	7.78	0	0	0	0
AT4G29090	7.77	7.77	0	3.87	0	0
AT3G23820	7.76	3.53	7.76	0	0	0
AT5G38970	7.76	0	0	0	7.76	3
AT3G17130	7.75	0	0	0	0	7.75
AT1G70290	7.74	0	7.74	0	0	0
AT1G06350	7.72	0	7.72	0	0	0
AT1G06360	7.72	0	0	5.98	0	7.72
AT1G72460	7.72	6.5	0	3.21	0	7.72
AT1G72470	7.72	0	7.72	6.95	4.03	0
AT1G32190	7.71	0	0	3.21	7.71	0
AT4G36220	7.71	0	0	0	7.71	0
AT2G28120	7.69	0	0	0	0	7.69
AT2G28130	7.69	0	0	7.69	0	0
AT3G04560	7.67	0	7.67	0	0	0
AT3G04570	7.67	0	0	7.67	0	0
AT3G13380	7.66	7.66	0	0	0	0
AT4G35500	7.66	3.73	0	0	0	7.66
AT4G35510	7.66	0	0	0	0	7.66
AT5G24930	7.64	0	7.64	0	0	0
AT1G02660	7.63	0	0	7.63	0	0
AT1G02670	7.63	0	0	7.63	0	0
AT4G13390	7.63	0	0	0	0	7.63
AT4G13395	7.63	0	4.2	7.63	0	0
AT5G52060	7.62	4.02	0	7.62	0	3.2
AT3G19670	7.6	7.6	0	0	0	5.01
AT3G19680	7.6	0	7.6	5.76	5.72	4.05
AT4G30080	7.59	0	6.05	7.59	0	6.04
AT3G21090	7.58	7.58	0	3.37	0	0
AT3G21100	7.58	0	7.58	0	0	0
AT5G53950	7.58	0	0	7.58	0	0
AT4G16670	7.56	3.79	0	7.56	0	0
AT1G46408	7.55	7.55	0	0	0	0
AT1G71870	7.55	7.55	0	0	0	0
AT5G22580	7.55	0	0	7.55	0	0
AT5G22590	7.55	0	7.55	0	0	3.32
AT4G17670	7.54	0	7.54	4.35	0	0
AT3G60160	7.53	7.53	0	0	0	0
AT5G66590	7.53	0	7.13	4.34	7.53	0
AT5G66600	7.53	0	0	0	0	7.53
AT1G22460	7.5	0	7.5	0	0	0
AT1G22470	7.5	0	0	0	0	7.5
AT1G27720	7.5	3.03	7.5	0	0	0
AT1G27730	7.5	3.41	3.37	7.5	0	0
AT1G70210	7.5	0	0	4.81	7.5	0
AT2G02170	7.49	0	7.49	3.82	0	0
AT2G02180	7.49	0	7.49	0	0	0
AT4G27870	7.49	0	3.58	7.49	0	0
AT1G09250	7.48	0	0	0	0	7.48
AT2G28840	7.47	7.47	0	0	0	0
AT2G43018	7.47	3.03	5.33	7.47	0	0
AT2G43020	7.47	3.03	5.33	7.47	0	0
AT3G28193	7.47	0	7.47	3.12	0	0
AT3G28200	7.47	3.12	7.47	4.04	0	0
AT3G29370	7.47	0	7.24	7.47	0	0
AT3G29375	7.47	7.47	0	0	0	0
AT4G25480	7.46	7.46	0	3.78	4.05	4.05
AT4G25490	7.46	0	0	4.85	0	7.46
AT5G02260	7.45	3.27	7.45	0	0	0
AT2G15620	7.44	0	7.44	0	0	0
AT2G28510	7.44	2.99	7.44	0	0	0
AT5G03760	7.44	4.43	0	3.2	7.44	0
AT3G23630	7.43	0	3.2	3.41	0	7.43
AT3G56710	7.42	5.01	7.42	0	0	0
AT3G56720	7.42	0	7.42	0	0	0
AT4G05010	7.41	0	0	0	0	7.41
AT4G05018	7.41	7.41	0	0	0	4.48
AT5G62350	7.41	0	3.89	0	0	7.41
AT5G62360	7.41	4.69	7.41	0	0	0
AT3G05500	7.4	0	0	7.4	0	0
AT3G05510	7.4	0	7.4	0	0	0
AT1G05300	7.38	0	0	7.38	0	0
AT1G21970	7.38	7.38	0	0	0	0
AT1G21975	7.38	0	0	7.38	0	4.56
AT1G21980	7.38	7.38	4.56	3.57	0	0
AT1G26973	7.38	7.38	0	0	0	0
AT1G26976	7.38	0	0	0	0	7.38
AT1G26985	7.38	0	7.38	0	0	0
AT1G45170	7.38	0	0	7.38	0	0
AT1G45180	7.38	0	0	7.38	0	0
AT1G50450	7.38	0	3.03	7.38	0	0
AT1G50460	7.38	7.38	0	0	0	0
AT3G06125	7.38	0	0	3.18	7.38	0
AT1G64460	7.35	7.35	0	0	0	0
AT1G64470	7.35	0	7.35	0	0	0
AT1G64480	7.35	0	0	0	4.34	7.35
AT5G62650	7.33	7.33	0	0	0	0
AT5G62660	7.33	0	7.33	0	0	0
AT5G62670	7.33	0	0	7.33	0	0
AT1G14920	7.32	5.48	7.32	0	0	0
AT2G25490	7.31	0	7.31	0	0	0
AT3G17860	7.31	0	3.35	7.31	5.91	0
AT5G57040	7.31	0	4.22	7.31	0	0
AT5G57050	7.31	0	7.31	4.22	0	0
AT1G28350	7.3	0	0	0	0	7.3
AT1G14690	7.28	7.28	4.05	0	0	0
AT1G14700	7.28	0	4.05	7.28	0	3.09
AT4G21440	7.28	0	0	0	0	7.28
AT2G30520	7.27	0	7.27	0	0	0
AT2G30530	7.27	7.27	0	0	0	0
AT5G21105	7.27	3.19	0	3.03	7.27	0
AT5G35407	7.27	0	0	0	0	7.27
AT5G35735	7.27	7.27	0	0	0	0
AT5G35737	7.27	0	7.27	0	0	0
AT5G24470	7.25	0	0	7.25	0	0
AT1G69440	7.24	0	3.52	7.24	0	0
AT3G45530	7.24	0	0	7.24	3	0
AT5G15940	7.23	0	0	0	0	7.23
AT5G15948	7.23	0	0	7.23	0	0
AT5G15950	7.23	0	0	7.23	0	0
AT2G23320	7.22	0	3.3	0	0	7.22
AT2G23321	7.22	3.3	0	0	0	7.22
AT3G23020	7.22	7.22	0	0	0	0
AT1G52185	7.2	7.2	5.04	0	0	3.66
AT1G52190	7.2	5.04	7.2	0	0	0
AT5G14390	7.2	7.2	0	6.03	0	0
AT5G14400	7.2	0	7.2	0	0	0
AT5G61990	7.19	0	7.19	0	0	0
AT1G69780	7.18	4.55	0	0	4.21	7.18
AT3G06080	7.18	0	3.91	7.18	0	0
AT3G06090	7.18	7.18	3.91	0	0	0
AT4G13710	7.18	0	0	0	7.18	0
AT5G14350	7.17	7.17	0	6.23	0	0
AT5G14360	7.17	0	6.23	7.17	0	0
AT1G05700	7.15	0	0	0	0	7.15
AT1G05710	7.15	0	7.15	0	0	0
AT2G44070	7.15	0	7.15	0	0	0
AT2G44080	7.15	7.15	0	4.11	0	0
AT2G20670	7.14	0	0	7.14	0	0
AT5G65130	7.14	3.25	0	0	0	7.14
AT5G65140	7.14	3.03	0	4.09	0	7.14
AT5G66580	7.13	0	0	7.13	0	4.34
AT1G74500	7.09	0	7.09	0	0	0
AT4G34760	7.08	0	0	7.08	0	5.47
AT5G11530	7.08	7.08	0	6.18	0	0
AT2G17220	7.07	7.07	0	0	0	0
AT5G63650	7.07	0	3.09	7.07	0	0
AT5G63660	7.07	0	7.07	3.09	0	0
AT1G64561	7.06	7.06	0	0	0	0
AT1G64563	7.06	0	0	7.06	0	0
AT1G64570	7.06	0	7.06	0	0	0
AT2G24850	7.06	0	0	7.06	0	3.01
AT3G51400	7.06	0	6.51	7.06	0	0
AT4G29780	7.06	0	0	7.06	0	0
AT5G40470	7.06	0	0	0	0	7.06
AT5G66610	7.05	0	0	0	0	7.05
AT5G66620	7.05	0	0	7.05	0	0
AT2G01500	7.04	0	0	7.04	0	3.81
AT2G01680	7.04	0	4.34	7.04	0	0
AT2G43290	7.04	0	7.04	0	0	0
AT2G43310	7.04	7.04	0	3.08	0	0
AT5G57140	7.04	0	0	0	0	7.04
AT5G57150	7.04	0	0	3.66	7.04	0
AT1G33060	7.03	0	0	7.03	0	0
AT1G18735	7.02	3.52	7.02	6.77	0	3.01
AT1G18740	7.02	0	6.77	7.02	3.52	0
AT3G57990	7.02	3.45	7.02	0	0	0
AT3G58000	7.02	0	7.02	0	0	0
AT5G45580	7.02	0	7.02	0	0	0
AT5G45590	7.02	0	0	0	0	7.02
AT1G69030	7.01	7.01	0	0	0	0
AT2G40008	7.01	0	7.01	4.17	0	0
AT4G24110	6.98	0	0	6.98	0	0
AT5G64650	6.98	6.98	0	0	0	0
AT5G64660	6.98	4.82	3.31	6.98	0	0
AT3G27170	6.97	0	6.97	4.47	0	0
AT3G47940	6.97	0	6.97	0	0	0
AT3G47950	6.97	0	6.97	0	0	0
AT5G14700	6.97	6.97	0	4.34	0	3.11
AT5G14710	6.97	4.34	0	6.97	0	0
AT1G22360	6.96	6.96	0	6.78	3.17	0
AT1G22370	6.96	0	0	6.96	0	6.78
AT1G22380	6.96	0	0	0	0	6.96
AT1G24260	6.96	6.96	0	3.63	0	0
AT1G24265	6.96	0	6.96	0	0	0
AT1G44170	6.95	0	0	6.95	0	0
AT5G06090	6.94	0	0	6.94	0	4.02
AT1G17500	6.93	5.5	6.93	3	0	0
AT1G73530	6.92	0	6.92	0	0	0
AT1G73540	6.92	0	0	6.92	0	0
AT1G73550	6.92	0	0	0	0	6.92
AT4G04745	6.91	6.91	0	0	0	3.84
AT4G04750	6.91	6.91	0	0	0	0
AT4G21920	6.91	4.12	6.91	0	0	0
AT4G21926	6.91	0	0	3.11	4.12	6.91
AT4G21930	6.91	0	6.91	4.12	3.11	0
AT4G21940	6.91	6.91	4.12	3.11	0	0
AT1G19310	6.9	0	3.62	6.9	0	3.65
AT1G19320	6.9	0	6.9	3.62	0	0
AT2G45470	6.9	0	0	6.9	0	0
AT2G45480	6.9	0	0	6.9	0	0
AT3G17800	6.9	0	0	6.9	0	0
AT3G17810	6.9	0	0	6.9	0	0
AT4G31800	6.9	0	6.9	4.16	0	0
AT3G60090	6.88	0	3.81	6.88	0	0
AT3G60100	6.88	6.88	0	0	0	3.14
AT4G08039	6.88	0	0	6.88	0	3.14
AT4G08040	6.88	3.14	0	6.88	0	0
AT3G14590	6.86	0	0	6.86	0	0
AT3G14595	6.86	0	0	6.86	0	0
AT3G14600	6.86	6.86	0	0	0	0
AT4G37790	6.86	4.46	0	0	0	6.86
AT1G33230	6.85	0	0	0	0	6.85
AT1G33240	6.85	3.4	0	3.18	0	6.85
AT1G16750	6.8	0	0	6.8	0	0
AT1G16760	6.8	6.8	0	0	0	0
AT3G25870	6.8	6.8	0	0	0	0
AT5G08710	6.8	0	6.8	0	0	0
AT5G08717	6.8	0	0	6.8	0	0
AT3G06750	6.79	4.62	0	3.99	0	6.79
AT4G37850	6.79	0	0	6.79	0	0
AT5G64667	6.79	6.79	0	0	0	0
AT2G16430	6.78	3.01	0	6.78	0	0
AT4G19520	6.78	6.78	0	0	0	0
AT4G19530	6.78	6.78	3.98	0	0	0
AT1G18720	6.77	6.77	3.01	0	3.04	3.37
AT1G18730	6.77	0	3.04	0	3.01	6.77
AT4G25260	6.77	0	0	6.77	0	0
AT4G25270	6.77	3.15	0	0	0	6.77
AT2G38120	6.75	0	0	3	0	6.75
AT3G27960	6.75	0	6.75	0	0	0
AT1G20190	6.73	0	0	6.73	0	0
AT5G52280	6.73	0	0	6.73	0	0
AT2G21910	6.72	0	0	6.72	0	0
AT2G34810	6.72	0	0	0	0	6.72
AT2G34820	6.72	6.72	0	0	0	0
AT1G29270	6.71	0	6.71	3.37	0	0
AT1G11580	6.7	5.69	0	6.7	0	0
AT1G53830	6.7	0	4.82	6.7	0	3.26
AT1G61350	6.7	0	6.7	0	0	3.44
AT1G61750	6.7	0	0	6.7	0	0
AT1G61760	6.7	0	0	0	0	6.7
AT2G12900	6.7	0	0	0	0	6.7
AT2G12905	6.7	0	0	6.7	0	0
AT5G42800	6.7	0	0	6.7	0	0
AT5G42810	6.7	0	0	6.7	0	0
AT5G57710	6.7	0	3.35	6.7	0	4.67
AT2G37440	6.69	0	0	0	6.69	5.38
AT2G37450	6.69	0	0	0	0	6.69
AT3G21270	6.69	0	6.69	0	0	0
AT1G28440	6.68	0	0	0	0	6.68
AT1G28450	6.68	6.68	0	0	0	0
AT5G17850	6.68	0	0	0	0	6.68
AT5G17860	6.68	0	4.01	3.43	3.03	6.68
AT4G25450	6.67	6.67	0	0	0	0
AT4G25470	6.67	4.05	4.05	6.67	0	0
AT3G51950	6.66	0	0	6.66	4.79	0
AT3G51960	6.66	0	0	0	0	6.66
AT3G51970	6.66	6.66	0	0	0	0
AT5G07020	6.66	6.66	0	0	0	0
AT5G07030	6.66	0	0	0	6.66	0
AT5G58550	6.66	0	6.66	0	0	0
AT5G58560	6.66	0	0	6.66	0	0
AT3G08760	6.65	0	6.65	0	0	0
AT3G08762	6.65	0	0	3.4	6.65	0
AT5G56220	6.65	0	0	4.5	0	6.65
AT5G56230	6.65	0	0	0	0	6.65
AT1G07970	6.63	6.63	0	0	0	0
AT1G07980	6.63	0	0	6.63	0	0
AT1G07985	6.63	0	0	6.63	0	0
AT1G07990	6.63	0	6.63	0	0	0
AT2G23755	6.63	4.78	0	6.63	0	0
AT1G67265	6.62	0	3.89	4.82	0	6.62
AT1G14590	6.61	0	4.78	0	0	6.61
AT1G72240	6.61	3.86	0	0	0	6.61
AT1G72250	6.61	0	6.61	0	0	0
AT1G02400	6.6	0	3.43	0	6.6	0
AT1G02410	6.6	6.6	0	0	0	0
AT2G29450	6.6	0	0	6.6	0	0
AT2G29452	6.6	0	0	0	6.6	0
AT2G29460	6.6	0	0	0	0	6.6
AT2G41220	6.6	0	0	3.35	0	6.6
AT5G23350	6.6	0	0	6.6	0	0
AT5G23360	6.6	0	6.6	0	0	0
AT1G25230	6.58	0	0	6.58	0	0
AT1G25240	6.58	6.58	0	0	0	3.46
AT2G03240	6.58	0	6.58	0	0	0
AT3G52370	6.58	6.58	0	0	0	0
AT5G52520	6.58	0	0	6.58	0	0
AT3G13820	6.57	0	6.57	0	0	0
AT3G16450	6.57	0	0	0	0	6.57
AT3G16460	6.57	0	6.57	3.76	0	0
AT1G09960	6.56	3.09	3.52	0	0	6.56
AT2G22770	6.56	0	6.56	0	3	0
AT1G74670	6.55	0	0	6.55	4.74	0
AT2G30990	6.55	0	3.45	0	6.55	0
AT3G20840	6.55	0	6.55	0	0	0
AT4G15150	6.55	0	6.55	0	0	0
AT4G15160	6.55	0	6.55	0	3.11	0
AT3G57130	6.54	6.54	0	0	0	0
AT3G57880	6.54	0	0	6.54	0	0
AT4G28230	6.54	0	6.54	0	0	0
AT4G28240	6.54	0	0	6.54	0	0
AT4G20060	6.53	0	6.53	0	0	0
AT4G20070	6.53	0	0	6.53	0	0
AT2G29650	6.52	6.52	4.01	0	0	0
AT2G29654	6.52	0	0	6.52	4.01	0
AT2G29660	6.52	0	4.01	6.52	0	0
AT3G52870	6.52	6.52	0	0	0	0
AT1G28375	6.51	0	0	6.51	0	0
AT2G32970	6.51	0	0	6.51	0	0
AT3G51410	6.51	0	0	3.77	0	6.51
AT1G72450	6.5	3.21	4.04	6.5	3.13	0
AT5G47060	6.5	0	6.5	0	0	0
AT1G78100	6.49	5.35	6.49	0	0	0
AT2G30920	6.49	6.49	0	0	0	0
AT2G30925	6.49	0	0	0	0	6.49
AT2G30930	6.49	0	0	6.49	0	0
AT2G39360	6.49	0	0	6.49	0	0
AT1G01250	6.48	6.48	0	0	0	0
AT1G01260	6.48	0	0	6.48	3.47	0
AT5G62560	6.48	0	0	0	0	6.48
AT5G62570	6.48	6.48	0	0	0	0
AT1G75540	6.47	6.47	3.66	0	0	0
AT3G42800	6.47	0	0	6.47	0	5.38
AT3G56050	6.46	0	0	6.46	0	0
AT4G23670	6.46	0	6.46	0	0	0
AT1G15750	6.45	4.66	6.45	5.42	0	0
AT3G01490	6.45	0	0	6.45	3.21	0
AT1G19180	6.44	3.41	6.44	4.61	0	0
AT1G19190	6.44	6.44	0	0	0	0
AT1G21590	6.44	0	6.44	5.05	0	0
AT1G21600	6.44	0	0	0	6.44	5.05
AT5G53880	6.44	6.44	0	0	0	0
AT5G53890	6.44	0	6.44	0	0	0
AT5G63520	6.44	6.44	5.28	3.02	0	0
AT5G63530	6.44	5.28	6.44	0	0	0
AT1G32640	6.43	0	4	6.43	0	0
AT2G31005	6.43	0	3.45	0	0	6.43
AT2G31010	6.43	0	3.45	6.43	0	0
AT5G44120	6.43	3.3	3.21	6.43	0	0
AT5G44130	6.43	6.43	3.59	3.3	0	0
AT2G27500	6.42	0	0	6.42	4.01	0
AT2G27505	6.42	0	6.42	0	0	0
AT2G40970	6.41	0	4.32	6.41	0	0
AT4G11050	6.41	0	6.41	0	0	0
AT3G23167	6.4	6.4	0	0	0	0
AT3G23170	6.4	0	0	6.4	0	0
AT3G23171	6.4	0	0	0	0	6.4
AT3G25716	6.4	6.4	3.02	4.45	0	3.03
AT3G25717	6.4	0	3.18	6.4	0	3.02
AT3G54802	6.39	0	6.39	0	0	0
AT3G54804	6.39	3.97	0	6.39	0	0
AT3G54810	6.39	6.39	0	3.97	5.23	0
AT3G62270	6.39	0	6.39	0	0	0
AT4G24060	6.39	0	6.39	0	0	0
AT1G69400	6.38	0	0	0	0	6.38
AT1G69410	6.38	0	0	0	6.38	3.7
AT3G47620	6.38	0	0	6.38	0	0
AT1G18700	6.37	0	0	0	5.59	6.37
AT1G22230	6.37	0	0	0	0	6.37
AT1G22240	6.37	0	6.37	0	0	0
AT1G65720	6.37	4.56	6.37	0	0	0
AT1G65730	6.37	0	0	6.37	4.56	0
AT1G69870	6.37	0	6.37	0	4.42	0
AT1G76900	6.37	0	6.37	3.01	0	0
AT2G04680	6.37	0	0	5.06	0	6.37
AT2G04690	6.37	0	6.37	0	0	0
AT2G39980	6.37	6.37	0	0	0	0
AT2G45660	6.37	0	4.26	6.37	0	0
AT4G02100	6.37	3.17	0	6.37	0	0
AT4G08620	6.37	6.37	0	0	0	0
AT4G22940	6.37	6.37	0	0	0	0
AT4G22950	6.37	0	0	0	6.37	0
AT5G07010	6.37	4.17	0	6.37	5.13	3.21
AT5G25810	6.37	4.32	6.37	0	0	0
AT5G67190	6.37	6.37	4.03	0	0	0
AT3G46700	6.36	6.36	0	0	0	0
AT5G57120	6.35	0	6.35	0	0	0
AT5G57123	6.35	0	3.01	0	0	6.35
AT1G02360	6.34	0	0	0	0	6.34
AT1G02370	6.34	6.34	0	0	0	0
AT5G04770	6.34	4.64	6.34	4.68	0	4.18
AT1G13240	6.33	4.53	6.33	0	0	0
AT5G24870	6.33	0	0	6.33	0	0
AT2G04160	6.32	0	0	0	6.32	0
AT3G47210	6.31	0	0	6.31	0	3.71
AT5G08130	6.31	6.31	4.44	0	0	0
AT5G67360	6.31	0	6.31	0	0	0
AT5G67370	6.31	0	0	0	0	6.31
AT2G22668	6.3	0	6.3	3.69	0	0
AT2G22670	6.3	0	0	6.3	0	0
AT3G24518	6.3	0	6.3	0	4.27	0
AT3G24520	6.3	0	0	0	4.27	6.3
AT4G18390	6.3	0	6.3	0	0	0
AT4G18395	6.3	6.3	0	0	0	0
AT5G66790	6.3	0	0	0	0	6.3
AT5G66800	6.3	6.3	0	4.69	0	0
AT3G45780	6.29	0	4.65	3.45	6.29	0
AT5G03730	6.29	0	5.03	6.29	0	0
AT5G03740	6.29	0	6.29	5.03	0	0
AT2G19180	6.28	0	0	6.28	0	0
AT2G21580	6.28	0	0	0	0	6.28
AT2G21590	6.28	0	0	6.28	0	0
AT1G18835	6.27	0	0	6.27	0	0
AT1G73210	6.27	6.27	3.5	4	0	0
AT1G67900	6.25	0	0	6.25	6.14	0
AT5G36950	6.25	0	0	0	0	6.25
AT5G36960	6.25	0	0	6.25	0	0
AT3G52500	6.23	0	6.23	4.58	0	0
AT3G52510	6.23	0	0	0	0	6.23
AT5G14345	6.23	6.23	0	0	0	0
AT5G46170	6.23	0	6.23	4.49	0	0
AT5G46180	6.23	0	0	0	0	6.23
AT2G42425	6.22	0	3.43	3.46	6.22	0
AT2G42430	6.22	0	6.22	3.46	3.43	0
AT4G24230	6.22	6.22	3.76	0	0	0
AT4G24240	6.22	0	3.76	6.22	4.89	0
AT3G12300	6.21	0	0	6.21	0	0
AT3G12320	6.21	0	0	6.21	0	0
AT3G26510	6.21	3.62	6.21	0	0	0
AT3G26511	6.21	3.62	0	6.21	0	0
AT5G25220	6.2	6.2	0	0	0	0
AT4G04830	6.19	0	0	6.19	0	0
AT1G76620	6.18	4.47	6.18	6.07	3.6	0
AT1G09520	6.17	0	0	6.17	0	0
AT5G53760	6.17	5.86	0	6.17	0	0
AT5G57060	6.17	0	0	0	0	6.17
AT2G35920	6.15	0	0	0	0	6.15
AT1G21400	6.14	0	0	0	6.14	0
AT1G21410	6.14	6.14	0	0	0	0
AT3G54990	6.14	5.52	6.14	0	0	0
AT5G19100	6.12	0	0	0	6.12	0
AT1G21660	6.11	0	0	0	0	6.11
AT1G21670	6.11	0	0	6.11	0	3.25
AT5G63120	6.1	3.13	6.1	0	0	0
AT5G63130	6.1	0	0	0	6.1	3.13
AT5G63135	6.1	0	0	0	4.03	6.1
AT1G22810	6.08	0	0	6.08	0	0
AT1G22830	6.08	0	0	6.08	0	0
AT1G52890	6.08	0	0	6.08	0	0
AT2G23690	6.08	0	0	0	6.08	0
AT2G32980	6.08	6.08	4.31	0	0	0
AT2G32990	6.08	4.31	0	6.08	0	0
AT3G57400	6.08	0	6.08	0	0	0
AT5G25460	6.08	3.54	0	5.45	6.08	0
AT5G62390	6.08	0	0	6.08	0	0
AT5G62400	6.08	0	0	0	6.08	0
AT5G62410	6.08	0	6.08	0	0	0
AT1G72580	6.07	6.07	0	0	0	0
AT1G72590	6.07	0	0	0	0	6.07
AT1G72600	6.07	0	0	6.07	0	3.4
AT3G23633	6.07	6.07	0	0	0	0
AT3G57010	6.07	0	0	0	0	6.07
AT4G22070	6.07	0	0	6.07	0	0
AT5G24760	6.07	0	6.07	0	0	0
AT5G41130	6.07	0	6.07	0	0	0
AT1G17350	6.06	0	4.05	5.32	0	6.06
AT1G17360	6.06	0	6.06	0	0	0
AT1G30825	6.06	0	6.06	4.34	0	0
AT1G51150	6.06	6.06	0	0	0	3.36
AT1G51160	6.06	0	3.36	0	0	6.06
AT1G53200	6.06	0	6.06	0	0	0
AT1G53210	6.06	0	0	6.06	0	0
AT1G65320	6.06	0	0	6.06	0	4.51
AT1G66140	6.06	0	0	0	6.06	0
AT4G01520	6.06	0	0	0	6.06	0
AT2G45430	6.05	0	6.05	4.43	0	0
AT4G30090	6.05	0	0	0	0	6.05
AT5G04560	6.05	0	0	0	0	6.05
AT5G04590	6.05	0	0	6.05	0	0
AT5G45650	6.05	0	0	0	6.05	0
AT5G66650	6.05	0	5.29	0	0	6.05
AT2G41310	6.04	0	6.04	4.04	0	4.82
AT3G43790	6.04	0	0	0	5.28	6.04
AT3G43800	6.04	0	3.54	6.04	0	0
AT3G58840	6.04	6.04	0	0	0	0
AT3G58850	6.04	0	6.04	0	0	0
AT4G30074	6.04	6.04	4.7	0	3.66	0
AT5G40140	6.04	6.04	0	0	0	0
AT5G53420	6.04	0	6.04	0	5.79	0
AT5G64750	6.04	0	0	6.04	4.03	0
AT1G32670	6.03	0	0	5.9	4.77	6.03
AT3G31401	6.03	6.03	0	0	0	0
AT3G31402	6.03	0	0	6.03	0	0
AT5G35475	6.03	0	0	0	0	6.03
AT5G52850	6.03	0	0	6.03	0	0
AT2G36420	6.02	6.02	0	0	0	0
AT3G04070	6.02	6.02	0	5.06	0	0
AT3G11490	6.02	0	6.02	4.03	0	0
AT3G11500	6.02	0	0	0	0	6.02
AT1G69910	6.01	0	0	0	6.01	0
AT1G71030	6	0	0	6	0	0
AT1G71040	6	0	0	0	0	6
AT3G12120	6	0	0	6	3.91	0
AT3G12130	6	0	0	0	0	6
AT4G14150	6	0	0	6	0	0
AT4G14160	6	6	0	0	0	0
AT5G04120	6	5.24	6	3.26	0	0
AT5G06530	6	0	0	0	6	0
AT1G20330	5.99	0	0	4.73	0	5.99
AT3G13594	5.99	0	0	3.01	4.14	5.99
AT3G13800	5.99	0	5.79	4.71	0	5.99
AT1G69760	5.98	5.98	0	5	0	0
AT2G47430	5.98	5.98	0	0	0	0
AT4G18970	5.98	0	0	5.98	0	0
AT4G18975	5.98	0	0	0	0	5.98
AT3G17980	5.97	0	0	0	0	5.97
AT3G17998	5.97	0	0	5.97	0	0
AT3G18000	5.97	0	0	5.97	0	0
AT3G50750	5.97	0	0	5.97	3.23	0
AT3G50751	5.97	0	3.23	0	5.97	0
AT2G41233	5.94	5.94	0	0	0	0
AT2G41240	5.94	0	0	5.94	0	0
AT3G19810	5.94	5.94	0	0	0	0
AT3G19820	5.94	0	0	0	5.94	0
AT4G00140	5.94	5.94	0	0	0	0
AT4G00150	5.94	0	0	0	0	5.94
AT5G59350	5.94	0	5.94	0	0	0
AT5G60850	5.94	0	3.92	5.94	0	4.38
AT1G75590	5.93	5.93	0	0	0	0
AT3G07010	5.93	0	0	4.1	5.93	0
AT5G63860	5.93	0	0	5.93	0	0
AT1G65690	5.91	0	0	5.91	0	0
AT2G40540	5.91	0	3.53	5.91	0	0
AT3G17880	5.91	5.91	0	0	0	0
AT3G18050	5.91	0	0	0	5.91	0
AT3G18060	5.91	0	5.91	0	0	0
AT5G62280	5.91	4.36	5.36	5.91	0	4.08
AT5G62290	5.91	5.91	0	4.08	0	0
AT5G65650	5.91	0	0	0	0	5.91
AT1G14890	5.9	0	0	5.9	0	3.15
AT1G70270	5.9	4.19	0	5.9	0	0
AT4G25350	5.9	0	0	5.9	0	0
AT4G25360	5.9	5.9	0	0	0	0
AT1G25425	5.89	0	0	5.89	0	0
AT2G25430	5.89	0	0	0	0	5.89
AT2G25440	5.89	0	5.89	2.99	0	0
AT1G69540	5.88	0	2.99	0	0	5.88
AT3G21070	5.88	3.66	5.88	0	0	0
AT4G35100	5.88	3.27	0	5.88	0	0
AT1G67090	5.87	0	5.87	0	0	0
AT1G67100	5.87	5.87	0	0	0	0
AT1G76240	5.87	0	0	5.87	0	0
AT2G34710	5.87	0	5.87	0	0	0
AT4G35837	5.87	5.87	0	0	0	0
AT4G35840	5.87	0	0	0	0	5.87
AT4G35850	5.87	0	0	5.87	0	0
AT5G25180	5.87	3.47	5.87	0	0	0
AT1G29500	5.86	0	0	3.77	0	5.86
AT1G29510	5.86	0	3.77	3.75	5.86	0
AT1G29520	5.86	3.77	3.75	5.86	0	0
AT4G00760	5.86	5.86	0	0	0	0
AT4G00770	5.86	0	0	0	5.86	0
AT4G00780	5.86	5.86	0	0	0	0
AT4G35200	5.86	0	0	5.86	0	0
AT4G35210	5.86	0	0	5.86	0	0
AT4G35220	5.86	5.86	0	0	0	0
AT5G22740	5.86	0	0	0	5.86	0
AT5G42740	5.86	0	0	0	0	5.86
AT5G53750	5.86	0	0	4.01	0	5.86
AT1G32090	5.84	0	5.84	0	0	0
AT1G32100	5.84	0	0	0	0	5.84
AT3G03690	5.84	0	0	5.84	0	0
AT3G03700	5.84	0	5.84	0	0	0
AT3G04010	5.84	0	0	0	5.84	0
AT3G04020	5.84	3.5	5.84	0	0	0
AT1G68185	5.82	0	0	0	0	5.82
AT1G68190	5.82	0	0	5.82	0	0
AT2G14890	5.82	0	0	5.82	0	0
AT3G52280	5.82	5.82	0	0	0	0
AT3G52285	5.82	0	0	5.82	0	0
AT3G52290	5.82	0	0	5.82	0	0
AT3G60190	5.82	0	0	5.82	0	0
AT3G60200	5.82	0	0	5.82	0	0
AT1G19100	5.81	0	0	0	0	5.81
AT1G19110	5.81	0	0	5.81	0	0
AT5G41310	5.81	5.81	0	0	0	0
AT1G56590	5.79	5.79	0	0	0	0
AT1G56600	5.79	0	0	5.79	0	0
AT1G68620	5.79	0	0	5.79	0	0
AT1G68630	5.79	5.79	0	0	0	0
AT3G13790	5.79	4.71	5.79	0	0	4.96
AT3G62097	5.79	0	5.79	0	0	0
AT3G62100	5.79	3.25	0	5.79	0	0
AT4G03205	5.79	0	0	0	0	5.79
AT4G03210	5.79	0	0	5.79	0	0
AT4G03220	5.79	0	5.79	0	0	0
AT4G20870	5.79	0	5.79	3.41	0	0
AT4G20880	5.79	0	3.02	0	0	5.79
AT5G22500	5.79	0	5.79	3.11	0	0
AT5G46820	5.79	0	0	0	0	5.79
AT5G67150	5.79	0	5.79	0	0	0
AT5G67160	5.79	0	0	5.79	0	0
AT5G67170	5.79	0	0	5.79	0	0
AT2G22125	5.78	0	5.78	0	0	0
AT2G38810	5.78	0	0	5.78	0	0
AT2G38820	5.78	0	0	5.78	0	0
AT2G38823	5.78	5.78	0	0	0	0
AT5G28300	5.78	3.85	0	0	0	5.78
AT4G16780	5.77	4.01	5.77	4.03	0	0
AT1G16360	5.76	0	5.76	0	0	0
AT1G16370	5.76	0	0	5.76	0	0
AT1G36060	5.76	0	5.76	3.32	0	0
AT3G59760	5.76	5.76	0	0	3.66	0
AT3G59765	5.76	0	0	5.76	0	0
AT3G59770	5.76	0	0	0	0	5.76
AT4G32300	5.76	3.73	5.76	0	0	0
AT1G13250	5.75	5.75	0	0	0	4.61
AT3G49790	5.75	0	3.21	5.75	0	0
AT3G49796	5.75	0	5.75	0	3.21	0
AT3G61420	5.75	0	4.07	5.75	0	0
AT3G61430	5.75	0	0	5.75	0	0
AT4G32800	5.74	0	5.74	0	0	0
AT5G13181	5.74	5.74	0	0	0	0
AT1G68130	5.73	0	0	5.73	0	0
AT4G37760	5.73	0	0	0	0	5.73
AT5G44380	5.73	0	0	5.73	0	0
AT5G44390	5.73	0	0	0	0	5.73
AT5G56970	5.73	5.73	0	0	0	0
AT3G19690	5.72	0	0	0	4.05	5.72
AT3G19700	5.72	0	5.72	0	0	0
AT3G59430	5.72	5.72	0	4	0	0
AT3G59440	5.72	4	0	5.72	0	0
AT4G24970	5.72	0	0	0	0	5.72
AT5G37950	5.72	5.72	0	0	0	0
AT1G78290	5.71	3.54	5.71	0	0	0
AT1G78300	5.71	0	0	5.71	0	0
AT4G30410	5.71	0	5.71	5.53	0	3.2
AT1G50420	5.7	0	0	5.7	0	0
AT1G50430	5.7	0	0	0	0	5.7
AT3G25650	5.7	5.7	5.15	0	0	0
AT3G25655	5.7	0	0	5.7	0	0
AT3G25660	5.7	0	0	0	0	5.7
AT4G09030	5.7	0	0	0	0	5.7
AT1G04310	5.69	0	0	5.69	0	0
AT1G04320	5.69	0	5.69	0	0	0
AT1G27740	5.69	0	5.69	0	3.89	0
AT1G30680	5.69	0	0	0	0	5.69
AT1G30690	5.69	0	0	5.69	0	0
AT1G33440	5.69	0	5.69	0	0	0
AT1G76230	5.69	0	3.15	0	0	5.69
AT2G37670	5.69	5.69	0	0	0	0
AT2G37678	5.69	0	0	5.69	0	0
AT2G37680	5.69	0	0	0	0	5.69
AT2G37690	5.69	5.69	0	0	0	0
AT3G27560	5.69	0	0	5.69	0	0
AT3G27570	5.69	0	0	0	0	5.69
AT3G45610	5.69	5.69	3.13	0	0	0
AT4G21750	5.69	0	5.69	4.1	0	0
AT4G28630	5.69	0	0	5.69	0	0
AT4G28640	5.69	0	0	5.69	0	0
AT4G35025	5.69	5.69	0	0	0	0
AT4G35030	5.69	0	0	0	0	5.69
AT4G35040	5.69	0	5.69	0	0	0
AT4G37260	5.69	3.53	0	5.69	0	0
AT5G05850	5.69	3.21	0	5.69	0	0
AT5G05860	5.69	0	0	5.69	0	3.21
AT5G05870	5.69	5.69	0	3.21	0	0
AT5G07440	5.69	0	5.31	5.69	0	0
AT5G39040	5.69	3.25	5.69	0	0	4.72
AT5G45820	5.69	0	5.69	0	0	0
AT5G45830	5.69	0	3.15	0	5.69	0
AT1G64140	5.68	0	3.03	5.68	0	0
AT1G64142	5.68	0	3.03	5.68	0	0
AT2G39445	5.68	5.68	0	0	0	0
AT2G39450	5.68	0	0	5.68	0	0
AT2G39460	5.68	0	0	5.68	0	0
AT2G39470	5.68	5.68	0	0	0	0
AT3G13040	5.68	0	0	5.68	0	0
AT3G13050	5.68	0	5.68	0	0	4.68
AT3G14205	5.68	5.68	0	0	0	0
AT5G20170	5.68	5.68	0	0	0	0
AT5G20181	5.68	0	0	0	0	5.68
AT5G20190	5.68	0	0	5.68	0	0
AT3G60380	5.67	0	5.67	0	0	0
AT3G60390	5.67	3.66	5.39	4.28	4.63	5.67
AT1G14330	5.66	0	5.66	0	0	0
AT1G57980	5.66	5.66	0	0	0	0
AT1G57990	5.66	0	0	5.66	0	0
AT2G36080	5.66	0	0	5.66	0	0
AT2G42030	5.66	0	5.66	0	0	0
AT2G42040	5.66	0	0	5.66	0	0
AT3G53250	5.66	0	3.36	5.66	0	0
AT5G45500	5.66	5.66	0	0	0	0
AT5G59050	5.66	0	0	0	4.21	5.66
AT1G05830	5.65	0	0	0	0	5.65
AT1G05835	5.65	0	0	5.65	0	0
AT1G05840	5.65	0	0	0	0	5.65
AT1G23700	5.65	5.65	0	0	0	0
AT1G23710	5.65	0	0	5.65	0	0
AT1G11510	5.64	0	5.64	0	0	0
AT1G11520	5.64	0	0	0	0	5.64
AT1G11530	5.64	0	0	0	5.64	0
AT1G11540	5.64	0	0	0	0	5.64
AT1G22060	5.64	0	5.64	0	0	0
AT1G29910	5.64	5.64	0	0	0	0
AT1G29920	5.64	0	0	5.64	0	0
AT1G29930	5.64	0	5.64	0	0	0
AT1G63050	5.64	0	0	5.64	0	0
AT1G63055	5.64	0	5.64	0	0	0
AT1G63057	5.64	0	5.64	0	0	0
AT2G26530	5.64	0	0	5.64	0	0
AT2G39210	5.64	0	0	5.64	0	5.36
AT4G26690	5.64	0	5.64	0	0	0
AT4G26700	5.64	5.64	3.81	0	0	0
AT4G30790	5.64	0	5.64	0	0	0
AT4G30800	5.64	0	5.64	0	0	0
AT4G27300	5.63	5.63	2.99	3.63	0	0
AT4G27310	5.63	2.99	0	5.63	0	2.99
AT4G27654	5.63	0	0	4.09	0	5.63
AT4G27657	5.63	0	4.09	5.63	0	3.78
AT1G76090	5.62	0	5.62	3.86	3.46	4.86
AT1G76100	5.62	0	0	0	0	5.62
AT2G40460	5.62	0	0	0	0	5.62
AT2G40470	5.62	3.94	0	0	0	5.62
AT4G38470	5.62	0	5.62	0	0	0
AT5G02350	5.62	2.99	0	5.62	0	0
AT5G05965	5.62	0	0	5.62	0	0
AT5G05970	5.62	5.62	0	0	0	0
AT5G07571	5.62	5.62	0	0	0	0
AT5G07580	5.62	0	0	0	5.62	3.64
AT1G69160	5.61	4.51	0	5.61	0	0
AT3G61960	5.61	5.61	0	0	0	2.99
AT3G61962	5.61	4.29	5.61	0	0	0
AT2G43330	5.6	0	0	0	0	5.6
AT2G43340	5.6	5.6	3.8	3.68	0	0
AT2G45310	5.6	0	0	5.6	0	0
AT2G45315	5.6	0	0	0	0	5.6
AT3G16370	5.6	0	0	5.6	0	0
AT4G15690	5.6	0	0	0	0	5.6
AT4G15700	5.6	0	5.6	3.35	0	0
AT4G37390	5.6	3.68	0	5.6	0	0
AT5G57785	5.6	5.6	0	0	0	0
AT5G57790	5.6	0	3.21	0	0	5.6
AT3G17100	5.59	0	0	0	0	5.59
AT3G62640	5.59	0	5.59	0	0	3.77
AT3G62650	5.59	0	3.77	5.59	0	0
AT1G26150	5.58	0	5.58	0	0	0
AT1G26160	5.58	0	0	0	0	5.58
AT4G01860	5.58	5.58	0	0	3.01	0
AT4G01865	5.58	5.58	0	0	0	0
AT4G01870	5.58	0	0	5.58	0	0
AT4G01880	5.58	0	0	0	0	5.58
AT4G01883	5.58	5.58	0	0	0	0
AT1G07090	5.57	0	5.57	3.69	0	5.32
AT1G07100	5.57	3.69	5.57	0	0	0
AT1G22620	5.57	5.57	0	0	0	0
AT1G22640	5.57	0	0	5.57	0	0
AT2G30550	5.57	0	4.34	3.67	5.57	0
AT2G30560	5.57	0	0	5.57	0	0
AT5G16020	5.57	0	0	0	0	5.57
AT5G16023	5.57	0	3.91	0	0	5.57
AT5G63350	5.57	5.57	3.26	0	0	0
AT5G63370	5.57	0	0	0	0	5.57
AT1G13080	5.56	0	0	5.56	0	0
AT1G13090	5.56	5.56	0	0	0	0
AT1G76600	5.56	3.6	5.56	0	0	0
AT3G13000	5.56	0	0	5.56	0	0
AT3G13010	5.56	0	0	0	0	5.56
AT5G42650	5.56	0	0	5.56	0	0
AT1G17220	5.55	0	0	0	0	5.55
AT1G17230	5.55	0	0	5.55	0	0
AT5G44290	5.55	0	0	5.55	0	0
AT5G49800	5.55	3.11	5.55	0	0	0
AT5G49810	5.55	0	5.55	0	0	0
AT1G64700	5.54	5.54	0	0	0	0
AT1G64710	5.54	0	5.54	0	0	0
AT2G47330	5.54	0	5.54	0	0	0
AT2G47340	5.54	0	0	0	0	5.54
AT2G47350	5.54	0	0	5.54	0	0
AT5G15600	5.54	0	3.96	5.54	0	0
AT5G15610	5.54	5.54	0	0	0	0
AT5G19180	5.54	0	0	0	0	5.54
AT5G19190	5.54	0	0	5.54	0	3.15
AT5G19200	5.54	0	5.54	3.15	0	0
AT5G47360	5.54	5.54	0	0	0	0
AT2G18010	5.53	0	0	5.53	0	0
AT3G19540	5.53	0	0	0	0	5.53
AT4G34220	5.53	0	0	5.53	0	0
AT5G06560	5.53	0	5.53	0	0	0
AT5G06570	5.53	0	0	0	0	5.53
AT1G18400	5.52	0	0	5.52	4.52	0
AT1G19460	5.52	0	0	5.52	0	0
AT1G19464	5.52	5.52	0	0	0	0
AT2G40000	5.52	5.52	0	0	0	0
AT2G40004	5.52	0	0	0	5.52	0
AT2G41370	5.52	5.52	0	0	0	0
AT3G55000	5.52	5.52	0	0	0	0
AT4G18950	5.52	0	0	5.52	0	0
AT5G49330	5.52	0	0	0	5.52	0
AT5G56980	5.52	0	5.52	5.46	0	0
AT2G43000	5.51	5.51	0	0	0	0
AT2G43010	5.51	0	5.51	3.87	0	5.33
AT3G57410	5.51	0	0	3.39	0	5.51
AT4G34710	5.51	0	0	5.51	3	4
AT5G14170	5.51	5.51	0	0	0	0
AT5G14180	5.51	0	3.51	0	5.51	0
AT5G14200	5.51	5.51	0	3.51	0	0
AT5G58640	5.51	0	0	0	0	5.51
AT5G58650	5.51	0	3.37	5.51	0	0
AT5G58660	5.51	0	0	5.51	3.37	0
AT1G72680	5.5	5.5	0	0	0	0
AT4G36870	5.5	0	5.5	0	0	0
AT5G66631	5.5	0	0	0	0	5.5
AT5G66640	5.5	0	5.5	3.25	0	0
AT1G70420	5.49	0	5.49	0	0	0
AT1G70430	5.49	5.49	0	0	0	0
AT2G34150	5.49	0	0	5.49	0	0
AT2G34160	5.49	4.04	5.49	0	0	0
AT4G38830	5.49	4.18	0	0	0	5.49
AT4G38840	5.49	3.67	0	5.49	0	0
AT4G38850	5.49	0	0	5.49	0	0
AT5G57390	5.49	5.49	0	0	0	0
AT1G52855	5.48	0	0	3.75	5.48	0
AT1G52857	5.48	3.75	5.48	0	0	0
AT1G52870	5.48	5.48	3.75	0	0	0
AT1G60000	5.48	0	5.48	0	0	0
AT1G60010	5.48	3.15	0	5.48	0	0
AT1G65590	5.48	0	0	0	5.48	0
AT3G50665	5.48	0	5.48	3.27	0	0
AT4G13930	5.48	0	5.48	0	0	0
AT4G13940	5.48	5.48	0	3.67	0	0
AT4G20140	5.48	0	2.99	5.48	0	0
AT4G37590	5.48	0	5.48	4.8	0	3.9
AT4G37608	5.48	4.8	4.39	5.48	0	0
AT5G02760	5.48	0	3.42	5.48	0	0
AT5G53010	5.48	0	0	5.48	0	0
AT5G53020	5.48	5.48	0	0	0	0
AT3G16500	5.47	0	5.47	4.82	0	0
AT4G25770	5.47	0	4.87	5.47	0	0
AT4G25780	5.47	0	0	5.47	4.87	0
AT4G16130	5.46	0	0	0	0	5.46
AT4G16140	5.46	0	0	5.46	0	3.36
AT5G18910	5.46	0	0	5.46	0	0
AT5G18920	5.46	0	0	5.46	0	0
AT5G63450	5.45	0	5.45	0	3.22	0
AT1G10480	5.44	3.21	5.44	0	0	3.1
AT2G19780	5.44	0	0	4.65	5.44	0
AT2G19790	5.44	5.44	4.65	0	0	0
AT3G56760	5.44	0	0	5.44	0	0
AT5G60200	5.44	0	0	5.44	0	0
AT5G60650	5.44	5.44	0	0	0	0
AT5G60660	5.44	3.1	0	5.44	0	0
AT3G25727	5.43	0	5.43	0	0	0
AT3G25730	5.43	0	0	5.43	0	0
AT3G25740	5.43	0	5.43	0	0	0
AT4G21060	5.43	0	0	5.43	0	0
AT5G27660	5.41	0	5.41	0	0	0
AT5G27670	5.41	0	0	5.41	0	0
AT5G27680	5.41	0	0	0	0	5.41
AT2G18780	5.4	0	5.4	0	0	0
AT2G18790	5.4	0	0	5.4	0	0
AT2G36870	5.4	0	5.4	0	0	0
AT2G35930	5.39	0	0	5.39	0	0
AT3G23440	5.39	0	3.54	0	5.39	0
AT4G22680	5.39	0	0	5.39	5.01	0
AT5G55390	5.39	0	0	5.39	0	0
AT5G55400	5.39	0	0	3.63	0	5.39
AT1G30500	5.38	3.74	0	5.38	0	0
AT1G30510	5.38	0	0	0	3.74	5.38
AT1G31920	5.38	0	0	5.38	0	0
AT1G31930	5.38	0	0	5.38	0	0
AT2G25900	5.38	0	3.3	5.38	0	0
AT3G15030	5.38	0	5.38	0	0	0
AT5G61560	5.38	0	0	0	5.38	3.79
AT1G71070	5.37	5.37	0	0	0	0
AT1G71080	5.37	0	0	5.37	0	0
AT1G71090	5.37	0	0	5.37	0	0
AT1G71100	5.37	5.37	0	0	0	3.99
AT2G23118	5.37	0	2.99	5.37	0	0
AT2G23120	5.37	0	5.19	0	3.03	5.37
AT2G23130	5.37	0	5.37	2.99	0	0
AT4G35720	5.37	0	0	5.37	0	0
AT1G63030	5.36	5.36	0	0	0	0
AT2G32940	5.36	0	0	0	0	5.36
AT3G57550	5.36	4.22	0	0	3.27	5.36
AT3G57560	5.36	0	0	0	0	5.36
AT3G57570	5.36	5.36	0	0	3.23	0
AT1G09970	5.35	4.19	0	5.35	0	0
AT1G32650	5.35	0	0	0	0	5.35
AT1G32660	5.35	3.7	0	5.35	0	0
AT1G44130	5.35	0	0	5.35	0	0
AT1G46554	5.35	0	0	0	5.35	0
AT1G64780	5.35	0	0	5.35	0	0
AT2G31370	5.35	0	0	5.35	0	0
AT2G36880	5.35	0	0	5.35	0	0
AT2G36881	5.35	0	0	5.35	0	0
AT2G36885	5.35	0	3.78	0	0	5.35
AT2G47440	5.35	5.35	3.54	3.86	0	0
AT3G03270	5.35	5.35	0	0	0	0
AT3G03272	5.35	0	0	5.35	0	0
AT3G03280	5.35	0	0	5.35	0	0
AT3G03290	5.35	0	5.35	0	0	0
AT3G20360	5.35	0	5.35	3.63	0	0
AT3G20362	5.35	0	3.63	5.35	0	0
AT3G20365	5.35	0	3.63	5.35	0	0
AT3G20370	5.35	3.63	5.35	0	0	0
AT3G27540	5.35	5.35	0	0	0	0
AT3G46120	5.35	5.35	0	0	0	0
AT4G04890	5.35	5.35	0	0	0	0
AT4G18450	5.35	0	5.35	3.6	0	0
AT4G18470	5.35	0	0	5.35	0	0
AT4G21790	5.35	0	0	5.35	0	0
AT5G02500	5.35	0	0	5.35	0	0
AT5G48010	5.35	0	0	5.35	0	0
AT5G48800	5.35	0	5.35	0	0	0
AT5G65210	5.35	0	0	5.35	0	0
AT1G25560	5.34	5.34	0	4.93	0	0
AT1G61100	5.34	0	0	0	5.34	0
AT2G26110	5.34	0	0	0	0	5.34
AT2G26120	5.34	0	5.34	0	0	0
AT3G23620	5.34	0	0	0	0	5.34
AT4G01460	5.34	0	5.34	0	0	0
AT5G01210	5.34	3.62	5.34	0	0	0
AT2G39130	5.33	0	4.55	5.33	0	0
AT2G39140	5.33	5.33	4.55	0	0	0
AT3G30775	5.33	5.33	0	0	0	0
AT4G02710	5.33	0	5.33	0	0	0
AT4G18660	5.33	0	0	0	0	5.33
AT4G18670	5.33	0	0	0	4.4	5.33
AT4G32070	5.33	0	0	5.33	0	0
AT4G32080	5.33	0	0	0	0	5.33
AT4G39770	5.33	4.69	5.33	0	0	0
AT5G42690	5.33	0	5.33	0	0	0
AT5G42700	5.33	0	0	5.33	0	0
AT1G07080	5.32	0	0	0	0	5.32
AT1G17345	5.32	0	0	4.05	3.7	5.32
AT1G11600	5.31	0	0	0	5.31	0
AT1G11608	5.31	0	5.31	3.32	0	0
AT1G73470	5.31	0	0	0	0	5.31
AT1G73480	5.31	0	5.31	0	0	0
AT3G12820	5.31	5.31	0	0	0	0
AT3G12830	5.31	0	0	0	0	5.31
AT3G44960	5.31	5.31	0	0	0	0
AT5G07430	5.31	0	0	0	0	5.31
AT5G15640	5.31	0	0	0	0	5.31
AT5G15650	5.31	0	5.31	4.79	0	0
AT1G08200	5.3	0	0	5.3	0	0
AT1G08210	5.3	0	0	0	0	5.3
AT3G61880	5.3	3.16	3.47	0	5.3	0
AT5G22940	5.3	0	5.05	0	5.3	0
AT5G22950	5.3	5.3	0	0	0	0
AT1G70310	5.29	0	0	3.45	0	5.29
AT3G09560	5.29	0	0	5.29	0	0
AT3G09570	5.29	0	0	5.29	0	0
AT5G66658	5.29	5.29	0	0	0	0
AT1G79270	5.28	0	0	5.28	0	0
AT3G07360	5.28	0	5.28	4.44	0	3.14
AT3G62150	5.28	5.28	0	0	0	0
AT3G62160	5.28	0	0	5.28	0	0
AT3G62170	5.28	0	0	0	5.28	0
AT4G02080	5.28	0	5.28	0	0	0
AT4G22780	5.28	0	0	5.28	3.03	0
AT5G20950	5.28	0	0	5.28	0	0
AT5G42680	5.28	0	5.28	0	0	0
AT2G42620	5.27	0	5.27	0	0	0
AT3G57060	5.27	5.27	0	0	0	0
AT3G57070	5.27	0	0	5.27	0	0
AT3G57080	5.27	5.27	0	0	0	0
AT4G22590	5.27	3.01	4.23	5.27	0	0
AT4G22592	5.27	3.01	4.23	5.27	0	0
AT5G44260	5.27	0	0	0	0	5.27
AT1G77655	5.26	0	5.26	0	0	0
AT2G28540	5.26	0	0	0	0	5.26
AT5G21482	5.26	0	0	0	5.26	0
AT5G40384	5.26	0	5.26	0	0	0
AT5G40390	5.26	5.26	0	0	0	0
AT4G18010	5.25	0	0	5.25	0	0
AT4G19230	5.25	0	3.32	5.25	0	0
AT4G33430	5.25	0	0	5.25	0	0
AT4G33440	5.25	0	0	5.25	0	0
AT1G03590	5.24	0	5.24	0	0	0
AT1G33170	5.24	0	0	5.24	3.9	0
AT1G59940	5.24	0	0	0	5.24	4.27
AT1G76360	5.24	0	5.24	0	0	0
AT1G76370	5.24	0	0	0	0	5.24
AT2G14850	5.24	0	0	5.24	0	0
AT2G16400	5.24	0	0	5.24	0	0
AT3G08710	5.24	0	0	0	0	5.24
AT3G55980	5.24	0	0	5.23	0	5.24
AT3G55990	5.24	0	5.24	0	0	0
AT5G04110	5.24	5.24	0	0	0	0
AT5G16560	5.24	0	5.24	3.56	0	0
AT5G17430	5.24	5.24	0	0	0	0
AT5G17440	5.24	0	5.24	0	0	0
AT2G18969	5.23	0	0	5.23	0	3.16
AT2G18970	5.23	0	0	3.16	4.37	5.23
AT2G22760	5.23	0	5.23	3.95	0	4.11
AT3G06500	5.23	0	0	5.23	0	0
AT1G03980	5.22	5.22	3.03	0	0	0
AT1G03982	5.22	0	0	5.22	0	0
AT1G03990	5.22	0	0	5.22	0	0
AT1G32710	5.22	5.22	0	0	0	0
AT4G37070	5.22	5.22	4.04	0	3.52	0
AT5G06250	5.22	0	0	0	5.22	0
AT5G64530	5.22	5.22	4.55	0	0	0
AT1G01570	5.21	0	0	0	0	5.21
AT1G01580	5.21	0	5.21	0	0	0
AT1G54740	5.21	0	0	0	5.21	4.37
AT1G54760	5.21	5.21	4.37	0	0	0
AT1G54770	5.21	5.21	0	0	0	0
AT2G42880	5.21	3.15	0	0	0	5.21
AT4G00480	5.21	3.14	5.21	0	0	0
AT4G00490	5.21	0	4.81	5.21	0	0
AT5G16140	5.21	0	0	5.21	0	0
AT5G16150	5.21	0	0	5.21	0	0
AT1G01470	5.2	0	0	5.2	0	0
AT1G01471	5.2	0	0	4.96	0	5.2
AT1G01480	5.2	5.2	0	0	3.3	0
AT2G36430	5.2	0	0	0	5.2	0
AT2G36440	5.2	0	5.2	0	0	0
AT4G33700	5.2	0	0	5.2	0	0
AT4G33710	5.2	0	5.2	0	0	0
AT5G13730	5.2	0	4.99	5.2	0	0
AT5G13740	5.2	0	5.2	3.22	4.99	0
AT2G23100	5.19	3.03	0	5.19	0	0
AT2G23110	5.19	0	0	5.19	0	0
AT4G13330	5.19	0	5.19	0	0	0
AT4G13340	5.19	0	5.19	3.21	0	0
AT5G17810	5.19	3.09	5.19	0	0	0
AT1G72300	5.18	3.02	0	5.18	0	0
AT2G20190	5.18	0	0	0	0	5.18
AT3G13520	5.17	0	0	5.17	0	0
AT3G13525	5.17	5.17	0	0	0	0
AT4G37820	5.17	0	5.17	0	0	0
AT2G14880	5.16	0	0	0	0	5.16
AT3G21720	5.16	0	5.16	0	0	0
AT3G61678	5.16	0	0	5.16	0	0
AT3G61680	5.16	0	0	0	5.16	0
AT5G37540	5.16	0	0	5.16	0	0
AT5G44010	5.16	5.16	3.94	0	0	0
AT5G44020	5.16	3.94	0	5.16	0	0
AT1G04240	5.15	0	5.15	4.31	0	0
AT1G71960	5.15	0	0	0	5.15	0
AT3G46530	5.15	5.15	0	0	0	0
AT3G46540	5.15	3.79	0	5.15	0	0
AT3G46550	5.15	0	0	3.79	0	5.15
AT3G46560	5.15	5.15	0	3.79	0	0
AT4G18980	5.15	0	0	5.15	0	3.02
AT5G60880	5.15	5.15	3.43	0	0	0
AT5G60890	5.15	5.15	3.41	3.66	0	0
AT5G62950	5.15	5.15	0	0	0	0
AT5G62960	5.15	5.15	0	0	0	0
AT2G27550	5.14	0	5.14	3.32	0	0
AT5G67390	5.14	4.34	0	5.14	0	3.1
AT1G23020	5.13	5.06	5.13	0	0	0
AT1G23030	5.13	0	5.13	5.06	0	3.08
AT3G02540	5.13	5.13	3.31	0	0	0
AT3G02550	5.13	0	3.03	5.13	3.31	0
AT5G07000	5.13	0	5.13	0	0	0
AT5G08330	5.13	0	4.46	5.13	0	0
AT5G08335	5.13	5.13	3.53	0	0	0
AT5G11640	5.13	0	4.3	0	0	5.13
AT5G11650	5.13	0	0	5.13	0	0
AT3G23740	5.12	4.29	0	5.12	0	0
AT3G23750	5.12	5.12	4.29	0	0	0
AT4G06744	5.12	0	0	0	0	5.12
AT5G24090	5.12	0	5.12	0	0	0
AT5G24100	5.12	0	5.12	3.03	0	0
AT5G44210	5.12	0	0	0	3.3	5.12
AT5G44220	5.12	5.12	3.67	0	0	0
AT5G61440	5.12	0	0	5.12	0	0
AT5G61445	5.12	5.12	0	0	0	0
AT4G37770	5.11	3.15	0	0	0	5.11
AT5G22570	5.11	0	5.11	0	0	0
AT1G05870	5.1	0	0	5.1	0	0
AT1G05880	5.1	3.5	5.1	0	0	0
AT1G19220	5.1	0	5.1	0	0	3.73
AT1G78850	5.1	3.65	0	5.1	0	0
AT1G79120	5.1	0	0	0	5.1	0
AT2G20340	5.1	0	0	0	0	5.1
AT2G20350	5.1	0	5.1	0	0	0
AT2G20360	5.1	5.1	0	0	0	0
AT5G59220	5.1	5.1	4.27	3.21	0	0
AT5G59230	5.1	5.1	0	0	0	0
AT2G36270	5.09	0	0	5.09	3.81	0
AT2G36280	5.09	0	0	0	0	5.09
AT2G36290	5.09	0	0	0	0	5.09
AT5G06970	5.09	0	0	5.09	0	0
AT5G06980	5.09	0	0	5.09	0	0
AT5G06990	5.09	5.09	0	0	0	0
AT5G13090	5.09	0	5.09	0	0	0
AT5G13100	5.09	0	0	5.09	0	0
AT5G13110	5.09	5.09	0	0	0	0
AT5G16110	5.09	5.09	0	0	0	0
AT5G16120	5.09	0	0	5.09	0	0
AT5G16130	5.09	5.09	0	0	0	0
AT1G79530	5.06	0	0	5.06	0	0
AT1G79540	5.06	0	0	0	0	5.06
AT2G04675	5.06	0	5.06	0	0	0
AT2G29420	5.06	5.06	0	0	0	0
AT2G29440	5.06	0	0	5.06	0	0
AT2G43140	5.06	0	0	4.05	5.06	0
AT3G02590	5.06	5.06	0	0	0	5.04
AT3G24503	5.06	0	0	5.06	0	0
AT3G50650	5.06	3.02	5.06	4	0	3.14
AT4G20300	5.06	0	0	0	5.06	0
AT4G20310	5.06	5.06	0	0	0	0
AT4G21270	5.06	5.06	0	0	0	0
AT4G21280	5.06	0	0	0	0	5.06
AT4G21300	5.06	0	0	5.06	0	0
AT5G06370	5.06	5.06	0	0	0	0
AT5G06380	5.06	0	0	0	0	5.06
AT5G06390	5.06	0	5.06	0	0	0
AT1G03457	5.05	0	0	5.05	0	0
AT1G04990	5.05	0	5.05	0	0	0
AT1G05000	5.05	5.05	0	0	0	0
AT1G10190	5.05	5.05	0	0	0	0
AT1G10200	5.05	0	0	5.05	0	0
AT1G10210	5.05	0	3.16	5.05	0	0
AT1G77980	5.05	5.05	0	0	0	0
AT1G77990	5.05	0	0	0	5.05	0
AT2G03730	5.05	0	3.25	3.62	0	5.05
AT2G36690	5.05	3.21	5.05	0	0	0
AT3G46280	5.05	0	0	5.05	0	0
AT3G54190	5.05	3.17	0	5.05	0	0
AT3G54200	5.05	0	3.32	5.05	0	3.17
AT5G16200	5.05	0	0	5.05	0	0
AT5G16210	5.05	0	0	0	3.08	5.05
AT5G16567	5.05	3.4	5.05	0	3.35	3.08
AT5G56240	5.05	0	3.75	5.05	0	0
AT1G06840	5.04	0	5.04	0	0	0
AT1G06850	5.04	0	0	5.04	0	0
AT1G11735	5.04	3.74	3.41	5.04	0	4.52
AT1G11740	5.04	0	0	0	3.74	5.04
AT1G12700	5.04	5.04	0	0	0	0
AT1G12710	5.04	0	0	5.04	0	0
AT2G27080	5.04	0	0	0	5.04	0
AT2G33175	5.04	5.04	0	3.52	0	0
AT2G33180	5.04	0	0	5.04	0	0
AT2G33190	5.04	5.04	0	0	0	0
AT2G36220	5.04	5.04	4.82	0	0	0
AT3G02600	5.04	0	0	5.04	0	0
AT3G04060	5.04	5.04	0	0	0	0
AT3G07340	5.04	5.04	0	3.31	0	0
AT3G10880	5.04	0	0	5.04	0	0
AT3G14550	5.04	5.04	0	0	0	0
AT3G14560	5.04	0	4.98	5.04	0	0
AT3G52790	5.04	0	5.04	0	0	0
AT3G52800	5.04	0	5.04	0	0	0
AT4G10260	5.04	0	3.91	5.04	0	0
AT4G10265	5.04	0	3	5.04	0	0
AT4G10270	5.04	0	5.04	3.91	0	0
AT5G02550	5.04	0	4.93	0	5.04	0
AT5G02560	5.04	5.04	0	4.93	0	0
AT1G58270	5.03	0	0	5.03	0	3.22
AT1G62490	5.03	5.03	3.33	0	0	0
AT1G62500	5.03	0	0	0	3.33	5.03
AT1G76980	5.03	0	5.03	0	0	0
AT2G01560	5.03	4.59	5.03	0	0	0
AT2G28830	5.03	0	5.03	0	0	0
AT2G32130	5.03	5.03	0	0	0	0
AT2G32140	5.03	0	5.03	0	0	0
AT2G32150	5.03	0	0	5.03	0	0
AT2G44940	5.03	5.03	4.31	4.16	0	3.31
AT3G17510	5.03	5.03	0	0	0	0
AT3G49570	5.03	0	0	5.03	0	0
AT4G34410	5.03	3.81	5.03	3.13	0	0
AT5G03745	5.03	5.03	0	0	0	0
AT3G58620	5.02	3.14	5.02	0	0	0
AT1G07410	5.01	0	0	0	0	5.01
AT1G07420	5.01	0	0	5.01	0	0
AT1G08845	5.01	0	0	0	0	5.01
AT1G08860	5.01	0	0	5.01	3.18	0
AT1G14440	5.01	3.32	5.01	0	0	3.13
AT1G66390	5.01	0	0	0	5.01	0
AT1G70940	5.01	0	4.37	5.01	3.33	0
AT2G17850	5.01	0	5.01	3.69	0	0
AT2G17860	5.01	3.9	0	0	0	5.01
AT2G21400	5.01	0	0	5.01	0	0
AT3G10525	5.01	5.01	0	0	0	0
AT3G10530	5.01	0	5.01	0	0	0
AT3G19660	5.01	0	5.01	0	0	0
AT3G19663	5.01	0	0	0	0	5.01
AT4G02160	5.01	0	5.01	0	0	0
AT4G02170	5.01	0	3.51	5.01	0	0
AT4G02180	5.01	5.01	0	0	0	0
AT4G08150	5.01	5.01	0	0	0	0
AT4G08151	5.01	0	5.01	0	0	0
AT5G46320	5.01	3.81	5.01	0	0	0
AT5G46325	5.01	0	0	5.01	0	3.25
AT5G46330	5.01	0	5.01	3.81	0	0
AT5G57690	5.01	3.09	0	0	0	5.01
AT5G65800	5.01	3.88	3.26	5.01	0	0
AT1G77680	5	5	0	0	0	0
AT1G77682	5	2.99	5	0	0	0
AT2G46530	5	5	0	0	0	3.03
AT5G67411	5	5	0	0	0	3.47
AT2G26730	4.99	0	0	0	4.99	0
AT1G01600	4.98	0	0	0	4.98	0
AT1G69295	4.98	0	0	4.98	0	0
AT1G74440	4.98	4.04	4.98	3.6	3.76	0
AT1G74448	4.98	0	0	4.04	4.98	3.58
AT1G74450	4.98	0	3.6	4.98	4.04	0
AT3G08630	4.98	0	0	0	0	4.98
AT3G08636	4.98	0	0	0	4.98	0
AT3G08640	4.98	0	0	4.98	0	0
AT4G02530	4.98	4.98	0	0	0	0
AT4G02540	4.98	0	0	4.98	0	0
AT4G36850	4.98	0	4.98	0	0	0
AT4G36860	4.98	0	4.22	0	0	4.98
AT5G15220	4.98	0	4.98	4.81	0	0
AT5G15230	4.98	0	4.98	0	0	0
AT5G04470	4.97	4.97	4	0	0	0
AT1G66890	4.96	0	0	4.96	0	0
AT1G66900	4.96	0	4.96	0	0	0
AT2G18350	4.96	0	4.96	3.43	0	0
AT3G13784	4.96	0	4.96	0	0	0
AT3G51750	4.96	0	0	4.96	0	0
AT3G51760	4.96	0	0	0	4.96	0
AT5G43020	4.96	0	0	4.96	0	0
AT1G65900	4.95	0	0	4.95	0	0
AT1G65907	4.95	0	4.95	0	0	0
AT1G75295	4.95	0	4.95	0	0	0
AT1G75310	4.95	4.95	0	0	0	0
AT1G80530	4.95	0	0	4.95	0	0
AT1G80540	4.95	0	0	0	0	4.95
AT2G24570	4.95	3.57	4.95	0	0	0
AT3G18165	4.95	0	0	0	0	4.95
AT3G18170	4.95	4.95	0	0	0	0
AT2G45700	4.94	4.94	0	0	0	0
AT2G45710	4.94	0	0	0	0	4.94
AT2G45720	4.94	0	0	4.94	0	0
AT4G33990	4.94	4.94	0	0	0	3.46
AT4G34000	4.94	0	0	4.94	0	0
AT2G02450	4.93	0	4.93	3.89	0	0
AT3G59060	4.93	0	3.84	4.93	0	0
AT4G34770	4.93	0	4.93	0	0	0
AT2G41850	4.92	0	4.92	3.35	0	0
AT5G06839	4.92	0	0	0	4.92	0
AT5G22090	4.92	0	4.92	0	0	0
AT2G42580	4.91	4.91	4.67	4.83	0	0
AT5G47250	4.91	0	0	4.91	0	0
AT5G47260	4.91	0	0	4.91	0	0
AT1G49450	4.9	0	0	0	4.9	0
AT1G49460	4.9	0	4.9	0	0	0
AT2G17670	4.9	0	0	0	0	4.9
AT2G17680	4.9	4.9	0	0	0	0
AT3G30180	4.9	0	0	0	4.9	0
AT3G50050	4.9	4.9	0	0	0	0
AT4G30350	4.9	0	0	0	0	4.9
AT1G26920	4.89	4.89	0	3.81	0	0
AT1G73660	4.89	0	0	4.89	0	0
AT1G73670	4.89	2.99	4.89	0	0	0
AT1G79150	4.89	3.53	0	4.89	0	0
AT2G26360	4.89	4.89	0	0	0	0
AT2G26370	4.89	0	0	0	4.89	0
AT3G61826	4.89	0	0	4.89	0	3.04
AT3G61827	4.89	0	0	0	4.89	3.04
AT3G61829	4.89	0	0	0	0	4.89
AT3G61830	4.89	0	3.04	4.89	0	0
AT4G39410	4.89	0	0	0	0	4.89
AT5G11740	4.89	0	4.03	4.89	0	0
AT5G62370	4.89	0	4.89	0	0	0
AT1G06570	4.88	0	0	4.88	0	0
AT1G06580	4.88	0	0	0	0	4.88
AT1G22400	4.88	0	0	4.88	0	0
AT2G20370	4.88	0	0	4.88	0	0
AT5G07990	4.88	4.88	0	0	0	0
AT1G13350	4.87	0	4.87	0	0	0
AT1G13360	4.87	3.79	0	4.87	0	0
AT1G28140	4.87	0	0	0	0	4.87
AT1G29350	4.87	0	0	0	0	4.87
AT1G54385	4.87	0	0	4.87	0	0
AT1G54390	4.87	0	0	0	0	4.87
AT2G22510	4.87	0	0	0	0	4.87
AT3G54000	4.87	0	0	0	0	4.87
AT3G54010	4.87	0	4.87	0	0	0
AT4G11280	4.87	3	4.87	0	0	0
AT4G25790	4.87	0	0	0	0	4.87
AT1G25220	4.86	4.86	0	0	0	0
AT1G76080	4.86	0	3.46	4.86	0	0
AT3G11590	4.86	4.86	0	0	0	0
AT3G13960	4.86	0	0	4.86	0	0
AT4G17610	4.86	0	4.86	0	0	0
AT4G17612	4.86	0	4.86	0	0	0
AT4G17615	4.86	0	0	4.86	0	0
AT5G13400	4.86	0	0	4.86	0	0
AT5G13410	4.86	0	0	0	0	4.86
AT5G46720	4.86	0	4.86	0	0	0
AT5G51200	4.86	0	0	0	0	4.86
AT5G51210	4.86	0	0	4.86	0	0
AT2G28405	4.85	0	0	0	0	4.85
AT4G25500	4.85	0	4.17	4.85	0	0
AT4G36500	4.85	0	0	4.85	0	0
AT4G36510	4.85	0	4.85	0	0	0
AT5G14105	4.85	0	4.85	0	0	0
AT5G14110	4.85	0	0	4.85	0	0
AT5G14120	4.85	0	0	4.85	0	0
AT1G13245	4.84	3.89	4.61	4.84	0	4.53
AT2G22802	4.84	0	4.84	0	0	0
AT2G22805	4.84	0	4.84	0	0	0
AT4G36030	4.84	0	3.44	4.84	0	0
AT1G12050	4.83	0	0	0	0	4.83
AT1G12060	4.83	0	0	0	0	4.83
AT1G12064	4.83	0	0	0	0	4.83
AT1G16500	4.83	0	0	4.83	0	0
AT1G37140	4.83	0	4.83	0	0	0
AT1G66370	4.83	0	0	0	3.1	4.83
AT1G66380	4.83	4.83	0	0	0	0
AT1G68825	4.83	0	4.83	0	0	0
AT1G68830	4.83	3.76	4	0	0	4.83
AT2G32430	4.83	4.83	0	0	0	0
AT2G35260	4.83	0	0	0	0	4.83
AT2G46720	4.83	0	0	0	4.4	4.83
AT3G06483	4.83	0	4.83	0	0	0
AT3G28180	4.83	4.83	0	4	0	0
AT3G45260	4.83	0	0	4.83	3.21	0
AT3G62680	4.83	0	0	0	0	4.83
AT3G62690	4.83	0	4.49	3.32	0	4.83
AT4G14980	4.83	0	3.73	4.83	0	0
AT5G03150	4.83	0	0	3.76	4.83	0
AT5G39770	4.83	4.83	0	0	0	0
AT5G39785	4.83	0	0	0	4.83	0
AT5G43650	4.83	0	0	4.43	4.83	0
AT1G12610	4.82	0	4.82	3.2	0	0
AT1G27050	4.82	0	0	0	4.82	0
AT1G27060	4.82	0	4.82	0	0	0
AT1G80820	4.82	0	0	0	4.82	0
AT1G80830	4.82	0	0	3.19	0	4.82
AT2G41312	4.82	0	0	4.82	0	0
AT2G41330	4.82	0	4.82	0	0	0
AT3G04910	4.82	0	4.82	3.96	3.28	4.74
AT3G49970	4.82	0	4.82	0	0	4
AT3G49980	4.82	0	0	0	0	4.82
AT4G36920	4.82	4.82	3.22	0	0	0
AT5G39080	4.82	0	0	4.82	0	0
AT5G39090	4.82	4.82	0	0	0	0
AT5G39240	4.82	0	0	4.82	0	0
AT5G51790	4.82	0	4.82	3.73	0	0
AT1G13110	4.81	0	3.48	4.81	0	0
AT1G70209	4.81	0	0	0	0	4.81
AT1G01620	4.8	0	3.96	4.8	0	0
AT1G01630	4.8	0	4.26	4.8	0	0
AT1G53180	4.8	0	0	3.46	4.8	3.25
AT3G27250	4.8	0	0	0	3.71	4.8
AT3G27580	4.8	0	4.8	0	0	0
AT3G27590	4.8	0	0	0	4.8	0
AT3G61150	4.8	0	3.2	0	4.8	0
AT3G61160	4.8	0	4.8	0	0	0
AT4G36360	4.8	4.8	0	3.78	0	0
AT5G03890	4.8	3.24	0	4.8	0	0
AT5G03900	4.8	4.8	0	0	0	0
AT5G38200	4.8	0	0	4.8	0	0
AT5G52900	4.8	0	0	3.53	4.8	0
AT5G52901	4.8	0	4.8	3.53	3.1	0
AT5G57670	4.8	4.41	4.04	0	0	4.8
AT1G74430	4.79	4.79	0	0	0	3.76
AT1G76420	4.79	0	4.79	0	4.72	0
AT3G13310	4.79	0	0	4.79	0	0
AT3G13320	4.79	4.79	0	0	0	0
AT3G47790	4.79	0	0	0	0	4.79
AT3G47800	4.79	0	0	4.79	0	0
AT4G16490	4.79	0	4.79	3.61	0	0
AT4G28025	4.79	4.79	0	0	0	0
AT4G28030	4.79	0	0	4.79	0	0
AT4G28040	4.79	0	0	4.79	0	0
AT4G30190	4.79	3.14	4.79	0	0	4.29
AT5G59730	4.79	0	4.79	3.44	0	3.03
AT1G14600	4.78	0	0	0	4.78	0
AT1G44830	4.78	4.78	0	3.52	0	0
AT3G11680	4.78	4.78	0	0	0	0
AT3G11690	4.78	4.78	0	0	0	0
AT3G56880	4.78	3.11	0	4.78	0	3.89
AT5G08505	4.78	0	0	4.78	0	0
AT5G08510	4.78	0	0	4.78	0	0
AT5G12330	4.78	0	0	4.78	0	0
AT5G41400	4.78	0	0	0	0	4.78
AT1G01490	4.77	3.96	0	4.77	3.39	0
AT1G01500	4.77	4.77	4.68	3.96	0	0
AT1G28280	4.77	0	0	0	0	4.77
AT1G28281	4.77	4.77	0	0	0	0
AT1G29370	4.77	0	0	0	4.77	0
AT1G69270	4.77	0	0	4.77	0	0
AT1G77932	4.77	4.77	0	0	0	0
AT1G77940	4.77	0	0	4.77	0	0
AT1G77950	4.77	0	0	4.77	0	0
AT1G79060	4.77	0	0	3.32	4.77	0
AT1G79075	4.77	4.77	0	0	0	0
AT2G04031	4.77	0	4.77	0	0	0
AT2G04037	4.77	0	0	4.77	0	0
AT2G05520	4.77	3.45	3.42	0	0	4.77
AT2G05530	4.77	4.77	0	0	0	0
AT2G25120	4.77	0	0	0	4.77	0
AT2G30840	4.77	4.77	0	0	0	0
AT2G30850	4.77	0	4.77	0	0	0
AT2G30860	4.77	0	0	4.77	0	0
AT2G30870	4.77	4.77	0	0	0	0
AT2G42140	4.77	4.77	0	0	0	0
AT2G42150	4.77	0	0	4.77	3.9	0
AT4G11290	4.77	0	2.99	0	4.77	0
AT4G11300	4.77	0	3.68	0	0	4.77
AT4G21200	4.77	0	0	4.77	0	0
AT4G32940	4.77	0	0	4.77	0	0
AT4G32950	4.77	0	0	0	0	4.77
AT5G43870	4.77	0	0	4.77	0	0
AT5G49620	4.77	0	0	0	0	4.77
AT1G03470	4.76	0	0	4.76	0	0
AT1G03475	4.76	0	0	0	0	4.76
AT1G12500	4.76	0	4.76	0	0	0
AT1G12510	4.76	0	0	0	0	4.76
AT1G12520	4.76	0	0	0	0	4.76
AT1G53700	4.76	0	4.76	0	0	0
AT1G78260	4.76	3.04	4.27	3.21	4.76	0
AT1G78265	4.76	4.09	4.76	0	0	0
AT1G78270	4.76	0	0	0	0	4.76
AT1G78280	4.76	4.76	0	0	0	0
AT2G22426	4.76	0	0	0	3.98	4.76
AT2G38240	4.76	3.22	3.32	0	4.76	0
AT3G12930	4.76	0	0	4.76	0	0
AT3G48690	4.76	0	0	4.76	0	0
AT3G48700	4.76	0	0	0	3.54	4.76
AT3G48710	4.76	4.76	0	0	0	0
AT4G22730	4.76	0	0	4.76	0	0
AT4G28720	4.76	0	0	4.76	0	0
AT5G03310	4.76	0	4.76	4.09	0	0
AT5G03320	4.76	0	4.09	4.76	0	0
AT5G17640	4.76	0	0	4.76	0	0
AT5G28642	4.76	0	4.76	0	0	0
AT3G10720	4.75	0	0	3.13	4.75	0
AT4G39850	4.75	0	3.06	4.75	0	0
AT1G14290	4.74	0	0	4.74	0	3.53
AT1G14300	4.74	0	0	0	3.03	4.74
AT1G14310	4.74	4.74	0	0	0	0
AT1G14850	4.74	3.32	4.74	0	0	0
AT1G65820	4.74	0	0	0	0	4.74
AT1G65830	4.74	0	0	4.74	0	0
AT1G65840	4.74	3.33	4.74	0	0	0
AT2G01905	4.74	0	0	0	4.74	0
AT2G41870	4.74	0	0	4.74	0	0
AT2G41880	4.74	0	4.74	0	0	0
AT2G45950	4.74	3.41	4.74	4.38	0	0
AT2G45960	4.74	0	4.38	4.74	0	0
AT2G47710	4.74	0	4.74	0	0	0
AT2G47720	4.74	0	0	0	0	4.74
AT2G47730	4.74	0	0	0	4.74	0
AT3G52440	4.74	0	0	0	0	4.74
AT4G01570	4.74	0	0	0	0	4.74
AT4G01575	4.74	0	0	4.74	0	0
AT4G01580	4.74	4.74	0	0	0	0
AT5G11090	4.74	4.74	0	0	0	0
AT5G54760	4.74	0	0	0	0	4.74
AT5G54770	4.74	0	0	4.74	0	0
AT5G57010	4.74	0	0	4.18	0	4.74
AT5G57015	4.74	0	0	4.74	0	0
AT5G66310	4.74	0	0	4.74	3.51	0
AT1G20350	4.73	4.73	0	0	0	0
AT5G64270	4.73	0	4.73	0	0	0
AT2G46780	4.72	0	4.72	0	0	3.39
AT3G23090	4.72	0	0	0	4.02	4.72
AT3G53420	4.72	4.47	4.72	0	0	0
AT4G19040	4.72	0	0	4.72	0	0
AT4G19045	4.72	0	0	0	0	4.72
AT4G23432	4.72	0	0	0	4.72	0
AT4G24025	4.72	4.72	0	0	0	0
AT4G24030	4.72	4.72	0	0	0	0
AT4G24040	4.72	0	0	0	4.72	0
AT5G09975	4.72	0	0	4.72	0	0
AT5G09976	4.72	0	0	4.72	0	0
AT5G09978	4.72	4.72	0	0	0	3.14
AT5G22555	4.72	0	0	0	0	4.72
AT5G22560	4.72	0	0	0	0	4.72
AT5G43410	4.72	0	4.72	0	0	0
AT5G57230	4.72	0	0	3.35	0	4.72
AT5G57240	4.72	0	0	4.72	0	0
AT5G65630	4.72	0	4.72	4.14	0	0
AT1G69790	4.71	4.71	0	0	0	0
AT1G70750	4.71	0	4.71	0	3.87	0
AT1G70760	4.71	4.71	0	0	0	0
AT1G73830	4.71	0	0	0	4.71	0
AT3G43430	4.71	4.71	4.5	0	0	0
AT3G43431	4.71	0	4.71	0	0	0
AT4G22000	4.71	0	4.71	4	0	2.99
AT4G22010	4.71	0	4	4.71	0	0
AT5G49370	4.71	4.71	0	0	0	0
AT1G09730	4.7	4.7	0	0	0	0
AT1G09740	4.7	0	0	0	0	4.7
AT1G09750	4.7	0	0	4.7	0	0
AT1G72140	4.7	0	0	4.7	0	0
AT2G04500	4.7	0	4.7	0	0	0
AT2G06925	4.7	0	0	0	0	4.7
AT2G28560	4.7	4.7	0	0	0	0
AT2G28570	4.7	0	0	4.7	0	0
AT2G29125	4.7	0	4.32	0	0	4.7
AT2G29130	4.7	0	3.66	0	0	4.7
AT2G38465	4.7	0	4.7	0	0	0
AT2G38470	4.7	0	0	4.7	0	0
AT4G31330	4.7	0	0	4.7	0	0
AT5G11670	4.7	0	0	4.7	0	0
AT5G67180	4.7	4.7	0	0	0	0
AT1G30016	4.69	0	0	0	0	4.69
AT1G55690	4.69	4.63	3.36	4.69	0	0
AT1G76878	4.69	0	3.35	4.69	0	0
AT1G76880	4.69	0	4.68	0	3.53	4.69
AT2G18950	4.69	0	0	0	0	4.69
AT2G36310	4.69	0	4.69	0	0	0
AT2G36320	4.69	0	0	4.69	0	0
AT2G36325	4.69	4.69	0	0	0	0
AT2G40980	4.69	4.69	4.32	0	0	0
AT3G18990	4.69	0	0	4.69	0	0
AT3G19002	4.69	4.69	0	0	0	0
AT4G30390	4.69	3.47	0	4.69	0	0
AT4G30400	4.69	4.69	3.47	0	0	3.8
AT5G10420	4.69	4.69	3.47	0	0	0
AT5G10430	4.69	0	0	4.69	0	0
AT5G18860	4.69	0	4.69	0	0	0
AT5G20620	4.69	4.69	0	0	0	0
AT5G20630	4.69	0	4.69	0	0	0
AT5G62090	4.69	0	0	4.69	0	0
AT5G62100	4.69	0	0	4.69	0	0
AT5G66810	4.69	0	4.69	0	0	0
AT1G28306	4.68	4.68	0	0	0	0
AT1G66600	4.68	4.03	4.68	4.57	0	0
AT1G77730	4.68	0	0	0	0	4.68
AT1G77810	4.68	4.68	0	0	0	0
AT1G77815	4.68	4.68	0	0	0	0
AT1G77840	4.68	4.68	0	0	0	3.73
AT2G04100	4.68	4.68	0	0	0	0
AT2G15480	4.68	0	0	3.42	0	4.68
AT2G15490	4.68	0	0	4.68	0	0
AT2G15500	4.68	4.68	0	0	0	0
AT2G22570	4.68	0	0	4.68	0	0
AT2G22580	4.68	0	0	0	0	4.68
AT2G22590	4.68	0	4.68	0	0	0
AT2G23610	4.68	3.52	0	4.68	0	0
AT2G23620	4.68	0	0	3.52	0	4.68
AT2G24600	4.68	0	4.68	0	0	0
AT2G24610	4.68	0	0	4.68	0	0
AT2G27070	4.68	0	0	0	4.68	0
AT2G36830	4.68	0	4.68	3.66	0	0
AT3G13060	4.68	0	4.68	0	0	0
AT3G14350	4.68	0	4.68	0	0	0
AT3G14360	4.68	4.68	0	0	0	0
AT3G20015	4.68	0	0	0	0	4.68
AT3G23250	4.68	0	4.47	4.52	0	4.68
AT3G23255	4.68	4.52	0	4.68	0	0
AT3G23260	4.68	4.68	0	0	0	0
AT3G24210	4.68	4.68	0	0	0	0
AT3G24216	4.68	0	0	0	0	4.68
AT3G24220	4.68	4.68	0	0	0	0
AT3G46100	4.68	0	0	4.68	0	0
AT3G46110	4.68	0	0	4.68	0	0
AT3G48190	4.68	0	0	4.68	0	0
AT3G48330	4.68	4.68	0	0	0	0
AT3G48340	4.68	0	4.68	0	0	0
AT4G14990	4.68	0	0	4.68	0	3.73
AT4G15000	4.68	0	4.68	0	0	0
AT4G19380	4.68	0	4.68	0	0	0
AT4G21215	4.68	0	0	0	4.68	0
AT4G21390	4.68	0	0	4.68	0	0
[truncated: 2,303 more rows]

## Sheet: C
Figure 1-source data 1C Previous PIF4 ChIP-seq result (Oh et al., 2012) was re-analyzed with same statistical method as described in Figure1-source data 1A, to define PIF4 target genes.
Gene	max3kb1kb	u3000	u2000	u1000	d0	d1000
AT5G02570	190.98	190.98	6.24	0	0	0
AT5G02580	190.98	0	6.24	190.98	0	19.87
AT5G57670	162.14	0	0	0	0	162.14
AT3G05890	97.92	0	97.92	0	0	10.39
AT3G05905	97.92	0	97.92	6.83	17.3	0
AT1G20780	95.94	0	0	7.56	0	95.94
AT1G20790	95.94	0	0	0	95.94	0
AT5G54470	94.76	0	0	94.76	0	0
AT5G54480	94.76	0	94.76	0	0	0
AT2G42870	92.78	21.45	92.78	11.97	0	0
AT2G23770	85.67	0	0	0	0	85.67
AT3G29575	79.74	11.57	0	79.74	0	0
AT4G14130	76.58	6.43	76.58	11.77	0	0
AT5G02530	75.2	0	0	75.2	0	0
AT5G02540	75.2	75.2	0	0	6.24	15.13
AT3G23020	66.11	66.11	0	0	0	11.77
AT3G23030	66.11	15.92	45.16	66.11	0	0
AT1G02340	63.54	0	63.54	10.98	0	0
AT1G02350	63.54	0	10.98	63.54	0	9.99
AT3G60400	63.54	63.54	34.1	0	0	0
AT3G21320	62.55	0	62.55	18.49	0	0
AT3G62090	61.36	0	0	61.36	0	0
AT1G13950	59.59	0	0	59.59	0	0
AT3G12920	59.59	6.83	0	59.59	6.43	11.77
AT4G03010	58.99	0	0	58.99	0	0
AT3G63430	58.01	0	7.82	0	0	58.01
AT3G63440	58.01	0	58.01	8.61	0	0
AT3G63445	58.01	6.43	0	0	58.01	0
AT3G57800	55.63	55.63	0	0	8.41	6.83
AT3G57810	55.63	55.63	0	6.87	0	0
AT5G07010	55.44	55.44	0	12.76	19.08	0
AT5G21940	55.24	0	55.24	10.58	7.03	6.63
AT2G31970	54.45	0	0	0	0	54.45
AT2G31980	54.45	0	0	54.45	0	0
AT2G31981	54.45	0	0	0	54.45	0
AT3G12700	54.45	0	0	0	0	54.45
AT3G12710	54.45	0	0	12.76	0	54.45
AT4G36860	54.45	0	54.45	0	0	0
AT4G17453	52.08	0	0	0	52.08	0
AT4G17460	52.08	0	52.08	0	0	0
AT4G18710	51.09	0	12.36	0	51.09	0
AT2G01150	50.89	6.63	0	50.89	0	6.63
AT2G01160	50.89	0	50.89	0	0	6.63
AT3G19390	50.1	50.1	0	8.02	0	0
AT1G67590	49.9	0	0	49.9	0	0
AT3G58620	49.31	0	49.31	0	0	0
AT4G25090	49.31	49.31	0	8.21	0	0
AT4G25100	49.31	0	0	0	49.31	8.21
AT5G63650	49.31	0	0	26.79	49.31	0
AT5G63660	49.31	0	49.31	0	0	0
AT2G46520	49.11	6.43	9	0	0	49.11
AT3G45780	49.11	0	49.11	11.18	15.72	0
AT1G78690	48.92	0	0	0	0	48.92
AT1G78700	48.92	0	0	48.92	0	12.76
AT1G78710	48.92	48.92	0	0	12.76	0
AT5G28300	48.92	0	48.92	7.82	8.81	0
AT5G60670	48.92	48.92	14.54	0	0	0
AT5G60680	48.92	8.41	48.92	0	0	6.63
AT5G44440	48.13	0	48.13	0	0	0
AT5G44450	48.13	0	22.44	0	0	48.13
AT4G27435	47.73	0	0	0	0	47.73
AT4G27440	47.73	0	0	47.73	7.62	0
AT1G26771	46.94	46.94	0	0	0	0
AT1G26773	46.94	0	0	0	0	46.94
AT2G43010	46.94	0	8.21	46.94	0	9.6
AT1G14860	46.74	0	0	0	0	46.74
AT5G11970	46.55	0	10.19	46.55	0	0
AT5G11977	46.55	46.55	10.19	0	0	0
AT1G13240	45.76	0	45.76	7.86	0	0
AT3G50790	45.36	0	45.36	8.02	0	0
AT3G50800	45.36	0	0	45.36	0	8.02
AT1G06070	44.96	0	0	44.96	0	0
AT4G33990	44.96	44.96	0	0	0	0
AT4G34000	44.96	0	0	44.96	0	0
AT5G26146	44.96	44.96	0	0	0	0
AT5G26147	44.96	44.96	0	0	0	0
AT3G47430	44.17	44.17	0	0	0	0
AT4G39090	43.38	0	0	43.38	0	0
AT4G39100	43.38	0	0	0	0	43.38
AT1G28330	43.19	0	0	43.19	0	0
AT1G28335	43.19	0	0	43.19	0	0
AT4G17420	43.19	0	0	43.19	0	0
AT4G17430	43.19	0	0	0	0	43.19
AT4G03190	42.79	0	0	42.79	0	0
AT4G03200	42.79	0	0	42.79	0	0
AT1G16870	42.59	42.59	0	8.81	0	0
AT1G16880	42.59	0	0	8.81	42.59	6.24
AT1G16890	42.59	0	0	0	6.24	42.59
AT1G73830	42	0	0	0	42	0
AT5G10990	42	0	0	0	0	42
AT5G11000	42	0	0	0	0	42
AT5G08130	41.41	41.41	13.75	0	0	0
AT5G42740	41.41	0	0	0	0	41.41
AT1G21060	41.21	41.21	10.19	0	0	0
AT3G04850	41.21	0	41.21	0	0	0
AT3G04854	41.21	0	0	0	0	41.21
AT3G04855	41.21	0	0	41.21	0	0
AT1G11960	41.01	0	0	41.01	0	0
AT1G11970	41.01	0	0	0	41.01	0
AT1G11980	41.01	0	41.01	0	0	0
AT5G12040	41.01	0	0	0	0	41.01
AT5G12043	41.01	0	0	0	0	41.01
AT5G12050	41.01	0	41.01	0	0	0
AT1G18400	40.82	0	0	19.87	40.82	7.03
AT1G68010	40.82	0	0	0	0	40.82
AT1G68020	40.82	0	0	40.82	0	0
AT1G33060	40.22	0	0	40.22	0	0
AT5G54590	40.02	40.02	0	0	0	0
AT4G25480	39.83	39.83	0	6.63	0	14.14
AT4G25490	39.83	0	0	20.46	0	39.83
AT4G27710	39.83	0	0	0	0	39.83
AT4G27720	39.83	0	0	39.83	0	0
AT5G57780	39.63	0	9.2	39.63	0	0
AT3G16785	39.43	0	0	0	0	39.43
AT3G16800	39.43	0	39.43	0	0	0
AT2G42010	39.23	0	0	0	39.23	0
AT2G42020	39.23	0	0	0	0	39.23
AT2G42030	39.23	0	0	12.56	0	39.23
AT2G46660	39.23	10.39	0	0	39.23	0
AT2G46970	39.18	0	39.18	6.63	0	0
AT2G46980	39.18	0	0	0	0	39.18
AT1G18720	38.84	0	0	0	0	38.84
AT4G25630	38.84	9.99	0	38.84	0	0
AT4G25631	38.84	38.84	0	0	0	0
AT1G09570	38.44	0	0	38.44	0	0
AT1G09575	38.44	0	0	0	0	38.44
AT2G38530	38.25	0	0	38.25	7.03	0
AT2G38540	38.25	38.25	7.03	0	0	0
AT3G23635	38.25	38.25	7.62	0	0	0
AT3G23637	38.25	0	0	38.25	0	0
AT3G23640	38.25	0	38.25	0	0	0
AT4G22190	38.25	38.25	0	0	6.43	0
AT2G44910	37.85	37.85	0	9.4	8.41	0
AT2G44920	37.85	37.85	7.22	23.57	0	0
AT4G25270	37.85	37.85	0	0	0	19.42
AT4G25280	37.85	0	0	37.85	0	0
AT4G25290	37.85	0	0	0	0	37.85
AT2G18090	37.46	0	0	37.46	0	0
AT1G49500	37.26	0	37.26	11.57	0	0
AT4G25770	37.26	0	0	37.26	0	15.33
AT4G25780	37.26	0	0	37.26	0	0
AT5G47380	37.06	0	0	7.03	0	37.06
AT5G03220	36.86	0	0	0	0	36.86
AT5G03230	36.86	36.86	0	0	0	0
AT4G18660	36.67	0	0	0	0	36.67
AT4G18670	36.67	0	0	0	0	36.67
AT1G80280	36.47	0	36.47	8.41	0	0
AT1G80290	36.47	0	8.41	36.47	0	13.94
AT3G04730	36.07	0	36.07	0	0	7.62
AT3G04732	36.07	0	0	0	36.07	0
AT3G04735	36.07	0	0	0	0	36.07
AT3G04740	36.07	36.07	0	0	0	0
AT4G32272	35.88	0	35.88	11.97	0	7.82
AT4G32280	35.88	35.88	0	0	0	0
AT5G11530	35.68	11.77	0	35.68	0	0
AT5G53660	35.68	0	17.1	35.68	0	0
AT5G53670	35.68	35.68	0	0	0	0
AT2G42440	35.28	0	0	0	0	35.28
AT4G20250	35.28	0	0	0	35.28	0
AT4G20260	35.28	0	35.28	17.5	0	0
AT5G14345	35.28	35.28	0	0	0	0
AT5G14350	35.28	6.83	0	35.28	0	0
AT5G14360	35.28	0	35.28	6.83	0	0
AT1G69570	35.23	0	35.23	0	6.63	6.43
AT1G69540	35.09	0	0	0	0	35.09
AT1G75450	35.03	0	0	35.03	18.69	9.6
AT5G61997	34.89	0	7.22	34.89	0	0
AT5G62000	34.89	0	34.89	7.22	0	0
AT1G02210	34.69	0	0	0	0	34.69
AT1G13260	34.69	6.63	34.69	22.83	9.6	7.22
AT1G21975	34.69	0	0	0	0	34.69
AT1G21980	34.69	0	34.69	11.37	0	0
AT1G73110	34.69	0	34.69	0	0	0
AT1G73120	34.69	0	0	34.69	0	0
AT1G73130	34.69	0	0	34.69	0	0
AT1G79360	34.69	0	34.69	0	0	19.67
AT1G79370	34.69	0	0	34.69	0	0
AT3G07350	34.69	8.61	6.97	0	0	34.69
AT3G54760	34.54	0	34.54	0	0	0
AT3G54770	34.54	0	0	0	34.54	0
AT5G66580	34.49	0	0	18.43	0	34.49
AT5G66590	34.49	0	18.43	34.49	0	0
AT5G66600	34.49	0	0	0	0	34.49
AT2G39480	34.29	0	0	34.29	0	0
AT5G66310	34.29	0	34.29	6.83	0	0
AT2G20830	34.1	0	0	34.1	0	12.9
AT2G20835	34.1	0	0	34.1	0	0
AT2G20840	34.1	0	0	0	0	34.1
AT2G30240	34.1	6.24	0	0	0	34.1
AT1G07200	33.9	33.9	0	0	0	0
AT1G07210	33.9	0	0	33.9	0	0
AT1G15790	33.9	33.9	0	0	0	0
AT1G15800	33.9	0	0	7.03	33.9	0
AT1G15810	33.9	33.9	0	7.03	0	0
AT5G62650	33.9	33.9	0	0	0	0
AT5G62660	33.9	0	33.9	0	0	0
AT5G62670	33.9	0	0	33.9	0	0
AT3G06750	33.7	12.96	0	14.93	0	33.7
AT5G04770	33.7	23.62	0	0	9.6	33.7
AT5G04780	33.7	6.63	33.7	0	0	0
AT1G69690	33.5	33.5	0	0	9.79	0
AT1G72175	33.5	0	0	0	0	33.5
AT1G72180	33.5	33.5	0	0	0	0
AT2G02170	33.5	0	33.5	0	0	0
AT2G02180	33.5	0	33.5	6.63	0	0
AT4G35720	33.5	0	0	33.5	0	0
AT2G01420	33.31	0	0	9.2	33.31	8.41
AT2G38120	33.31	0	0	0	9.2	33.31
AT5G50330	33.31	33.31	0	0	0	0
AT5G50335	33.31	0	33.31	0	0	0
AT5G50340	33.31	0	0	0	0	33.31
AT1G05830	33.11	0	0	0	0	33.11
AT1G05835	33.11	0	0	33.11	0	0
AT1G05840	33.11	9.99	0	0	0	33.11
AT1G32910	32.91	0	0	0	0	32.91
AT1G32920	32.91	0	0	32.91	0	0
AT2G46260	32.91	0	0	0	0	32.91
AT2G46270	32.91	0	7.15	32.91	0	0
AT3G60390	32.91	0	32.91	10.39	0	9
AT3G60640	32.91	0	6.63	0	0	32.91
AT3G60647	32.91	0	32.91	0	0	0
AT3G60650	32.91	32.91	0	0	0	0
AT4G31370	32.91	32.91	0	0	0	0
AT4G31380	32.91	32.91	0	10.98	0	17.02
AT2G41750	32.71	0	0	0	0	32.71
AT2G41760	32.71	0	32.71	0	0	0
AT3G49350	32.71	32.71	0	0	0	0
AT3G49360	32.71	0	0	0	0	32.71
AT4G28720	32.32	0	0	32.32	0	0
AT2G32940	32.12	0	0	0	0	32.12
AT2G35880	32.12	0	0	32.12	0	12.36
AT2G35890	32.12	0	0	0	0	32.12
AT1G21830	31.92	31.92	14.73	10.78	6.43	21.25
AT1G21835	31.92	10.78	14.73	31.92	0	0
AT1G21840	31.92	14.73	31.92	0	0	0
AT1G33240	31.92	10.19	0	31.92	0	17.5
AT2G03110	31.73	0	0	0	0	31.73
AT2G03120	31.73	0	0	31.73	0	0
AT5G08139	31.67	0	31.67	19.28	0	0
AT1G05870	31.53	0	0	31.53	0	0
AT1G05880	31.53	7.22	31.53	0	0	0
AT1G19800	31.53	0	31.53	14.14	0	0
AT2G44070	31.53	31.53	6.24	0	0	0
AT2G44080	31.53	31.53	0	12.36	0	0
AT4G22810	31.53	6.43	0	12.36	0	31.53
AT3G61460	31.33	31.33	9.4	14.14	0	0
AT3G61470	31.33	6.24	31.33	8.61	0	0
AT4G17695	31.33	0	13.15	0	31.33	0
AT5G18000	31.33	31.33	0	0	0	0
AT5G18005	31.33	0	0	31.33	0	0
AT5G18010	31.33	0	0	31.33	0	0
AT2G47760	30.94	0	30.94	0	0	0
AT2G47770	30.94	0	0	0	0	30.94
AT2G47780	30.94	0	0	30.94	0	0
AT3G45600	30.74	0	0	30.74	0	0
AT5G47370	30.74	0	30.74	14.54	0	0
AT1G34110	30.68	0	8.61	0	30.68	0
AT3G12590	30.68	19.67	0	30.68	0	0
AT3G12600	30.68	0	0	30.68	0	19.67
AT5G44260	30.6	0	0	0	0	30.6
AT2G43060	30.54	9.6	30.54	0	0	0
AT1G28670	30.48	0	30.48	7.62	0	9.99
AT1G28680	30.48	0	7.62	0	30.48	0
AT1G28685	30.48	0	0	0	30.48	0
AT2G34185	30.34	0	7.62	0	0	30.34
AT2G34186	30.34	0	0	30.34	0	0
AT2G34190	30.34	0	0	30.34	0	0
AT5G08330	30.34	0	11.18	30.34	0	0
AT5G08335	30.34	9.4	30.34	0	0	0
AT1G51570	30.15	30.15	0	0	0	0
AT1G51580	30.15	0	0	0	30.15	0
AT1G51590	30.15	0	0	0	0	30.15
AT1G75240	30.15	0	30.15	0	0	0
AT2G45950	30.15	0	30.15	17.3	0	0
AT2G45960	30.15	0	30.15	0	12.76	13.35
AT3G47340	30.15	0	30.15	9.2	7.82	0
AT3G47341	30.15	0	0	9.2	0	30.15
AT5G03370	30.15	0	30.15	0	0	0
AT5G20170	30.15	30.15	22.04	0	0	0
AT5G20181	30.15	0	0	0	22.04	30.15
AT5G20190	30.15	0	22.04	30.15	0	0
AT5G25460	30.15	0	30.15	14.14	0	0
AT1G20330	29.95	0	9.79	29.95	0	9.4
AT1G20350	29.95	29.95	0	0	0	0
AT1G24260	29.95	29.95	0	0	0	0
AT1G24265	29.95	0	29.95	0	0	0
AT3G44610	29.75	0	0	0	29.75	0
AT4G30490	29.75	0	0	29.75	0	0
AT4G30500	29.75	0	0	29.75	0	0
AT5G01710	29.75	0	29.75	0	0	0
AT5G01712	29.75	0	29.75	0	0	0
AT5G01720	29.75	0	0	7.82	29.75	0
AT5G20110	29.75	0	0	0	29.75	0
AT1G03600	29.55	0	0	19.48	0	29.55
AT1G03610	29.55	19.48	0	29.55	0	0
AT1G70940	29.55	0	13.15	18.09	29.55	0
AT2G24625	29.55	0	0	0	29.55	0
AT4G37770	29.55	0	0	0	0	29.55
AT5G07920	29.55	0	0	29.55	0	0
AT5G07930	29.55	0	29.55	0	0	0
AT5G15600	29.55	0	0	29.55	0	0
AT5G15610	29.55	29.55	6.24	0	0	0
AT1G07090	29.36	11.18	7.82	29.36	0	0
AT1G07100	29.36	29.36	7.82	11.18	0	6.83
AT1G21590	29.36	0	29.36	0	0	0
AT1G21600	29.36	0	0	0	29.36	0
AT1G21610	29.36	29.36	0	0	0	0
AT4G12730	29.36	0	0	9.2	0	29.36
AT5G60840	29.3	29.3	0	0	0	0
AT3G13740	29.16	0	0	0	0	29.16
AT3G54000	29.16	9.99	29.16	18.09	0	0
AT3G61690	29.16	0	0	0	0	29.16
AT3G61700	29.16	0	0	29.16	0	0
AT3G61826	29.16	0	0	0	29.16	0
AT3G61827	29.16	0	0	0	0	29.16
AT3G61829	29.16	0	0	0	0	29.16
AT3G61830	29.16	0	29.16	0	0	0
AT5G39080	29.16	0	0	29.16	0	0
AT5G39090	29.16	29.16	0	0	0	0
AT5G54580	29.16	0	0	0	0	29.16
AT5G54585	29.16	29.16	0	0	0	0
AT1G23050	28.96	0	11.77	0	0	28.96
AT2G23170	28.96	13.75	0	28.96	0	0
AT2G23171	28.96	13.75	0	0	28.96	0
AT2G45310	28.96	0	0	28.96	0	0
AT2G45315	28.96	0	0	0	0	28.96
AT3G62630	28.96	16.91	0	25.4	0	28.96
AT1G69410	28.76	0	0	0	0	28.76
AT1G69420	28.76	28.76	0	0	0	0
AT4G21560	28.76	28.76	0	0	0	0
AT4G21570	28.76	0	0	0	28.76	0
AT4G21580	28.76	28.76	0	0	0	0
AT5G45380	28.76	0	0	0	28.76	0
AT4G27300	28.61	28.61	7.62	10.98	0	0
AT4G27310	28.61	10.98	0	28.61	0	8.47
AT1G02391	28.56	0	28.56	10.58	0	0
AT1G02400	28.56	10.58	28.56	0	9.79	0
AT4G38860	28.56	7.03	0	28.56	0	0
AT5G56980	28.56	0	28.56	6.43	7.03	0
AT5G03350	28.37	0	0	28.37	0	0
AT5G03360	28.37	0	28.37	13.15	0	0
AT1G77860	28.17	0	28.17	0	0	8.61
AT1G77870	28.17	0	0	0	0	28.17
AT1G77880	28.17	0	0	0	28.17	0
AT2G02070	28.17	0	0	0	0	28.17
AT2G41310	28.17	6.63	28.17	0	0	0
AT3G15540	28.17	0	28.17	9.84	0	10.39
AT1G09260	27.97	0	27.97	0	0	0
AT1G09270	27.97	27.97	0	0	0	0
AT1G64110	27.97	0	0	27.97	0	0
AT1G64120	27.97	0	0	27.97	0	0
AT1G64130	27.97	0	0	27.97	0	0
AT4G34131	27.97	0	0	27.97	0	0
AT4G34135	27.97	0	0	0	0	27.97
AT5G59020	27.97	0	0	7.42	0	27.97
AT1G68660	27.77	27.77	6.24	0	0	0
AT1G68670	27.77	0	6.24	27.77	0	0
AT1G72490	27.77	0	27.77	0	0	0
AT1G75540	27.77	20.66	0	0	6.24	27.77
AT3G20820	27.77	0	0	27.77	0	8.85
AT3G61880	27.77	27.77	0	0	20.86	0
AT4G28730	27.77	8.81	27.77	24.42	0	0
AT1G14920	27.58	26.59	27.58	0	0	7.62
AT2G45590	27.58	0	0	6.25	0	27.58
AT2G45600	27.58	0	0	27.58	9.84	0
AT2G45610	27.58	27.58	9.84	0	0	0
AT3G54070	27.58	0	27.58	0	0	0
AT3G54080	27.58	0	0	27.58	0	0
AT3G54090	27.58	27.58	0	0	0	0
AT4G23820	27.58	0	0	0	27.58	0
AT4G23840	27.58	0	27.58	0	0	0
AT5G12250	27.58	0	27.58	0	0	0
AT5G12260	27.58	0	27.58	0	0	10.98
AT5G46240	27.58	0	27.58	0	0	0
AT4G23713	27.42	0	0	0	27.42	0
AT1G14910	27.38	27.38	0	0	0	10.39
AT3G48050	27.38	0	0	27.38	0	0
AT3G48057	27.38	27.38	0	0	0	0
AT4G38810	27.38	27.38	0	0	0	0
AT4G38820	27.38	0	0	0	0	27.38
AT4G38825	27.38	0	0	27.38	0	0
AT4G38830	27.38	0	0	27.38	0	18.09
AT1G70200	27.18	0	0	27.18	0	0
AT1G72450	27.18	0	6.43	27.18	0	0
AT1G72460	27.18	27.18	0	0	0	0
AT2G33205	27.18	0	27.18	0	0	0
AT2G33210	27.18	0	0	0	27.18	8.21
AT2G47050	27.18	27.18	0	0	0	0
AT2G47060	27.18	0	8.41	27.18	0	0
AT2G47070	27.18	0	27.18	8.41	0	0
AT1G54115	26.98	18.49	0	0	0	26.98
AT1G54120	26.98	26.98	0	7.03	0	0
AT2G16720	26.98	26.98	0	0	0	0
AT2G32430	26.98	26.98	0	0	0	0
AT2G45670	26.98	20.86	7.42	13.94	0	26.98
AT3G16240	26.98	0	0	26.98	0	11.18
AT3G26810	26.98	7.62	0	26.98	0	0
AT4G26530	26.98	0	0	0	0	26.98
AT4G26540	26.98	0	0	0	8.02	26.98
AT2G01570	26.79	0	26.79	0	8.61	0
AT4G30410	26.79	0	16.31	26.79	0	0
AT5G63440	26.79	0	0	0	0	26.79
AT5G63450	26.79	0	0	0	26.79	0
AT1G29290	26.59	0	26.59	0	0	0
AT1G75180	26.59	0	14.93	0	26.59	0
AT1G75190	26.59	26.59	0	18.88	0	14.93
AT1G03800	26.39	0	0	6.43	0	26.39
AT1G03810	26.39	11.77	26.39	6.43	0	0
AT2G34080	26.39	0	0	26.39	0	0
AT2G34090	26.39	0	0	0	0	26.39
AT2G34110	26.39	0	0	8.02	26.39	0
AT2G43330	26.39	0	0	12.96	0	26.39
AT2G43340	26.39	26.39	8.02	16.71	0	0
AT3G05020	26.39	0	0	26.39	0	0
AT3G05030	26.39	0	7.03	0	6.24	26.39
AT4G36530	26.39	0	26.39	0	0	0
AT4G36540	26.39	0	0	26.39	0	0
AT1G01650	26.19	0	26.19	0	0	0
AT1G01660	26.19	0	0	0	0	26.19
AT1G70944	26.19	0	26.19	0	0	15.52
AT1G70950	26.19	26.19	0	9	0	0
AT5G05965	26.19	0	0	26.19	11.37	0
AT5G05970	26.19	26.19	0	0	0	0
AT5G18050	26.19	0	0	26.19	0	0
AT5G18060	26.19	0	0	26.19	0	0
AT1G01390	26	0	0	26	0	0
AT1G01400	26	0	0	0	0	26
AT2G01410	26	8.41	26	0	0	0
AT3G03830	26	26	0	15.52	0	0
AT3G03845	26	0	15.52	0	0	26
AT3G03847	26	0	0	26	0	0
AT3G03850	26	15.52	0	26	0	0
AT3G03852	26	0	26	0	0	0
AT3G13520	26	0	0	7.62	0	26
AT3G13525	26	7.62	26	0	0	0
AT3G18050	26	0	0	0	0	26
AT3G18060	26	0	0	26	0	0
AT3G58840	26	26	0	10.39	0	0
AT3G58850	26	16.12	26	0	0	10.39
AT4G01245	26	15.13	26	0	0	0
AT4G01250	26	26	15.13	0	0	0
AT5G06839	26	0	0	0	26	0
AT5G13990	26	0	6.63	26	0	0
AT5G14000	26	0	0	26	0	7.42
AT5G18070	26	0	0	0	0	26
AT5G18080	26	0	0	26	0	0
AT5G18085	26	0	0	26	0	0
AT5G18090	26	0	26	0	0	0
AT5G47820	26	0	26	0	0	0
AT4G36770	25.8	8.61	0	25.8	0	0
AT4G36780	25.8	0	8.41	8.61	0	25.8
AT4G21910	25.6	0	0	0	25.6	0
AT5G02190	25.6	0	0	16.91	17.3	25.6
AT5G02200	25.6	0	17.3	25.6	0	0
AT2G21050	25.4	0	0	0	25.4	0
AT2G22810	25.4	25.4	0	0	0	0
AT2G22820	25.4	0	0	25.4	0	0
AT2G22821	25.4	0	0	0	0	25.4
AT3G18710	25.4	0	0	25.4	0	0
AT3G62640	25.4	7.42	0	16.91	0	25.4
AT3G62650	25.4	0	25.4	16.91	0	7.42
AT4G30360	25.4	0	25.4	0	0	0
AT4G30370	25.4	0	0	25.4	0	0
AT4G30380	25.4	0	0	25.4	0	0
AT5G18640	25.4	0	0	0	0	25.4
AT5G18650	25.4	0	25.4	11.37	9.2	0
AT1G24160	25.21	25.21	0	0	0	0
AT1G24170	25.21	0	0	25.21	0	0
AT1G32530	25.21	0	25.21	6.83	0	0
AT2G34020	25.21	0	25.21	10.39	0	0
AT2G34030	25.21	0	0	0	0	25.21
AT5G58430	25.21	0	0	25.21	0	0
AT5G58440	25.21	0	0	0	12.16	25.21
AT5G60760	25.21	0	25.21	0	0	0
AT1G03860	25.01	25.01	13.75	0	6.83	7.82
AT1G03870	25.01	0	0	25.01	13.75	6.83
AT1G03880	25.01	13.75	25.01	0	0	0
AT2G05786	25.01	25.01	0	0	21.25	0
AT2G05790	25.01	0	0	21.25	25.01	0
AT3G62690	25.01	0	0	0	16.12	25.01
AT4G26690	25.01	0	25.01	0	0	0
AT4G26700	25.01	25.01	0	0	0	0
AT2G39855	24.81	0	0	0	0	24.81
AT2G39860	24.81	14.34	0	24.81	0	0
AT2G41820	24.81	12.56	24.81	0	0	0
AT2G42800	24.81	0	0	24.81	0	0
AT3G15770	24.81	0	0	24.81	0	0
AT3G15780	24.81	0	24.81	0	0	0
AT4G19390	24.81	0	24.81	0	0	0
AT4G19395	24.81	0	0	24.81	0	0
AT4G39400	24.81	0	24.81	11.77	8.02	11.37
AT5G41905	24.81	0	0	24.81	0	0
AT5G41908	24.81	0	0	24.81	0	0
AT1G19310	24.61	0	0	24.61	0	6.43
AT1G19320	24.61	0	24.61	0	0	0
AT1G21400	24.61	0	0	7.42	24.61	0
AT1G21410	24.61	24.61	0	8.21	0	0
AT1G28450	24.61	24.61	0	0	0	0
AT1G30330	24.61	12.31	11.18	0	0	24.61
AT1G69252	24.61	0	0	0	0	24.61
AT1G69260	24.61	0	20.07	24.61	0	0
AT1G74440	24.61	0	24.61	0	0	0
AT1G74448	24.61	0	0	24.61	0	0
AT1G74450	24.61	0	0	24.61	0	0
AT2G18300	24.61	0	0	24.61	0	10.19
AT2G18310	24.61	0	0	0	0	24.61
AT2G18320	24.61	0	24.61	0	0	0
AT4G24060	24.61	24.61	0	0	0	0
AT4G28740	24.42	24.42	0	0	0	0
AT4G36370	24.42	0	9.6	0	24.42	6.83
AT4G36380	24.42	0	0	0	13.94	24.42
AT5G03140	24.42	24.42	6.63	0	12.76	0
AT2G18780	24.34	0	24.34	0	0	0
AT2G18790	24.34	0	0	24.34	0	0
AT1G29980	24.22	0	0	0	24.22	0
AT1G29990	24.22	24.22	0	0	0	0
AT1G68825	24.22	0	0	0	24.22	0
AT2G41060	24.22	0	0	0	0	24.22
AT2G41070	24.22	0	0	24.22	0	0
AT2G41080	24.22	24.22	0	0	0	0
AT3G23930	24.22	0	0	24.22	0	0
AT3G23940	24.22	24.22	0	0	0	0
AT4G13530	24.22	0	0	0	0	24.22
AT4G13540	24.22	0	0	24.22	0	0
AT4G18810	24.22	24.22	0	8.61	0	10.58
AT4G18815	24.22	24.22	0	8.61	0	0
AT4G18820	24.22	0	24.22	0	0	0
AT1G47870	24.02	24.02	0	0	0	0
AT1G49200	24.02	0	0	24.02	0	0
AT1G60190	24.02	0	0	24.02	7.42	0
AT2G41930	24.02	0	0	0	0	24.02
AT1G23380	23.82	23.82	0	0	13.55	0
AT1G67265	23.82	23.82	0	15.92	0	17.64
AT1G69740	23.82	0	0	0	0	23.82
AT1G69750	23.82	0	0	23.82	0	0
AT1G74830	23.82	23.82	0	7.22	0	0
AT1G74840	23.82	0	0	23.82	0	7.22
AT2G27050	23.82	0	0	0	8.21	23.82
AT2G27060	23.82	23.82	0	0	0	0
AT3G25020	23.82	0	23.82	0	0	0
AT3G25030	23.82	0	0	23.82	0	0
AT3G25040	23.82	23.82	0	0	0	0
AT3G44310	23.82	0	14.93	23.82	0	0
AT3G54190	23.82	0	0	23.82	0	0
AT3G54200	23.82	0	0	23.82	0	0
AT4G34230	23.82	0	0	23.82	0	8.65
AT4G34240	23.82	0	0	23.82	0	0
AT3G48260	23.62	0	0	23.62	0	0
AT3G48270	23.62	0	23.62	0	0	0
AT4G32010	23.62	0	0	0	0	23.62
AT4G32020	23.62	0	23.62	0	0	9.79
AT5G04530	23.62	7.62	0	23.62	0	0
AT5G04760	23.62	23.62	0	0	0	0
AT5G53970	23.62	0	0	0	0	23.62
AT5G53980	23.62	0	0	23.62	0	0
AT5G60200	23.62	0	0	23.62	0	0
AT3G47620	23.43	0	0	23.43	0	0
AT4G17810	23.43	23.43	0	0	0	0
AT4G35500	23.43	0	0	0	0	23.43
AT4G35510	23.43	0	0	0	0	23.43
AT4G39200	23.43	0	0	0	0	23.43
AT4G39210	23.43	0	0	23.43	0	0
AT5G15254	23.43	23.43	0	0	0	0
AT5G15260	23.43	0	23.43	0	0	0
AT5G15265	23.43	0	0	23.43	0	0
AT5G15270	23.43	23.43	0	0	0	0
AT2G26110	23.23	0	0	0	0	23.23
AT2G26120	23.23	0	23.23	0	0	0
AT3G47820	23.23	0	0	0	0	23.23
AT3G47830	23.23	0	0	23.23	0	0
AT3G47833	23.23	23.23	0	0	0	0
AT4G22730	23.23	0	0	23.23	0	0
AT4G30060	23.23	23.23	0	0	0	0
AT4G30064	23.23	0	0	0	23.23	0
AT4G30067	23.23	0	23.23	0	10.58	0
AT4G30070	23.23	23.23	10.58	0	0	0
AT1G11420	23.03	23.03	0	0	0	0
AT1G11430	23.03	0	0	0	0	23.03
AT1G11440	23.03	0	0	23.03	0	0
AT1G14720	23.03	23.03	0	0	0	0
AT1G14730	23.03	23.03	0	0	0	0
AT1G56220	23.03	0	0	23.03	0	6.24
AT1G61350	23.03	0	0	0	0	23.03
AT1G61353	23.03	0	0	0	0	23.03
AT3G62660	23.03	0	0	0	0	23.03
AT3G62670	23.03	0	0	0	0	23.03
AT4G22000	23.03	0	23.03	0	0	0
AT4G22010	23.03	0	0	23.03	8.21	0
AT5G05430	23.03	0	23.03	0	0	0
AT5G05435	23.03	0	0	0	0	23.03
AT5G05440	23.03	0	0	23.03	0	0
AT5G19140	23.03	0	0	23.03	0	0
AT5G19150	23.03	0	7.82	0	0	23.03
AT1G02630	22.83	0	0	22.83	0	14.14
AT1G02640	22.83	0	22.83	0	12.56	0
AT1G02660	22.83	0	0	22.83	0	0
AT1G02670	22.83	0	0	22.83	0	7.82
AT2G46580	22.83	6.24	22.83	11.77	0	0
AT2G46590	22.83	0	11.77	22.83	6.24	8.06
AT3G50890	22.83	0	0	22.83	0	0
AT3G50895	22.83	8.61	22.83	0	0	0
AT3G50900	22.83	8.61	22.83	0	0	9.99
AT4G09890	22.83	0	9	22.83	0	0
AT3G08020	22.68	13.15	22.68	0	0	0
AT3G08030	22.68	0	22.68	13.15	0	0
AT1G04240	22.64	7.62	0	22.64	6.35	0
AT1G67480	22.64	0	0	22.64	0	0
AT1G70710	22.64	0	0	6.58	22.64	0
AT1G77200	22.64	0	22.64	0	6.63	0
AT3G15534	22.64	0	0	22.64	0	0
AT3G15536	22.64	22.64	0	0	0	0
AT3G54500	22.64	0	22.64	14.54	0	0
AT3G54510	22.64	0	14.54	22.64	0	0
AT3G58720	22.64	22.64	0	7.82	0	0
AT3G58730	22.64	0	0	22.64	0	7.82
AT3G58740	22.64	0	0	0	0	22.64
AT5G13140	22.64	0	0	22.64	0	0
AT5G13150	22.64	0	0	0	0	22.64
AT5G65890	22.64	0	0	0	22.64	0
AT5G65900	22.64	0	22.64	0	0	0
AT1G19870	22.44	0	0	22.44	0	0
AT1G19880	22.44	0	0	0	0	22.44
AT2G18010	22.44	22.44	8.41	0	0	0
AT2G46220	22.44	0	0	0	0	22.44
AT2G46225	22.44	0	0	22.44	0	0
AT3G11490	22.44	0	22.44	0	0	0
AT3G11500	22.44	0	0	0	0	22.44
AT5G44460	22.44	0	0	22.44	0	0
AT5G44470	22.44	0	22.44	0	0	0
AT1G10560	22.24	10.58	0	22.24	0	0
AT1G49780	22.24	22.24	0	0	0	0
AT1G79530	22.24	0	0	22.24	0	0
AT1G79540	22.24	0	0	0	0	22.24
AT2G42620	22.24	0	22.24	0	0	0
AT3G47000	22.24	22.24	0	0	0	0
AT3G47010	22.24	0	0	22.24	0	0
AT3G47020	22.24	0	0	22.24	0	0
AT3G47030	22.24	22.24	0	0	0	0
AT4G01328	22.24	22.24	0	12.56	0	8.81
AT4G01330	22.24	0	0	12.56	0	22.24
AT4G01335	22.24	0	0	22.24	0	0
AT4G01340	22.24	0	22.24	0	0	0
AT4G29090	22.24	22.24	0	6.43	0	0
AT4G38420	22.24	13.35	0	0	0	22.24
AT4G38430	22.24	0	0	22.24	0	0
AT4G38440	22.24	22.24	0	0	0	0
AT1G16840	22.04	0	22.04	0	0	0
AT1G16850	22.04	0	0	22.04	0	0
AT1G16858	22.04	0	22.04	0	0	0
AT1G16860	22.04	0	22.04	0	0	0
AT2G16440	22.04	0	0	0	0	22.04
AT2G42890	22.04	0	0	0	0	22.04
AT2G42900	22.04	0	0	0	22.04	0
AT2G42910	22.04	0	0	22.04	0	0
AT3G28340	22.04	0	0	22.04	0	0
AT3G54960	22.04	0	0	22.04	0	0
AT3G58860	22.04	0	0	0	0	22.04
AT5G20180	22.04	0	0	0	0	22.04
AT3G57550	21.99	0	12.56	0	0	21.99
AT3G57560	21.99	0	0	0	0	21.99
AT3G57570	21.99	21.99	0	0	0	0
AT1G28560	21.85	21.85	0	0	0	0
AT1G28570	21.85	14.93	0	21.85	0	0
AT1G28580	21.85	0	0	14.93	0	21.85
AT1G72610	21.85	0	0	21.85	0	12.76
AT1G72620	21.85	12.76	0	21.85	0	0
AT2G40970	21.85	0	14.14	21.85	0	0
AT2G40980	21.85	21.85	0	0	0	0
AT2G45050	21.85	21.85	0	7.22	0	0
AT3G11700	21.85	0	0	21.85	0	6.63
AT3G12620	21.85	0	21.85	0	0	0
AT3G12630	21.85	0	0	21.85	0	0
AT3G12640	21.85	0	21.85	0	0	0
AT3G12820	21.85	0	0	21.85	0	0
AT3G18010	21.85	0	21.85	0	0	0
AT3G18020	21.85	0	21.85	0	0	0
AT3G24518	21.85	0	0	21.85	0	0
AT3G24520	21.85	0	0	0	0	21.85
AT3G62700	21.85	0	21.85	0	0	0
AT3G62710	21.85	0	0	0	0	21.85
AT4G24760	21.85	0	0	21.85	0	0
AT1G15670	21.65	11.97	21.65	0	7.42	0
AT1G20620	21.65	0	21.65	9.99	10.19	7.82
AT1G49730	21.65	0	0	21.65	0	0
AT1G49740	21.65	0	21.65	0	0	0
AT2G01450	21.65	0	0	0	21.65	0
AT2G03690	21.65	0	21.65	0	0	0
AT2G03700	21.65	0	0	21.65	0	0
AT2G33310	21.65	0	0	0	21.65	0
AT3G29230	21.65	0	0	0	0	21.65
AT3G29240	21.65	0	0	0	21.65	0
AT5G19190	21.65	0	0	17.1	0	21.65
AT5G19200	21.65	0	17.1	21.65	0	0
AT5G46320	21.65	21.65	0	0	0	0
AT5G46330	21.65	0	0	21.65	0	0
AT5G54950	21.65	21.65	0	0	0	11.97
AT5G54960	21.65	0	0	21.65	0	0
AT5G54970	21.65	0	0	21.65	0	0
AT5G54980	21.65	21.65	0	0	0	0
AT5G67300	21.65	9.6	10.58	21.65	0	0
AT1G01250	21.45	21.45	0	0	0	0
AT1G01260	21.45	0	21.45	0	0	0
AT1G07570	21.45	21.45	0	7.42	0	0
AT1G07580	21.45	0	7.42	0	0	21.45
AT1G07590	21.45	0	0	0	0	21.45
AT2G20562	21.45	21.45	0	0	0	0
AT2G20570	21.45	21.45	0	0	0	11.18
AT2G37630	21.45	11.97	21.45	0	0	0
AT2G42880	21.45	0	0	0	6.63	21.45
AT3G19970	21.45	0	0	21.45	0	7.03
AT1G21810	21.25	21.25	0	0	0	0
AT1G32710	21.25	0	21.25	6.24	0	0
AT2G42365	21.25	0	0	21.25	0	0
AT2G42370	21.25	0	0	0	0	21.25
AT2G42380	21.25	0	0	14.54	0	21.25
AT2G44650	21.25	21.25	0	0	0	0
AT2G44660	21.25	0	0	21.25	0	0
AT2G44670	21.25	0	21.25	0	0	0
AT3G54910	21.25	21.25	0	6.43	0	0
AT3G54920	21.25	0	0	6.43	21.25	0
AT3G57870	21.25	0	0	21.25	0	0
AT3G57880	21.25	0	0	8.02	0	21.25
AT4G14750	21.25	21.25	0	7.03	0	14.73
AT4G25380	21.25	0	0	21.25	0	0
AT4G25386	21.25	0	0	0	21.25	0
AT4G25390	21.25	0	0	21.25	0	0
AT5G41400	21.25	0	21.25	0	0	0
AT5G41401	21.25	0	0	0	21.25	0
AT5G52570	21.25	0	0	21.25	0	0
AT5G52580	21.25	0	0	21.25	0	0
AT5G58640	21.25	0	0	0	0	21.25
AT5G58650	21.25	0	0	21.25	0	0
AT5G58660	21.25	0	0	21.25	0	0
AT1G08200	21.06	0	0	21.06	0	6.83
AT1G08210	21.06	0	0	0	0	21.06
AT1G10140	21.06	0	21.06	0	0	0
AT1G10150	21.06	0	0	21.06	0	0
AT1G18070	21.06	0	21.06	0	0	0
AT1G18075	21.06	0	21.06	0	0	0
AT1G18080	21.06	21.06	0	0	0	0
AT1G20980	21.06	0	21.06	0	0	0
AT1G22900	21.06	21.06	0	0	0	0
AT1G22910	21.06	0	0	0	21.06	0
AT2G46780	21.06	0	21.06	9.6	0	13.35
AT3G59890	21.06	12.36	21.06	0	0	0
AT3G59900	21.06	0	21.06	12.36	0	0
AT4G15230	21.06	0	6.24	0	0	21.06
AT4G15233	21.06	0	0	21.06	0	14.93
AT4G16515	21.06	0	0	21.06	0	0
AT4G16520	21.06	0	0	0	0	21.06
AT4G20170	21.06	0	0	0	0	21.06
AT4G24080	21.06	0	0	0	21.06	0
AT4G24090	21.06	0	0	21.06	0	0
AT4G24100	21.06	21.06	0	0	0	7.03
AT4G36120	21.06	0	0	0	0	21.06
AT5G07571	21.06	21.06	0	0	0	0
AT5G07580	21.06	0	0	0	21.06	0
AT5G66880	21.06	0	0	21.06	0	0
AT3G23040	20.9	0	15.92	0	10.98	20.9
AT1G49130	20.86	0	0	20.86	0	0
AT1G49140	20.86	0	0	0	0	20.86
AT1G49150	20.86	20.86	0	0	0	0
AT2G31005	20.86	0	0	0	0	20.86
AT2G31010	20.86	0	0	20.86	0	0
AT2G45680	20.86	0	0	11.37	20.86	7.42
AT2G45685	20.86	0	13.94	20.86	0	11.37
AT3G10985	20.86	0	0	0	20.86	0
AT3G10986	20.86	0	0	0	0	20.86
AT4G01400	20.86	6.43	0	20.86	0	0
AT4G01410	20.86	0	0	20.86	0	6.43
AT4G26940	20.86	0	0	20.86	0	0
AT4G26950	20.86	0	0	0	0	20.86
AT4G39840	20.86	0	8.02	0	0	20.86
AT4G39850	20.86	0	20.86	0	0	0
AT5G58070	20.86	0	0	20.86	0	0
AT5G58080	20.86	0	0	0	0	20.86
AT1G01470	20.66	0	0	20.66	0	0
AT1G01471	20.66	0	0	0	20.66	0
AT1G01480	20.66	20.66	0	0	0	0
AT1G76090	20.66	0	20.66	0	0	0
AT1G76100	20.66	0	0	0	0	20.66
AT1G78260	20.66	7.03	0	0	20.66	0
AT1G78265	20.66	0	20.66	0	0	7.42
AT1G78270	20.66	0	0	7.42	0	20.66
AT1G78280	20.66	20.66	0	0	7.42	0
AT2G28500	20.66	0	0	0	0	20.66
AT3G10720	20.66	0	0	8.02	20.66	0
AT3G53370	20.66	20.66	0	0	0	0
AT3G53380	20.66	0	0	20.66	0	0
AT3G53390	20.66	0	0	20.66	0	0
AT4G00150	20.66	0	0	6.24	0	20.66
AT4G10010	20.66	0	20.66	0	0	0
AT4G10020	20.66	0	0	20.66	0	0
AT5G42690	20.66	0	20.66	0	0	0
AT5G42700	20.66	0	0	20.66	0	0
AT5G67411	20.66	20.66	0	0	0	6.43
AT1G12420	20.46	0	13.94	20.46	0	0
AT1G29490	20.46	0	0	0	0	20.46
AT1G29500	20.46	0	0	20.46	0	0
AT1G29510	20.46	0	20.46	0	0	0
AT1G29520	20.46	20.46	0	0	0	0
AT1G78220	20.46	20.46	0	0	0	0
AT1G78230	20.46	0	0	20.46	0	0
AT1G79420	20.46	0	0	0	20.46	0
AT2G14900	20.46	0	0	20.46	0	8.41
AT2G28140	20.46	0	0	20.46	0	0
AT2G40270	20.46	0	0	20.46	0	12.16
AT2G40280	20.46	0	0	0	0	20.46
AT3G47940	20.46	0	20.46	0	0	0
AT3G47950	20.46	0	20.46	0	0	0
AT4G25500	20.46	0	0	20.46	0	0
AT5G04050	20.46	0	0	0	0	20.46
AT5G04060	20.46	0	0	20.46	0	0
AT1G22330	20.41	0	11.77	0	20.41	6.24
AT1G68185	20.32	0	0	0	0	20.32
AT1G68190	20.32	0	0	20.32	0	0
AT1G33170	20.27	0	0	20.27	0	0
AT1G66940	20.27	0	0	20.27	0	0
AT1G67910	20.27	0	0	20.27	0	0
AT1G67920	20.27	0	20.27	0	0	0
AT1G74670	20.27	0	0	20.27	10.19	0
AT2G10940	20.27	0	0	20.27	0	0
AT3G23050	20.27	0	0	16.31	20.27	11.97
AT3G50750	20.27	0	0	20.27	15.52	0
AT3G50751	20.27	0	15.52	0	0	20.27
AT5G05690	20.27	0	20.27	0	0	0
AT5G41130	20.27	0	20.27	0	0	0
AT5G61990	20.27	0	0	20.27	0	0
AT5G64860	20.27	0	0	20.27	0	0
AT5G64870	20.27	0	0	0	0	20.27
AT5G64880	20.27	20.27	0	0	0	0
AT1G51130	20.07	0	0	20.07	0	0
AT1G51140	20.07	0	0	0	0	20.07
AT1G80490	20.07	0	0	20.07	0	0
AT2G25490	20.07	0	20.07	0	0	8.02
AT2G35200	20.07	0	0	0	0	20.07
AT2G35208	20.07	0	0	20.07	0	0
AT2G35210	20.07	0	0	20.07	0	0
AT3G53990	20.07	9.99	20.07	0	8.02	0
AT3G54802	20.07	0	20.07	0	0	0
AT3G54804	20.07	14.54	0	20.07	0	0
AT3G54810	20.07	20.07	0	14.54	0	0
AT4G38470	20.07	0	20.07	10.58	0	6.24
AT5G03150	20.07	0	0	0	20.07	0
AT5G03160	20.07	0	20.07	0	0	0
AT5G19095	20.07	12.36	20.07	0	0	0
AT5G64260	20.07	15.72	20.07	12.56	7.03	0
AT1G31920	19.87	0	0	19.87	0	0
AT1G31930	19.87	0	19.87	6.24	0	0
AT1G74740	19.87	0	19.87	0	0	0
AT1G74750	19.87	19.87	0	0	0	0
AT1G75500	19.87	0	19.87	0	0	9.79
AT1G79120	19.87	0	0	0	19.87	9.2
AT2G45440	19.87	0	0	0	0	19.87
AT2G45450	19.87	0	9.2	0	0	19.87
AT3G13970	19.87	0	19.87	9	0	11.37
AT4G05100	19.87	0	0	9	0	19.87
AT5G02590	19.87	0	19.87	0	0	0
AT5G15220	19.87	0	8.02	19.87	0	0
AT5G15230	19.87	0	19.87	0	0	6.83
AT5G47410	19.87	0	0	0	0	19.87
AT5G47420	19.87	0	0	19.87	0	0
AT5G60850	19.87	0	10.43	19.87	0	12.75
AT5G66100	19.87	0	16.12	0	0	19.87
AT5G66110	19.87	0	0	19.87	0	0
AT1G22767	19.67	0	0	8.41	6.24	19.67
AT1G22770	19.67	0	19.67	8.41	0	0
AT1G78070	19.67	0	0	7.03	0	19.67
AT1G79350	19.67	0	0	19.67	0	0
AT2G10606	19.67	19.67	0	6.63	0	0
AT2G10608	19.67	0	0	0	0	19.67
AT2G13650	19.67	0	19.67	0	0	0
AT2G13660	19.67	0	0	0	0	19.67
AT2G13665	19.67	0	0	19.67	0	0
AT2G47000	19.67	6.63	19.67	0	0	0
AT2G47010	19.67	0	9.4	19.67	0	7.42
AT3G12610	19.67	0	0	13.94	0	19.67
AT3G15200	19.67	6.24	0	19.67	0	0
AT3G15210	19.67	0	19.67	0	6.24	9.4
AT4G39800	19.67	0	0	19.67	0	0
AT1G01370	19.48	0	0	0	0	19.48
AT1G01380	19.48	0	0	19.48	0	0
AT1G03590	19.48	19.48	0	0	0	0
AT1G64370	19.48	0	0	0	0	19.48
AT1G64380	19.48	0	0	0	0	19.48
AT1G76878	19.48	0	7.22	19.48	0	0
AT1G76880	19.48	0	0	0	0	19.48
AT2G21660	19.48	0	0	19.48	0	0
AT2G21670	19.48	0	0	0	0	19.48
AT2G21680	19.48	0	19.48	0	0	0
AT2G27490	19.48	19.48	0	9.99	0	0
AT2G27500	19.48	0	0	8.21	19.48	0
AT3G15570	19.48	0	19.48	0	0	0
AT3G15578	19.48	0	0	19.48	0	0
AT3G15580	19.48	0	0	0	0	19.48
AT3G15585	19.48	19.48	0	0	0	0
AT4G28290	19.48	0	8.61	19.48	0	0
AT4G28300	19.48	0	19.48	0	0	0
AT5G07990	19.48	19.48	0	0	0	0
AT5G49100	19.48	0	0	9	19.48	15.13
AT5G49110	19.48	0	19.48	9	0	0
AT5G59530	19.48	19.48	0	0	0	0
AT5G59540	19.48	10.58	0	19.48	0	0
AT5G59550	19.48	0	0	10.58	0	19.48
AT4G25260	19.42	0	0	19.42	0	0
AT5G06970	19.32	0	0	19.32	0	0
AT5G06980	19.32	0	0	19.32	0	0
AT5G06990	19.32	19.32	0	0	0	0
AT1G01490	19.28	6.83	19.28	10.19	0	0
AT1G01500	19.28	10.19	19.28	6.83	0	0
AT1G07880	19.28	0	19.28	0	0	0
AT1G07885	19.28	0	0	19.28	0	0
AT1G07890	19.28	0	0	19.28	0	0
AT1G12110	19.28	0	8.21	0	19.28	0
AT2G26690	19.28	0	0	0	19.28	0
AT2G26692	19.28	0	0	19.28	0	0
AT2G33233	19.28	0	19.28	0	0	0
AT3G02493	19.28	0	19.28	0	0	0
AT3G02500	19.28	0	19.28	0	0	0
AT3G19170	19.28	0	0	19.28	0	0
AT3G19180	19.28	0	0	19.28	0	0
AT4G00820	19.28	0	14.73	6.63	0	19.28
AT4G00830	19.28	6.63	0	19.28	0	0
AT4G29330	19.28	0	0	19.28	0	0
AT5G18590	19.28	19.28	0	0	13.75	0
AT5G18600	19.28	0	19.28	0	0	13.75
AT5G22740	19.28	0	0	0	19.28	0
AT5G47540	19.28	0	19.28	10.58	0	0
AT5G47550	19.28	0	0	19.28	0	10.58
AT5G47560	19.28	0	0	0	19.28	0
AT1G64628	19.12	0	0	0	0	19.12
AT1G64630	19.12	0	0	0	0	19.12
AT1G64640	19.12	0	0	19.12	0	0
AT1G64650	19.12	16.51	0	0	0	19.12
AT1G60430	19.08	0	0	19.08	0	0
AT1G60440	19.08	9.79	0	7.62	0	19.08
AT2G46685	19.08	0	0	19.08	0	0
AT3G50730	19.08	19.08	0	0	0	0
AT3G50740	19.08	8.81	0	0	19.08	0
AT4G30430	19.08	0	19.08	0	0	0
AT4G30440	19.08	0	8.61	0	0	19.08
AT5G07000	19.08	19.08	0	0	11.37	0
AT1G33760	18.88	0	0	0	0	18.88
AT1G33770	18.88	18.88	0	0	0	0
AT1G50450	18.88	0	0	18.88	0	0
AT1G50460	18.88	18.88	0	0	0	0
AT1G68130	18.88	0	18.88	12.76	0	0
AT1G77690	18.88	0	0	13.35	18.88	0
AT2G21195	18.88	0	0	0	0	18.88
AT2G21200	18.88	0	14.93	18.88	0	0
AT2G21210	18.88	0	0	14.93	0	18.88
AT2G35470	18.88	0	0	0	0	18.88
AT2G35480	18.88	8.41	18.88	0	0	0
AT2G35950	18.88	0	0	18.88	0	0
AT2G35960	18.88	18.88	0	0	0	0
AT2G36910	18.88	0	0	0	18.88	0
AT3G19680	18.88	0	11.97	0	18.88	10.19
AT3G19690	18.88	0	0	0	10.19	18.88
AT3G19700	18.88	0	18.88	0	0	0
AT3G43430	18.88	0	18.88	0	0	0
AT3G43431	18.88	0	18.88	0	0	0
AT5G65920	18.88	0	18.88	8.61	0	0
AT5G65925	18.88	14.14	18.88	0	0	0
AT4G08949	18.73	18.09	0	16.71	0	18.73
AT4G08950	18.73	0	18.73	16.71	0	18.09
AT5G13090	18.73	0	18.73	0	0	6.83
AT5G13100	18.73	0	0	18.73	0	10.58
AT5G13110	18.73	18.73	0	10.58	0	0
AT1G18330	18.69	0	0	18.69	0	0
AT1G18335	18.69	0	0	0	0	18.69
AT1G18570	18.69	0	0	0	18.69	0
AT1G18735	18.69	0	18.69	0	0	0
AT1G18740	18.69	0	0	18.69	0	0
AT1G25230	18.69	0	0	18.69	6.63	6.63
AT1G25240	18.69	18.69	0	0	0	11.77
AT1G25560	18.69	7.62	16.71	18.69	11.57	0
AT1G28480	18.69	0	0	18.69	0	0
AT1G28490	18.69	0	18.69	0	0	0
AT1G29390	18.69	0	18.69	0	0	0
AT1G29395	18.69	0	0	18.69	0	0
AT1G29400	18.69	0	0	0	0	18.69
AT1G64670	18.69	0	0	18.69	0	14.34
AT1G64680	18.69	11.37	18.69	0	0	0
AT1G75440	18.69	0	0	0	9.6	18.69
AT2G18350	18.69	0	0	18.69	0	0
AT2G28840	18.69	18.69	0	0	0	12.96
AT3G02170	18.69	7.82	18.69	9.79	0	0
AT3G06060	18.69	8.21	18.69	17.3	0	0
AT3G06070	18.69	6.83	7.82	18.69	0	17.3
AT3G16620	18.69	0	0	18.69	0	0
AT3G16630	18.69	0	9.6	0	0	18.69
AT3G27960	18.69	0	18.69	0	0	0
AT3G51360	18.69	18.69	0	0	0	0
AT3G51370	18.69	0	0	18.69	0	0
AT4G26210	18.69	18.69	0	0	0	0
AT5G40470	18.69	0	0	0	0	18.69
AT1G32200	18.49	0	0	0	0	18.49
AT1G52890	18.49	0	0	18.49	0	0
AT1G54100	18.49	0	0	18.49	0	0
AT1G54110	18.49	0	0	18.49	0	0
AT1G70370	18.49	0	0	0	18.49	0
AT2G34930	18.49	0	0	18.49	0	0
AT2G34940	18.49	0	0	18.49	0	0
AT3G17580	18.49	0	0	18.49	0	0
AT4G16490	18.49	0	0	18.49	0	9.6
AT5G47635	18.49	0	18.49	0	0	0
AT5G47640	18.49	0	0	18.49	0	0
AT5G48900	18.49	10.78	0	0	6.83	18.49
AT5G48905	18.49	0	18.49	0	0	0
AT5G50880	18.49	18.49	0	0	0	0
AT5G50890	18.49	0	0	0	0	18.49
AT5G50900	18.49	0	0	0	8.41	18.49
AT1G06840	18.29	0	18.29	0	0	0
AT1G06850	18.29	0	0	18.29	0	0
AT1G08910	18.29	0	0	0	0	18.29
AT1G23710	18.29	0	0	18.29	0	0
AT1G62380	18.29	0	0	18.29	0	0
AT1G75490	18.29	0	0	18.29	0	9.79
AT2G16850	18.29	0	0	18.29	0	6.24
AT2G40600	18.29	18.29	0	0	0	0
AT2G40610	18.29	0	17.1	18.29	0	0
AT2G44740	18.29	7.82	14.34	18.29	0	9.99
AT3G14370	18.29	0	18.29	0	0	0
AT5G15150	18.29	6.43	18.29	0	0	6.83
AT5G47060	18.29	0	18.29	0	0	0
AT5G55910	18.29	18.29	0	0	7.22	0
AT5G55920	18.29	0	0	0	0	18.29
AT1G11545	18.09	0	0	18.09	0	0
AT1G11550	18.09	0	0	18.09	0	0
AT1G11560	18.09	0	18.09	0	0	0
AT1G11570	18.09	18.09	0	0	0	0
AT1G12820	18.09	0	0	18.09	0	0
AT1G68550	18.09	14.54	0	0	0	18.09
AT1G68552	18.09	14.54	0	0	0	18.09
AT2G20670	18.09	0	0	18.09	6.43	7.03
AT3G02540	18.09	0	8.21	18.09	0	0
AT3G02550	18.09	0	0	8.21	0	18.09
AT3G13700	18.09	18.09	0	0	0	8.02
AT3G13710	18.09	18.09	0	0	0	8.02
AT3G13720	18.09	0	0	18.09	0	0
AT3G13724	18.09	0	0	0	0	18.09
AT3G20250	18.09	0	0	18.09	0	0
AT3G20260	18.09	0	0	6.63	0	18.09
AT4G23432	18.09	18.09	0	0	10.19	0
AT4G23440	18.09	0	18.09	0	0	0
AT4G30180	18.09	12.56	0	18.09	0	0
AT4G38840	18.09	7.03	0	18.09	0	0
AT4G38850	18.09	0	0	18.09	0	0
AT5G02020	18.09	0	0	18.09	0	0
AT5G02021	18.09	0	0	18.09	0	0
AT5G06700	18.09	0	0	6.24	0	18.09
AT5G22090	18.09	0	12.96	18.09	0	0
AT5G58595	18.09	18.09	0	0	0	0
AT5G58600	18.09	0	0	18.09	0	0
AT5G58610	18.09	7.82	0	13.75	0	18.09
AT5G61960	18.09	18.09	0	7.42	0	0
AT5G61970	18.09	0	18.09	0	0	0
AT2G18969	17.94	0	0	17.94	0	0
AT2G18970	17.94	0	0	0	0	17.94
AT4G34760	17.94	0	0	17.94	0	7.03
AT4G16500	17.91	8.41	0	17.91	0	6.24
AT4G16510	17.91	0	6.24	17.91	8.41	0
AT1G23480	17.89	0	0	0	0	17.89
AT1G23490	17.89	0	0	17.89	0	0
AT1G49210	17.89	0	0	17.89	0	0
AT1G62480	17.89	17.89	0	0	0	0
AT1G72580	17.89	17.89	0	0	0	0
AT1G72590	17.89	0	0	0	0	17.89
AT1G72600	17.89	0	0	17.89	0	12.76
AT2G38170	17.89	17.89	0	0	0	0
AT2G38180	17.89	0	17.89	0	0	0
AT2G39710	17.89	0	0	0	0	17.89
AT2G41870	17.89	0	0	17.89	0	0
AT2G41880	17.89	0	17.89	0	0	10.58
AT3G06650	17.89	0	0	17.89	0	0
AT3G14050	17.89	0	17.89	0	0	0
AT3G66652	17.89	0	0	17.89	0	0
AT4G00740	17.89	0	0	0	17.89	0
AT4G06744	17.89	0	0	0	0	17.89
AT5G01730	17.89	17.89	0	8.81	0	0
AT5G01734	17.89	0	0	17.89	0	8.81
AT5G01740	17.89	8.81	17.89	0	0	0
AT5G04330	17.89	0	6.43	17.89	0	0
AT5G10550	17.89	0	0	17.89	0	0
AT5G10560	17.89	0	0	0	0	17.89
AT3G19580	17.84	0	17.84	0	0	0
AT3G19590	17.84	0	0	17.84	0	0
AT1G12070	17.7	17.7	8.61	0	0	0
AT1G12080	17.7	8.61	17.7	0	0	6.83
AT1G65830	17.7	0	0	17.7	0	0
AT1G65840	17.7	10.19	17.7	0	0	0
AT1G69270	17.7	0	0	17.7	0	0
AT1G69770	17.7	17.7	0	0	0	0
AT1G69780	17.7	17.7	14.14	0	0	7.82
AT1G78040	17.7	0	0	17.7	0	0
AT1G78050	17.7	0	17.7	0	0	0
AT2G35160	17.7	0	0	0	0	17.7
AT2G35170	17.7	0	0	17.7	0	0
AT3G12560	17.7	0	0	17.7	0	0
AT3G12570	17.7	17.7	0	0	0	0
AT3G16180	17.7	0	6.43	0	17.7	0
AT3G23880	17.7	0	0	17.7	0	0
AT3G23890	17.7	0	17.7	0	0	0
AT3G48515	17.7	0	0	17.7	0	0
AT3G48520	17.7	0	0	0	17.7	0
AT3G61260	17.7	0	0	17.7	0	0
AT3G61270	17.7	0	17.7	0	0	0
AT4G09150	17.7	0	0	0	17.7	0
AT4G09153	17.7	0	17.7	0	0	0
AT4G11050	17.7	0	17.7	0	0	0
AT4G31590	17.7	0	0	17.7	0	6.43
AT4G35090	17.7	17.7	0	8.61	0	0
AT4G35100	17.7	17.7	0	12.36	6.43	14.34
AT5G39240	17.7	0	0	17.7	0	11.18
AT5G52900	17.7	0	0	11.77	17.7	0
AT5G52901	17.7	0	17.7	0	11.77	0
AT2G28405	17.51	0	0	0	0	17.51
AT1G01570	17.5	0	0	0	15.52	17.5
AT1G01580	17.5	15.52	17.5	0	0	0
AT1G33230	17.5	0	0	0	0	17.5
AT2G19180	17.5	0	0	17.5	0	0
AT2G38320	17.5	17.5	0	0	0	0
AT3G07360	17.5	0	10.98	17.5	0	0
AT3G13784	17.5	7.82	17.5	0	0	0
AT3G13790	17.5	0	0	0	7.42	17.5
AT3G15500	17.5	0	0	0	0	17.5
AT3G19270	17.5	17.5	0	0	0	0
AT3G19274	17.5	0	0	0	17.5	0
AT3G22380	17.5	6.24	7.22	9	0	17.5
AT4G27654	17.5	0	0	0	0	17.5
AT4G27657	17.5	0	0	17.5	0	0
AT4G37390	17.5	16.31	0	17.5	0	0
AT5G01750	17.5	11.77	0	0	0	17.5
AT5G01760	17.5	0	0	17.5	0	0
AT5G13700	17.5	0	0	17.5	0	0
AT5G13710	17.5	0	0	0	17.5	0
AT3G06580	17.44	8.41	17.44	0	0	0
AT3G06590	17.44	0	0	10.98	17.44	0
AT1G03170	17.3	0	0	0	0	17.3
AT1G03180	17.3	0	17.3	0	0	0
AT1G18870	17.3	6.43	0	0	17.3	0
AT1G24625	17.3	0	17.3	9.2	12.76	0
AT1G30110	17.3	0	0	17.3	0	0
AT1G69030	17.3	17.3	0	8.02	0	0
AT1G69890	17.3	0	0	17.3	0	0
AT2G19450	17.3	0	0	0	0	17.3
AT2G19460	17.3	0	17.3	0	0	0
AT2G27680	17.3	0	0	0	17.3	0
AT2G41100	17.3	0	0	9.4	0	17.3
AT2G41110	17.3	9.4	0	17.3	0	0
AT2G45200	17.3	0	17.3	7.22	0	0
AT2G45210	17.3	0	7.22	17.3	0	0
AT3G05900	17.3	0	0	17.3	0	6.83
AT3G05910	17.3	0	0	10.98	0	17.3
AT3G06050	17.3	17.3	0	0	0	0
AT3G09970	17.3	0	0	0	0	17.3
AT3G09975	17.3	17.3	0	11.18	0	0
AT3G13510	17.3	0	15.92	17.3	0	0
AT4G02500	17.3	0	0	0	0	17.3
AT4G02510	17.3	0	0	17.3	0	0
AT4G15540	17.3	0	8.41	0	0	17.3
AT4G15545	17.3	0	0	17.3	0	0
AT4G19430	17.3	0	0	17.3	0	0
AT4G19440	17.3	0	0	0	0	17.3
AT4G36930	17.3	0	9.2	17.3	0	0
AT4G36940	17.3	17.3	0	0	0	0
AT5G11260	17.3	0	0	17.3	0	0
AT5G11270	17.3	0	0	0	0	17.3
AT5G11280	17.3	17.3	0	0	0	0
AT5G38420	17.3	0	0	17.3	0	0
AT3G53420	17.15	0	17.15	0	0	0
AT1G26916	17.1	7.82	17.1	0	0	0
AT2G14960	17.1	0	0	17.1	0	0
AT3G56270	17.1	0	0	0	0	17.1
AT3G59930	17.1	0	17.1	0	0	0
AT3G59940	17.1	0	9.2	17.1	6.63	0
AT4G02300	17.1	0	0	0	0	17.1
AT4G35190	17.1	0	0	17.1	0	0
AT5G53640	17.1	17.1	0	0	0	0
AT5G53650	17.1	0	0	0	0	17.1
AT5G56040	17.1	0	0	0	0	17.1
AT5G59720	17.1	0	0	0	0	17.1
AT5G59730	17.1	0	7.03	11.18	17.1	0
AT5G59732	17.1	0	0	17.1	0	11.18
AT5G62350	17.1	0	17.1	0	0	16.71
AT4G31390	17.02	0	17.02	0	0	0
AT1G01930	16.91	16.91	0	0	0	0
AT1G01940	16.91	0	0	0	0	16.91
AT1G01950	16.91	0	0	16.91	0	0
AT1G14840	16.91	0	0	16.91	0	0
AT1G14850	16.91	0	0	0	0	16.91
AT1G26945	16.91	11.57	15.13	7.03	16.91	6.63
AT1G27213	16.91	0	16.91	10.58	10.78	12.96
AT1G27220	16.91	10.58	16.91	0	0	0
AT1G67230	16.91	0	0	16.91	0	0
AT1G79750	16.91	0	0	16.91	0	0
AT1G79760	16.91	0	0	16.91	0	0
AT1G79770	16.91	16.91	0	0	0	0
AT2G03550	16.91	0	0	16.91	0	0
AT2G03560	16.91	16.91	0	0	0	0
AT2G33040	16.91	0	0	16.91	0	0
AT2G33050	16.91	0	0	16.91	0	0
AT3G15470	16.91	0	0	16.91	0	0
AT3G16850	16.91	0	16.91	7.22	0	0
AT3G60190	16.91	0	0	16.91	0	0
AT3G60200	16.91	0	0	16.91	0	0
AT4G14770	16.91	0	16.91	0	0	0
AT5G02180	16.91	0	0	0	0	16.91
AT5G23210	16.91	0	0	0	16.91	0
AT5G25280	16.91	0	0	16.91	7.62	0
AT1G02060	16.71	0	16.71	0	0	0
AT1G02065	16.71	0	0	16.71	0	0
AT1G12440	16.71	0	0	16.71	0	0
AT1G12450	16.71	0	16.71	0	0	0
AT1G19840	16.71	0	16.71	8.41	0	15.72
AT1G64385	16.71	0	16.71	0	0	12.31
AT2G18260	16.71	0	0	0	0	16.71
AT2G18280	16.71	16.71	0	0	0	0
AT2G39220	16.71	0	16.71	0	0	0
AT3G02140	16.71	0	0	16.71	0	0
AT3G04910	16.71	0	16.71	0	0	12.21
AT3G51410	16.71	0	0	16.71	0	0
AT3G51420	16.71	0	16.71	0	0	0
AT3G54020	16.71	0	0	0	0	16.71
AT3G54030	16.71	16.71	6.83	0	0	0
AT3G61198	16.71	0	0	16.71	0	0
AT3G61200	16.71	0	0	0	0	16.71
AT5G01510	16.71	0	0	0	0	16.71
AT5G01520	16.71	0	0	16.71	0	6.63
AT5G01530	16.71	16.71	0	6.63	0	0
AT5G47500	16.71	0	0	16.71	9.4	0
AT5G47510	16.71	0	16.71	0	0	0
AT5G58900	16.71	0	8.61	0	0	16.71
AT5G62360	16.71	0	16.71	0	0	0
AT5G65980	16.71	0	0	0	0	16.71
AT5G65990	16.71	0	0	16.71	0	0
AT1G04550	16.51	0	0	16.51	0	0
AT1G04555	16.51	16.51	0	0	0	0
AT1G14690	16.51	16.51	0	0	0	0
AT1G14700	16.51	0	0	16.51	0	11.97
AT1G32650	16.51	0	0	0	0	16.51
AT1G32660	16.51	0	0	16.51	0	0
AT1G52560	16.51	16.51	0	0	0	0
AT1G54210	16.51	0	16.51	0	0	0
AT1G62370	16.51	0	0	0	16.51	0
AT1G64660	16.51	0	0	16.51	14.34	0
AT1G70510	16.51	0	0	0	16.51	0
AT2G02710	16.51	0	0	16.51	0	0
AT2G02720	16.51	0	16.51	0	0	0
AT2G26770	16.51	0	16.51	0	0	0
AT2G26780	16.51	0	0	16.51	0	0
AT2G47430	16.51	9.2	16.51	0	0	0
AT3G07005	16.51	0	0	0	0	16.51
AT3G07010	16.51	0	0	8.81	6.43	16.51
AT3G50660	16.51	0	0	6.43	16.51	0
AT3G52100	16.51	0	0	0	0	16.51
AT3G52105	16.51	0	0	16.51	0	0
AT3G52110	16.51	0	0	0	0	16.51
AT5G07280	16.51	0	0	16.51	0	0
AT5G19920	16.51	16.51	0	0	0	0
AT5G19930	16.51	0	0	16.51	0	0
AT5G19940	16.51	0	0	16.51	0	0
AT5G21990	16.51	0	16.51	0	0	0
AT5G25240	16.51	0	0	16.51	0	0
AT5G25250	16.51	16.51	0	0	0	0
AT5G64430	16.51	0	0	16.51	0	0
AT5G64440	16.51	0	16.51	0	0	0
AT5G65390	16.51	0	0	16.51	0	0
AT5G65400	16.51	0	16.51	0	0	0
AT4G10240	16.36	0	0	16.36	0	0
AT4G10250	16.36	0	0	16.36	0	0
AT1G10060	16.31	0	0	9.99	0	16.31
AT1G10070	16.31	0	0	16.31	0	0
AT1G14890	16.31	0	0	16.31	0	14.34
AT1G18990	16.31	16.31	0	9.99	0	0
AT1G19000	16.31	0	0	16.31	9.99	0
AT1G19010	16.31	16.31	0	0	0	0
AT1G21050	16.31	0	0	16.31	0	0
AT1G30825	16.31	16.31	0	14.14	0	0
AT2G19660	16.31	0	0	16.31	0	0
AT2G19670	16.31	0	0	0	0	16.31
AT2G19680	16.31	16.31	0	0	0	0
AT2G35710	16.31	0	0	0	0	16.31
AT3G07380	16.31	16.31	0	0	0	0
AT3G07390	16.31	0	16.31	0	15.92	0
AT4G16970	16.31	16.31	0	12.36	0	0
AT4G16980	16.31	0	0	12.36	0	16.31
AT4G16990	16.31	0	16.31	0	0	0
AT4G36030	16.31	0	16.31	6.24	0	6.43
AT4G36040	16.31	0	0	7.42	7.82	16.31
AT4G37380	16.31	16.31	0	0	0	0
AT5G01230	16.31	0	16.31	0	0	0
AT5G01240	16.31	0	0	16.31	6.83	0
AT5G01780	16.31	16.31	0	6.63	0	0
AT5G01790	16.31	0	0	16.31	0	6.63
AT5G01800	16.31	6.63	0	16.31	0	0
AT5G02260	16.31	0	16.31	0	0	0
AT5G46720	16.31	0	16.31	0	0	0
AT5G49690	16.31	16.12	0	16.31	0	0
AT5G49700	16.31	0	0	16.31	0	16.12
AT5G51460	16.31	0	0	16.31	0	0
AT1G13245	16.12	13.15	0	16.12	0	0
AT1G22360	16.12	0	0	16.12	0	0
AT1G22370	16.12	0	0	0	0	16.12
AT1G56630	16.12	0	16.12	0	0	0
AT2G24220	16.12	0	16.12	0	0	0
AT2G38090	16.12	0	0	0	16.12	0
AT2G39130	16.12	0	8.02	0	16.12	0
AT2G41945	16.12	0	0	0	16.12	10.98
AT2G41950	16.12	16.12	0	0	0	0
AT3G02570	16.12	0	0	16.12	0	0
AT3G02580	16.12	0	13.79	16.12	0	0
AT3G26520	16.12	0	0	0	0	16.12
AT3G54990	16.12	16.12	0	0	0	0
AT3G55000	16.12	16.12	0	0	0	0
AT3G58120	16.12	12.16	16.12	11.18	0	13.99
AT5G16200	16.12	0	0	16.12	0	0
AT5G16210	16.12	0	0	12.31	0	16.12
AT5G18015	16.12	15.92	0	16.12	0	0
AT5G18020	16.12	0	15.92	16.12	0	0
AT5G18030	16.12	0	16.12	15.92	0	0
AT5G24030	16.12	0	0	0	16.12	0
AT5G49710	16.12	0	16.12	0	0	0
AT5G65280	16.12	0	0	16.12	0	0
AT5G65290	16.12	0	0	16.12	0	0
AT5G66080	16.12	0	0	16.12	0	0
AT5G66090	16.12	0	0	16.12	0	0
AT4G00720	16.06	10.39	16.06	9.6	0	0
AT4G00730	16.06	0	0	0	10.39	16.06
AT1G11710	15.92	0	0	15.92	9.4	0
AT1G18270	15.92	15.92	0	0	0	0
AT1G18290	15.92	0	0	15.92	0	0
AT1G21900	15.92	9.6	15.92	0	0	0
AT1G21910	15.92	15.92	9.6	9	0	0
AT1G23070	15.92	15.92	0	0	0	7.82
AT1G23074	15.92	0	0	0	0	15.92
AT1G30560	15.92	0	0	0	0	15.92
AT1G30570	15.92	0	15.92	0	0	0
AT1G72280	15.92	0	0	15.92	0	0
AT1G72290	15.92	0	15.92	0	0	0
AT2G37170	15.92	0	15.92	7.82	0	0
AT2G37180	15.92	7.42	15.92	0	0	0
AT3G01470	15.92	0	0	15.92	6.63	0
AT3G01472	15.92	0	0	15.92	6.63	0
AT3G03810	15.92	0	0	15.92	0	0
AT3G03820	15.92	0	0	15.92	0	0
AT3G03826	15.92	0	0	15.92	0	0
AT3G03828	15.92	15.92	0	0	0	15.52
AT3G03860	15.92	0	0	0	0	15.92
AT3G03870	15.92	0	0	0	15.92	0
AT3G03880	15.92	15.92	0	0	0	0
AT3G07400	15.92	0	15.92	11.57	0	0
AT3G09032	15.92	15.92	0	0	0	0
AT3G09035	15.92	0	0	0	0	15.92
AT3G09040	15.92	0	0	0	0	15.92
AT3G09680	15.92	0	15.92	0	0	0
AT3G09690	15.92	0	0	15.92	0	0
AT3G13403	15.92	8.21	0	15.92	0	0
AT3G13404	15.92	8.21	0	15.92	0	0
AT3G13405	15.92	8.21	0	15.92	0	0
AT3G13490	15.92	15.92	0	0	0	6.83
AT3G17860	15.92	6.83	0	15.92	9.4	0
AT3G58640	15.92	0	0	15.92	0	0
AT4G02380	15.92	0	15.92	0	0	0
AT4G02390	15.92	0	15.92	0	0	0
AT4G18060	15.92	0	0	15.92	0	0
AT4G18070	15.92	0	0	15.92	0	0
AT4G22780	15.92	15.92	0	0	0	0
AT4G22785	15.92	0	0	15.92	0	0
AT4G34530	15.92	0	0	15.92	0	0
AT4G34540	15.92	0	0	15.92	0	0
AT5G03310	15.92	0	15.92	12.5	0	0
AT5G03320	15.92	12.5	0	15.92	0	0
AT5G03520	15.92	0	0	15.92	0	0
AT5G06920	15.92	0	0	0	0	15.92
AT5G06930	15.92	0	0	15.92	0	0
AT5G49370	15.92	15.92	0	0	0	0
AT5G53450	15.92	0	0	0	0	15.92
AT5G53451	15.92	0	0	15.92	0	0
AT5G64200	15.92	15.92	0	0	0	0
AT5G64210	15.92	0	0	15.92	0	0
AT5G64220	15.92	0	0	15.92	0	0
AT3G14205	15.78	15.78	0	0	0	0
AT1G10410	15.72	0	15.72	8.02	0	9.6
AT1G25270	15.72	0	0	0	0	15.72
AT1G25275	15.72	0	0	15.72	0	6.43
AT1G32090	15.72	0	15.72	0	0	9
AT1G32100	15.72	0	0	0	0	15.72
AT1G70400	15.72	0	15.72	0	0	0
AT1G70410	15.72	0	0	0	15.72	0
AT1G72810	15.72	0	15.72	10.78	0	0
AT1G72820	15.72	6.83	10.78	15.72	0	0
AT2G02870	15.72	0	15.72	0	0	0
AT2G28940	15.72	6.83	15.72	0	0	0
AT3G08580	15.72	0	0	15.72	0	7.22
AT3G08590	15.72	0	0	9.2	0	15.72
AT3G19820	15.72	15.72	0	0	7.22	0
AT3G20015	15.72	0	0	0	15.72	0
AT3G49670	15.72	0	8.21	0	0	15.72
AT3G49680	15.72	0	15.72	0	0	0
AT3G60030	15.72	0	0	15.72	0	0
AT4G03205	15.72	0	0	0	0	15.72
AT4G03210	15.72	0	0	15.72	0	0
AT4G03220	15.72	0	15.72	0	0	0
AT4G16780	15.72	0	15.72	0	0	10.19
AT4G19130	15.72	0	0	15.72	0	0
AT4G19140	15.72	0	0	15.72	0	0
AT4G20870	15.72	0	0	15.72	0	0
AT4G28630	15.72	0	0	15.72	0	0
AT4G28640	15.72	0	0	15.72	0	0
AT5G14680	15.72	15.72	0	0	0	0
AT5G14690	15.72	0	0	15.72	0	0
AT5G17840	15.72	0	0	15.72	0	0
AT5G17847	15.72	0	15.72	0	0	0
AT5G17850	15.72	0	15.72	0	0	0
AT5G23860	15.72	0	0	15.72	0	0
AT5G48530	15.72	0	15.72	0	0	0
AT5G48540	15.72	0	0	15.72	0	0
AT5G64250	15.72	0	15.72	0	0	0
AT1G06910	15.52	0	0	0	0	15.52
AT1G06920	15.52	0	0	0	0	15.52
AT1G06923	15.52	15.52	0	0	0	0
AT1G12570	15.52	0	15.52	0	0	0
AT1G12580	15.52	0	0	15.52	0	0
AT1G61740	15.52	0	0	0	15.52	0
AT1G70209	15.52	15.52	0	0	0	13.15
AT1G70210	15.52	0	0	13.15	15.52	7.62
AT1G70300	15.52	0	15.52	0	6.83	8.21
AT2G20100	15.52	0	0	0	15.52	0
AT2G27260	15.52	0	0	0	15.52	0
AT2G27270	15.52	15.52	0	0	0	0
AT2G28510	15.52	0	15.52	0	0	0
AT3G02590	15.52	15.52	0	0	0	0
AT3G03840	15.52	0	0	15.52	0	0
AT3G04920	15.52	12.21	15.52	0	0	0
AT3G05220	15.52	0	0	0	15.52	13.15
AT3G05230	15.52	0	15.52	13.15	0	0
AT3G17820	15.52	0	0	0	0	15.52
AT3G17830	15.52	0	15.52	0	0	0
AT3G28857	15.52	10.98	0	15.52	0	0
AT4G02130	15.52	0	15.52	0	7.22	0
AT4G28260	15.52	10.98	0	0	0	15.52
AT4G28270	15.52	0	0	0	6.83	15.52
AT4G29780	15.52	0	0	15.52	0	0
AT5G02640	15.52	0	0	15.52	0	0
AT5G02650	15.52	0	15.52	0	0	0
AT5G53400	15.52	0	0	0	0	15.52
AT5G62170	15.52	0	0	0	15.52	0
AT5G66460	15.52	0	0	15.52	0	7.22
AT5G66470	15.52	0	0	0	0	15.52
AT2G33175	15.47	15.47	0	0	0	0
AT2G33180	15.47	0	0	15.47	0	0
AT2G33190	15.47	15.47	0	0	0	0
AT3G29370	15.34	0	15.34	13.75	0	0
AT1G03980	15.33	15.33	0	0	0	0
AT1G03982	15.33	0	0	15.33	0	0
AT1G03990	15.33	0	0	15.33	0	6.87
AT1G05150	15.33	0	0	15.33	0	0
AT1G05160	15.33	0	0	0	0	15.33
AT1G22510	15.33	0	15.33	0	0	0
AT1G22520	15.33	0	0	15.33	0	0
AT1G22530	15.33	0	0	7.03	0	15.33
AT1G67900	15.33	0	0	15.33	7.42	0
AT2G05920	15.33	0	0	15.33	0	0
AT2G21170	15.33	0	0	15.33	0	0
AT2G27830	15.33	0	6.63	15.33	0	6.63
AT2G27840	15.33	15.33	0	6.63	14.93	0
AT2G38060	15.33	0	0	15.33	0	0
AT2G38070	15.33	15.33	0	0	0	0
AT2G39920	15.33	0	15.33	0	0	0
AT2G39930	15.33	0	0	15.33	0	0
AT2G42570	15.33	15.33	0	0	0	0
AT3G23690	15.33	0	0	15.33	0	0
AT3G23700	15.33	0	0	0	0	15.33
AT3G23710	15.33	15.33	0	0	0	0
AT3G48690	15.33	0	0	15.33	0	0
AT3G48700	15.33	0	0	0	0	15.33
AT3G48710	15.33	15.33	0	0	0	0
AT4G20060	15.33	0	15.33	0	0	0
AT4G20070	15.33	0	0	15.33	0	0
AT4G25760	15.33	6.63	0	0	0	15.33
AT5G05140	15.33	0	0	0	0	15.33
AT5G39860	15.33	15.33	0	9.6	0	0
AT5G65300	15.33	11.77	0	15.33	0	0
AT5G65305	15.33	0	9.2	11.77	0	15.33
AT5G43700	15.17	0	0	15.17	0	12.56
AT1G02230	15.13	0	0	15.13	0	6.83
AT1G02250	15.13	0	0	0	0	15.13
AT1G20450	15.13	0	0	15.13	0	0
AT1G20460	15.13	0	15.13	0	0	0
AT1G31300	15.13	0	0	0	0	15.13
AT1G65930	15.13	15.13	6.43	9.4	0	0
AT1G72470	15.13	0	0	15.13	0	0
AT1G73660	15.13	11.37	15.13	0	0	0
AT1G73670	15.13	0	0	15.13	0	0
AT2G33560	15.13	0	15.13	0	0	0
AT2G33570	15.13	0	0	15.13	0	0
AT3G03450	15.13	0	15.13	0	0	0
AT3G03456	15.13	0	0	15.13	0	0
AT3G03460	15.13	0	0	0	0	15.13
AT3G06120	15.13	0	0	0	0	15.13
AT3G06125	15.13	0	0	15.13	8.61	0
AT3G12955	15.13	0	15.13	0	0	0
AT3G12965	15.13	0	0	15.13	0	0
AT3G16400	15.13	0	0	0	0	15.13
AT3G22070	15.13	0	0	15.13	0	0
AT3G22072	15.13	0	0	0	0	15.13
AT3G46620	15.13	9.79	0	15.13	0	7.03
AT3G46630	15.13	0	0	9.79	0	15.13
AT3G46640	15.13	15.13	0	9.79	0	0
AT3G51550	15.13	0	0	15.13	0	0
AT3G51560	15.13	0	0	0	0	15.13
AT4G11540	15.13	15.13	0	0	0	0
AT5G15430	15.13	13.75	0	0	0	15.13
AT5G15440	15.13	0	0	15.13	0	0
AT5G23850	15.13	0	0	0	15.13	0
AT5G64610	15.13	0	0	15.13	0	0
AT5G64620	15.13	0	0	15.13	0	0
AT5G64630	15.13	15.13	0	0	0	0
AT4G18620	14.97	0	0	0	0	14.97
AT4G18630	14.97	0	14.97	0	0	0
AT5G51200	14.97	0	0	0	0	14.97
AT5G51210	14.97	0	0	14.97	0	0
AT1G08560	14.93	0	14.93	0	0	0
AT1G08570	14.93	0	0	14.93	0	0
AT1G12500	14.93	0	14.93	0	0	0
AT1G12510	14.93	0	0	0	0	14.93
AT1G12520	14.93	0	0	0	0	14.93
AT1G28590	14.93	0	0	0	0	14.93
AT1G29270	14.93	0	14.93	0	0	0
AT1G66235	14.93	0	14.93	0	0	0
AT1G73687	14.93	0	0	14.93	0	0
AT1G73690	14.93	0	14.93	0	0	0
AT1G75200	14.93	0	0	14.73	0	14.93
AT2G27850	14.93	13.35	0	0	0	14.93
AT2G27860	14.93	0	0	13.35	0	14.93
AT2G41940	14.93	14.93	0	0	0	10.98
AT3G06760	14.93	0	14.93	0	12.96	0
AT3G24710	14.93	0	14.93	0	0	0
AT3G24715	14.93	0	0	14.93	0	0
AT3G44300	14.93	0	0	0	0	14.93
AT3G61420	14.93	0	14.93	0	0	0
AT3G61430	14.93	0	0	14.93	0	0
AT3G61440	14.93	14.93	0	0	0	0
AT4G15236	14.93	0	14.93	0	0	0
AT4G18020	14.93	0	0	0	14.93	0
AT4G32290	14.93	0	0	14.93	0	0
AT4G32295	14.93	0	14.93	0	0	0
AT4G38570	14.93	0	0	14.93	0	0
AT4G38580	14.93	0	0	14.93	0	0
AT4G38590	14.93	0	14.93	0	0	0
AT5G53510	14.93	0	14.93	0	0	0
AT1G05805	14.73	0	0	8.02	10.58	14.73
AT1G05810	14.73	10.58	0	14.73	0	0
AT1G05820	14.73	0	14.73	0	0	0
AT1G21990	14.73	0	0	0	0	14.73
AT1G23020	14.73	14.73	8.81	10.19	0	0
AT1G23030	14.73	0	8.81	14.73	0	0
AT1G31310	14.73	0	0	0	0	14.73
AT1G48330	14.73	11.37	0	14.73	0	0
AT1G49220	14.73	0	0	14.73	0	0
AT1G75210	14.73	0	0	14.73	0	0
AT1G77280	14.73	0	0	0	14.73	0
AT1G77290	14.73	14.73	0	0	0	0
AT2G17290	14.73	0	0	7.82	0	14.73
AT2G17295	14.73	0	0	14.73	0	0
AT2G22795	14.73	14.73	0	0	0	11.37
AT2G25460	14.73	0	0	14.73	0	0
AT2G25470	14.73	14.73	0	0	0	0
AT2G28355	14.73	0	14.73	0	0	0
AT2G34710	14.73	12.96	6.43	14.73	0	0
AT2G40620	14.73	0	0	0	0	14.73
AT2G44820	14.73	14.73	0	0	0	0
AT3G14360	14.73	0	14.73	0	0	0
AT3G19553	14.73	0	0	14.73	0	0
AT3G19560	14.73	0	0	14.73	0	0
AT3G20300	14.73	0	0	14.73	0	0
AT3G26210	14.73	0	0	14.73	0	0
AT3G26220	14.73	0	0	0	0	14.73
AT3G50330	14.73	0	0	8.21	14.73	0
AT3G56340	14.73	14.73	0	0	0	0
AT3G56350	14.73	0	0	14.73	0	0
AT3G56360	14.73	0	0	14.73	0	0
AT3G63003	14.73	13.75	14.73	0	0	0
AT3G63006	14.73	13.75	14.73	0	0	0
AT3G63010	14.73	0	14.73	13.75	0	0
AT4G00800	14.73	0	14.73	0	0	0
AT4G00810	14.73	0	6.63	14.73	0	0
AT4G14760	14.73	14.73	0	0	0	0
AT4G27330	14.73	14.73	0	0	0	0
AT5G01070	14.73	0	7.03	14.73	0	0
AT5G01075	14.73	0	0	0	0	14.73
AT5G14920	14.73	0	6.5	12.16	14.73	0
AT5G14930	14.73	12.16	0	14.73	0	0
AT5G48250	14.73	0	0	14.73	0	0
AT5G48270	14.73	0	0	0	0	14.73
AT3G26510	14.68	0	14.68	0	7.22	0
AT3G26511	14.68	0	0	14.68	0	0
AT1G02800	14.54	0	0	14.54	0	0
AT1G02810	14.54	0	14.54	0	0	7.86
AT1G17110	14.54	0	0	14.54	0	0
AT1G17120	14.54	0	0	14.54	0	0
AT1G17130	14.54	14.54	0	0	0	0
AT1G22190	14.54	6.24	14.54	0	0	0
AT1G25540	14.54	0	14.54	0	0	0
AT1G25550	14.54	0	0	14.54	0	13.55
AT1G48350	14.54	0	14.54	0	0	0
AT1G67880	14.54	0	0	14.54	0	0
AT1G67890	14.54	0	14.54	0	0	0
AT1G72160	14.54	0	0	0	0	14.54
AT1G73470	14.54	0	0	0	0	14.54
AT1G73480	14.54	0	0	14.54	0	0
AT1G75388	14.54	0	14.54	0	0	0
AT1G75390	14.54	0	14.54	0	0	0
AT1G77480	14.54	0	0	14.54	0	0
AT1G77490	14.54	0	0	14.54	0	13.75
AT2G21650	14.54	0	14.54	0	0	0
AT2G29450	14.54	0	0	14.54	0	0
AT2G29452	14.54	0	0	0	14.54	0
AT2G29460	14.54	0	0	0	0	14.54
AT2G42388	14.54	0	11.77	14.54	0	0
AT2G47160	14.54	0	14.54	0	0	0
AT3G13310	14.54	0	14.54	7.22	0	0
AT3G13320	14.54	14.54	0	0	0	0
AT4G00760	14.54	14.54	0	0	0	0
AT4G00770	14.54	0	0	0	14.54	0
AT4G00780	14.54	14.54	0	0	0	0
AT4G03320	14.54	0	0	0	0	14.54
AT4G03330	14.54	0	0	14.54	0	0
AT4G30120	14.54	0	0	14.54	0	0
AT4G30130	14.54	0	0	14.54	0	0
AT5G16600	14.54	14.54	9.6	0	0	0
AT5G24870	14.54	0	0	14.54	0	0
AT5G47360	14.54	14.54	0	0	0	0
AT5G51790	14.54	0	14.54	0	0	0
AT5G52890	14.54	14.54	0	0	0	0
AT5G53410	14.54	14.54	0	0	0	0
AT5G54290	14.54	0	14.54	9	0	9.99
AT5G60870	14.54	14.54	0	0	0	0
AT5G60880	14.54	0	14.54	0	0	0
AT5G65310	14.54	0	14.54	0	7.62	7.03
AT3G07460	14.48	14.48	0	14.34	0	0
AT3G07470	14.48	0	0	14.48	0	0
AT3G07480	14.48	0	0	14.48	0	0
AT3G07490	14.48	14.48	0	0	0	0
AT1G05010	14.34	0	14.34	0	0	0
AT1G05020	14.34	0	0	0	0	14.34
AT1G09380	14.34	14.34	0	0	0	0
AT1G09390	14.34	0	0	0	14.34	0
AT1G14900	14.34	0	0	10.39	0	14.34
AT1G15110	14.34	6.83	9.6	0	0	14.34
AT1G15120	14.34	0	0	14.34	0	0
AT1G15125	14.34	14.34	0	0	0	0
AT1G24600	14.34	0	0	14.34	0	0
AT1G31875	14.34	14.34	0	0	0	0
AT1G31880	14.34	0	0	14.34	0	0
AT1G55870	14.34	0	0	0	0	14.34
AT1G55880	14.34	0	0	0	14.34	0
AT1G55890	14.34	14.34	0	0	0	0
AT2G20980	14.34	0	0	14.34	0	0
AT2G20990	14.34	0	0	14.34	0	0
AT2G22160	14.34	14.34	0	0	0	0
AT2G22170	14.34	0	0	14.34	0	0
AT2G22180	14.34	0	0	14.34	0	0
AT2G22990	14.34	0	9.99	14.34	0	7.22
AT2G39865	14.34	0	0	10.78	14.34	0
AT2G39870	14.34	0	14.34	10.78	0	0
AT2G41420	14.34	0	14.34	0	0	0
AT2G41430	14.34	0	0	14.34	0	0
AT2G41440	14.34	14.34	0	0	0	0
AT3G04420	14.34	0	0	0	0	14.34
AT3G04430	14.34	0	0	0	0	14.34
AT3G07450	14.34	0	14.34	0	0	0
AT3G45850	14.34	0	14.34	0	0	0
AT3G45860	14.34	0	0	0	0	14.34
AT3G49790	14.34	0	0	11.57	14.34	0
AT3G49796	14.34	14.34	11.57	0	0	0
AT3G56050	14.34	0	0	14.34	0	0
AT4G03280	14.34	0	0	14.34	0	0
AT4G03285	14.34	14.34	0	0	0	0
AT4G03290	14.34	14.34	0	0	0	0
AT4G24050	14.34	0	0	0	0	14.34
AT4G29190	14.34	0	0	14.34	0	6.83
AT4G37840	14.34	0	0	14.34	0	0
AT5G11060	14.34	0	14.34	0	0	9.4
AT5G11740	14.34	0	0	14.34	6.43	0
AT5G14640	14.34	0	0	14.34	0	0
AT5G14650	14.34	0	14.34	0	0	0
AT5G16567	14.34	0	0	0	14.34	12.56
AT5G49360	14.34	0	14.34	0	12.76	0
AT5G66558	14.34	0	14.34	0	0	0
AT5G66564	14.34	0	0	0	0	14.34
AT5G66567	14.34	0	0	0	0	14.34
AT5G66568	14.34	0	0	0	0	14.34
AT5G66570	14.34	0	0	14.34	0	0
AT5G67390	14.34	0	0	14.34	0	12.96
AT1G20900	14.18	0	14.18	0	0	0
AT1G14270	14.14	10.19	0	14.14	0	0
AT1G14280	14.14	0	0	14.14	0	10.19
AT1G17940	14.14	0	14.14	0	0	0
AT1G20070	14.14	0	0	14.14	0	0
AT1G20080	14.14	14.14	0	0	0	0
AT1G53450	14.14	0	0	14.14	0	0
AT1G53460	14.14	0	0	0	0	14.14
AT1G72990	14.14	0	0	14.14	0	0
AT1G73000	14.14	0	0	14.14	0	0
AT2G14890	14.14	0	0	13.15	14.14	0
AT2G23118	14.14	14.14	0	0	7.42	0
AT2G23130	14.14	7.42	0	14.14	0	0
AT2G32500	14.14	0	14.14	0	0	0
AT2G32510	14.14	0	0	0	14.14	0
AT2G34150	14.14	14.14	0	0	0	0
AT2G34160	14.14	0	0	14.14	0	0
AT2G34170	14.14	14.14	0	0	0	0
AT2G39950	14.14	0	0	14.14	0	0
AT2G39960	14.14	0	0	0	0	14.14
AT2G46040	14.14	0	0	0	14.14	0
AT2G46050	14.14	0	0	14.14	0	0
AT3G02110	14.14	14.14	0	0	0	0
AT3G02120	14.14	0	0	14.14	0	0
AT3G02125	14.14	0	14.14	0	0	0
AT3G08630	14.14	0	0	0	0	14.14
AT3G08636	14.14	0	0	0	14.14	0
AT3G08640	14.14	0	0	14.14	0	0
AT3G14740	14.14	14.14	0	0	0	0
AT3G14750	14.14	0	0	14.14	0	0
AT3G14760	14.14	0	0	14.14	0	0
AT3G15710	14.14	14.14	0	0	0	0
AT3G15720	14.14	0	0	14.14	0	0
AT3G15730	14.14	14.14	0	0	0	0
AT3G50450	14.14	0	0	14.14	0	0
AT3G52840	14.14	0	0	8.02	14.14	0
AT3G52910	14.14	14.14	0	0	0	0
AT3G62570	14.14	0	10.58	9.2	0	14.14
AT3G62580	14.14	0	14.14	0	0	0
AT3G63060	14.14	0	0	14.14	0	0
AT3G63070	14.14	0	0	14.14	0	0
AT4G10550	14.14	14.14	0	0	0	0
AT4G10560	14.14	0	0	14.14	0	0
AT4G10570	14.14	0	0	0	0	14.14
AT4G19700	14.14	0	14.14	0	0	6.63
AT4G25470	14.14	0	14.14	13.35	0	0
AT5G14780	14.14	0	0	0	0	14.14
AT5G18460	14.14	0	0	0	6.83	14.14
AT5G18470	14.14	0	0	14.14	0	0
AT5G22920	14.14	0	0	8.61	0	14.14
AT5G22930	14.14	0	0	0	0	14.14
AT5G65430	14.14	0	0	14.14	0	0
AT5G65440	14.14	0	0	14.14	0	6.83
AT5G45100	14.08	14.08	0	0	0	0
AT1G01430	13.94	0	0	13.94	0	12.76
AT1G01440	13.94	0	0	6.43	0	13.94
AT1G04310	13.94	0	0	13.94	0	0
AT1G04320	13.94	0	13.94	0	0	0
AT1G04684	13.94	13.94	0	0	0	0
AT1G04690	13.94	0	0	13.94	0	0
AT1G12423	13.94	0	0	0	0	13.94
AT1G18640	13.94	0	0	13.94	0	0
AT1G18650	13.94	0	0	0	13.94	0
AT1G18660	13.94	13.94	0	0	0	0
AT1G52700	13.94	0	13.94	0	0	0
AT1G68620	13.94	0	0	13.94	10.78	0
AT1G68630	13.94	13.94	0	0	0	0
AT1G69560	13.94	0	0	0	13.94	0
AT1G70270	13.94	0	13.94	9.99	0	0
AT1G80300	13.94	0	13.94	0	0	0
AT2G18720	13.94	0	13.94	0	0	0
AT2G18721	13.94	0	0	0	0	13.94
AT2G18730	13.94	0	0	13.94	0	0
AT2G37670	13.94	13.94	0	0	0	0
AT2G37678	13.94	0	0	13.94	0	0
AT2G37680	13.94	0	0	0	0	13.94
AT2G37690	13.94	13.94	0	0	0	0
AT3G05165	13.94	0	13.94	0	0	0
AT3G05170	13.94	0	13.94	0	0	0
AT3G11590	13.94	13.94	0	9	0	0
AT3G13810	13.94	12.31	0	0	0	13.94
AT3G13820	13.94	0	13.94	0	0	0
AT3G60070	13.94	0	6.63	13.94	0	0
AT3G60075	13.94	0	0	6.63	0	13.94
AT3G60080	13.94	0	0	13.94	6.63	0
AT3G61960	13.94	13.94	0	6.62	0	0
AT3G61962	13.94	0	0	13.94	0	0
AT4G17280	13.94	0	0	13.94	0	0
AT4G17300	13.94	0	0	13.94	0	0
AT4G18700	13.94	0	0	9	0	13.94
AT4G37240	13.94	0	0	13.94	0	0
AT5G03760	13.94	6.83	0	0	13.94	0
AT5G64401	13.94	13.94	0	0	0	0
AT5G64410	13.94	0	0	0	13.94	0
AT1G55210	13.93	0	0	13.93	0	0
AT1G18610	13.75	0	0	0	0	13.75
AT1G18620	13.75	0	0	13.75	0	0
AT1G19460	13.75	0	0	13.75	0	0
AT1G19464	13.75	13.75	0	0	0	0
AT1G50020	13.75	0	0	13.75	0	0
AT1G50030	13.75	0	0	0	0	13.75
AT1G70530	13.75	0	13.75	9	0	0
AT1G70540	13.75	9	13.75	0	0	0
AT1G71070	13.75	13.75	0	0	0	0
AT1G71080	13.75	0	0	13.75	0	0
AT1G71090	13.75	0	0	13.75	0	0
AT1G71100	13.75	13.75	0	0	0	11.97
AT1G72000	13.75	0	0	0	0	13.75
AT1G72010	13.75	0	13.75	0	0	0
AT1G72390	13.75	0	0	0	13.75	0
AT1G77500	13.75	0	0	13.75	0	0
AT2G44490	13.75	0	10.19	0	0	13.75
AT2G46820	13.75	0	0	0	0	13.75
AT2G46830	13.75	0	0	13.75	0	0
AT3G06500	13.75	0	0	13.75	0	7.42
AT3G16570	13.75	0	0	0	0	13.75
AT3G18170	13.75	0	0	0	13.75	0
AT3G18180	13.75	0	13.75	0	0	0
AT3G29375	13.75	13.75	0	0	0	0
AT3G50240	13.75	0	0	13.75	0	0
AT3G50250	13.75	6.43	0	0	0	13.75
AT3G51940	13.75	0	13.75	0	0	0
AT3G51950	13.75	0	7.22	7.56	8.81	13.75
AT3G53250	13.75	13.75	0	0	0	0
AT3G55840	13.75	13.75	0	0	0	0
AT3G55850	13.75	0	0	0	8.21	13.75
AT3G57040	13.75	0	0	13.75	0	0
AT3G60750	13.75	0	0	0	0	13.75
AT3G60760	13.75	0	0	0	0	13.75
AT3G61640	13.75	0	0	13.75	0	0
AT4G10150	13.75	0	0	0	13.75	0
AT4G15160	13.75	0	0	0	13.75	0
AT4G27730	13.75	9	7.03	13.75	0	0
AT4G27740	13.75	13.75	7.03	9	0	0
AT4G28230	13.75	0	8.93	13.75	0	0
AT4G28240	13.75	0	0	8.93	13.75	0
AT4G29260	13.75	0	13.75	0	0	0
AT4G29270	13.75	0	0	13.75	0	0
AT4G29273	13.75	0	0	0	0	13.75
AT4G37470	13.75	0	0	13.75	10.19	0
AT4G37480	13.75	10.19	0	13.75	0	0
AT5G03280	13.75	0	13.75	0	0	9.6
AT5G13720	13.75	0	13.75	6.63	0	0
AT5G15410	13.75	0	0	13.75	0	0
AT5G15420	13.75	0	0	0	0	13.75
AT5G15580	13.75	0	12.16	13.75	6.83	0
AT5G15581	13.75	0	0	0	6.83	13.75
AT5G41070	13.75	0	0	0	0	13.75
AT5G41071	13.75	0	0	0	0	13.75
AT5G41080	13.75	0	13.75	8.61	0	0
AT5G55090	13.75	0	13.75	0	0	0
AT5G58620	13.75	0	13.75	7.82	0	0
AT1G23360	13.55	13.55	7.62	0	0	0
AT1G30690	13.55	0	0	13.55	0	0
AT1G32700	13.55	0	0	13.55	0	0
AT1G46408	13.55	13.55	0	0	0	0
AT1G49450	13.55	0	0	0	13.55	0
AT1G49460	13.55	0	13.55	0	0	0
AT1G50890	13.55	0	0	13.55	0	0
AT1G50900	13.55	0	0	13.55	0	0
AT1G50910	13.55	0	0	0	0	13.55
AT2G20721	13.55	0	13.55	0	0	0
AT2G20722	13.55	0	13.55	0	0	0
AT2G20723	13.55	0	13.55	0	0	0
AT2G20725	13.55	0	0	0	0	13.55
AT2G20740	13.55	13.55	0	0	0	0
AT2G36270	13.55	0	0	13.55	8.21	0
AT2G36280	13.55	0	0	0	0	13.55
AT2G36290	13.55	0	0	0	0	13.55
AT2G36870	13.55	0	6.63	13.55	0	0
AT2G37930	13.55	0	9.4	0	0	13.55
AT2G37940	13.55	0	13.55	0	0	0
AT2G45820	13.55	9.4	0	13.55	0	0
AT2G45830	13.55	0	0	13.55	9.4	0
AT3G03200	13.55	13.55	7.42	0	0	0
AT3G03210	13.55	0	0	13.55	0	0
AT3G28100	13.55	0	0	0	13.55	0
AT4G25640	13.55	0	9.2	13.55	0	0
AT4G32890	13.55	0	0	0	6.43	13.55
AT4G35470	13.55	0	0	13.15	0	13.55
AT4G36970	13.55	0	13.55	0	0	0
AT4G36980	13.55	0	0	0	0	13.55
AT4G39770	13.55	0	0	13.55	0	0
AT5G02760	13.55	13.55	10.39	10.78	0	0
AT5G13220	13.55	0	0	0	13.55	0
AT5G13230	13.55	0	13.55	0	0	0
AT5G13240	13.55	0	0	13.55	0	0
AT5G24590	13.55	0	0	13.55	0	0
AT5G24593	13.55	0	0	13.55	0	0
AT5G51550	13.55	13.55	0	11.77	0	0
AT5G51560	13.55	13.55	0	0	0	0
AT5G53010	13.55	13.55	0	0	0	0
AT5G53020	13.55	0	0	13.55	0	0
AT5G65683	13.55	0	0	0	13.55	9.99
AT5G66631	13.55	0	0	0	0	13.55
AT5G66640	13.55	0	13.55	0	0	0
AT1G07970	13.49	13.49	0	0	0	0
AT1G07980	13.49	0	0	13.49	0	0
AT1G07985	13.49	0	0	13.49	0	0
AT1G07990	13.49	0	13.49	0	0	0
AT1G22060	13.39	0	13.39	0	0	0
AT4G23060	13.39	0	11.57	13.39	0	0
AT1G10090	13.35	0	0	13.35	0	0
AT1G10095	13.35	0	0	0	0	13.35
AT1G19835	13.35	13.35	0	0	0	0
AT1G20880	13.35	13.35	0	0	0	6.43
AT1G20890	13.35	0	0	13.35	0	0
AT1G56590	13.35	8.02	0	13.35	0	0
AT1G56600	13.35	13.35	0	8.02	0	0
AT1G77700	13.35	6.83	13.35	0	0	0
AT2G01440	13.35	0	0	0	0	13.35
AT2G03240	13.35	0	0	13.35	0	0
AT2G07050	13.35	0	0	7.82	0	13.35
AT2G21510	13.35	0	13.35	0	0	6.63
AT2G21520	13.35	0	13.35	6.63	0	0
AT2G23755	13.35	0	11.57	13.35	0	0
AT2G32710	13.35	0	0	0	0	13.35
AT2G32720	13.35	0	0	0	0	13.35
AT2G39760	13.35	0	0	0	0	13.35
AT2G39770	13.35	0	13.35	0	0	0
AT2G45970	13.35	0	0	0	10.58	13.35
AT2G46787	13.35	0	0	0	13.35	0
AT2G46790	13.35	0	0	13.35	0	0
AT3G01490	13.35	0	0	13.35	0	0
AT3G06770	13.35	0	13.35	0	0	0
AT3G25716	13.35	13.35	0	9.2	11.57	10.98
AT3G25717	13.35	0	0	13.35	0	0
AT3G27350	13.35	0	0	0	0	13.35
AT3G60220	13.35	0	13.35	0	0	0
AT3G63500	13.35	0	0	13.35	0	0
AT3G63510	13.35	0	0	13.35	0	0
AT3G63520	13.35	13.35	0	0	0	0
AT4G01510	13.35	0	0	13.35	0	0
AT4G13395	13.35	0	13.35	0	0	0
AT4G13400	13.35	0	0	0	0	13.35
AT4G17670	13.35	0	6.24	13.35	0	0
AT4G18540	13.35	13.35	0	0	0	0
AT4G18550	13.35	0	0	0	13.35	0
AT4G25450	13.35	13.35	0	0	0	0
AT4G38400	13.35	0	0	13.35	0	0
AT4G38401	13.35	0	0	13.35	0	0
AT4G38405	13.35	0	0	0	0	13.35
AT4G38410	13.35	0	0	13.35	0	0
AT4G39070	13.35	9.6	0	8.41	13.35	0
AT4G39080	13.35	13.35	0	9.6	0	0
AT3G18070	13.29	0	0	0	0	13.29
AT3G18080	13.29	0	0	13.29	0	0
AT1G19180	13.2	0	13.2	0	0	0
AT1G19190	13.2	13.2	0	0	0	0
AT4G11550	13.2	0	13.2	0	0	0
AT4G11560	13.2	0	0	0	0	13.2
AT1G13250	13.15	12.36	0	0	13.15	0
AT1G29970	13.15	13.15	0	0	0	0
AT1G73680	13.15	0	0	0	13.15	0
AT1G79060	13.15	0	0	8.61	13.15	10.19
AT1G79075	13.15	13.15	10.19	0	0	0
AT2G22802	13.15	0	13.15	0	0	0
AT2G22805	13.15	0	13.15	0	0	0
AT2G41630	13.15	13.15	0	0	0	0
AT2G41640	13.15	0	0	13.15	0	0
AT3G15520	13.15	11.18	0	13.15	0	0
AT3G15530	13.15	0	0	11.18	0	13.15
AT3G18830	13.15	0	0	13.15	0	0
AT3G24542	13.15	0	0	0	0	13.15
AT3G24550	13.15	13.15	0	0	0	0
AT3G45610	13.15	0	0	13.15	0	0
AT3G61910	13.15	0	0	0	13.15	0
AT4G03415	13.15	13.15	0	0	0	0
AT4G17700	13.15	13.15	0	0	0	0
AT4G19420	13.15	0	0	13.15	0	0
AT4G35070	13.15	0	13.15	0	0	0
AT5G13290	13.15	0	0	13.15	0	0
AT5G13300	13.15	0	0	0	0	13.15
AT5G15340	13.15	0	0	13.15	0	0
AT5G15350	13.15	0	0	0	0	13.15
AT5G20620	13.15	8.45	13.15	0	0	0
AT5G20630	13.15	0	8.45	13.15	0	0
AT5G20700	13.15	0	13.15	0	0	0
AT5G20710	13.15	13.15	0	0	0	0
AT5G25190	13.15	13.15	0	7.03	0	0
AT1G08490	13.14	8.06	0	13.14	0	0
AT1G08500	13.14	0	0	13.14	0	0
AT1G29630	13.1	0	0	0	0	13.1
AT3G53550	13.1	0	13.1	0	0	0
AT1G45130	13	13	0	0	0	0
AT1G07000	12.96	0	0	12.96	0	0
AT1G07010	12.96	0	0	12.96	0	0
AT1G10020	12.96	0	0	12.96	0	0
AT1G10030	12.96	0	12.96	0	0	0
AT1G26150	12.96	0	0	12.96	0	0
AT1G26160	12.96	0	0	0	0	12.96
AT1G27210	12.96	10.78	12.96	0	0	6.63
AT1G55330	12.96	12.96	6.24	8.81	10.19	10.98
AT1G55340	12.96	8.81	6.24	12.96	0	0
AT1G70080	12.96	12.96	0	0	0	0
AT1G70090	12.96	0	0	12.96	0	6.43
AT1G70100	12.96	12.96	0	6.43	0	0
AT1G70700	12.96	0	0	0	0	12.96
AT1G73370	12.96	0	0	12.96	0	0
AT1G73380	12.96	0	0	12.96	0	0
AT1G78290	12.96	0	12.96	0	0	0
AT1G78300	12.96	0	0	12.96	0	0
[truncated: 2,585 more rows]
