# Supplementary material for: Cell elongation is regulated through a central circuit of interacting transcription factors in the Arabidopsis hypocotyl
Source: eLife. 2014 May 27;3:e03031. doi: 10.7554/eLife.03031 (PMC4075450; doi:10.7554/eLife.03031)
Supplement: Figure 1—source data 2. — 30 or 120 min: genes are activated after 30 or 120 min of auxin treatment. DOI: http://dx.doi.org/10.7554/eLife.03031.005 [file elife03031s002.xlsx]

## Sheet: Sheet1
Figure 1-source data 2. Auxin-activated genes previously identified in hypocotyls (Chapman et al., 2012) were compared with ARF6 target genes identified by ChIP-Seq to identify the auxin-activated ARF6 target genes in hypocotyls. 30 or 120 min : genes are activatedafter 30 or 120 min of auxin treatment.
Gene	Time
AT1G78100	30 min
AT1G13245	30 min
AT4G38840	30 min
AT2G21200	30 min
AT2G21210	30 min
AT3G25717	30 min
AT4G13790	30 min
AT4G37390	30 min , 120 min
AT4G17460	30 min , 120 min
AT3G50800	30 min , 120 min
AT4G14560	30 min , 120 min
AT5G52900	30 min , 120 min
AT1G29490	30 min , 120 min
AT1G29500	30 min , 120 min
AT1G29510	30 min , 120 min
AT5G41400	30 min , 120 min
AT2G42430	30 min , 120 min
AT1G15580	30 min , 120 min
AT2G14960	30 min , 120 min
AT3G03830	30 min , 120 min
AT3G03850	30 min , 120 min
AT4G38850	30 min , 120 min
AT3G29370	30 min , 120 min
AT5G18080	30 min , 120 min
AT5G18010	30 min , 120 min
AT5G18050	30 min , 120 min
AT5G18060	30 min , 120 min
AT5G18020	30 min , 120 min
AT5G18030	30 min , 120 min
AT4G38820	30 min , 120 min
AT1G29420	30 min , 120 min
AT1G29430	30 min , 120 min
AT1G29450	30 min , 120 min
AT1G29460	30 min , 120 min
AT2G18010	30 min , 120 min
AT3G03840	30 min , 120 min
AT1G29440	30 min , 120 min
AT1G54120	30 min , 120 min
AT3G28857	30 min , 120 min
AT3G03820	30 min , 120 min
AT2G23170	120 min
AT3G15540	120 min
AT3G23030	120 min
AT1G67900	120 min
AT5G66580	120 min
AT5G66590	120 min
AT4G34760	120 min
AT5G47370	120 min
AT1G31880	120 min
AT1G69570	120 min
AT3G12920	120 min
AT2G35880	120 min
AT1G02660	120 min
AT4G12120	120 min
AT1G75490	120 min
AT5G44260	120 min
AT3G14370	120 min
AT1G18400	120 min
AT1G04240	120 min
AT1G49780	120 min
AT1G70940	120 min
AT5G02760	120 min
AT5G57050	120 min
AT5G54510	120 min
AT5G22940	120 min
AT5G43700	120 min
AT5G58620	120 min
AT1G21980	120 min
AT5G47380	120 min
AT2G34150	120 min
AT3G29575	120 min
AT2G42440	120 min
AT4G20170	120 min
AT3G62100	120 min
AT3G23640	120 min
AT1G20900	120 min
AT3G17860	120 min
AT4G26690	120 min
AT3G62090	120 min
AT1G69260	120 min
AT5G08790	120 min
AT4G09890	120 min
AT5G65300	120 min
AT3G02570	120 min
AT1G52750	120 min
AT1G75080	120 min
AT1G29290	120 min
AT1G10020	120 min
AT2G47060	120 min
AT3G60640	120 min
AT3G60650	120 min
AT1G19180	120 min
AT2G41820	120 min
AT3G44200	120 min
AT3G54510	120 min
AT5G02200	120 min
AT2G20370	120 min
AT5G66310	120 min
AT1G11120	120 min
AT1G30690	120 min
AT1G70950	120 min
AT3G23050	120 min
AT4G32280	120 min
AT3G19680	120 min
AT1G08500	120 min
AT1G22882	120 min
AT1G78260	120 min
AT2G07981	120 min
AT4G36780	120 min
AT3G18710	120 min
AT3G62630	120 min
AT5G06930	120 min
AT1G52830	120 min
AT1G80280	120 min
AT2G30040	120 min
AT3G07010	120 min
AT3G44610	120 min
AT3G58620	120 min
AT5G01730	120 min
AT5G01740	120 min
AT5G08130	120 min
AT4G13195	120 min
AT5G52280	120 min
AT1G55870	120 min
AT2G36220	120 min
AT1G09350	120 min
AT1G64640	120 min
AT2G22125	120 min
AT3G62660	120 min
AT5G03730	120 min
AT5G07110	120 min
AT5G64330	120 min
AT2G01420	120 min
AT3G04910	120 min
AT4G16515	120 min
AT4G22780	120 min
AT4G26080	120 min
AT5G45580	120 min
AT5G01210	120 min
AT5G39860	120 min
AT3G03170	120 min
AT3G06080	120 min
AT4G35470	120 min
AT4G37590	120 min
AT4G39840	120 min
AT5G57780	120 min
AT1G03790	120 min
AT1G03800	120 min
AT1G26945	120 min
AT2G37940	120 min
AT3G30775	120 min
AT3G60200	120 min
AT5G07760	120 min
AT5G50335	120 min
AT5G57090	120 min
AT5G62220	120 min
AT5G62280	120 min
AT1G14920	120 min
AT1G33240	120 min
AT1G34110	120 min
AT2G40260	120 min
AT2G41100	120 min
AT2G44080	120 min
AT3G50340	120 min
AT4G24275	120 min
AT5G49690	120 min
AT5G49700	120 min
AT5G62170	120 min
AT1G73480	120 min
AT3G05230	120 min
AT3G27580	120 min
AT4G12420	120 min
AT4G28490	120 min
AT5G41080	120 min
AT5G53290	120 min
AT1G19870	120 min
AT1G20980	120 min
AT1G61100	120 min
AT2G41070	120 min
AT5G05180	120 min
AT5G07010	120 min
AT5G56040	120 min
AT1G09520	120 min
AT1G53830	120 min
AT1G80240	120 min
AT2G39870	120 min
AT3G05490	120 min
AT3G47340	120 min
AT3G55840	120 min
AT4G25260	120 min
AT5G54490	120 min
AT2G40000	120 min
AT1G21400	120 min
AT1G21830	120 min
AT2G41110	120 min
AT2G43060	120 min
AT3G59900	120 min
AT3G62720	120 min
AT4G23060	120 min
AT5G23350	120 min
AT5G23360	120 min
AT5G66200	120 min
AT1G36060	120 min
AT2G41380	120 min
AT2G42380	120 min
AT3G06150	120 min
AT3G58120	120 min
AT4G01870	120 min
AT5G17490	120 min
AT5G18440	120 min
AT5G25190	120 min
AT5G64220	120 min
AT1G04310	120 min
AT1G11545	120 min
AT2G22810	120 min
AT2G47440	120 min
AT3G45970	120 min
AT4G19120	120 min
AT4G25420	120 min
AT4G26540	120 min
AT4G29310	120 min
AT5G23870	120 min
AT5G48150	120 min
AT5G56220	120 min
AT5G66460	120 min
AT5G66920	120 min
AT1G64660	120 min
AT1G64670	120 min
AT1G68620	120 min
AT1G70920	120 min
AT2G01190	120 min
AT2G01200	120 min
AT2G25460	120 min
AT2G34650	120 min
AT2G40540	120 min
AT3G13380	120 min
AT3G45730	120 min
AT4G10020	120 min
AT4G12410	120 min
AT4G36010	120 min
AT4G39390	120 min
AT5G04310	120 min
AT5G57790	120 min
AT1G25540	120 min
AT1G74670	120 min
AT1G75590	120 min
AT1G79700	120 min
AT2G40620	120 min
AT2G47130	120 min
AT3G26760	120 min
AT3G50890	120 min
AT3G58850	120 min
AT4G00850	120 min
AT5G42050	120 min
AT5G63810	120 min
