# Supplementary material for: Cell elongation is regulated through a central circuit of interacting transcription factors in the Arabidopsis hypocotyl
Source: eLife. 2014 May 27;3:e03031. doi: 10.7554/eLife.03031 (PMC4075450; doi:10.7554/eLife.03031)
Supplement: Figure 3—source data 1. — Seedlings were grown on 2 µM propiconazole medium for 5 days in the dark and treated with mock or 100 nM brassinolide (BL) for 4 hr. BR-regulated genes were defined by 1.5-fold difference between wild type (+BL) and wild type (−BL) with p-value<0.01. DOI: http://dx.doi.org/10.7554/eLife.03031.012 [file elife03031s003.xlsx]

## Sheet: Sheet1
Figure 3-source data 1. BR-regulated genes in wild type and their BR-responsive expression in the iaa3 mutant. Seedlings were grown on 2 µM propiconazole medium for 5 days in the dark and treated with mock or 100 nM brassinolide (BL) for 4 hr. BR-regulated genes were defined by 1.5-fold difference between wild type (+ BL) and wild type (-BL) with p-value< 0.01.
Gene	Fold change (wild type +BL / wild type -BL)	p-value	Fold change (iaa3 +BL / iaa3 -BL)	p-value
AT1G01070	1.52244	0.00132311	1.01141	1
AT1G01120	1.85363	1.4663e-09	0.985136	0.974366
AT1G01130	1.91403	0.00384993	0.966378	0.952747
AT1G01200	3.3206	2.05599e-06	0.5864	0.182075
AT1G01480	0.654631	0.00920387	0.942511	0.702525
AT1G01500	0.648187	0.00104287	0.652627	0.00205414
AT1G01600	7.67366	4.94268e-18	1.64689	0.0204012
AT1G01620	4.93037	4.66468e-86	1.30586	0.000744326
AT1G01630	1.6055	5.61357e-09	0.966513	0.748329
AT1G01900	2.94525	1.30445e-06	1.53638	0.0854638
AT1G02070	0.146594	0.00101636	0	0.350401
AT1G02400	3.10154	6.95112e-31	1.29839	0.00553264
AT1G02470	0.474139	0.000107393	0.441834	5.32143e-05
AT1G02610	1.54284	1.06635e-06	1.09278	0.311265
AT1G02640	2.20137	1.10813e-35	0.867229	0.0245725
AT1G02650	10.612	1.00208e-29	1.72972	0.0230476
AT1G02660	4.21595	5.47652e-48	0.785401	0.0141344
AT1G02670	3.8333	4.27227e-12	0.617964	0.0118436
AT1G02710	0.431464	0.00822476	0.524941	0.11104
AT1G02810	2.00012	7.88993e-14	1.27584	0.00926539
AT1G02850	0.65803	1.42265e-09	0.669891	8.13693e-09
AT1G02900	0.653254	2.86421e-07	0.993623	0.916279
AT1G02920	0.645197	2.3738e-07	0.835871	0.0337454
AT1G03090	1.56898	7.0164e-14	1.20754	0.00176087
AT1G03100	1.63225	0.00916035	1.17882	0.393248
AT1G03220	0.544333	6.42516e-05	1.01427	0.886304
AT1G03445	6.85481	0.0034082	2.36527	0.298863
AT1G03457	1.64152	3.05298e-08	1.73383	2.95438e-09
AT1G03590	1.83793	3.03153e-16	1.50388	3.711e-08
AT1G03870	5.17496	3.91818e-139	1.18026	0.0111284
AT1G03920	0.21887	7.16961e-15	0.718301	0.123212
AT1G03930	1.83588	4.64861e-14	0.930511	0.391195
AT1G04000	1.66376	9.80653e-05	0.768235	0.0689611
AT1G04160	1.8127	1.76098e-08	1.22215	0.052535
AT1G04240	2.78118	8.44438e-44	0.983021	0.903438
AT1G04250	1.91727	1.67117e-21	1.29246	0.00172198
AT1G04540	0.432782	0.000248605	1.08085	0.787166
AT1G04610	4.98487	6.01809e-08	5.86432	5.26778e-08
AT1G04660	61.7719	5.36619e-14	0.644694	1
AT1G04680	2.72145	1.06036e-29	1.9542	2.86348e-14
AT1G04770	0.557582	2.08095e-06	1.08204	0.462337
AT1G04820	1.66587	8.23897e-17	1.16995	0.00955454
AT1G05010	0.550566	2.10219e-22	0.690624	1.20095e-09
AT1G05100	7.75634	1.74245e-07	0.940238	0.972794
AT1G05170	1.84879	5.57428e-08	1.3216	0.0247534
AT1G05330	7.92848	0.0072757	1.00318	1
AT1G05420	10.6463	3.60228e-13	1.78599	0.203132
AT1G05630	1.66571	3.55677e-05	1.39518	0.0147506
AT1G05660	13.9479	5.94403e-09	13.5632	5.94435e-06
AT1G05710	0.621905	0.000260757	0.678857	0.00311532
AT1G05835	0.308121	4.94522e-33	0.248331	6.91626e-16
AT1G06050	1.58431	0.000212137	1.02882	0.830325
AT1G06090	1.56508	0.000796006	1.74953	1.42732e-06
AT1G06180	0.408172	0.000404496	0.311498	3.75421e-06
AT1G06475	4.06644	1.73189e-05	2.44815	0.0190373
AT1G06520	2.50682	3.95044e-17	1.80384	6.04093e-09
AT1G06710	0.626721	0.00086118	0.963979	0.772593
AT1G06850	1.61748	1.4005e-07	1.3874	0.000670193
AT1G06930	5.1024	1.16908e-08	0.858388	0.731285
AT1G06980	1.58599	9.4775e-06	1.19714	0.115103
AT1G07090	0.593101	1.52663e-07	0.832295	0.0781162
AT1G07340	Inf	0.00129047	NA	NA
AT1G07370	1.7461	0.00706015	1.17373	0.567916
AT1G07400	0.403692	7.97793e-05	21.1436	1.41456e-47
AT1G07440	0.522391	1.27016e-12	0.64534	1.31867e-06
AT1G07570	1.52514	2.33428e-09	1.38774	2.66644e-06
AT1G07720	2.55638	7.13288e-10	1.64704	0.000696254
AT1G07890	0.627756	2.76788e-14	0.962334	0.558782
AT1G07985	0.361689	2.82434e-44	0.274907	9.3218e-67
AT1G08200	1.54419	1.13344e-11	1.17449	0.0104873
AT1G08230	0.448823	4.03819e-21	0.567567	6.89995e-12
AT1G08290	0.312333	0.00238772	0.807085	0.544492
AT1G08340	1.67282	0.00485049	1.12829	0.558001
AT1G08430	0.429449	0.00752187	0.581971	0.165339
AT1G08500	6.10169	5.68813e-64	1.59551	0.0036551
AT1G08570	2.31131	1.26744e-36	1.08921	0.192383
AT1G08590	1.55346	1.29183e-07	1.05162	0.590258
AT1G08630	1.65217	1.37237e-16	0.935643	0.285412
AT1G08650	1.66392	0.000135602	1.71165	0.000170285
AT1G09070	1.81891	3.98729e-11	1.747	5.13335e-10
AT1G09200	1.55286	3.87484e-05	1.27409	0.0386373
AT1G09460	3.75042	3.05203e-81	1.19936	0.0102179
AT1G09480	2.53053	1.31024e-10	1.05869	0.751259
AT1G09540	3.54351	8.74211e-08	2.07645	0.00281677
AT1G09575	1.92155	1.08924e-13	1.32239	0.0025935
AT1G09750	2.43947	8.41552e-11	1.29827	0.0712284
AT1G09812	5.1947	2.12546e-05	1.63658	0.398346
AT1G09890	0.243986	0.000357261	0.365856	0.166075
AT1G09950	2.74872	0.00201701	3.81599	5.36028e-05
AT1G09970	0.622267	4.29481e-06	0.787377	0.0252866
AT1G10060	1.5796	6.46297e-09	0.724944	4.65435e-06
AT1G10070	1.70938	7.39157e-19	1.03086	0.623748
AT1G10150	1.8006	4.36795e-14	1.28215	0.00117601
AT1G10200	1.65248	1.45855e-14	1.40746	3.25797e-07
AT1G10340	4.51745	1.09522e-05	2.42277	0.00630515
AT1G10360	1.7646	0.000131346	1.46305	0.030197
AT1G10380	0.501643	1.66993e-10	0.73303	0.00684797
AT1G10550	1.69085	2.36536e-10	0.894034	0.176393
AT1G10560	1.72319	0.000927534	1.193	0.266356
AT1G10585	0.230014	0.00738722	0.189495	0.000297883
AT1G10682	0.53885	3.94102e-20	0.525688	2.64195e-20
AT1G10740	2.58247	1.28819e-42	0.897015	0.128432
AT1G10970	0.663384	0.00754941	1.12482	0.459496
AT1G11120	3.76568	5.89259e-23	0.796012	0.386943
AT1G11190	0.568112	0.0016822	0.721294	0.0665092
AT1G11210	0.541155	2.86924e-05	0.637163	0.00236094
AT1G11260	3.20569	6.70089e-80	1.26563	7.35207e-05
AT1G11330	0.506299	1.34671e-08	1.05455	0.592776
AT1G11350	0.555722	1.66286e-09	0.794536	0.0126626
AT1G11380	1.92945	5.16226e-18	0.954351	0.54429
AT1G11410	1.98613	1.00904e-05	0.83576	0.434154
AT1G11440	1.62385	4.57152e-05	0.774435	0.0538447
AT1G11450	0.31351	5.30123e-12	0.751512	0.061102
AT1G11545	1.88378	1.98328e-19	0.950268	0.491354
AT1G11580	0.513985	0.00100627	1.34864	0.124665
AT1G11740	4.16382	6.39665e-44	0.677403	0.000757684
AT1G11925	0.533981	2.41592e-05	0.850108	0.15617
AT1G11960	3.08276	3.91621e-18	1.65924	8.30117e-05
AT1G12070	3.96728	9.50747e-20	1.13879	0.504081
AT1G12080	3.66418	8.86389e-98	1.38871	8.52196e-08
AT1G12090	2.86233	5.39866e-23	1.41306	0.00182378
AT1G12240	2.96123	2.92319e-30	1.05525	0.541539
AT1G12450	1.50272	3.83572e-05	0.941429	0.538263
AT1G12500	3.2018	7.15097e-27	1.1363	0.239901
AT1G12580	1.5402	3.52102e-10	1.18269	0.0188753
AT1G12780	1.769	9.4153e-15	1.55389	3.6211e-09
AT1G12900	1.51839	4.80503e-11	0.912046	0.127722
AT1G12950	0.398466	2.74327e-10	0.716136	0.011871
AT1G12990	1.79675	1.90334e-11	1.11348	0.270225
AT1G13150	0.557401	0.000199281	0.802635	0.184028
AT1G13430	0.216797	1.43879e-19	0.619631	0.0100688
AT1G13520	0.521543	0.0060394	0.974675	0.902163
AT1G13670	1.89452	2.10568e-11	0.686118	0.000740294
AT1G13710	0.443034	3.28435e-17	0.795501	0.0336226
AT1G13930	2.01653	1.58633e-09	1.26568	0.0515834
AT1G14150	1.77259	5.26509e-05	0.838252	0.199563
AT1G14260	0.484144	0.00335189	1.17958	0.385888
AT1G14290	3.54599	8.89828e-36	1.84036	3.43767e-09
AT1G14390	2.50602	1.69002e-08	1.227	0.405032
AT1G14480	2.33304	0.000125224	1.58777	0.0270102
AT1G14520	3.39344	4.53407e-13	1.05132	0.784245
AT1G14550	0.590699	0.00979634	0.959914	0.888175
AT1G14860	0.551644	4.13004e-17	0.482212	3.62648e-25
AT1G14970	0.362047	6.13867e-11	0.374495	9.67003e-09
AT1G15010	2.81493	8.08932e-26	1.95952	1.52666e-15
AT1G15040	2.45487	3.26809e-39	1.01947	0.744784
AT1G15050	3.05473	3.10401e-07	1.10716	0.69077
AT1G15210	2.27857	1.05615e-07	1.20005	0.252465
AT1G15215	0.654662	0.00327988	0.904587	0.49924
AT1G15330	2.48809	3.4847e-23	1.24702	0.0260729
AT1G15380	2.35971	6.64374e-41	1.05457	0.406477
AT1G15400	1.87736	2.07576e-20	1.1461	0.05215
AT1G15410	1.51306	1.21785e-06	0.902233	0.266117
AT1G15550	1.56927	0.00110812	0.902036	0.559326
AT1G15580	14.2554	0.003956	Inf	0.920781
AT1G16130	1.57119	0.00549506	1.65848	0.0011937
AT1G16150	1.82663	0.00391691	1.61138	0.00476072
AT1G16300	0.520313	4.98421e-10	0.773329	0.0099097
AT1G16370	1.85487	4.33126e-11	0.943024	0.582974
AT1G16390	1.86594	3.80323e-18	0.960198	0.57079
AT1G16750	0.31133	1.23244e-20	0.675361	0.000707576
AT1G16850	2.44161	9.73915e-08	3.57914	9.18019e-12
AT1G17060	1.75906	7.70047e-15	1.3252	0.000148911
AT1G17170	0.634006	6.56416e-05	0.775389	0.0312995
AT1G17230	0.60873	1.88988e-08	0.618387	2.17519e-08
AT1G17300	3.83787	2.63167e-15	1.70751	0.00151886
AT1G17345	0.52122	1.83083e-06	0.306038	1.06106e-17
AT1G17620	4.29039	2.47498e-84	1.11815	0.121414
AT1G17700	1.70022	3.20169e-05	0.843395	0.229433
AT1G17710	6.56828	0.00132423	1.59061	0.361965
AT1G17745	0.489335	1.72301e-06	0.58916	0.000635032
AT1G17810	0.646719	7.30267e-10	0.610982	1.80865e-12
AT1G17870	1.5805	0.00459252	6.70753	1.27523e-37
AT1G17980	1.52884	4.5349e-09	0.978156	0.786962
AT1G18030	2.1155	3.9509e-20	0.888598	0.166621
AT1G18140	0.351779	6.83619e-18	0.749672	0.00775375
AT1G18270	1.7454	7.2124e-19	1.0623	0.327843
AT1G18280	4.64024	1.85402e-43	1.21366	0.110633
AT1G18360	1.63631	1.71268e-05	1.21179	0.104644
AT1G18400	2.17661	2.51206e-24	1.80574	6.77389e-13
AT1G18590	0.63311	0.000168388	0.865237	0.242958
AT1G18610	1.96884	2.66433e-09	1.08314	0.549118
AT1G18970	0.221041	0.00175345	0.278839	0.00261008
AT1G18980	0.591529	0.00934134	0.642424	0.0297208
AT1G19380	1.58308	9.90746e-07	1.39172	0.000227718
AT1G19440	1.6995	4.2162e-08	0.793777	0.0424267
AT1G19450	1.64765	2.9257e-09	1.13637	0.15441
AT1G19510	2.0083	4.57284e-08	0.969262	0.833451
AT1G19540	2.73138	2.24444e-54	1.58996	4.98157e-13
AT1G19550	3.2111	4.79947e-12	1.47092	0.0260179
AT1G19770	1.61319	0.00230453	1.27061	0.111284
AT1G19835	1.72651	5.71773e-13	1.24712	0.00465429
AT1G19940	5.45084	1.08342e-08	0.945412	0.949938
AT1G19970	1.56243	0.00916071	1.16446	0.412903
AT1G20010	1.73306	8.13966e-16	1.13279	0.0861162
AT1G20020	1.9721	2.08806e-06	1.08484	0.586402
AT1G20030	2.06871	8.44957e-06	0.73811	0.0587525
AT1G20070	3.69413	2.87652e-27	1.3175	0.0756859
AT1G20090	1.52249	2.79538e-10	0.965424	0.597948
AT1G20160	0.333847	1.31969e-32	0.254602	3.33548e-36
AT1G20300	0.637334	0.00166551	1.31899	0.0378266
AT1G20440	2.37227	3.34537e-45	1.63494	5.46929e-16
AT1G20450	4.5493	2.28057e-38	6.46255	2.52219e-53
AT1G20550	1.63191	0.00136361	1.19404	0.297201
AT1G20620	0.589086	7.86795e-19	0.994986	0.859221
AT1G20650	1.60493	1.3347e-09	1.39542	4.27145e-05
AT1G20840	1.62252	6.63174e-13	1.11303	0.114494
AT1G21050	0.28694	6.10068e-17	0.402119	5.44471e-10
AT1G21080	1.75268	8.63243e-16	1.23593	0.00201503
AT1G21100	1.60849	5.59281e-07	1.28929	0.00630385
AT1G21360	1.82756	2.09646e-16	0.922757	0.2846
AT1G21400	1.59905	8.785e-15	0.887819	0.0467631
AT1G21460	0.581248	7.03369e-05	0.772559	0.0533425
AT1G21500	1.57311	0.000568401	0.699416	0.00807293
AT1G21670	1.91868	1.44909e-18	1.15786	0.04015
AT1G21830	1.6656	6.74255e-12	1.19699	0.015443
AT1G21880	2.03792	1.51689e-14	1.01239	0.874257
AT1G21920	1.68046	2.0356e-15	1.31434	4.66217e-05
AT1G22110	3.53266	2.13351e-15	1.57269	0.014789
AT1G22160	0.254662	0.000181359	0.735325	0.598603
AT1G22220	0.186028	4.41786e-05	4.75542	4.25667e-07
AT1G22330	2.94057	1.02057e-19	0.973242	0.819805
AT1G22360	0.596855	8.1524e-14	0.520217	8.25731e-21
AT1G22400	0.604595	3.62967e-06	0.808833	0.0341714
AT1G22410	0.612905	3.2721e-11	0.763544	0.000218282
AT1G22460	2.97476	0.000214152	1.06257	0.930618
AT1G22470	5.91643	1.00361e-20	1.66415	0.0115198
AT1G22530	2.86635	5.85716e-40	1.21675	0.0124312
AT1G22540	1.69763	1.27728e-06	1.12337	0.278923
AT1G22550	1.52939	5.53862e-07	1.06521	0.462822
AT1G22630	1.60081	0.000368255	0.756645	0.0840581
AT1G22740	2.27206	1.97684e-28	0.911746	0.2298
AT1G22890	1.69676	0.000124124	1.43513	0.00613776
AT1G22910	2.09119	4.74448e-22	1.15663	0.0810323
AT1G22990	1.74774	0.00390996	1.05067	0.878145
AT1G23030	2.12543	8.66504e-22	0.962222	0.597613
AT1G23390	1.68142	1.91959e-14	1.12415	0.090208
AT1G23710	1.57466	1.42405e-08	2.13124	3.55896e-21
AT1G23760	5.43643	4.04832e-28	1.20218	0.333944
AT1G24120	1.74491	2.67878e-11	1.23757	0.015285
AT1G24170	1.7806	8.62334e-16	1.05556	0.446523
AT1G24265	0.604487	0.00853044	0.802259	0.318571
AT1G24280	0.626405	0.000607414	0.75908	0.0459196
AT1G24440	2.01976	3.67616e-15	1.13829	0.170389
AT1G24575	0.54107	0.00960588	0.751039	0.198138
AT1G25230	1.76956	1.02127e-19	0.894933	0.0718303
AT1G25400	5.14453	5.7164e-34	1.27837	0.0454468
AT1G25480	0.631836	2.35022e-05	0.902405	0.339699
AT1G25530	0.482765	4.31928e-09	0.463604	1.10453e-09
AT1G26150	0.423552	1.79183e-15	0.742442	0.00463758
AT1G26208	0.351573	8.31231e-05	0.698804	0.172963
AT1G26210	0.39524	0.00180997	0.558205	0.0339994
AT1G26240	0.127808	0.0016551	0.519197	0.195731
AT1G26260	0.544689	2.71475e-06	0.953821	0.71129
AT1G26270	0.656746	0.00585282	1.29184	0.079633
AT1G26290	0.564607	0.00808791	0.934717	0.79954
AT1G26770	3.38764	5.56659e-24	5.48702	2.29601e-38
AT1G26890	3.70596	0.000124686	1.10566	0.939052
AT1G26945	4.08931	3.78805e-44	1.30635	0.17743
AT1G26960	3.18881	8.43116e-21	1.83988	0.0001069
AT1G27100	1.68331	2.41786e-14	1.06745	0.326922
AT1G27210	1.50933	4.57573e-09	1.62354	2.52732e-11
AT1G27410	0.649931	0.000407534	1.01439	0.95691
AT1G27440	0.655913	0.00105059	1.01689	0.934587
AT1G27460	2.04543	1.52712e-15	1.01619	0.92005
AT1G27470	0.639122	1.77271e-07	1.12208	0.170546
AT1G27500	1.64497	6.65552e-07	1.29721	0.0111601
AT1G27670	0.561621	6.10641e-17	0.725476	3.51366e-06
AT1G27700	1.52645	0.00220304	0.956575	0.735248
AT1G27950	2.82196	3.43354e-23	1.18977	0.0724352
AT1G28130	1.91625	4.39443e-15	1.08136	0.38051
AT1G28260	1.83752	4.50117e-17	1.13734	0.0607161
AT1G28360	0.0754459	4.36166e-21	0.287565	2.25511e-11
AT1G28390	0.664076	0.00222877	0.895347	0.411378
AT1G28660	0.446571	1.58592e-21	0.669083	1.03956e-06
AT1G28670	0.65262	4.5156e-05	0.826105	0.0598236
AT1G28710	0.643152	0.002885	0.72366	0.0435279
AT1G28760	0.623073	0.0011292	3.39187	7.70703e-21
AT1G28815	0.48138	0.00198076	1.13766	0.57967
AT1G28960	0.601114	3.18923e-11	0.647999	2.73566e-08
AT1G29020	2.23224	1.10436e-08	1.23327	0.154898
AT1G29320	0.65575	0.000224671	1.23436	0.062816
AT1G29420	11.2418	0.000326642	NA	NA
AT1G29430	7.89315	1.51245e-23	2.36498	0.873609
AT1G29440	10.8398	1.70604e-38	NA	NA
AT1G29450	7.26421	7.40183e-34	2.36498	0.872943
AT1G29460	7.71492	3.01023e-26	1.28939	1
AT1G29465	2.48508	2.25818e-10	0.918311	0.741064
AT1G29490	16.657	3.5408e-32	Inf	0.914933
AT1G29500	7.01175	4.54861e-31	1.11924	0.817001
AT1G29510	4.05052	7.87121e-18	0.991317	1
AT1G29660	4.52916	1.40301e-27	1.84999	0.00140116
AT1G29670	2.54063	2.08844e-11	2.19681	1.04337e-08
AT1G29830	0.389304	0.00806035	0.773937	0.444683
AT1G29920	2.27003	0.00343838	0.833568	0.516841
AT1G29950	0.503776	0.00590217	0.980871	1
AT1G30040	1.7927	0.00249115	1.60396	0.00980234
AT1G30070	0.645936	0.000208682	2.69356	2.87083e-19
AT1G30080	5.18115	2.45591e-06	0.77586	0.737588
AT1G30110	0.494284	4.25261e-14	0.44465	5.55796e-19
AT1G30280	5.15098	1.3326e-14	2.2658	0.000812575
AT1G30330	0.514383	2.49346e-24	0.657049	1.51411e-10
AT1G30360	1.87139	4.45453e-15	1.60702	2.34917e-09
AT1G30410	0.398075	4.54664e-26	0.6881	8.21001e-06
AT1G30520	1.68698	0.00646006	0.677716	0.0415168
AT1G30530	0.542072	0.000248106	0.737509	0.0843531
AT1G30690	9.26778	1.82409e-38	1.9701	4.59157e-05
AT1G30700	0.619156	6.08589e-11	0.92553	0.273148
AT1G30750	0.395034	1.0737e-14	0.774529	0.0394209
AT1G30820	3.48925	8.47068e-73	1.23618	0.00138634
AT1G30840	1.71875	0.0028255	0.994271	0.970222
AT1G31173	0.480323	0.00230972	0.330455	3.27466e-05
AT1G31310	0.292726	2.48846e-21	0.602811	0.000476201
AT1G31580	0.0432729	4.23958e-13	3.05136	2.68071e-07
AT1G31660	0.625192	2.05505e-06	1.00763	0.953203
AT1G31710	0.579869	7.80012e-07	1.07092	0.51926
AT1G31770	0.460594	4.73841e-19	0.698017	5.70708e-05
AT1G31880	1.65811	0.0012413	0.994394	1
AT1G31950	1.71323	4.0723e-07	1.74883	6.64793e-06
AT1G32100	0.648306	0.00055749	0.709157	0.00767602
AT1G32170	2.26165	3.43537e-37	0.966457	0.589273
AT1G32190	0.219203	6.03546e-25	0.28514	9.25166e-14
AT1G32240	0.630313	0.000729439	0.869353	0.385054
AT1G32460	1.85846	3.41997e-22	0.981944	0.812138
AT1G32510	10.4104	0.000280724	0.732431	1
AT1G32560	1.89552	3.60583e-05	1.79533	0.0113875
AT1G32690	0.276323	1.39403e-12	0.424278	1.1869e-06
AT1G32910	5.36421	0.00316126	2.1349	0.0184826
AT1G32920	2.55335	2.19882e-11	1.98363	6.47825e-07
AT1G32928	2.748	2.66822e-14	1.8055	2.50835e-06
AT1G33055	0.413117	0.00729861	1.86239	0.0474414
AT1G33110	0.544359	0.000193326	0.646903	0.00728455
AT1G33240	1.76839	3.96879e-08	1.67096	1.32e-06
AT1G33390	0.657889	2.80758e-05	0.921588	0.438771
AT1G33440	0.588617	4.62796e-08	0.771494	0.0140328
AT1G33760	11.163	1.31606e-08	1.33575	0.28404
AT1G33800	1.64645	2.41665e-08	1.03366	0.711498
AT1G34460	0.58678	0.00102917	1.16126	0.361171
AT1G35140	3.21215	1.035e-60	1.84357	2.18836e-20
AT1G35180	1.89283	0.000209301	1.72731	0.00347257
AT1G35260	1.85502	2.47216e-07	1.30182	0.0806069
AT1G35460	1.6115	5.96736e-06	0.805099	0.0643737
AT1G35580	2.14447	2.50243e-35	1.00106	0.953957
AT1G35720	0.50302	5.57376e-26	0.847885	0.0145683
AT1G35830	0.585241	0.00448647	0.593675	0.0130758
AT1G36060	0.321904	9.68584e-24	0.679431	0.000344528
AT1G36940	0.448224	7.60564e-08	0.225918	3.82056e-15
AT1G37130	0.586443	6.24228e-18	1.33691	1.75979e-06
AT1G41830	1.88021	8.72733e-19	1.19692	0.0181357
AT1G42470	1.61921	0.000261992	1.68475	8.68482e-05
AT1G43010	0.094438	0.00484339	0.731495	0.936076
AT1G43020	0.395446	1.8618e-07	0.612703	0.0126032
AT1G43040	6.98166	0.00642516	1.51611	0.687254
AT1G43670	1.72386	5.11417e-18	1.08699	0.173403
AT1G43675	2.32639	6.24099e-14	0.868909	0.164055
AT1G43800	0.51033	0.00861519	3.91721	2.19192e-08
AT1G44000	1.50279	2.51578e-05	0.890094	0.246878
AT1G44170	0.661092	2.23061e-08	0.641632	3.25697e-09
AT1G44350	1.89302	2.91161e-14	1.63647	1.94255e-08
AT1G44542	0.397238	0.00026138	0.790328	0.215613
AT1G44608	3.6053	1.34236e-22	0.886017	0.360796
AT1G44970	0.321105	1.73688e-16	0.732959	0.0381606
AT1G45010	2.24737	0.00438839	1.92549	0.0157618
AT1G45229	0.608652	0.00220478	0.936626	0.690381
AT1G45688	1.74623	9.44513e-17	1.13981	0.0482289
AT1G46264	0.515224	0.00487723	0.786269	0.329711
AT1G46480	0.265584	0.00024399	0.245935	0.0124313
AT1G46554	0.599611	2.85889e-06	0.352143	8.01896e-19
AT1G47380	1.78279	1.39661e-11	1.26387	0.00492137
AT1G47520	1.52912	7.53333e-06	0.996605	0.998035
AT1G47565	0.597948	7.45389e-05	1.05864	0.698717
AT1G47580	1.52949	9.99745e-05	0.915156	0.474535
AT1G47610	0.122349	0.000750587	1.62847	0.634966
AT1G47740	2.26617	5.16204e-31	1.02038	0.813216
AT1G48240	2.83966	5.80111e-36	1.01606	0.887897
AT1G48330	4.98709	4.52309e-22	1.76276	0.0328198
AT1G48420	0.649602	2.04586e-08	0.952587	0.51584
AT1G48480	3.49172	7.1908e-15	1.32811	0.0966573
AT1G48500	0.65406	0.00179821	1.05493	0.722657
AT1G48610	2.10895	1.77964e-11	1.1214	0.35537
AT1G48820	0.0984045	0.00573578	1.27017	0.789377
AT1G49200	1.5386	8.58691e-05	0.714833	0.00403104
AT1G49210	1.5592	0.00534185	0.930754	0.712924
AT1G49240	2.25016	5.43864e-41	1.20046	0.00227218
AT1G49660	0.632599	6.79226e-06	0.722677	0.00124445
AT1G49780	0.443644	3.6597e-08	0.436678	3.90725e-07
AT1G49840	1.62811	9.3823e-06	1.43499	0.0021522
AT1G50110	0.582867	1.16804e-06	0.551385	1.08686e-07
AT1G50630	1.57356	5.2956e-07	1.17188	0.0925959
AT1G50890	2.11854	3.69548e-10	0.841374	0.202765
AT1G51170	0.444879	3.42012e-11	0.335838	2.47469e-12
AT1G51190	0.151611	6.82477e-07	0.168955	8.14584e-06
AT1G51270	1.83262	0.00152758	0.915625	0.586637
AT1G51340	0.275894	1.10734e-12	0.770868	0.115347
AT1G51380	0.506392	0.00971919	0.56844	0.0575241
AT1G51420	0.539141	3.84762e-06	0.501559	3.08858e-08
AT1G51500	1.59691	2.47079e-09	1.45402	1.622e-06
AT1G51680	0.610189	1.20115e-13	0.717909	6.53944e-07
AT1G51760	0.658512	1.46244e-08	0.899661	0.161014
AT1G51840	0.609318	0.000294603	0.730391	0.0189414
AT1G51890	0.487708	0.00279479	0.892248	0.568986
AT1G52070	0.524269	0.00112705	0.702603	0.0736483
AT1G52110	0.496599	0.00560326	0.64669	0.0582624
AT1G52190	0.496654	1.76835e-28	0.473494	1.17184e-31
AT1G52240	8.97732	2.07215e-114	1.45177	0.000326124
AT1G52260	1.71561	1.27035e-08	1.00235	0.933089
AT1G52280	1.63247	3.35282e-06	0.964791	0.772242
AT1G52290	6.53609	6.75503e-17	2.84352	2.76575e-05
AT1G52410	0.478123	3.46721e-05	0.869619	0.466973
AT1G52540	2.26496	1.17508e-19	0.900401	0.262446
AT1G52565	3.03441	2.37961e-05	1.38356	0.240243
AT1G52700	0.459778	0.000618405	0.977535	0.911548
AT1G52720	1.52399	1.8727e-08	1.05097	0.516873
AT1G52750	6.70587	1.24064e-33	2.43369	1.30205e-06
AT1G52827	1.56889	1.32671e-05	0.886623	0.322723
AT1G52830	45.3831	9.82692e-43	NA	NA
AT1G52905	0.631597	0.00182157	0.871804	0.390462
AT1G52910	3.2904	5.45243e-22	1.2601	0.110348
AT1G53035	0.62243	0.000234851	0.683122	0.002367
AT1G53230	0.372891	0.00497676	0.58927	0.115304
AT1G53510	0.544056	9.71598e-19	0.944262	0.41728
AT1G53690	19.9258	1.8404e-30	2.55314	0.018536
AT1G53700	4.31905	2.05677e-05	3.14724	0.00675821
AT1G53720	0.607635	3.08653e-05	1.28296	0.0406671
AT1G53830	3.18641	3.48005e-28	2.04476	3.20583e-08
AT1G53840	1.51561	2.15082e-09	1.62615	2.11453e-12
AT1G54120	6.81105	2.48156e-09	1.64542	0.171951
AT1G54200	0.332574	4.35253e-11	0.401864	7.17226e-05
AT1G54575	0.299873	2.26802e-16	0.574663	1.35135e-05
AT1G54740	3.05383	3.01616e-45	0.989206	0.902684
AT1G54890	0.464626	2.60968e-07	0.581884	0.000147061
AT1G55020	0.544114	5.50846e-12	0.414823	1.44954e-23
AT1G55330	7.81424	6.68791e-181	1.26984	0.00219242
AT1G55510	1.57529	1.92347e-12	0.969681	0.650317
AT1G55610	0.370717	4.91663e-10	0.468029	7.03901e-07
AT1G55990	2.1212	0.00989604	2.54338	0.00112084
AT1G56020	0.63168	8.2309e-05	0.542809	7.2224e-09
AT1G56423	1.99387	2.25701e-10	0.722609	0.0137063
AT1G56430	0.343434	0.00277511	0.413842	0.403862
AT1G56540	2.04218	0.000505585	1.39934	0.0962027
AT1G56600	3.43764	0.0069713	7.49459	0.00311896
AT1G56660	6.25296	3.01431e-154	0.934162	0.386632
AT1G56720	1.76144	1.08011e-13	0.938771	0.4249
AT1G57560	3.7481	0.00238514	1.71269	0.104414
AT1G57765	1.62691	5.88485e-08	1.06296	0.477876
AT1G57980	1.67184	0.000978187	1.05928	0.709273
AT1G57990	2.7686	3.37266e-10	1.15063	0.333845
AT1G58110	1.53979	1.30854e-09	1.1277	0.0941481
AT1G58170	0.307791	0.00124549	0.412613	0.0111585
AT1G58180	1.5609	2.80123e-12	0.808367	0.000662376
AT1G58200	1.71246	3.1696e-14	1.09841	0.184514
AT1G58340	2.69672	5.40165e-11	1.00762	0.962433
AT1G58370	0.52923	1.89693e-06	0.709675	0.0420528
AT1G58520	1.64109	1.83201e-05	0.926681	0.573941
AT1G59660	0.526971	0.000624313	3.70681	8.52475e-13
AT1G59940	0.0392153	1.24685e-22	0.0453667	1.82021e-18
AT1G59960	0.649663	6.14055e-05	0.808603	0.0371078
AT1G60030	4.25466	2.83541e-15	1.79228	0.011323
AT1G60190	2.95304	0.000720569	23.4711	2.79888e-22
AT1G60680	0.53211	3.46458e-10	0.884617	0.218708
AT1G60710	0.548726	3.75031e-20	1.034	0.635223
AT1G60730	0.58068	2.05339e-10	0.762493	0.00128383
AT1G60750	0.330449	0.0005676	2.02908	0.258972
AT1G60850	0.658646	0.000493119	1.02054	0.85691
AT1G60960	0.429069	3.41594e-33	0.611727	2.42773e-12
AT1G61170	3.28583	1.02669e-14	1.49213	0.078508
AT1G61230	0.324717	0.00621964	0.683801	0.300043
AT1G61255	3.20905	5.86382e-17	1.68345	0.000844845
AT1G61260	2.97075	3.49249e-09	2.73456	3.11333e-07
AT1G61340	3.73286	0.000834488	5.18117	2.08701e-05
AT1G61640	0.606258	9.79353e-05	1.26236	0.0439146
AT1G61800	0.4908	4.76401e-06	0.523318	1.44812e-05
AT1G61890	1.69821	1.20004e-06	1.27409	0.0210963
AT1G61900	1.60815	3.80814e-13	1.01308	0.826064
AT1G62180	0.635647	1.38052e-05	0.724557	0.0017085
AT1G62280	0.375973	0.000513815	1.27397	0.670973
AT1G62320	2.24688	0.000346319	1.02008	1
AT1G62380	0.313317	3.63222e-62	0.427686	1.57287e-34
AT1G62420	2.57699	0.00406959	1.44071	0.130136
AT1G62430	2.44256	4.56249e-10	0.653827	0.00809557
AT1G62440	14.267	4.67978e-11	2.05727	0.049811
AT1G62450	Inf	7.14082e-06	NA	NA
AT1G62480	5.03622	6.01347e-147	1.63823	3.56077e-16
AT1G62500	0.264996	6.21768e-16	0.948254	0.802013
AT1G62510	2.80903	7.19159e-48	1.2725	0.000476096
AT1G62610	3.75344	2.52384e-44	0.816424	0.0737607
AT1G62620	5.64274	0.001904	0.920168	1
AT1G62660	1.78672	4.70045e-14	0.781252	0.00149809
AT1G62770	0.583489	3.46999e-17	1.00726	0.973998
AT1G63020	2.51709	1.57124e-07	1.25225	0.213255
AT1G63050	0.372992	1.05705e-11	0.348866	1.27397e-11
AT1G63090	1.55148	0.000791566	1.89704	6.82879e-07
AT1G63100	0.347326	0.00792192	0.667257	0.428931
AT1G63180	1.72361	7.76909e-15	0.96911	0.655836
AT1G63220	1.70956	1.64325e-10	0.979087	0.80581
AT1G63300	3.9105	5.46225e-16	1.35124	0.120982
AT1G63500	1.58545	1.57248e-11	0.944683	0.474765
AT1G63530	0.469023	0.000271308	7.21813	1.81116e-17
AT1G63720	0.170601	5.41999e-31	0.284553	4.64386e-20
AT1G63730	0.58795	0.00330792	0.880765	0.459125
AT1G63810	0.649443	8.39978e-06	1.31343	0.00389395
AT1G63940	0.518249	2.33268e-22	0.797952	0.000814607
AT1G64080	0.465815	5.11046e-07	1.10525	0.519637
AT1G64160	0.65213	1.12688e-05	0.651826	2.04869e-06
AT1G64330	1.79307	4.93098e-09	1.03475	0.72192
AT1G64380	1.7016	1.94371e-06	2.38126	2.81577e-11
AT1G64440	1.95367	9.6054e-14	0.996953	0.98205
AT1G64640	2.36169	1.07644e-25	1.7056	1.3416e-07
AT1G64670	1.69547	6.4155e-05	1.16432	0.26399
AT1G64690	2.01192	0.000161512	1.00036	0.9705
AT1G64700	1.60668	0.00286882	2.45659	8.36558e-08
AT1G64760	2.15963	4.58851e-12	1.52353	0.000133829
AT1G64900	0.376208	0.00097342	0.770914	0.46367
AT1G64950	0.549322	2.99533e-13	0.466973	6.95806e-19
AT1G64980	1.66699	2.9208e-05	1.2558	0.0508428
AT1G65030	0.643049	0.00027317	1.04966	0.720933
AT1G65150	0.628103	0.00712003	0.980072	0.897638
AT1G65230	1.72985	7.64578e-07	1.04508	0.740318
AT1G65295	1.56884	5.65052e-05	1.34517	0.0110989
AT1G65310	7.82519	3.19999e-143	0.656517	1.96814e-07
AT1G65330	46.3984	2.88718e-05	0	1
AT1G65730	0.575681	4.3586e-07	0.726499	0.00250358
AT1G66080	0.635046	0.00464355	2.47427	3.89658e-11
AT1G66150	1.9134	4.90956e-24	0.935541	0.309351
AT1G66160	2.28359	2.35498e-24	1.27118	0.001433
AT1G66190	1.9013	1.74124e-05	1.2638	0.153984
AT1G66230	1.55503	0.00308484	0.647652	0.00500205
AT1G66350	1.5264	0.000447489	0.946218	0.74079
AT1G66400	2.33592	6.47932e-09	1.2872	0.0814922
AT1G66470	0.50956	0.000200238	0.561916	0.000377122
AT1G66500	1.6145	0.000110651	2.50431	1.08529e-15
AT1G66700	0.272749	1.56512e-06	0.440694	1.48198e-05
AT1G66940	2.13853	5.85541e-08	1.1387	0.619607
AT1G66980	0.57123	8.77671e-06	0.811846	0.152352
AT1G67030	0.51346	2.89845e-06	0.640074	0.010761
AT1G67070	1.94573	9.92393e-19	1.02835	0.693258
AT1G67100	0.599278	0.000450748	0.797495	0.124497
AT1G67110	0.305249	1.03181e-06	0.917392	0.687554
AT1G67265	1.5358	5.27798e-08	0.805852	0.0114573
AT1G67480	1.96472	3.71718e-28	1.03736	0.547102
AT1G67590	1.63809	1.94007e-08	1.27058	0.0116012
AT1G67750	1.80107	1.34008e-07	4.3596	2.15439e-15
AT1G67860	1.79535	0.00184778	0.620275	0.0359979
AT1G67880	1.95515	7.05834e-10	1.32776	0.0156517
AT1G67910	0.66304	1.25357e-10	0.940447	0.327224
AT1G68010	1.50742	1.93594e-10	1.04105	0.553257
AT1G68330	2.91117	4.11425e-16	1.33601	0.0521091
AT1G68410	2.35239	3.4562e-25	1.22745	0.00912964
AT1G68440	3.03054	6.29601e-59	0.980705	0.780083
AT1G68500	2.49515	9.29375e-13	1.89267	6.09936e-07
AT1G69150	0.313421	0.000659117	0.972533	0.928762
AT1G69410	0.256546	2.75297e-41	0.589006	5.41706e-08
AT1G69430	2.69883	0.000113874	0.920053	0.831277
AT1G69490	2.25659	1.93897e-15	0.785972	0.0188314
AT1G69530	3.00758	1.74238e-27	1.61279	1.26611e-05
AT1G69570	1.82153	0.00089183	0.754534	0.367367
AT1G69600	1.55101	0.000139917	1.08248	0.537996
AT1G69680	0.593897	0.000248794	1.88311	3.89042e-06
AT1G69690	1.70697	3.77564e-07	0.787373	0.027083
AT1G69840	2.13894	0.00296058	1.58031	0.060966
AT1G69870	0.518886	5.33515e-05	0.390827	4.12187e-09
AT1G69910	0.648439	6.23606e-06	0.742808	0.00195873
AT1G70090	0.607391	2.77626e-12	0.809032	0.00181332
AT1G70230	1.60344	6.81946e-06	0.787415	0.0316207
AT1G70300	0.600233	1.33118e-11	0.562505	1.88768e-14
AT1G70370	2.63746	3.29618e-27	2.31443	8.20302e-20
AT1G70520	1.62111	4.85733e-07	1.77134	1.4821e-09
AT1G70550	0.583723	0.00149675	0.657766	0.0333048
AT1G70700	1.72711	2.79665e-14	1.28622	0.000282791
AT1G70710	1.76379	3.56535e-13	0.739846	0.00010953
AT1G70890	0.578298	8.28624e-08	0.926353	0.723845
AT1G70900	2.6133	1.99089e-11	0.935273	0.722334
AT1G70985	4.89804	9.95568e-06	0.63888	0.861118
AT1G70990	5.18112	1.09733e-37	1.12181	0.485073
AT1G71020	1.56009	1.67634e-09	1.08708	0.270956
AT1G71030	0.325652	1.92749e-50	0.511142	1.13047e-21
AT1G71080	0.654748	3.9059e-09	0.840792	0.0140382
AT1G71140	0.347324	8.40502e-05	0.299709	1.39417e-05
AT1G71697	1.70201	8.20468e-13	1.47442	9.87026e-08
AT1G71740	0.334976	2.30077e-08	0.689596	0.102141
AT1G71850	0.533434	0.00168308	0.941116	0.818272
AT1G71870	0.520831	8.21757e-06	0.532145	0.000125441
AT1G72150	1.68444	3.52766e-18	1.08545	0.169234
AT1G72180	0.207077	1.14098e-88	0.380027	3.03693e-36
AT1G72230	3.35448	5.93214e-16	0.911828	0.865842
AT1G72240	18.1862	1.67714e-23	1.6797	0.0640278
AT1G72490	0.586833	0.000244166	0.500276	2.2988e-05
AT1G72540	0.632612	0.00102999	1.07451	0.648921
AT1G72610	1.89358	1.1909e-06	1.47181	0.00369511
AT1G72620	17.4141	0.000664688	2.36498	0.886571
AT1G72660	0.444673	2.64918e-05	2.05361	3.64126e-06
AT1G72680	0.650177	4.1606e-08	0.720356	2.47106e-05
AT1G72790	3.51383	1.58753e-49	1.09591	0.318205
AT1G72800	0.638615	0.000629185	2.85948	8.14807e-15
AT1G72880	1.68276	6.51646e-12	1.07625	0.326548
AT1G72890	1.63756	0.00200123	0.897965	0.526285
AT1G73010	4.83958	0.000129452	2.4673	0.00461155
AT1G73165	3.928	0.00202669	2.49312	0.132456
AT1G73540	1.7688	5.83909e-07	1.24264	0.0544945
AT1G73630	0.364538	8.39655e-05	0.675081	0.113934
AT1G73640	0.529303	0.00269551	1.18013	0.590806
AT1G73750	1.69413	7.64887e-07	0.828672	0.0728701
AT1G73965	2.57072	1.42325e-05	0.738469	0.183101
AT1G74000	0.648646	0.00692736	0.664788	0.0093805
AT1G74010	0.605801	3.07543e-08	0.689043	2.54149e-05
AT1G74055	2.15183	0.000845259	0.719131	0.302901
AT1G74070	1.8068	3.84304e-07	1.26219	0.0641151
AT1G74150	0.26716	2.39924e-16	0.373346	5.15484e-11
AT1G74370	1.55102	1.19235e-06	0.884166	0.193508
AT1G74380	1.79092	4.83312e-16	1.08536	0.219581
AT1G74420	4.74522	5.99672e-08	0.65412	0.661531
AT1G74500	0.3294	0.000408915	0.21553	0.00331139
AT1G74660	1.65323	1.41405e-05	1.14842	0.288241
AT1G74670	2.72949	6.94071e-31	1.49621	0.000406293
AT1G74875	2.95304	0.00578005	1.09757	0.837677
AT1G74940	0.544381	0.000433816	1.74598	0.00070746
AT1G75030	5.48253	0.00616647	0.608849	0.738777
AT1G75220	2.17125	1.23857e-35	1.15604	0.0188101
AT1G75270	0.657121	1.03594e-05	0.933672	0.492601
AT1G75450	0.376637	5.52319e-21	0.375791	2.048e-20
AT1G75460	1.66214	0.00864079	0.736804	0.123946
AT1G75500	0.242865	5.38159e-89	0.256749	1.68499e-64
AT1G75590	0.388222	0.000413946	0.658612	0.245564
AT1G75680	1.95957	2.43763e-24	1.19928	0.00590282
AT1G75710	0.635974	1.7117e-05	0.998356	1
AT1G75770	0.631598	0.000115939	0.787356	0.0319064
AT1G75780	2.20514	2.09186e-13	1.56176	0.000356079
AT1G75900	16.0712	1.65064e-12	1.37379	0.789804
AT1G76090	3.40468	2.58759e-42	0.819295	0.0280953
AT1G76110	2.06208	9.87862e-05	1.06429	0.806965
AT1G76130	0.628093	0.000168149	1.0502	0.683453
AT1G76160	5.19885	1.57799e-116	1.53344	3.9998e-10
AT1G76180	2.10968	2.21117e-34	1.27185	5.53643e-05
AT1G76220	0.142508	3.65654e-21	0.106182	2.53333e-28
AT1G76230	0.307043	0.00306545	0.320424	0.00527001
AT1G76410	2.03023	3.36282e-21	0.827746	0.00927787
AT1G76420	0.149359	0.000510888	0.36738	0.197512
AT1G76490	1.61421	1.62759e-09	1.00731	0.919406
AT1G76500	0.444394	8.75379e-15	0.430306	1.0542e-14
AT1G76520	0.540705	7.68435e-17	0.718922	3.22829e-06
AT1G76590	1.77568	1.33039e-14	1.25056	0.00182238
AT1G76600	2.96582	4.2617e-30	1.64883	2.62415e-08
AT1G76620	0.115781	1.16035e-25	0.570973	0.0105964
AT1G76650	0.458521	0.00977918	4.79103	3.38881e-08
AT1G76980	0.641005	0.00159726	0.770256	0.0585554
AT1G77020	1.59262	9.51208e-08	1.06563	0.49794
AT1G77120	0.337434	0.000187633	3.68529	3.36006e-06
AT1G77200	0.525237	0.00111911	0.751975	0.165784
AT1G77380	0.624285	1.78783e-12	0.66083	3.00827e-10
AT1G77510	0.600108	3.35427e-12	0.71263	2.10336e-06
AT1G77640	1.84289	1.30644e-07	1.31161	0.0163383
AT1G77680	2.3645	8.30056e-31	1.2632	0.00256123
AT1G77690	0.298748	3.86503e-63	0.402067	6.87886e-36
AT1G77760	0.4619	2.18637e-16	1.06248	0.453785
AT1G77990	2.8667	5.92807e-12	1.95822	5.67874e-06
AT1G78040	2.06287	1.32774e-32	1.22906	0.000720977
AT1G78070	2.86836	1.24337e-07	3.6433	8.4471e-11
AT1G78100	1.76651	8.96215e-13	0.874327	0.0983064
AT1G78120	0.535189	0.000558815	0.920399	0.665648
AT1G78230	15.8945	3.60175e-100	0.910069	0.631484
AT1G78240	1.61242	8.71314e-14	1.49695	2.73056e-10
AT1G78260	3.617	6.47273e-33	1.07587	0.545051
AT1G78290	1.56634	4.05266e-09	1.26108	0.00215217
AT1G78300	1.72605	4.29895e-17	0.980898	0.76919
AT1G78450	3.00572	4.18614e-07	3.27342	1.91616e-07
AT1G78570	0.637648	5.26536e-11	0.958209	0.523744
AT1G78580	0.634013	0.00274972	1.32505	0.0746559
AT1G78660	1.50862	1.66867e-10	1.05432	0.401661
AT1G78700	1.90354	1.83476e-11	1.00517	0.946246
AT1G78720	5.07923	1.01333e-05	0.542475	0.121402
AT1G78970	4.49603	1.53825e-21	0.998485	1
AT1G79110	1.56114	0.0035272	1.18858	0.415919
AT1G79150	0.612028	1.47016e-05	1.01057	0.930465
AT1G79180	0.544177	0.00280536	0.716202	0.0732398
AT1G79340	1.6853	2.30458e-16	1.05139	0.414325
AT1G79410	0.369819	1.24212e-08	0.940085	0.788984
AT1G79470	0.64531	0.00358838	0.918122	0.666271
AT1G79590	1.58393	7.68439e-10	0.877963	0.100378
AT1G79630	0.542763	4.28534e-08	0.484834	1.60292e-10
AT1G79660	1.75243	1.50922e-12	1.09051	0.313487
AT1G79700	1.72144	4.71219e-12	0.662768	2.1597e-07
AT1G79710	0.561873	3.3337e-06	1.01531	0.946904
AT1G79760	4.32412	0.00512565	5.80732	0.0304424
AT1G79840	2.93421	8.60711e-18	1.85684	5.48924e-06
AT1G80050	0.563405	0.000279882	0.592852	0.000666816
AT1G80120	8.00795	9.32992e-42	2.33578	1.26165e-10
AT1G80130	0.42455	1.89273e-05	0.731202	0.0811392
AT1G80270	0.660998	0.000800635	1.11956	0.391277
AT1G80280	3.85334	2.74634e-16	2.06204	0.000363921
AT1G80370	1.65907	0.00468522	1.37637	0.0765732
AT1G80380	2.40853	4.9603e-47	1.23989	0.000357955
AT1G80440	1.60165	3.39415e-14	1.11199	0.0855735
AT1G80530	0.653897	3.4641e-07	0.870939	0.0846687
AT1G80690	2.10676	0.000681755	1.7775	0.0198999
AT1G80740	9.63291	4.70087e-05	6.10545	0.193422
AT1G80760	0.442923	2.20786e-09	0.464968	1.99837e-06
AT1G80820	0.55683	9.22457e-06	0.995086	0.997403
AT1G80840	0.525395	0.000140408	0.675083	0.0205183
AT1G80920	1.61872	2.58466e-15	0.822687	0.00122868
AT2G01200	2.30213	1.23395e-08	0.711811	0.426855
AT2G01260	2.16681	2.52575e-19	0.972978	0.790295
AT2G01300	3.51996	1.60488e-18	1.61993	0.000239038
AT2G01340	1.55016	1.8075e-05	1.24699	0.0242657
AT2G01420	0.643497	1.84519e-11	0.620467	5.87554e-13
AT2G01520	3.25891	0.00579652	1.886	0.309158
AT2G01590	2.36897	0.000189289	1.35374	0.288021
AT2G01770	15.4442	2.18688e-10	NA	NA
AT2G01830	1.6087	8.62069e-08	1.00668	0.913973
AT2G01900	0.611952	9.33121e-05	0.735922	0.0225139
AT2G01918	1.972	0.000244467	0.915552	0.601884
AT2G02020	0.308688	7.12995e-07	0.87322	0.48102
AT2G02170	0.551202	1.28944e-17	0.784809	0.000405272
AT2G02180	1.84635	5.17069e-14	1.1316	0.107923
AT2G02390	0.639389	2.67972e-10	0.732561	5.94663e-06
AT2G02630	2.8864	1.19395e-13	1.96614	4.89854e-06
AT2G02640	36.2175	7.63802e-05	0.793054	0.893449
AT2G02680	1.65312	0.000323482	1.27048	0.0967363
AT2G02700	4.76923	4.25665e-07	1.98194	0.0540802
AT2G02800	1.76276	2.67907e-14	1.4487	3.8497e-07
AT2G02930	0.657335	3.19389e-06	0.784713	0.00277847
AT2G02955	0.610073	0.000185838	1.00087	0.993238
AT2G03240	2.55589	4.04857e-12	1.22073	0.11378
AT2G03350	1.57005	6.25765e-08	1.14141	0.138637
AT2G03500	0.493755	0.000117322	0.746851	0.124036
AT2G03505	0.356906	0.00937769	1.08038	0.886706
AT2G03730	1.58607	4.29992e-11	1.50163	1.0391e-08
AT2G03760	0.502168	4.99281e-08	1.7389	4.31323e-06
AT2G04100	0.631417	0.00326048	0.457895	3.39723e-06
AT2G04160	0.635421	3.12554e-08	0.597225	2.20127e-09
AT2G04170	0.449651	4.44872e-10	0.53378	2.79072e-07
AT2G04500	4.63617	1.2362e-16	2.1894	1.06532e-05
AT2G04550	1.53261	3.98714e-09	1.1059	0.151838
AT2G04570	2.8334	1.50184e-12	1.27314	0.115545
AT2G04780	2.82496	1.12847e-39	1.19049	0.0364665
AT2G04790	1.67654	0.00204041	0.887433	0.501966
AT2G05160	2.18399	1.22093e-09	0.886497	0.382736
AT2G05380	0.589296	1.16737e-18	0.954228	0.412708
AT2G05520	0.649168	1.78958e-12	1.09149	0.148959
AT2G05580	5.35461	0.000107635	2.29258	0.0675497
AT2G05632	2.64222	6.46056e-07	0.994102	1
AT2G06850	5.39724	4.9968e-74	1.30233	0.00300557
AT2G06950	0.558185	7.25064e-15	0.870299	0.0478877
AT2G07680	0.62872	4.2527e-05	0.58027	2.70588e-06
AT2G10931	0.630471	0.00316853	0.626907	0.00480991
AT2G10940	2.99942	5.87845e-20	1.4407	0.00250764
AT2G11810	17.5958	7.70524e-10	0.584235	0.716014
AT2G12400	2.48021	4.23761e-20	1.42121	0.000749275
AT2G12646	0.581241	0.00999517	0.581043	0.0406442
AT2G13610	0.547309	0.000121009	0.936542	0.617019
AT2G14160	7.40829	4.44507e-16	0.852484	0.673894
AT2G14170	1.58826	3.69953e-14	1.12896	0.0457146
AT2G14890	4.34205	1.88339e-114	1.09476	0.151194
AT2G14900	1.6245	5.27999e-14	1.04724	0.464156
AT2G14960	13.4442	1.14739e-05	1.25345	0.687448
AT2G15300	0.662979	0.00344625	0.79624	0.113744
AT2G15440	2.60314	1.38985e-05	0.644192	0.201215
AT2G15480	0.550651	1.33453e-06	0.557151	1.33497e-06
AT2G15490	0.17608	1.61935e-50	0.305233	5.38545e-24
AT2G15620	0.479238	6.52266e-24	0.927612	0.296663
AT2G15760	0.49696	5.77999e-05	0.678835	0.014125
AT2G15780	0.442131	3.4781e-05	0.679213	0.0244124
AT2G15790	1.53543	0.000144399	1.08114	0.524537
AT2G15830	2.02551	6.41507e-10	1.44154	0.00176559
AT2G16060	0.391515	5.79568e-05	2.20773	0.000369092
AT2G16270	3.10742	1.42388e-06	1.11879	0.850822
AT2G16280	3.87935	2.78284e-71	1.14969	0.0826874
AT2G16430	0.55324	3.82551e-08	0.996137	0.989254
AT2G16630	2.71954	1.78147e-05	1.20162	0.382558
AT2G16650	0.64927	2.49083e-05	0.679211	0.000250269
AT2G16660	0.567136	0.0034355	0.818354	0.294667
AT2G16700	0.620593	1.04196e-08	0.752375	0.00070293
AT2G16750	1.73612	4.71207e-11	1.25632	0.00691873
AT2G17070	0.0617458	9.64019e-10	0.355742	0.009991
AT2G17080	0.0600716	2.04833e-27	0.25834	5.21823e-08
AT2G17300	4.78081	1.1372e-07	1.01259	1
AT2G17450	1.5176	1.71174e-07	1.16927	0.0669006
AT2G17525	0.615778	0.000162982	0.925487	0.54634
AT2G17550	1.96296	5.14195e-18	1.2908	0.0014005
AT2G17600	Inf	0.00236215	NA	NA
AT2G17660	6.58041	4.51124e-05	4.18549	0.00797327
AT2G17680	14.7612	0.000173543	Inf	0.0662151
AT2G17840	1.86489	0.000799641	3.15522	1.54998e-09
AT2G17850	0.337182	3.10043e-06	5.21	8.82985e-15
AT2G18010	36.3906	3.56907e-45	1.16146	1
AT2G18050	0.47605	2.62333e-17	0.583977	1.37841e-09
AT2G18180	3.12512	0.00198536	2.09149	0.120142
AT2G18196	1.57903	4.95241e-06	1.11254	0.292155
AT2G18550	2.89414	0.000300042	0.865612	0.565886
AT2G18650	2.00843	4.1769e-05	1.41049	0.0425763
AT2G18700	2.2497	1.04055e-38	1.05621	0.353114
AT2G18730	0.560504	4.22315e-12	0.77015	0.00130233
AT2G18790	0.604451	3.33612e-12	0.709726	2.12996e-06
AT2G18900	0.631068	1.80826e-06	1.05691	0.540698
AT2G18950	0.587515	0.000711065	0.763774	0.107398
AT2G19190	0.548288	6.74882e-05	0.766152	0.0240347
AT2G19310	0.648608	2.09394e-06	1.44293	4.45226e-05
AT2G19590	0.388823	0.000243267	1.77238	0.0193171
AT2G19620	2.52034	3.3617e-18	2.10943	2.0116e-13
AT2G19640	0.5928	0.000569158	1.03152	0.889127
AT2G19660	1.73518	0.000245223	1.76121	0.0066767
AT2G19760	2.6045	6.07915e-48	1.07227	0.295874
AT2G19780	6.55648	1.06994e-13	0.538165	0.154283
AT2G19800	5.22565	4.85887e-147	0.990381	0.908951
AT2G19810	1.72374	1.53916e-09	0.977865	0.835357
AT2G19880	2.18417	3.65398e-15	0.907534	0.360807
AT2G20100	0.570048	2.18355e-07	0.532496	4.47031e-09
AT2G20560	0.629115	1.75092e-05	4.79855	5.29018e-52
AT2G20562	2.38541	0.00244644	1.43161	0.174647
AT2G20724	3.12542	5.79569e-25	1.01599	0.968989
AT2G20750	6.29113	7.3519e-09	2.7871	0.262252
AT2G20880	61.0108	1.23344e-109	15.3153	3.33787e-60
AT2G21100	0.343901	0.00231314	0.683034	0.476097
AT2G21140	10.9154	1.51936e-22	1.59147	0.0326742
AT2G21200	8.31596	1.33478e-12	NA	NA
AT2G21210	8.18277	5.88878e-42	1.49306	0.426224
AT2G21220	4.97332	9.03513e-08	1.89865	0.0880178
AT2G21330	1.87924	2.09523e-06	1.06157	0.695707
AT2G21500	1.8492	7.22925e-16	1.37334	1.62957e-05
AT2G21530	1.58183	1.9008e-05	0.938456	0.593282
AT2G21540	2.26115	8.54486e-29	1.67041	6.64263e-12
AT2G21560	0.581943	5.12118e-08	1.05768	0.651405
AT2G21660	0.615855	2.65332e-08	0.99699	0.944344
AT2G21880	25.6531	1.31083e-50	1.52353	0.195127
AT2G21910	0.648953	8.77103e-09	0.690758	4.18443e-07
AT2G22080	2.14104	4.09448e-30	1.38337	1.27729e-06
AT2G22170	1.61499	4.61574e-12	1.24687	0.0028362
AT2G22200	1.88018	0.000328549	1.21877	0.420449
AT2G22420	0.614825	4.42626e-06	0.810711	0.0486195
AT2G22470	3.59111	1.78394e-47	0.955383	0.633199
AT2G22800	1.52094	0.00260348	1.04351	0.792883
AT2G22810	Inf	1.40359e-12	Inf	0.105095
AT2G22830	1.9726	9.58362e-06	1.05629	0.814329
AT2G22850	1.95255	6.0504e-05	0.628724	0.00937096
AT2G22890	1.68775	1.39779e-07	1.16554	0.132873
AT2G23030	1.52129	1.49429e-05	0.771623	0.0077819
AT2G23050	0.114015	6.76942e-07	0.180584	0.00040649
AT2G23130	0.471064	1.39238e-09	0.931321	0.493108
AT2G23170	2.69237	3.56585e-05	0.528844	0.00945226
AT2G23180	0.0852115	1.14075e-16	0.088323	1.14327e-07
AT2G23330	0.655679	7.80118e-05	0.834432	0.103999
AT2G23810	1.69165	9.95751e-07	1.3618	0.00309675
AT2G23960	0.136447	9.22132e-05	0.487743	0.0442932
AT2G23970	0.395085	0.000428369	0.438155	0.00301681
AT2G24240	1.59222	6.39495e-07	1.36626	0.00073407
AT2G24280	1.55336	2.81839e-08	1.02107	0.826314
AT2G24300	1.86671	2.65157e-12	1.25261	0.0248249
AT2G24330	1.85731	1.61478e-13	1.05061	0.514704
AT2G24550	1.68744	5.52828e-13	1.17793	0.0243319
AT2G24570	0.563441	1.72957e-12	0.904914	0.23259
AT2G24700	0.42356	0.000968123	0.735908	0.345881
AT2G25000	3.70434	1.02774e-12	1.40006	0.100412
AT2G25080	1.62896	8.35656e-14	1.11186	0.108333
AT2G25140	0.600958	7.77564e-09	2.97706	9.94994e-37
AT2G25160	0.118407	0.00342335	3.18223	0.146782
AT2G25200	5.23037	3.05089e-25	1.44309	0.0156381
AT2G25220	1.86855	6.32181e-05	1.47388	0.0280494
AT2G25460	2.67521	1.62793e-05	1.05922	0.741741
AT2G25680	0.287089	0.000254944	0.426568	0.0188372
AT2G25770	1.51866	0.000606652	0.947733	0.677162
AT2G25880	0.404765	1.51128e-07	1.35978	0.137089
AT2G25980	0.534594	8.23323e-12	0.537936	5.6574e-10
AT2G26040	0.321169	0.0016365	1.79082	0.0352746
AT2G26150	0.572365	0.00528228	8.64749	6.20378e-34
AT2G26440	1.82596	0.000691937	1.02188	0.842336
AT2G26560	0.348507	0.000173835	0.730799	0.270839
AT2G26640	2.01129	4.64714e-10	0.934171	0.604601
AT2G26695	1.61252	0.00154459	0.824394	0.314853
AT2G26710	3.83703	4.47704e-51	1.48941	6.07813e-05
AT2G26730	1.55509	5.66226e-10	1.1018	0.174436
AT2G26740	0.421833	1.43274e-36	0.586239	1.46489e-15
AT2G26910	1.88168	2.27533e-07	1.48158	0.00117915
AT2G27240	37.4953	6.56972e-17	0.652595	0.42362
AT2G27360	0.592337	2.43154e-08	0.669752	1.99391e-05
AT2G27370	0.359601	6.76758e-17	0.701078	0.00758314
AT2G27550	0.102251	3.06678e-28	1.14698	0.437366
AT2G27830	1.92189	7.64195e-24	1.02335	0.677663
AT2G27930	3.66714	3.55225e-12	1.54416	0.350373
AT2G28056	2.76016	0.00179338	1.86428	0.013519
AT2G28080	1.93526	5.32255e-09	1.54817	6.77014e-05
AT2G28200	1.60374	7.32538e-11	0.978104	0.728206
AT2G28305	2.75101	3.76485e-17	0.895754	0.428565
AT2G28310	1.59684	1.05921e-08	0.882547	0.165317
AT2G28470	0.505518	0.000378972	0.352378	2.28906e-07
AT2G28630	1.9836	7.92012e-09	1.59219	0.000105102
AT2G28760	0.528631	2.33677e-05	0.935415	0.692683
AT2G28930	1.50178	8.91919e-06	1.49074	9.67561e-06
AT2G28950	1.60918	6.67213e-06	1.33287	0.0152068
AT2G29310	0.354368	1.26983e-09	0.673443	0.0529371
AT2G29340	1.62579	1.30331e-05	1.55719	6.572e-05
AT2G29390	0.320618	4.53172e-27	0.381446	6.94971e-19
AT2G29490	0.621324	0.00780346	0.895777	0.620353
AT2G29500	0.402683	2.25346e-07	13.4516	7.33608e-46
AT2G29550	1.8098	1.83966e-18	0.943216	0.406718
AT2G29620	0.467707	6.90167e-05	0.422587	0.00647355
AT2G29730	1.56102	8.08607e-07	1.29921	0.00638835
AT2G29740	1.84304	3.35719e-06	1.20347	0.141636
AT2G29940	0.436191	1.40204e-06	0.935788	0.716489
AT2G29980	0.491945	1.456e-25	0.618506	2.0615e-11
AT2G29990	0.515741	1.34903e-07	0.599612	5.64708e-05
AT2G30010	2.74676	1.41441e-12	1.86033	6.62784e-05
AT2G30040	1.69689	6.18992e-08	1.67411	1.53774e-07
AT2G30070	0.258965	4.53011e-25	0.24669	5.96272e-27
AT2G30140	0.496726	7.1826e-05	0.566739	0.00124231
AT2G30210	0.428757	3.31323e-16	0.771904	0.0171818
AT2G30230	1.6554	6.51757e-06	1.16186	0.171671
AT2G30360	2.54225	2.75705e-09	1.32767	0.134884
AT2G30370	1.85547	0.00712984	0.42785	0.0619561
AT2G30460	1.65488	6.81086e-05	0.891255	0.393986
AT2G30575	1.6576	2.72364e-06	1.00739	0.965799
AT2G30750	0.555505	0.00592955	0.63981	0.00051802
AT2G30870	0.51242	2.04574e-09	0.853695	0.179711
AT2G30930	4.52804	2.78833e-116	1.13272	0.0553053
AT2G31010	1.59484	1.15406e-05	1.48961	0.000143721
AT2G31110	1.83758	2.45352e-07	0.824424	0.13523
AT2G31180	0.22623	1.37593e-05	0.375099	9.65912e-05
AT2G31390	0.656785	0.00358979	1.97875	1.05464e-06
AT2G31680	1.77998	1.18247e-07	1.05262	0.59432
AT2G32020	2.11145	0.000339961	1.28433	0.140935
AT2G32280	2.04344	9.70791e-09	0.939841	0.671632
AT2G32300	0.309808	7.31789e-32	1.06104	0.646836
AT2G32450	1.93086	2.13215e-12	1.0773	0.445832
AT2G32560	1.59319	3.41332e-10	0.708495	4.28934e-06
AT2G32620	2.3638	0.00780595	1.71747	0.0201485
AT2G32800	2.0623	9.37597e-19	1.51266	5.80984e-07
AT2G32880	2.0525	3.33877e-16	1.15584	0.0911596
AT2G32930	0.609475	0.000762575	1.01172	0.931887
AT2G32990	0.0490266	3.13851e-06	0.443659	0.21108
AT2G33130	0.277911	0.00810833	0.496476	0.0775569
AT2G33210	0.637722	1.97511e-06	1.00555	0.997773
AT2G33380	3.00048	3.38734e-09	1.83543	0.000601081
AT2G33420	Inf	0.00365038	Inf	0.924698
AT2G33570	2.12773	1.70013e-23	0.954095	0.528472
AT2G34070	2.89485	1.75908e-28	1.01085	0.922247
AT2G34180	3.43281	1.71407e-06	1.787	0.0272381
AT2G34315	2.67386	0.000759277	0.882522	0.841968
AT2G34390	0.363718	0.000829388	4.58194	1.41404e-07
AT2G34430	2.18788	0.00150311	0.8609	0.534441
AT2G34670	2.05022	3.99514e-08	1.10642	0.499207
AT2G34770	1.60676	1.3654e-12	1.0195	0.773619
AT2G34790	0.567067	1.52437e-07	0.656383	0.000125672
AT2G35170	1.53098	3.99197e-09	1.02368	0.748015
AT2G35200	0.254966	0.000114071	0.452974	0.0856166
AT2G35230	1.6786	4.44027e-11	0.930439	0.384076
AT2G35420	1.56352	0.00424637	1.03136	0.900525
AT2G35650	2.30249	1.01552e-18	1.35531	0.00230863
AT2G35710	4.27539	7.05608e-10	1.6639	0.020621
AT2G35800	1.64902	9.82008e-13	1.13495	0.0759953
AT2G35820	0.660687	6.88535e-06	0.892693	0.241933
AT2G35860	2.12715	3.79304e-14	1.56194	8.08643e-05
AT2G35880	2.4339	1.10279e-40	1.00635	0.931816
AT2G35980	0.451379	0.000585216	1.35794	0.161866
AT2G35990	62.1394	0.00818626	NA	NA
AT2G36100	0.430803	8.11785e-22	0.711561	0.000318091
AT2G36220	3.11825	9.04749e-21	2.47272	4.66984e-14
AT2G36310	3.37461	5.49654e-57	1.02756	0.663539
AT2G36410	2.21355	9.85115e-30	1.04184	0.557586
AT2G36570	0.547036	1.63836e-11	0.890633	0.185822
AT2G36590	7.12199	2.4027e-09	15.9199	1.54248e-09
AT2G36830	2.36275	6.71892e-44	1.6217	1.29566e-14
AT2G36870	0.157622	3.65e-32	0.458958	5.65044e-08
AT2G36880	0.610895	3.6422e-12	0.69289	3.40792e-07
AT2G36890	0.400166	1.24378e-22	0.474271	4.23735e-13
AT2G36910	0.518802	8.8281e-21	0.800825	0.001847
AT2G37025	0.607354	1.42248e-14	1.01841	0.783455
AT2G37030	0.0280098	1.49386e-33	0.0796722	4.66843e-15
AT2G37170	2.67929	3.11787e-58	1.28589	3.78386e-05
AT2G37180	8.35461	5.84307e-118	2.59323	1.39951e-26
AT2G37210	2.27409	0.00589653	1.97502	0.0299456
AT2G37280	0.597278	4.43709e-09	0.712832	7.6965e-05
AT2G37540	7.7641	1.52286e-22	1.79495	0.000595188
AT2G37700	1.95105	0.0074316	2.99772	0.000264491
AT2G37940	1.9015	3.81026e-06	1.15097	0.267588
AT2G37980	1.72583	2.89307e-05	1.08354	0.514884
AT2G38010	0.588357	8.74741e-05	0.729479	0.0243308
AT2G38210	2.09296	0.00309409	0.774843	0.273912
AT2G38230	1.81042	6.97249e-19	1.0278	0.697578
AT2G38400	1.53872	1.12133e-12	0.789362	7.16309e-05
AT2G38480	3.43043	4.08677e-17	0.920322	0.685887
AT2G38500	3.62353	5.12033e-16	1.24422	0.343191
AT2G38610	2.03503	1.50957e-14	1.17849	0.0902105
AT2G38640	1.84622	0.000291078	2.21283	3.04127e-05
AT2G38820	1.6466	1.14938e-11	0.826745	0.00883203
AT2G38860	0.642445	5.63473e-05	0.842425	0.126214
AT2G38970	0.652629	0.000403668	1.03444	0.854438
AT2G39010	2.01983	4.10524e-28	1.1268	0.0607129
AT2G39110	1.93371	8.56634e-10	1.13277	0.246073
AT2G39130	1.596	7.56976e-05	1.13094	0.299644
AT2G39180	2.23495	1.62616e-21	0.888714	0.204274
AT2G39430	0.461624	7.60001e-09	0.636207	0.00252265
AT2G39530	0.487568	1.4559e-07	0.556622	4.41112e-06
AT2G39570	1.64752	2.9299e-16	1.01752	0.731504
AT2G39650	1.94454	2.42598e-06	1.51152	0.0011946
AT2G39675	0.634338	0.00686604	1.10092	0.568733
AT2G39830	1.58827	0.00238082	1.09814	0.60399
AT2G39890	1.79395	3.64847e-08	0.882535	0.300582
AT2G39900	1.52145	1.70969e-05	1.07526	0.559668
AT2G40113	0.66051	0.00378917	0.884007	0.363409
AT2G40150	0.630911	0.00139975	1.18497	0.2584
AT2G40230	0.57962	2.4682e-07	1.03781	0.756402
AT2G40250	13.2066	1.6828e-11	1.29843	0.723895
AT2G40270	1.56818	0.000347305	1.34744	0.0139791
AT2G40390	0.244257	7.80183e-07	0.453018	0.00220145
AT2G40420	1.82931	2.38323e-20	1.08285	0.21749
AT2G40470	8.88016	5.74488e-16	0.448267	0.00351413
AT2G40610	10.8167	1.02272e-14	7.34897	1.16259e-05
AT2G40670	0.530061	0.000867241	1.29724	0.18795
AT2G40840	0.632153	2.40265e-06	0.792295	0.0188625
AT2G40890	0.618709	8.75741e-11	0.719315	5.09699e-06
AT2G41050	0.243157	1.92239e-25	0.869562	0.375209
AT2G41070	0.452457	4.40942e-18	0.960031	0.734467
AT2G41100	5.00998	0.000106006	1.68629	0.171431
AT2G41110	1.97005	7.95525e-24	1.23954	0.00101333
AT2G41170	3.04689	1.44485e-21	1.57015	0.000194219
AT2G41190	2.86088	8.87815e-13	1.08135	0.589168
AT2G41230	0.258167	4.93469e-10	0.674059	0.0547362
AT2G41310	0.535735	4.49501e-15	0.939422	0.489506
AT2G41380	0.370881	1.67519e-08	0.32658	6.76863e-10
AT2G41420	2.09749	2.28377e-27	1.2667	0.000392209
AT2G41475	1.83077	6.45078e-08	0.960314	0.776796
AT2G41540	1.56717	4.4054e-11	1.09864	0.154811
AT2G41640	3.29585	4.01236e-15	1.65727	0.000500755
AT2G41690	0.272661	0.00044767	0.575814	0.135621
AT2G41750	0.605388	2.59871e-07	0.811405	0.0569253
AT2G41770	1.57814	4.43888e-07	0.909746	0.342489
AT2G41780	0.6397	0.000737438	0.748675	0.0459583
AT2G41870	2.19	7.86712e-10	0.930432	0.597429
AT2G41880	2.17071	1.43409e-14	1.46063	0.000122994
AT2G41890	0.572036	1.71672e-06	0.888366	0.331304
AT2G41970	2.56974	2.60283e-05	1.40113	0.12492
AT2G42380	2.94021	2.91218e-21	2.00699	1.57705e-06
AT2G42430	0.448129	8.05711e-08	0.300208	2.01738e-14
AT2G42610	0.59289	0.00582626	1.09984	0.640857
AT2G42800	0.414938	0.000325178	0.158728	2.97289e-05
AT2G42840	2.23402	5.76282e-15	2.00059	2.03416e-10
AT2G42850	1.61139	0.00525164	1.2542	0.180972
AT2G42870	1.97215	5.03897e-21	1.17368	0.0371259
AT2G42900	3.7468	7.38065e-49	1.0532	0.606783
AT2G42950	0.375078	7.46003e-10	0.459881	9.03588e-07
AT2G42990	0.33696	7.82714e-06	0.240744	1.43065e-05
AT2G43000	0.504535	0.00696885	0.84968	0.390896
AT2G43050	0.504309	3.21239e-08	0.326816	2.99167e-10
AT2G43060	0.454411	3.58915e-22	0.335311	7.42967e-35
AT2G43110	0.539844	0.000407173	0.72177	0.062497
AT2G43200	0.608452	0.000176246	1.08678	0.540389
AT2G43290	3.16806	2.47836e-49	1.73004	1.02008e-11
AT2G43330	1.98649	6.92094e-22	0.993672	0.953391
AT2G43340	3.67399	8.04636e-53	1.08739	0.404722
AT2G43400	1.50332	8.04648e-11	1.0481	0.448002
AT2G43500	0.403674	4.27464e-09	0.493035	4.17252e-06
AT2G43535	0.644984	2.84751e-05	0.833677	0.109261
AT2G43800	0.629018	0.00463179	1.14852	0.463087
AT2G43910	0.345405	7.15743e-63	0.344121	3.53905e-64
AT2G44230	7.65147	3.0685e-34	1.33773	0.418755
AT2G44450	2.60914	1.83918e-17	1.21846	0.086966
AT2G44500	1.90356	1.02068e-16	1.16965	0.0470277
AT2G44510	0.499753	3.42165e-06	1.06997	0.644173
AT2G44570	0.352991	2.14015e-15	0.331269	1.13076e-18
AT2G44600	1.56525	0.00798616	1.14642	0.435917
AT2G44740	2.6798	1.08467e-15	1.60137	0.0215424
AT2G44790	1.50603	1.1922e-11	0.904396	0.0917268
AT2G44798	0.311616	0.000684868	3.21843	0.000274178
AT2G44910	0.131635	1.14512e-29	0.415933	0.000474565
AT2G45010	1.51563	4.89305e-07	1.17677	0.0422892
AT2G45080	0.160164	0.00022281	0.589019	0.202048
AT2G45150	0.579767	0.00342597	0.662022	0.0434268
AT2G45180	1.74425	2.18043e-11	1.1349	0.142839
AT2G45210	0.286106	5.98225e-43	0.185492	5.18259e-76
AT2G45290	0.587009	8.80593e-10	0.697127	1.53039e-05
AT2G45300	0.634967	2.79749e-10	0.75339	6.16508e-05
AT2G45400	2.00814	5.57023e-18	1.37685	0.000105833
AT2G45470	1.63598	2.67148e-05	0.741334	0.0147918
AT2G45740	1.54033	2.44699e-11	1.07258	0.268051
AT2G45820	2.22622	2.69586e-37	1.25386	0.000322435
AT2G45960	2.47512	2.84075e-50	1.08187	0.205192
AT2G46150	1.86319	0.00101125	1.48937	0.0443004
AT2G46225	0.549504	1.45068e-13	0.67913	1.67126e-06
AT2G46270	1.66952	8.55237e-13	1.30883	0.000215707
AT2G46330	2.27034	1.40762e-16	1.32603	0.0034231
AT2G46450	0.493866	0.00410618	1.44818	0.107088
AT2G46495	0.539098	0.00260105	0.724947	0.137796
AT2G46660	0.448144	1.77307e-09	0.450333	3.7043e-06
AT2G46680	1.72221	0.00288049	1.06673	0.686786
AT2G46690	2.23583	5.66463e-20	1.06125	0.547157
AT2G46750	0.657382	4.15743e-05	0.325333	1.86445e-29
AT2G46780	3.08422	1.03976e-22	1.30189	0.0310318
AT2G46850	0.138167	0.000331396	0.128705	0.0540988
AT2G46950	2.04108	1.05366e-08	0.817611	0.200974
AT2G46980	0.621976	0.00126863	0.906153	0.547429
AT2G47190	0.496337	0.000288689	0.772562	0.133155
AT2G47260	0.594072	0.000695415	0.732797	0.0325179
AT2G47270	2.05124	1.67778e-18	1.04868	0.574472
AT2G47440	3.16809	5.14878e-60	1.01672	0.840711
AT2G47500	2.42452	5.7678e-19	1.07174	0.679547
AT2G47520	0.347157	5.55094e-05	8.34629	5.80087e-38
AT2G47560	1.71117	0.00911301	1.77018	0.00535152
AT2G47990	0.512112	9.37727e-08	1.11611	0.393405
AT2G48030	1.7359	2.08757e-09	1.02329	0.789658
AT2G48090	0.498776	0.00917136	0.523968	0.00915784
AT3G01190	1.81022	0.00680573	1.41358	0.145318
AT3G01220	1.52238	6.65939e-06	1.17065	0.142813
AT3G01290	1.84198	6.76939e-07	1.19623	0.130139
AT3G01420	0.528501	2.30048e-22	0.342845	2.40497e-55
AT3G01430	1.99877	1.49295e-05	1.14118	0.464926
AT3G01440	2.11579	0.00228903	1.52457	0.371232
AT3G01970	0.460321	5.32589e-10	0.417968	6.79853e-13
AT3G02040	1.57967	4.69783e-08	1.45756	1.91961e-06
AT3G02240	0.448542	0.000883629	0.495474	0.00228542
AT3G02250	1.55827	1.01776e-08	1.08345	0.312251
AT3G02460	1.58637	9.69379e-08	0.904657	0.302414
AT3G02500	0.376948	5.68737e-07	0.652734	0.0503645
AT3G02510	0.643434	2.3227e-05	0.74835	0.00919251
AT3G02570	1.90533	3.47298e-13	1.07801	0.42663
AT3G02770	1.61776	0.000558916	1.47969	0.00431991
AT3G02830	2.44821	1.5606e-10	1.05239	0.839491
AT3G02880	1.69634	1.22257e-11	1.31695	0.000289829
AT3G02910	0.619217	0.00013806	0.954224	0.668312
AT3G02930	0.535191	7.23739e-06	0.610162	0.00067615
AT3G03060	0.44252	3.41391e-06	0.769859	0.151952
AT3G03110	0.536417	1.00054e-10	1.39682	0.000271436
AT3G03150	1.56771	4.64442e-12	0.885582	0.0605798
AT3G03170	1.73817	5.18598e-05	1.00595	1
AT3G03180	1.82955	1.93005e-08	0.917442	0.468116
AT3G03240	22.9163	5.97703e-13	0.823176	0.663319
AT3G03280	2.91647	2.37187e-09	2.1574	9.5549e-06
AT3G03670	0.0479299	0.00126931	0.681871	0.362189
AT3G03780	0.482601	1.63468e-06	0.441458	1.04232e-07
AT3G03820	8.57566	2.5294e-25	2.36498	0.873429
AT3G03830	20.3905	1.58279e-45	Inf	0.914812
AT3G03840	17.4866	3.99698e-37	1.09865	1
AT3G03850	12.761	7.54711e-42	NA	NA
AT3G04010	0.629189	0.000217058	0.635396	0.000729021
AT3G04030	0.442653	1.56231e-05	1.31201	0.164104
AT3G04130	0.641361	0.00667262	1.03791	0.860284
AT3G04420	0.608691	0.0051716	0.37719	1.31384e-08
AT3G04630	2.64606	1.05245e-22	1.64022	6.45133e-06
AT3G04640	1.78561	0.000173585	2.3109	1.68973e-08
AT3G04710	0.62616	1.85155e-06	1.19511	0.0650174
AT3G04810	0.626516	1.94461e-09	0.818108	0.00944008
AT3G04910	1.58417	1.5316e-12	0.777429	0.000184364
AT3G05150	2.72135	8.20069e-49	0.776267	0.000251285
AT3G05160	0.48408	7.01751e-22	0.500487	3.49059e-19
AT3G05320	2.51279	1.6609e-11	1.91148	1.04387e-06
AT3G05390	0.659757	0.00116686	0.758835	0.0231223
AT3G05490	3.98312	2.16474e-73	1.49864	8.81824e-08
AT3G05640	8.18164	2.26898e-82	1.86642	1.55538e-08
AT3G05660	0.339606	4.73488e-07	1.07323	0.640704
AT3G05800	3.55177	2.75315e-16	1.95861	0.000576838
AT3G05890	3.01909	8.90634e-50	1.2012	0.0300415
AT3G05900	1.95663	1.1435e-17	1.20317	0.0272735
AT3G05910	2.77502	1.39441e-53	1.0549	0.412389
AT3G05936	6.25322	8.13636e-05	1.82025	0.328984
AT3G06020	0.144028	0.00153891	0.557277	0.254899
AT3G06060	1.99708	1.49545e-17	1.09731	0.262879
AT3G06070	3.51357	6.02147e-64	1.08339	0.276772
AT3G06140	1.75367	0.000153745	1.62527	0.00562594
AT3G06145	3.05824	0.00141143	0.877675	1
AT3G06150	1.58518	2.12337e-07	0.966942	0.761396
AT3G06460	3.85523	8.66649e-05	6.17043	2.30485e-07
AT3G06530	0.576259	7.19481e-07	1.02673	0.777867
AT3G06590	1.55655	9.93336e-09	0.798583	0.00502336
AT3G06640	2.24223	0.00170686	0.753043	0.637231
AT3G06750	2.15725	1.97123e-24	0.565554	3.68765e-13
AT3G06770	4.06325	4.63688e-51	1.46098	0.000193625
AT3G06780	1.52707	5.99529e-08	0.889866	0.131111
AT3G06850	2.0861	1.92824e-32	1.02898	0.616378
AT3G06868	4.45056	1.40645e-07	0.714605	0.713517
AT3G06990	4.56338	3.45393e-25	1.32438	0.0955934
AT3G07000	4.81194	5.93401e-26	1.03328	0.943486
AT3G07010	4.88787	4.47213e-40	1.77475	1.12094e-05
AT3G07210	1.51157	1.62481e-05	0.981211	0.852281
AT3G07340	1.78411	2.17667e-06	0.952893	0.760456
AT3G07350	1.67391	4.46774e-13	0.999433	0.989544
AT3G07470	1.722	4.04275e-15	0.892116	0.1102
AT3G07540	2.7018	6.9893e-18	1.25605	0.0824841
AT3G07570	1.5805	9.89884e-10	1.10065	0.209794
AT3G07970	0.351619	0.000206065	0.481004	0.00319459
AT3G08600	2.54794	3.26987e-16	1.20726	0.154737
AT3G08640	0.575135	2.29027e-11	0.76032	0.000999168
AT3G08770	0.329363	0.00685495	0.740456	0.505361
AT3G08970	0.634781	0.00117187	1.12534	0.344263
AT3G09010	0.385122	9.46092e-05	0.666023	0.0597089
AT3G09032	2.04535	0.00530097	1.59365	0.053018
AT3G09220	0.451266	1.32787e-05	0.52039	0.000227087
AT3G09280	0.0885044	0.00696972	0	0.0229269
AT3G09300	1.64903	1.43517e-13	1.03291	0.620745
AT3G09710	2.23099	7.66139e-08	0.931954	0.733472
AT3G09780	1.61944	3.98251e-05	1.24174	0.105551
AT3G10040	0.19018	8.06596e-06	2.94891	0.00188829
AT3G10080	2.23516	7.68016e-08	1.00842	1
AT3G10120	2.05408	2.69523e-10	1.1147	0.34429
AT3G10300	1.50095	1.3759e-08	1.41393	6.53296e-07
AT3G10520	0.453203	0.000352929	0.528137	0.00906923
AT3G10525	1.77927	2.19735e-07	1.03796	0.848781
AT3G10530	0.600452	6.02459e-05	0.880853	0.294476
AT3G10660	1.7292	3.59117e-07	0.997162	0.991111
AT3G10870	0.408286	0.00346137	0.387909	0.00707363
AT3G11385	1.90455	0.00510418	1.42526	0.129213
AT3G11420	1.56659	5.91764e-09	1.05814	0.463459
AT3G11490	0.577737	1.45695e-07	0.72463	0.00230039
AT3G11550	0.599646	1.7173e-06	0.628152	0.000143766
AT3G11570	1.66895	0.00530014	1.34859	0.104594
AT3G11580	1.82447	5.04269e-08	1.66058	1.18282e-06
AT3G11600	1.50889	4.02701e-06	1.57357	2.70718e-06
AT3G11640	9.62714	0.000145154	0.735468	0.750887
AT3G11650	1.75345	3.45681e-05	1.28111	0.0837237
AT3G11700	2.36325	2.03831e-39	1.19637	0.0058394
AT3G11770	0.63817	5.14164e-08	0.79142	0.00605919
AT3G11930	0.537222	0.000573423	1.21601	0.26899
AT3G11964	0.618693	3.1977e-09	1.07668	0.363248
AT3G12110	6.72202	1.58789e-88	1.44681	0.000172816
AT3G12120	0.554516	1.36191e-21	0.794437	0.000154698
AT3G12145	0.253953	1.51993e-06	0.837891	0.575791
AT3G12220	0.410212	0.000146903	0.657935	0.0963723
AT3G12560	1.63458	3.24847e-11	0.925512	0.293165
AT3G12580	0.532167	1.48205e-05	4.30164	1.32197e-22
AT3G12610	2.18938	1.06526e-33	0.772849	0.000176813
AT3G12700	0.626526	7.57641e-08	0.689147	7.66333e-06
AT3G12820	0.650348	1.08986e-07	0.817261	0.0130034
AT3G12830	4.56013	3.3214e-25	0.998156	0.997612
AT3G13040	0.658202	2.57468e-09	0.643572	3.4305e-10
AT3G13380	0.228656	4.63155e-39	0.314803	7.46061e-24
AT3G13404	0.561088	8.34673e-06	1.01257	1
AT3G13405	0.40729	7.21754e-06	1.09172	0.716781
AT3G13430	1.83106	3.13214e-13	1.07495	0.343288
AT3G13435	1.59157	0.00105667	1.05377	0.724091
AT3G13437	1.88441	0.00118593	1.94851	0.000189765
AT3G13450	1.87366	5.97312e-24	1.10619	0.104018
AT3G13520	2.17834	2.20811e-34	1.02078	0.695481
AT3G13600	1.87303	4.20919e-08	1.1709	0.140293
AT3G13610	0.469905	3.87751e-18	0.632343	2.68091e-08
AT3G13730	0.0392281	2.48944e-100	0.116856	1.28879e-68
AT3G13750	3.01482	7.41005e-44	1.0387	0.649407
AT3G13965	2.09617	6.77426e-07	1.13588	0.39378
AT3G13980	1.82444	4.15945e-05	0.582532	0.00336177
AT3G14060	2.47702	8.55458e-08	1.03729	0.875808
AT3G14067	1.61804	8.65165e-06	0.956217	0.697763
AT3G14210	0.188148	1.50016e-08	1.86602	0.00014018
AT3G14230	0.615875	1.34833e-07	0.806104	0.0155771
AT3G14370	3.16615	2.15356e-07	5.50121	1.49602e-07
AT3G14440	2.75561	5.16312e-05	1.93412	0.0625447
AT3G14530	4.8116	0.00603875	6.21025	0.0391603
AT3G14620	0.581048	0.000192764	1.01904	0.876806
AT3G14770	1.62405	5.00843e-07	1.23463	0.0244351
AT3G14940	0.603837	0.00289137	0.62129	0.00616831
AT3G15030	0.632569	2.69279e-05	0.827675	0.115535
AT3G15115	3.67209	1.17573e-34	1.5683	0.000280108
AT3G15240	0.603489	0.00355208	0.707623	0.118883
AT3G15360	1.54141	2.69384e-09	0.999831	0.966594
AT3G15460	0.495947	0.000337742	0.735789	0.147309
AT3G15480	1.52232	2.70521e-09	1.34046	3.23368e-05
AT3G15510	1.58573	5.19938e-09	1.16002	0.0516674
AT3G15530	1.79044	3.06535e-17	1.5431	1.27271e-10
AT3G15540	9.16387	2.00272e-109	1.12492	0.528206
AT3G15570	1.89346	5.44146e-07	2.26564	1.37862e-09
AT3G15630	2.4852	1.23971e-46	1.05052	0.432126
AT3G15680	0.478958	0.000201236	0.397191	4.08158e-05
AT3G15690	1.72771	0.00437715	0.784387	0.211652
AT3G15760	1.60285	0.00392221	1.07902	0.581642
AT3G15820	1.50285	2.15113e-05	0.864612	0.157987
AT3G15890	2.08459	2.70339e-06	0.896125	0.550094
AT3G15990	0.511857	0.000104415	1.07397	0.779389
AT3G16120	3.04146	1.6195e-09	1.26696	0.207747
AT3G16150	1.66379	5.7826e-05	0.820005	0.113895
AT3G16240	3.2481	4.09286e-82	1.3513	1.02807e-06
AT3G16250	2.13966	1.57765e-05	1.16083	0.501026
AT3G16330	0.537603	4.84437e-05	0.861169	0.343275
AT3G16360	Inf	0.00329077	6.2762	0.302787
AT3G16370	6.24161	2.59397e-49	2.02046	8.10304e-09
AT3G16390	0.209918	4.71999e-10	0.430629	0.000125228
AT3G16420	0.664318	6.87388e-07	0.894734	0.208359
AT3G16470	0.628978	7.73912e-07	0.762796	0.0044746
AT3G16490	1.72745	0.000110732	1.0379	0.802938
AT3G16500	0.471423	2.46248e-26	0.355883	6.16566e-46
AT3G16570	0.530529	1.8698e-20	0.500541	1.48397e-24
AT3G16690	1.77701	3.4764e-11	1.22167	0.0277684
AT3G16700	5.28188	8.06708e-35	1.01067	1
AT3G16800	0.643214	2.89943e-05	0.980022	0.87556
AT3G16850	1.90958	8.17462e-17	1.28312	0.00197066
AT3G17050	3.46053	4.85762e-10	1.29636	0.151033
AT3G17420	1.74865	2.94969e-06	1.28517	0.0299
AT3G17440	1.61224	8.23909e-12	0.995354	0.950167
AT3G17580	5.82999	6.25602e-25	2.79688	6.74658e-05
AT3G17640	2.25501	0.00483509	1.28065	0.563955
AT3G17700	0.603404	3.49093e-05	1.24113	0.0553376
AT3G17860	0.664325	1.35381e-06	1.38435	3.65515e-05
AT3G18040	1.85873	1.44224e-10	0.669075	6.64391e-05
AT3G18200	12.091	1.61582e-24	22.435	7.02661e-21
AT3G18280	0.430648	1.89288e-09	0.665701	0.00221168
AT3G18320	1.65697	0.000102294	1.09155	0.546776
AT3G18450	12.4411	8.57427e-05	2.34082	0.085441
AT3G18610	0.529819	0.000683369	0.492429	0.000404013
AT3G18710	0.229546	7.44976e-09	0.425892	0.0077087
AT3G18773	2.42392	1.45353e-16	1.46728	0.00171649
AT3G18780	1.61394	2.1278e-15	1.13397	0.0369364
AT3G18830	1.85368	1.02612e-05	1.37189	0.019809
AT3G18900	0.17932	0.000612649	0.70827	0.466065
AT3G19370	0.550938	2.39054e-05	0.740505	0.0496928
AT3G19380	0.474611	8.72314e-09	0.338913	5.23353e-13
AT3G19390	2.62945	2.06824e-22	0.723422	0.00117568
AT3G19930	1.81025	4.17226e-22	1.3423	1.15068e-06
AT3G20015	0.555633	3.61218e-07	0.753891	0.0387784
AT3G20160	2.96717	0.00558399	1.88283	0.0476232
AT3G20260	0.590514	4.7877e-06	0.941925	0.629793
AT3G20300	1.86091	4.20736e-07	1.1195	0.373263
AT3G20390	0.584801	8.03372e-05	0.709525	0.00886071
AT3G20395	0.319444	8.02381e-10	1.15231	0.431257
AT3G20670	2.23709	3.19944e-17	0.97755	0.885942
AT3G20830	0.524372	3.50444e-10	0.406111	1.91993e-14
AT3G20840	0.482239	0.0034912	0.680483	0.215443
AT3G21230	0.620011	0.0001297	0.855788	0.213138
AT3G21240	0.557409	3.88146e-11	0.585998	6.51851e-10
AT3G21420	0.399514	0.0040155	0.878566	0.707343
AT3G21460	1.95672	0.00318999	0.66353	0.434688
AT3G21550	0.580873	0.00065836	0.601104	0.0135744
AT3G21670	24.4156	1.57715e-11	1.80535	0.206534
AT3G21750	1.60944	0.00401186	1.44175	0.0582641
AT3G21870	1.52478	3.18201e-08	0.937271	0.346027
AT3G22120	0.603877	0.00341302	1.3032	0.11374
AT3G22240	0.647275	0.00137938	0.735097	0.0190555
AT3G22370	0.627092	6.34833e-05	1.70575	3.41667e-06
AT3G22400	1.75377	0.00264014	0.708248	0.0866279
AT3G22620	0.616711	0.00206228	1.48953	0.0163562
AT3G22740	2.23561	0.000238233	2.09166	5.68604e-05
AT3G22750	0.614996	4.73952e-09	0.65813	5.7999e-08
AT3G22800	0.476539	1.88846e-12	0.86738	0.126554
AT3G22830	5.70829	0.000856294	9.67274	6.09295e-06
AT3G22886	0.424303	0.000197804	1.0901	0.748137
AT3G22930	2.08427	5.06207e-07	1.85189	3.07705e-05
AT3G23020	0.535001	7.10462e-15	0.397498	7.66014e-27
AT3G23090	1.82993	2.50518e-10	0.795649	0.0470816
AT3G23170	0.362104	1.78221e-08	2.3241	1.13623e-07
AT3G23210	0.501722	0.00679372	0.568414	0.0640825
AT3G23250	0.592709	0.00166278	1.05464	0.68907
AT3G23470	1.73601	0.000130164	0.938725	0.654844
AT3G23560	0.524277	7.9925e-17	0.684069	1.05253e-06
AT3G23570	0.527876	7.62021e-10	0.462028	7.12523e-15
AT3G23630	0.0872648	7.09438e-07	0.336834	0.00478153
AT3G23640	0.549097	3.86602e-15	0.727661	4.05022e-05
AT3G23740	2.60465	6.70102e-06	2.38298	0.000297507
AT3G23750	2.02896	4.35035e-19	1.45459	2.71978e-06
AT3G23805	2.45829	4.91926e-10	1.12498	0.498895
AT3G23810	0.623005	0.00747802	0.753786	0.131628
AT3G23820	1.8616	9.35726e-23	1.53168	1.69436e-11
AT3G23860	2.12051	0.000236061	0.805408	0.323535
AT3G23870	5.21024	3.35584e-18	1.11006	0.706949
AT3G23920	1.77595	4.80136e-16	1.2619	0.000829607
AT3G23990	0.636631	2.14207e-10	1.26954	0.000652048
AT3G24310	0.380419	0.00576351	1.03318	0.966023
AT3G24450	2.30932	4.49723e-16	1.17415	0.224437
AT3G24460	0.609682	1.32262e-05	1.09253	0.427046
AT3G24530	1.68154	6.49553e-07	1.23039	0.0420029
AT3G24715	3.02039	1.45433e-10	1.35451	0.141249
AT3G24750	3.36773	0.00365589	1.97199	0.146938
AT3G24840	1.70711	3.21679e-07	1.10507	0.362509
AT3G25110	2.04542	6.03449e-07	1.23003	0.239232
AT3G25600	2.26101	3.20846e-18	1.43651	4.61013e-05
AT3G25740	0.555085	8.38838e-06	0.541196	5.02594e-05
AT3G25900	4.16549	3.65779e-82	1.79081	5.98756e-15
AT3G25950	2.58606	0.000327562	1.68328	0.0573176
AT3G26060	1.52098	0.00243367	1.39199	0.0215035
AT3G26080	1.7004	7.40084e-06	1.20387	0.111145
AT3G26310	2.48218	1.3101e-05	2.70387	0.00133083
AT3G26445	0.524765	0.00283992	0.735393	0.523539
AT3G26450	0.657195	3.61775e-07	0.829847	0.0297114
AT3G26630	1.61568	8.5457e-07	1.04985	0.619705
AT3G26740	1.90041	5.48999e-14	0.815829	0.0134819
AT3G26760	2.02781	3.0185e-14	1.34481	0.00299963
AT3G26815	0.396123	0.00501308	0.224629	0.0101253
AT3G26980	2.06732	7.42705e-08	1.95906	3.61874e-07
AT3G27020	1.59133	4.64087e-06	1.02645	0.752766
AT3G27030	1.68611	2.01838e-07	1.09536	0.404135
AT3G27050	1.59907	0.000169443	0.83737	0.155409
AT3G27220	0.342662	1.57542e-05	2.13407	0.00125247
AT3G27500	3.81418	1.66551e-10	2.79124	2.16591e-05
AT3G27580	1.78917	2.12492e-12	0.734574	0.000346027
AT3G27690	2.15798	6.73693e-05	0.776818	0.175139
AT3G27870	0.575998	2.19065e-07	0.836166	0.0889137
AT3G28130	2.45785	9.15536e-07	1.78545	0.0019139
AT3G28160	0.591252	0.00199449	1.03817	0.816856
AT3G28180	2.10725	2.50562e-20	1.34249	0.000237583
AT3G28200	2.81913	9.55512e-44	1.52852	1.61116e-08
AT3G28315	0.189126	0.00174365	2.57878	0.881924
AT3G28340	2.54242	3.20561e-23	1.34804	0.000768338
AT3G28857	3.60184	7.19105e-14	0	1
AT3G29060	5.03607	0.0017456	NA	NA
AT3G29160	1.93338	1.34208e-20	1.09401	0.203273
AT3G29360	1.6674	1.16623e-11	1.10167	0.170803
AT3G29370	2.09786	1.33979e-19	0.612581	3.26841e-06
AT3G29410	0.0862675	0.000291144	0.93401	0.948868
AT3G29575	1.85311	1.9744e-18	1.03151	0.662778
AT3G29670	1.92845	0.0081687	1.49631	0.0843776
AT3G29770	1.89017	3.64746e-08	1.126	0.328359
AT3G30122	0.654001	0.00155357	0.735213	0.0324076
AT3G30180	0.0104576	0	0.0133881	0
AT3G30775	3.11461	5.74717e-76	1.18711	0.00356742
AT3G32980	0.599148	2.63949e-16	0.704731	2.24948e-08
AT3G42180	0.375067	0.000104057	0.620391	0.0319376
AT3G42670	0.608204	6.26907e-05	0.636619	0.000384062
AT3G42800	5.57358	5.9731e-11	3.6405	0.105511
AT3G43270	1.54066	1.86821e-07	1.01362	0.897894
AT3G43430	3.52575	6.27669e-47	1.29592	0.0036688
AT3G43720	3.71818	1.56585e-69	1.35275	8.1424e-05
AT3G43920	0.660163	0.000977536	0.828214	0.13604
AT3G44320	0.525205	1.09031e-10	0.83639	0.0922813
AT3G44326	0.449441	0.000412823	0.760018	0.292401
AT3G44610	0.500179	1.37661e-09	0.736535	0.00648404
AT3G44735	1.55991	2.59975e-07	1.24468	0.0131867
AT3G44970	2.63118	0.00025271	1.40411	0.103133
AT3G44990	1.69975	1.05064e-10	0.832236	0.0208828
AT3G45010	1.96083	2.25421e-15	1.36014	0.000404068
AT3G45210	0.462971	8.04276e-05	0.649785	0.031136
AT3G45230	1.61079	0.000268939	0.994277	0.964504
AT3G45270	0.0415806	2.1562e-05	0	1
AT3G45280	0.279746	1.50269e-08	0.716055	0.265142
AT3G45530	3.07613	2.67082e-11	1.78556	0.000631183
AT3G45610	1.61534	0.00327395	1.13643	0.456102
AT3G45700	2.91061	5.66221e-16	0.99791	1
AT3G45730	2.74846	5.56274e-45	1.05522	0.46677
AT3G45960	2.82434	2.21312e-05	2.50078	0.000720558
AT3G45970	3.83698	3.10774e-87	1.16205	0.0242564
AT3G46490	0.58902	0.00914314	1.32153	0.328645
AT3G46540	0.62911	5.47998e-05	1.09882	0.371925
AT3G46600	1.74382	1.99899e-06	1.37566	0.00465658
AT3G46670	1.99347	0.0010279	1.18119	0.481603
AT3G46690	1.51621	1.50039e-06	1.06687	0.443794
AT3G46700	0.656006	1.42586e-07	0.698932	1.34691e-05
AT3G47220	1.86485	4.71474e-05	1.6179	0.00531226
AT3G47400	1.78438	0.00146825	2.02246	0.000416458
AT3G47430	1.65863	8.68396e-05	1.24163	0.127261
AT3G47690	1.7645	1.00626e-05	1.09213	0.525986
AT3G47720	0.275104	0.000491832	12.098	2.54647e-34
AT3G48250	0.419268	0.0002108	0.962853	0.892442
AT3G48260	1.57951	3.18385e-09	0.995096	0.984821
AT3G48390	2.34425	2.73981e-27	1.19725	0.0315204
AT3G48450	0.623666	0.0020302	1.42004	0.0078366
AT3G48590	1.55283	7.07844e-07	0.933787	0.44443
AT3G48610	0.587909	1.32613e-05	0.649757	0.00209792
AT3G48660	0.153082	0.00944427	1.09076	0.980008
AT3G48670	0.661414	7.50523e-06	1.31409	0.00326251
AT3G48920	0.526362	0.00253989	0.529182	0.00251625
AT3G48940	7.08957	2.59529e-07	0.877675	1
AT3G48970	0.238083	1.72755e-40	0.615666	0.000270627
AT3G49220	2.79359	3.53758e-11	1.05935	0.72521
AT3G49380	0.444188	0.000261195	0.576756	0.0156217
AT3G49550	0.560265	1.23544e-05	0.822193	0.139606
AT3G49630	0.049847	3.38102e-08	0.329385	0.0139929
AT3G49845	3.33592	5.23356e-13	0.911074	0.675247
AT3G49860	1.54475	0.000262352	0.945446	0.623513
AT3G49950	0.549026	0.000524386	0.764994	0.137162
AT3G49970	0.512492	1.76564e-06	0.70307	0.00614884
AT3G50070	0.516271	1.49445e-08	0.606551	2.43694e-05
AT3G50110	1.59583	0.00282079	1.39718	0.0306787
AT3G50120	3.02969	0.000269638	0.29353	0.0334408
AT3G50130	2.56804	0.00212693	0.67353	0.301816
AT3G50140	4.32414	0.000115237	1.28107	0.586255
AT3G50260	2.39649	1.77242e-18	1.49715	4.4187e-05
AT3G50270	1.85151	9.88828e-05	1.27006	0.151328
AT3G50350	2.90958	3.26723e-17	0.734713	0.028889
AT3G50560	2.45109	8.27484e-37	1.04313	0.51438
AT3G50570	3.17448	2.70783e-09	0.789088	0.208108
AT3G50630	0.250373	1.89914e-35	0.352814	5.84491e-22
AT3G50640	3.02523	1.08716e-10	2.51051	2.76617e-05
AT3G50650	2.9686	2.2441e-28	0.947139	0.643184
AT3G50660	0.0319564	8.76787e-71	0.0276303	1.50878e-74
AT3G50780	2.13518	2.80784e-19	1.11047	0.231976
AT3G50800	0.218644	2.98359e-12	0.634395	0.0299266
AT3G50820	2.14632	6.91442e-05	1.14469	0.472377
AT3G50830	1.97329	4.11965e-23	1.14297	0.0552354
AT3G50870	0.287034	0.000725614	0.765616	0.522154
AT3G51325	2.6658	0.00299603	0.78079	0.503881
AT3G51400	0.0723634	6.80524e-97	0.167245	7.6662e-60
AT3G51430	0.549463	2.79916e-06	0.644717	0.000455443
AT3G51550	1.52473	7.88119e-11	1.14436	0.0386641
AT3G51600	0.561678	2.03867e-20	0.825349	0.00178484
AT3G51660	2.13444	0.000242677	1.53516	0.0391605
AT3G51895	0.59989	3.25851e-08	0.71968	0.000936154
AT3G51930	3.2433	2.95196e-06	1.09915	0.922243
AT3G51950	0.525255	1.82362e-22	0.669675	1.69657e-09
AT3G51970	3.81692	1.59571e-11	1.28057	0.238563
AT3G52110	1.52015	0.00874865	1.08745	0.642394
AT3G52340	0.631574	6.84159e-12	0.837896	0.00711209
AT3G52370	0.483111	0.00196338	1.21328	0.51796
AT3G52480	1.50903	1.90613e-05	1.35026	0.00216151
AT3G52720	0.341567	1.42169e-05	1.4016	0.338138
AT3G52790	0.159003	1.23874e-06	0.452722	0.0743238
AT3G52840	5.32408	9.24987e-32	1.23744	0.123101
AT3G52920	1.56079	8.1371e-09	0.841843	0.0344208
AT3G52940	2.31942	4.65923e-16	1.10059	0.381627
AT3G53000	1.79169	4.08943e-09	0.839766	0.0946661
AT3G53010	8.00678	1.72659e-12	0.63491	0.575361
AT3G53230	0.61535	2.43141e-06	1.16985	0.125321
AT3G53250	0.197479	1.87994e-11	0.253055	1.41674e-06
AT3G53260	0.573627	5.4747e-18	0.831236	0.0036451
AT3G53420	4.43345	6.95938e-126	2.09289	3.223e-33
AT3G53530	3.20082	3.24328e-12	1.15749	0.414939
AT3G53620	7.69581	3.31591e-108	1.21692	0.0211844
AT3G53800	1.9774	4.20954e-13	0.791817	0.0116523
AT3G53980	2.39771	6.03207e-08	1.06878	1
AT3G54000	2.86742	1.93162e-17	1.28086	0.0583368
AT3G54020	3.00096	1.94952e-24	1.08717	0.408074
AT3G54030	2.35713	9.98016e-23	1.21571	0.020464
AT3G54040	0.508636	3.2062e-07	0.641098	0.000359436
AT3G54120	2.63352	9.21271e-11	1.1256	0.509741
AT3G54450	Inf	0.000329046	Inf	0.924473
AT3G54510	1.70252	5.93045e-11	1.50682	2.11475e-05
AT3G54560	1.56175	0.000941055	1.11896	0.472155
AT3G54770	3.22426	3.89844e-21	0.723312	0.115356
AT3G54820	2.22687	3.30345e-08	2.13837	6.5728e-07
AT3G54830	5.53566	8.66471e-18	0.854456	0.8327
AT3G54880	2.95551	2.94742e-61	1.17779	0.0108531
AT3G54890	1.81427	1.71006e-06	1.04404	0.744366
AT3G54920	2.18444	4.74132e-24	1.18983	0.0348306
AT3G54930	1.61466	0.00647444	1.0979	0.642745
AT3G55150	1.90815	0.0012728	1.3515	0.115977
AT3G55230	0.408441	9.89573e-21	0.77318	0.0111889
AT3G55340	0.65384	0.00147382	1.04468	0.76087
AT3G55420	1.63219	2.06381e-05	1.1449	0.328042
AT3G55500	0.455736	0.000106488	0.611525	0.0173803
AT3G55510	0.615852	0.00178273	1.08312	0.644459
AT3G55630	1.63467	0.000577728	1.26912	0.129029
AT3G55840	14.4325	1.13702e-121	2.11082	2.0412e-12
AT3G55880	3.47523	8.68021e-35	1.27915	0.0156752
AT3G55940	25.4802	6.03457e-44	0.442566	0.100525
AT3G55950	2.72475	5.6219e-20	1.25653	0.0371981
AT3G55970	1.9104	1.4566e-07	1.24688	0.0546851
AT3G56000	5.71415	1.48395e-48	1.61644	0.000178451
AT3G56050	1.77736	5.21918e-16	1.10699	0.148222
AT3G56200	0.625556	1.98419e-06	0.526962	1.4272e-10
AT3G56220	0.325294	0.000269074	0.179657	3.3943e-05
AT3G56230	3.03099	0.000204291	1.52941	0.164098
AT3G56400	3.8534	0.000710783	1.73387	0.136825
AT3G56480	1.69225	1.85032e-12	1.08378	0.332559
AT3G56800	1.59441	9.42798e-13	1.21402	0.00291549
AT3G56880	1.60026	2.0943e-08	1.39214	4.07009e-05
AT3G56930	1.86096	1.12879e-13	1.18031	0.0488855
AT3G57010	0.136691	2.79586e-15	0.198879	8.32694e-09
AT3G57070	1.55194	2.86418e-05	1.1961	0.0734087
AT3G57130	0.259638	0.0077003	1.28134	0.629211
AT3G57450	1.92875	0.00121341	1.79755	0.00318583
AT3G57520	2.0599	6.6082e-09	0.8383	0.171829
AT3G57780	1.81688	8.64428e-12	1.41324	3.81168e-05
AT3G57880	0.419054	4.39903e-33	0.775577	0.000434219
AT3G57940	0.535367	2.25552e-05	0.901068	0.465626
AT3G57950	2.74761	0.00129068	2.85814	0.00559537
AT3G57970	0.626589	3.45154e-05	0.661639	0.000322099
AT3G57980	0.537826	3.34032e-08	0.776289	0.025085
AT3G58120	2.3204	2.52914e-17	0.986789	0.868249
AT3G58620	1.81875	2.62541e-14	0.937358	0.448944
AT3G58660	0.657237	4.34908e-06	1.02553	0.790119
AT3G58720	0.499899	4.86328e-08	0.635361	0.000380962
AT3G58790	1.61611	7.37151e-07	1.81999	2.31987e-10
AT3G58850	4.16019	1.1762e-39	2.22908	5.44676e-08
AT3G59060	2.0018	2.40297e-22	1.41036	8.76549e-07
AT3G59110	1.85428	2.50274e-15	1.08447	0.305588
AT3G59120	2.01684	0.00421582	1.43515	0.147686
AT3G59130	2.67868	0.00121533	1.68822	0.142382
AT3G59220	0.6052	0.00667996	0.611826	0.00868883
AT3G59350	3.65314	1.55685e-53	1.37502	0.000120268
AT3G59370	12.8487	7.10136e-35	3.19073	0.00355289
AT3G59480	1.92976	0.000338777	1.23786	0.282861
AT3G59690	2.3666	4.66069e-05	0.820389	0.468091
AT3G59710	0.589584	0.00103959	0.708151	0.0439199
AT3G59740	0.468671	0.00723701	1.07053	0.819899
AT3G59750	0.621767	0.0081022	0.773677	0.124155
AT3G59880	1.59863	0.00871345	1.69378	0.000817387
AT3G59930	0.463224	1.47958e-26	0.666306	7.30644e-09
AT3G60050	0.66357	0.0068734	0.805338	0.161728
AT3G60080	0.629063	1.15734e-07	0.815115	0.0250637
AT3G60140	3.20345	8.388e-50	0.964454	0.661504
AT3G60200	0.659308	2.32833e-06	0.482725	1.98009e-16
AT3G60320	0.618614	4.55068e-08	1.0343	0.694946
AT3G60530	0.621651	2.04453e-06	1.03721	0.741577
AT3G60550	0.611368	0.000291973	0.560945	0.000434736
AT3G60647	20.3322	2.94866e-06	NA	NA
AT3G60650	31.9907	3.76601e-31	0	1
AT3G60690	0.632438	0.000798683	0.461796	3.88223e-10
AT3G60700	4.66041	0.00675907	1.43446	0.82459
AT3G60930	2.09731	0.000349976	2.0035	0.00166672
AT3G61028	1.81819	0.00118954	1.37575	0.038327
AT3G61060	1.64412	1.14736e-09	1.41133	2.54044e-05
AT3G61190	2.75675	4.57146e-06	1.53763	0.0364635
AT3G61198	1.7036	9.06911e-05	1.43252	0.00544452
AT3G61210	1.65782	0.000660203	1.46887	0.0112047
AT3G61260	1.95379	1.257e-27	1.0786	0.219594
AT3G61410	1.75204	0.00652773	1.03585	0.96069
AT3G61430	2.37447	1.27394e-45	0.921268	0.15479
AT3G61460	0.541604	5.49952e-16	0.444559	7.38547e-25
AT3G61490	1.722	1.49445e-05	0.763792	0.0530976
AT3G61550	1.72434	5.56054e-05	1.5218	0.00710521
AT3G61680	1.80705	1.44742e-06	0.329836	2.39359e-09
AT3G61890	1.95947	1.85076e-07	0.687396	0.00327226
AT3G62060	1.51096	0.00207913	0.717574	0.024531
AT3G62070	4.53218	3.64574e-16	0.823297	0.452934
AT3G62090	0.498481	1.30529e-19	0.629832	8.16518e-10
AT3G62550	1.78808	1.51599e-06	0.842649	0.146504
AT3G62570	4.16769	8.95071e-38	1.26602	0.0679143
AT3G62660	2.4219	1.94561e-30	0.843953	0.0417181
AT3G62860	1.57276	4.9193e-11	1.08658	0.217434
AT3G62930	4.46201	4.0714e-09	0.769361	0.318406
AT3G62950	10.3048	2.04018e-42	1.34841	0.0811345
AT3G63088	0.331193	0.0009946	0.269176	0.00185621
AT3G63090	0.616311	0.00282993	0.963951	0.804752
AT3G63110	0.212115	6.93308e-22	0.532861	7.01113e-05
AT3G63120	1.72827	2.19897e-10	0.780131	0.00826097
AT3G63170	0.652592	0.000228004	0.847506	0.182488
AT3G63200	0.375837	1.16157e-15	0.414174	9.36789e-11
AT3G63350	3.16148	2.09818e-16	4.04004	4.97723e-21
AT3G63380	0.432029	7.27233e-05	0.46356	0.000265856
AT3G63470	5.23383	1.27373e-29	1.33777	0.140952
AT4G00040	0.654817	1.48857e-07	0.840723	0.030969
AT4G00300	1.78901	1.92211e-15	1.19483	0.014649
AT4G00360	3.43642	4.63835e-14	2.18101	9.85627e-07
AT4G00370	1.51582	3.44733e-08	1.07747	0.366805
AT4G00380	0.562278	0.000122436	0.972983	0.890916
AT4G00400	2.67262	6.57592e-31	1.71919	1.19183e-07
AT4G00430	4.34797	3.3942e-48	1.77983	6.5011e-08
AT4G00460	0.551122	0.00681194	0.609224	0.0259945
AT4G00670	0.203889	2.56942e-05	0.845195	0.780865
AT4G00730	0.655841	3.17126e-10	0.745007	1.34526e-05
AT4G00780	0.659349	1.79115e-06	0.993606	0.964258
AT4G00880	0.112697	6.58502e-07	0.531182	0.0932545
AT4G01026	1.91967	9.59018e-14	1.33963	0.000463004
AT4G01070	0.466749	2.69044e-07	0.534702	4.6663e-05
AT4G01140	16.0611	9.4892e-76	1.07456	0.744929
AT4G01440	0.597865	0.000384865	0.668538	0.00938518
AT4G01460	1.88078	3.72708e-05	0.989048	0.991543
AT4G01510	0.610385	0.000342839	0.644427	0.00173407
AT4G01575	5.07572	5.19371e-08	0.992458	1
AT4G01680	0.0211365	3.56134e-217	0.0249064	1.42248e-165
AT4G01700	0.621445	1.06229e-09	0.734735	3.5909e-05
AT4G01740	0.650311	0.000393623	1.04863	0.716141
AT4G01870	0.229725	1.27861e-84	0.22271	3.84602e-85
AT4G01950	9.59958	6.83766e-08	1.60479	0.191668
AT4G02075	1.91625	1.81368e-09	1.2566	0.0430501
AT4G02090	0.4679	4.2756e-06	0.683689	0.037787
AT4G02130	6.25753	1.32251e-100	1.10036	0.332931
AT4G02160	1.79569	0.00840281	0.759783	0.131429
AT4G02170	2.29531	0.000196409	1.7917	0.000634449
AT4G02270	1.51711	0.00196055	1.09333	0.486311
AT4G02280	0.626538	6.07113e-08	0.672532	2.08552e-06
AT4G02380	0.356236	2.83275e-24	1.2303	0.0352778
AT4G02400	0.64816	1.22336e-06	0.900735	0.245032
AT4G02520	0.483776	9.8223e-32	0.721928	8.67401e-08
AT4G02710	0.65794	0.000291065	0.982899	0.883999
AT4G02860	0.661793	1.36795e-07	0.820912	0.0122768
AT4G02970	0.658905	3.32758e-06	1.21358	0.0269291
AT4G03070	2.60288	2.47292e-06	1.42947	0.448405
AT4G03110	1.71216	7.09224e-15	1.30094	0.000137608
AT4G03210	0.289312	2.85232e-45	0.707485	2.98693e-05
AT4G03340	0.505153	6.3637e-08	0.655152	0.00104076
AT4G03390	1.56824	1.11504e-11	0.872015	0.0436562
AT4G03400	1.82377	1.19591e-06	1.05575	0.678337
AT4G03415	1.56567	1.46791e-10	1.35952	1.00708e-05
AT4G03420	2.23681	2.31048e-15	1.58387	6.68544e-06
AT4G03510	1.67323	3.85728e-15	1.17526	0.0111349
AT4G04460	1.51192	0.00139553	1.12523	0.472441
AT4G04630	2.06291	2.32668e-12	1.4837	0.000334389
AT4G04745	3.22995	1.04374e-19	1.63313	0.000344297
AT4G04940	0.52132	5.1172e-06	1.13245	0.369495
AT4G05120	1.57826	3.57712e-07	1.48523	5.00739e-06
AT4G05330	1.58342	4.1281e-06	1.30023	0.0218003
AT4G05390	0.631606	3.39088e-07	0.771523	0.00435949
AT4G05410	0.59481	4.64212e-06	0.903209	0.378142
AT4G06534	2.77935	1.51384e-05	1.23877	0.482939
AT4G06536	3.20096	0.00108453	1.4301	0.437231
AT4G06744	0.607252	9.79985e-07	0.515517	2.14442e-10
AT4G07820	0.617855	5.06677e-05	0.690303	0.00350706
AT4G07960	2.53869	3.93894e-14	1.24885	0.0538882
AT4G08040	0	1.80939e-75	0.0200857	1.48939e-34
AT4G08620	49.5344	4.64622e-08	8.82677	0.000239536
AT4G08685	2.20449	2.72643e-19	0.91729	0.438791
AT4G08770	0.501278	1.20869e-19	0.90587	0.156657
AT4G08780	0.544954	2.26325e-05	0.769781	0.0201749
AT4G08870	0.586687	9.89714e-08	0.917144	0.394561
AT4G09030	1.94141	3.07762e-06	0.924701	0.631215
AT4G09160	1.78508	1.47058e-14	0.976028	0.738316
AT4G09460	2.29382	3.77553e-24	1.44243	1.27742e-05
AT4G09530	3.68295	0.00093244	2.67739	0.0310809
AT4G09630	1.53721	3.10703e-09	1.16815	0.0374074
AT4G09760	1.82855	0.00213046	1.20694	0.353184
AT4G09890	5.12695	5.63521e-95	1.03015	0.854956
AT4G10020	1.73562	7.12315e-05	1.93668	0.00097098
AT4G10150	4.77822	0.000295324	1.74743	0.854339
AT4G10160	59.8903	2.60065e-14	NA	NA
AT4G10250	0.547468	0.00977251	58.165	4.32452e-81
AT4G10270	0.337495	0.00355595	2.07713	0.034282
AT4G10390	0.487185	0.000230205	0.776275	0.169727
AT4G10840	1.79685	4.72898e-21	1.08204	0.211424
AT4G10910	4.16817	0.00039141	1.15489	0.833323
AT4G11020	Inf	1.58681e-10	NA	NA
AT4G11190	0.214563	0.00286831	0.772952	0.676452
AT4G11211	1.69545	0.00161471	1.15247	0.519345
AT4G11280	2.21547	2.53437e-07	1.92063	1.42117e-05
AT4G11610	0.657905	4.99024e-11	0.784258	9.66066e-05
AT4G11650	0.582952	7.81535e-07	0.414804	2.096e-15
AT4G11780	3.60008	0.00504161	1.19316	0.990643
AT4G11820	1.75601	9.52891e-07	0.713462	0.00438106
AT4G11990	0.426546	0.00995102	0.769046	0.481786
AT4G12290	0.653223	0.00189625	0.437555	5.63102e-11
AT4G12330	2.42811	0.000313306	1.46862	0.229011
AT4G12390	0.606388	0.000666782	0.703975	0.029537
AT4G12410	0.23509	2.98978e-08	1.43547	0.278265
AT4G12420	2.94674	1.58627e-66	1.07034	0.266328
AT4G12470	0.53154	1.99781e-23	0.588735	1.34507e-17
AT4G12480	0.595968	1.68459e-07	0.504367	9.39524e-12
AT4G12690	1.90265	8.27303e-14	1.08037	0.434509
AT4G12720	2.59468	0.00431171	2.04794	0.0267115
AT4G12730	3.54342	1.19851e-84	0.86711	0.0346974
AT4G12980	2.41249	2.69249e-10	1.19198	0.25414
AT4G13340	1.83213	4.05267e-21	1.1613	0.0165879
AT4G13390	0.458769	1.62372e-07	0.751506	0.0626273
AT4G13395	0.60093	4.47991e-07	0.979449	0.866188
AT4G13420	0.183707	0.00221727	0.0961139	1.76271e-08
AT4G13580	0.420767	3.92802e-13	0.658721	0.00242207
AT4G13620	2.39103	7.02076e-10	1.46187	0.0316138
AT4G13710	1.98943	0.00935415	1.66875	0.107855
AT4G13750	0.663359	2.61828e-05	0.900973	0.298205
AT4G13790	11.4349	6.01706e-17	1.17556	1
AT4G13890	3.72485	7.50793e-06	2.32886	0.000826164
AT4G14010	0.642815	7.28795e-10	0.586709	2.45583e-13
AT4G14020	0.58911	0.000133035	0.801839	0.108774
AT4G14130	0.170817	3.63714e-173	0.40915	1.47601e-49
AT4G14140	0.206159	6.06277e-65	0.538722	5.19431e-15
AT4G14290	2.31863	3.43213e-12	0.935841	0.662871
AT4G14370	2.33337	0.00230212	1.88123	0.0162198
AT4G14380	2.78243	1.90594e-09	0.83555	0.47045
AT4G14490	2.04484	1.47516e-05	0.893511	0.466031
AT4G14500	2.19641	1.78113e-28	1.02437	0.788188
AT4G14550	2.04273	1.089e-14	0.984845	0.882197
AT4G14640	22.8497	1.34278e-31	2.48542	0.000743663
AT4G14680	2.114	0.00269245	0.920104	0.800515
AT4G14740	1.78263	3.82598e-10	1.41526	0.000469427
AT4G14746	2.23191	1.31081e-19	1.81766	5.2011e-12
AT4G14760	0.661918	2.68397e-06	1.13919	0.151784
AT4G15120	0.5843	0.00135968	0.916467	0.603155
AT4G15160	0.596507	8.98493e-07	0.695067	0.00807533
AT4G15290	Inf	0.000649838	9.62763	0.0756582
AT4G15350	0.427821	0.00862323	0.737434	0.237253
AT4G15390	0.619031	1.61237e-07	0.859279	0.0852746
AT4G15393	0.448604	0.00512849	0.719067	0.302653
AT4G15530	1.67098	2.50996e-16	0.943882	0.384851
AT4G15550	0.582276	4.23282e-17	0.710012	7.10198e-08
AT4G15630	2.76067	1.42958e-14	1.48967	0.00640763
AT4G15660	0.442705	0.00425052	1.02334	1
AT4G15700	0.517777	0.000166687	0.876596	0.39088
AT4G15770	0.661683	4.05229e-06	1.15671	0.0935944
AT4G15800	2.17814	7.00856e-21	1.04676	0.580424
AT4G15960	0.5989	1.46722e-05	0.950706	0.722901
AT4G15990	3.08341	5.25965e-39	1.4952	1.94927e-06
AT4G16000	4.11203	2.91469e-51	1.63283	2.88748e-07
AT4G16140	0.523949	7.15076e-11	1.05821	0.576037
AT4G16260	0.649635	3.70923e-07	0.40768	2.61408e-28
AT4G16370	0.605081	1.71581e-10	0.784236	0.00178552
AT4G16480	1.66585	2.7817e-08	1.11268	0.259811
AT4G16515	12.302	1.28708e-165	3.79945	1.38731e-06
AT4G16790	1.63152	5.15237e-06	1.2174	0.123756
AT4G17030	4.56998	1.25812e-45	0.913351	0.324868
AT4G17090	3.91849	0.00336434	2.24836	0.0576621
AT4G17170	2.18048	2.42893e-33	1.17988	0.0137349
AT4G17215	0.533416	0.00538058	0.771206	0.238847
AT4G17220	3.05862	8.30115e-13	1.01996	0.950685
AT4G17260	0.507302	1.20288e-06	1.66472	8.23776e-05
AT4G17280	2.03818	1.04939e-08	1.0031	0.955239
AT4G17340	3.31245	1.88725e-28	1.29406	0.0552751
AT4G17350	1.99402	1.11466e-06	0.833561	0.259204
AT4G17480	3.11779	5.4558e-05	0.938656	0.864569
AT4G17870	1.5447	4.34845e-06	1.33225	0.00265302
AT4G18280	3.70842	3.90557e-39	1.74061	5.52325e-08
AT4G18340	2.40288	3.52939e-27	1.17238	0.0406168
AT4G18360	0.483125	5.73235e-12	0.539392	5.68916e-09
AT4G18390	0.627656	8.01535e-06	0.880803	0.248686
AT4G18430	0.52262	3.71657e-05	0.861764	0.302457
AT4G18440	0.60503	0.000421155	0.79013	0.10958
AT4G18470	0.431074	0.00106057	0.556119	0.0247117
AT4G18760	1.78066	1.88528e-08	0.863954	0.204876
AT4G18830	2.0581	3.57497e-05	1.90771	0.000215257
AT4G18910	1.55801	7.28577e-09	1.04123	0.602396
AT4G18970	4.12033	4.56098e-65	1.17894	0.0583368
AT4G19120	1.90415	3.22336e-19	0.961899	0.670932
AT4G19170	1.58925	4.5016e-05	0.831746	0.112962
AT4G19200	1.51416	2.19153e-11	1.21416	0.00172678
AT4G19460	0.491195	3.42437e-05	0.978488	0.87824
AT4G19512	9.24427	7.83244e-05	2.4816	0.0816877
AT4G19840	0.580442	1.64488e-14	0.854024	0.0223741
AT4G19960	1.78798	0.000176115	1.46873	0.0231315
AT4G19980	2.32223	0.00638484	3.4946	6.43525e-05
AT4G20260	2.151	3.6878e-36	0.804681	0.000388745
AT4G20320	3.04164	9.81169e-56	1.21294	0.00660341
AT4G20362	7.53426	1.2049e-60	1.30106	0.0790342
AT4G20870	2.73519	9.27762e-44	1.36624	9.63123e-05
AT4G20880	1.6722	3.74861e-10	1.28331	0.00351934
AT4G20940	0.532368	2.76612e-07	0.857787	0.254476
AT4G21140	0.557126	0.00114002	0.841009	0.331601
AT4G21490	1.75118	0.00723357	0.456979	0.00156451
AT4G21500	2.21393	9.14752e-07	1.21947	0.240157
AT4G21510	1.72956	2.59189e-08	1.32605	0.00566683
AT4G21620	1.61851	7.34042e-12	1.34919	1.6814e-05
AT4G21730	2.00885	0.000356069	1.03559	0.955124
AT4G21740	4.83384	6.04983e-29	1.67158	0.00203897
AT4G21745	70.8049	5.63046e-33	1.35379	0.766145
AT4G21850	5.71848	2.60275e-67	1.38711	0.000437069
AT4G21970	2.42657	9.23916e-05	0.846574	0.626689
AT4G21990	0.469053	1.46757e-07	0.72578	0.0262442
AT4G22010	1.9127	9.44971e-19	1.2134	0.0120979
AT4G22020	0.565249	0.00784082	1.14916	0.391163
AT4G22070	0.471134	1.04623e-08	0.549843	1.45014e-05
AT4G22217	0.0356786	0.00029042	0	0.00185047
AT4G22380	0.665532	0.00301844	0.849024	0.233731
AT4G22470	0.287489	2.35228e-17	0.618061	0.000750048
AT4G22485	0.366391	3.29025e-15	0.458526	3.69915e-08
AT4G22505	0.277601	3.54426e-15	0.589025	0.0176999
AT4G22513	0.440893	0.000158238	0.409336	0.00695449
AT4G22520	0.399207	0.000899001	0.513599	0.0746504
AT4G22530	0.47763	2.82846e-08	0.662354	0.00128249
AT4G22666	3.13135	7.11384e-12	2.3057	4.22664e-07
AT4G22730	1.78873	0.000882917	1.70184	0.0120354
AT4G22770	1.55428	0.000517248	1.43229	0.00594118
AT4G22780	2.67348	1.04468e-08	3.20107	1.60386e-11
AT4G22790	2.20411	9.09609e-05	1.9653	0.00178494
AT4G22810	1.90413	6.54987e-13	1.13052	0.254624
AT4G22840	0.50972	9.45943e-05	0.453819	9.99572e-05
AT4G22890	1.52356	1.10051e-07	1.23484	0.0110773
AT4G23010	0.624166	0.000170383	1.0706	0.518271
AT4G23030	1.81229	2.4595e-08	1.64912	4.35186e-06
AT4G23070	12.1087	2.8219e-17	1.32065	0.361529
AT4G23180	1.7917	3.24727e-07	2.27802	6.43375e-14
AT4G23190	1.72378	0.00186132	1.5974	0.00495852
AT4G23220	3.43665	0.000664678	2.96987	5.16829e-06
AT4G23493	0.489937	0.00297702	2.44028	0.00030608
AT4G23730	1.57277	3.41055e-09	1.14834	0.0753692
AT4G23750	0.570499	5.17592e-06	0.757238	0.0306385
AT4G23870	4.10423	6.85677e-75	1.49014	2.67935e-05
AT4G24050	1.95852	2.0117e-22	1.20042	0.0088991
AT4G24110	0.356797	0.000947012	1.89486	0.0261226
AT4G24120	0.608511	0.000562881	0.963226	0.859071
AT4G24180	5.79588	3.43176e-30	1.00628	1
AT4G24230	2.34234	3.80186e-43	1.36603	3.41947e-07
AT4G24275	2.56725	3.2581e-24	1.10759	0.304579
AT4G24415	0.539722	6.8912e-05	2.31823	8.88542e-10
AT4G24510	1.83058	1.53997e-19	1.29496	0.00014148
AT4G24700	2.81727	0.0064658	0.786555	0.703032
AT4G24760	1.6775	6.65694e-11	1.03281	0.711876
AT4G24780	1.72927	6.58488e-05	0.678005	0.0423634
AT4G24800	1.55014	1.61738e-11	1.13549	0.0576309
AT4G24805	1.73605	5.15712e-11	1.02381	0.770109
AT4G24960	2.1027	4.37776e-16	1.35326	0.000889412
AT4G25160	0.387177	2.87055e-05	0.561685	0.0162972
AT4G25200	0.456299	0.00873853	61.8387	1.04075e-179
AT4G25250	59.6942	6.51207e-07	1.11864	1
AT4G25260	3.599	2.18778e-75	0.934021	0.369656
AT4G25270	1.54527	0.000419697	0.967527	0.78624
AT4G25280	2.00979	5.87333e-13	0.820696	0.07551
AT4G25310	0.400312	0.00118566	0.760582	0.223215
AT4G25350	2.69439	5.04033e-08	1.28619	0.192737
AT4G25420	13.9145	1.51824e-17	1.19316	1
AT4G25620	0.6477	7.33787e-10	0.543819	1.31678e-18
AT4G25630	0.502	0.000104121	0.699166	0.0463597
AT4G25780	0.610338	0.000134762	0.443577	1.47365e-08
AT4G25810	2.9957	2.48434e-29	1.7276	6.59626e-09
AT4G25830	2.3967	5.28119e-33	1.31284	0.000234019
AT4G25960	1.60941	0.00115835	1.59666	0.00110478
AT4G26010	1.59373	0.000229829	1.65636	2.38992e-05
AT4G26200	0.408674	1.81397e-06	0.846787	0.369429
AT4G26260	36.7349	4.3828e-162	0.804312	0.103708
AT4G26288	2.12182	0.000202986	1.41857	0.0649969
AT4G26320	45.6385	4.53998e-101	1.92102	0.0304285
AT4G26600	1.58499	5.62172e-05	0.988635	0.978628
AT4G26690	2.35698	1.19126e-30	1.32915	0.000114489
AT4G26700	1.62441	1.5069e-12	1.16441	0.0305647
AT4G26780	0.535543	6.95422e-07	1.07665	0.511312
AT4G26890	4.00118	5.90312e-25	1.1008	0.436188
AT4G26930	20.0909	0.000447678	1.11864	1
AT4G27070	0.630484	0.00117145	0.737488	0.0221222
AT4G27100	2.26391	1.39372e-16	0.797116	0.0408797
AT4G27260	0.470624	2.56766e-31	0.538531	2.65046e-20
AT4G27280	2.69485	0.00735399	2.0358	0.0453537
AT4G27350	2.24952	2.87793e-21	1.43295	2.92238e-05
AT4G27410	0.622375	1.23838e-09	0.639972	1.20791e-09
AT4G27430	1.80202	2.76374e-17	1.12489	0.099202
AT4G27460	2.31338	7.8997e-12	2.25499	6.77397e-11
AT4G27520	0.563865	3.8888e-08	1.19785	0.0966903
AT4G27590	3.89467	0.000217898	1.15454	1
AT4G27595	1.73194	0.000125758	1.24111	0.270678
AT4G27657	0.539127	0.000216326	1.73231	0.000166589
AT4G27670	0.101357	0.00029846	180.004	1.31777e-124
AT4G27720	1.75708	4.1728e-15	1.22424	0.0033558
AT4G27840	1.56131	0.00503441	0.817801	0.318187
AT4G28030	1.53293	1.15582e-08	0.974478	0.703237
AT4G28040	1.54701	3.08105e-11	0.656351	6.18363e-10
AT4G28050	1.94982	3.42543e-15	1.11707	0.242634
AT4G28085	1.72433	0.00136988	1.0741	0.6522
AT4G28100	1.63709	4.00216e-06	1.05244	0.712568
AT4G28140	24.7471	5.84818e-34	22.0305	1.23935e-37
AT4G28270	1.87958	6.06658e-23	1.33074	5.83473e-06
AT4G28280	3.23959	7.01679e-06	1.83799	0.00670215
AT4G28290	3.13991	6.48116e-37	1.36585	0.000467402
AT4G28300	1.56592	6.65371e-13	1.27441	0.000108273
AT4G28310	2.59427	0.000315955	1.3257	0.36648
AT4G28390	0.538697	5.12434e-09	0.865566	0.174321
AT4G28450	0.666142	5.40878e-05	0.999365	1
AT4G28490	0.658125	0.00106888	0.659644	0.00206208
AT4G28706	0.640494	0.000726691	0.922179	0.578759
AT4G28790	1.60519	0.00407549	0.634897	0.00740431
AT4G28900	2.11151	1.58701e-10	0.970509	0.887895
AT4G29110	0.272906	1.42177e-12	0.821806	0.378723
AT4G29310	4.22129	7.50277e-54	2.48274	1.76999e-20
AT4G30020	0.644773	2.21953e-06	0.946321	0.591249
AT4G30060	1.68455	2.68026e-05	1.12736	0.316693
AT4G30130	0.622801	0.00791532	0.895186	0.553374
AT4G30150	0.618028	1.57332e-06	1.06221	0.547531
AT4G30180	2.13049	0.00109301	5.82862	0.160423
AT4G30270	0.438948	7.34479e-42	0.716134	3.64027e-08
AT4G30280	3.73729	2.25499e-11	1.40484	0.0640087
AT4G30290	3.853	9.52692e-70	2.02128	1.12274e-15
AT4G30380	0.199354	0.0014995	5.23677	0.000149283
AT4G30400	2.347	1.41954e-16	1.12546	0.305587
AT4G30410	2.64256	6.56595e-23	0.97257	0.801491
AT4G30420	0.405819	9.46505e-10	0.362279	1.88433e-08
AT4G30440	1.74996	2.99685e-11	1.60495	3.35542e-08
AT4G30450	0.51799	5.20964e-11	0.642646	0.000103906
AT4G30470	1.71262	4.90605e-06	1.69554	6.22254e-06
AT4G30500	1.5617	6.76843e-05	0.781409	0.0392161
AT4G30850	2.82278	3.47714e-28	1.32222	0.00333377
AT4G30940	1.64437	0.0051609	1.22704	0.347538
AT4G30980	0.657923	0.00535837	1.0127	0.930787
AT4G30996	1.66303	3.55494e-11	1.24597	0.00344079
AT4G31000	1.97117	1.43427e-21	1.46535	5.83777e-08
AT4G31140	1.84208	1.17083e-07	1.0465	0.71166
AT4G31370	0.269817	6.25846e-07	0.713508	0.184722
AT4G31380	0.530034	2.23765e-19	0.719448	2.59008e-06
AT4G31590	1.76187	9.49578e-16	0.815245	0.00660209
AT4G31610	0.581018	0.00111813	0.75446	0.146961
AT4G31750	1.60117	1.82058e-08	1.24529	0.00995469
AT4G31800	2.45216	0.00564597	2.46979	0.00437512
AT4G31890	0.660822	0.00860163	0.882725	0.496313
AT4G32140	1.67506	1.79581e-10	1.08182	0.324258
AT4G32280	0.413541	3.64756e-12	0.546489	0.0145493
AT4G32290	0.586508	0.000906843	0.638926	0.00607629
AT4G32350	3.37372	9.47632e-42	1.08285	0.398556
AT4G32500	4.26952	1.76177e-05	1.24168	1
AT4G32690	0.606374	0.000426161	1.5003	0.00222522
AT4G32710	1.66527	5.41165e-05	0.799298	0.101081
AT4G32890	1.69409	2.69974e-05	1.62066	0.00138512
AT4G32980	0.600869	0.00155026	0.486677	5.66118e-05
AT4G33070	0.190588	1.42763e-11	5.8387	9.30062e-14
AT4G33220	2.09467	6.87835e-13	1.2643	0.0178273
AT4G33467	6.33024	2.11553e-17	2.53518	9.04093e-06
AT4G33540	0.584866	7.12775e-12	0.654462	6.58339e-08
AT4G33550	0.336342	3.63311e-05	0.339764	0.0100071
AT4G33560	0.29451	4.72023e-05	3.4625	9.01123e-06
AT4G33640	1.532	1.57968e-08	0.927716	0.345877
AT4G33660	2.26072	6.35549e-07	0.992947	0.987322
AT4G33666	6.89416	7.52617e-47	1.57664	0.00327101
AT4G33730	2.39002	0.00701614	0.628099	0.121008
AT4G33800	0.202261	0.000557665	0.227189	0.00616572
AT4G33920	1.72759	7.37063e-14	1.41217	1.57399e-06
AT4G33930	8.48586	0.00943444	3.93191	0.00500836
AT4G33980	1.73151	7.82327e-09	1.40778	0.000174347
AT4G34050	0.633825	1.97492e-11	0.643048	1.25856e-10
AT4G34138	2.19354	9.7653e-32	1.7365	3.00323e-16
AT4G34200	0.442058	2.54032e-32	0.518402	1.92851e-21
AT4G34250	0.609138	6.77187e-13	0.697611	1.31675e-07
AT4G34260	1.6426	9.47975e-10	1.10102	0.263595
AT4G34580	1.53149	0.00982936	1.23138	0.206797
AT4G34610	0.156339	3.81557e-24	0.225792	5.81405e-17
AT4G34710	0.52602	0.000102989	0.590778	0.00219016
AT4G34750	2.72625	1.95476e-09	0.786219	0.292534
AT4G34760	8.47635	1.56374e-42	1.01818	1
AT4G34790	3.17826	0.000182767	4.42327	0.00117799
AT4G34800	2.72543	0.00140361	4.47465	6.3032e-05
AT4G34810	7.57249	2.19222e-21	2.13217	0.000116188
AT4G34870	0.524662	2.36505e-24	0.969353	0.578476
AT4G34881	1.59272	0.000191966	1.90724	3.84501e-06
AT4G35060	0.433979	3.3434e-06	0.495501	0.0152708
AT4G35070	2.32471	1.13273e-14	1.07749	0.59337
AT4G35090	1.51831	6.1287e-12	1.12698	0.0503161
AT4G35100	2.81161	2.0229e-64	1.33526	1.59169e-06
AT4G35110	1.88551	2.23921e-07	1.0304	0.752221
AT4G35200	0.0765369	4.69227e-12	0.35648	0.0330749
AT4G35210	0.138942	0.000828075	1.21306	0.963544
AT4G35220	0.655172	4.84575e-07	0.804752	0.00937763
AT4G35270	0.59444	0.00136474	0.822406	0.240204
AT4G35300	0.638249	1.75656e-07	0.851993	0.0751051
AT4G35320	7.64416	3.3612e-88	1.16258	0.207739
AT4G35470	2.29948	2.39825e-34	0.980881	0.803625
AT4G35560	3.49106	1.40183e-51	1.7889	4.29159e-11
AT4G35630	0.635316	3.05211e-10	0.624345	1.18826e-10
AT4G35810	0.307632	0.000859506	0.913958	0.92772
AT4G35985	2.40983	8.22373e-08	1.80469	0.000323182
AT4G36105	42.2843	2.42093e-07	3.46363	0.544628
AT4G36110	15.3761	6.21608e-17	4.03603	2.31942e-05
AT4G36120	1.83259	7.9409e-07	1.40828	0.00700994
AT4G36360	0.560183	3.30651e-07	0.591944	6.62587e-06
AT4G36380	0.376233	9.12323e-42	0.373675	3.37501e-42
AT4G36570	0.331266	1.18426e-08	0.692828	0.139849
AT4G36648	0.612026	4.37908e-15	1.03992	0.516626
AT4G36710	0.599397	0.000112801	0.953476	0.766076
AT4G36780	0.144536	4.11579e-87	0.184414	1.25709e-68
[truncated: 666 more rows]
