# Supplementary material for: Cell elongation is regulated through a central circuit of interacting transcription factors in the Arabidopsis hypocotyl
Source: eLife. 2014 May 27;3:e03031. doi: 10.7554/eLife.03031 (PMC4075450; doi:10.7554/eLife.03031)
Supplement: Figure 3—source data 2. — Seedlings of wild type and iaa3 were grown on 2 µM propiconazole medium for 5 days in the dark and treated with 100 nM brassinolide for 4 hr. The IAA3-regulated genes were defined by 1.5-fold difference between iaa3 and wild type with p<0.01. DOI: http://dx.doi.org/10.7554/eLife.03031.013 [file elife03031s004.xlsx]

## Sheet: Sheet1
Figure 3-source data 2. Genes whose expression levels are affected in the iaa3 mutant. Seedlings of wild type and iaa3 were grown on 2 µM propiconazole medium for 5 days in the dark and treated with 100 nM brassinolide for 4 hr. The IAA3-regulated genes were defined by 1.5-fold difference between iaa3 and wild type with p-value< 0.01.
Gene	Fold change (iaa3 / wild type)	p-value
AT5G18050	0	6.71583e-99
AT3G03850	0	3.87067e-70
AT1G29440	0	5.76577e-70
AT5G18020	0	4.29732e-68
AT3G28857	0	1.58567e-57
AT1G52830	0	3.60971e-48
AT3G60650	0	1.40894e-37
AT2G21200	0	4.31425e-26
AT4G10160	0	9.28624e-15
AT2G01770	0	1.41088e-14
AT1G70260	0	5.29829e-10
AT4G11020	0	1.9199e-09
AT5G36900	0	1.07534e-08
AT3G60647	0	1.20717e-07
AT3G29060	0	1.9736e-07
AT2G34655	0	3.57572e-07
AT1G29420	0	6.1533e-06
AT1G09350	0	1.09752e-05
AT1G65330	0	1.74433e-05
AT1G62450	0	2.85679e-05
AT5G24105	0	4.74557e-05
AT4G22460	0	7.58613e-05
AT1G61270	0	0.00039635
AT5G28335	0	0.000409776
AT4G08093	0	0.000456254
AT5G45180	0	0.000739377
AT3G28917	0	0.000886156
AT3G62990	0	0.000945703
AT1G68800	0	0.00149813
AT5G53610	0	0.00204465
AT4G01975	0	0.00223576
AT1G07340	0	0.00287648
AT1G09600	0	0.0029763
AT2G35990	0	0.00448588
AT2G17600	0	0.00491366
AT1G48470	0	0.00647039
AT4G38860	0.00137792	3.15646e-72
AT5G18010	0.00193086	1.32295e-124
AT3G03830	0.00200848	1.26626e-60
AT3G03840	0.00238631	8.59273e-52
AT1G29460	0.00266475	8.75594e-55
AT1G29490	0.00273771	1.73081e-45
AT5G18030	0.00300429	1.6957e-116
AT1G29450	0.00350942	3.2935e-74
AT4G25250	0.00411713	4.83184e-08
AT5G37950	0.00427923	8.50582e-31
AT5G18080	0.00457279	3.16287e-52
AT1G29430	0.00466671	1.18839e-49
AT4G38850	0.00535526	4.41938e-48
AT3G54830	0.00538348	1.13391e-72
AT3G03820	0.00553797	6.93477e-48
AT1G75900	0.00709087	2.15824e-23
AT2G18010	0.00758757	3.49621e-48
AT5G65800	0.00877574	2.76445e-57
AT4G34760	0.00884535	6.78755e-98
AT1G04660	0.011005	3.1749e-13
AT5G18060	0.0111133	2.80148e-66
AT4G25420	0.0111263	1.25311e-23
AT1G29500	0.0117861	1.0463e-74
AT4G16515	0.0129785	4.29121e-277
AT5G53250	0.013473	0
AT1G78490	0.0143153	1.92094e-11
AT3G42800	0.0148289	1.59213e-31
AT4G13790	0.015437	3.88507e-24
AT3G48940	0.0158002	5.08913e-15
AT5G35525	0.0159342	2.3962e-104
AT3G55940	0.0172717	1.05452e-47
AT5G45950	0.017649	4.65506e-72
AT5G39860	0.0197811	1.06347e-12
AT2G33790	0.0201348	0.00105222
AT2G40610	0.0205711	3.53074e-28
AT3G57510	0.0215085	7.19739e-07
AT1G29510	0.022219	2.48319e-53
AT5G24580	0.0233317	4.67482e-199
AT1G70985	0.0240675	3.7279e-12
AT5G01330	0.0240958	6.46758e-44
AT2G43050	0.0257366	1.17546e-106
AT4G11320	0.0259721	7.18962e-110
AT2G21210	0.0260357	1.29833e-70
AT5G37300	0.0265861	7.51055e-05
AT4G10150	0.0266524	1.34937e-09
AT5G45670	0.0275752	6.03941e-217
AT4G21745	0.0285187	2.76404e-26
AT2G01200	0.0293179	2.16278e-53
AT4G26930	0.0293555	0.000420368
AT2G20750	0.0302315	1.62641e-17
AT5G47450	0.0311355	3.24674e-82
AT4G30180	0.031336	1.13467e-20
AT2G26220	0.0321907	1.25262e-06
AT1G53163	0.0326298	1.53338e-07
AT3G15540	0.0334438	3.56202e-184
AT5G11540	0.0340218	6.62903e-19
AT3G53980	0.0341505	3.15091e-45
AT5G23750	0.0344749	5.98225e-95
AT3G50890	0.0345753	8.00668e-53
AT3G54450	0.0347452	0.00327604
AT3G17010	0.0349019	0.000127393
AT1G78970	0.0349806	9.33833e-70
AT2G11810	0.0352235	4.13983e-10
AT1G74420	0.0363625	1.77587e-16
AT3G06145	0.0370727	2.05507e-10
AT3G53010	0.0372553	3.65973e-18
AT1G72230	0.0376983	2.692e-54
AT4G27590	0.0378889	6.30837e-10
AT4G26320	0.0397157	2.17406e-80
AT3G27250	0.0399141	0.000102594
AT3G28899	0.0402176	0.000123938
AT1G15580	0.0413723	0.00340384
AT2G21880	0.0416728	4.56176e-47
AT1G26945	0.0420898	7.58698e-125
AT5G13170	0.0426236	0.00108591
AT5G66590	0.0430802	2.50401e-33
AT3G06868	0.0439619	4.8412e-16
AT4G36105	0.0439727	5.73648e-06
AT5G10430	0.0454701	0
AT2G44230	0.0455059	1.5245e-51
AT3G18880	0.0459762	0.000281915
AT5G33395	0.0465312	7.72538e-61
AT4G01985	0.0465359	0.00421733
AT4G31830	0.0465537	0.00331642
AT1G30080	0.0466052	5.32637e-13
AT4G12510	0.0480573	1.11996e-05
AT1G76240	0.0482448	2.67804e-48
AT1G32510	0.0485689	6.95952e-05
AT3G50120	0.0498132	2.18975e-12
AT4G09890	0.0508712	7.9723e-220
AT4G38840	0.0516548	1.45204e-39
AT2G22810	0.0521303	6.11202e-08
AT4G02650	0.0532188	0.00337957
AT1G68825	0.0542798	3.78664e-08
AT5G53190	0.054721	6.4222e-08
AT4G32500	0.0564311	9.84572e-11
AT5G33390	0.0568869	1.80234e-19
AT2G27930	0.0584447	3.22484e-31
AT5G45095	0.0587537	7.57948e-05
AT2G30370	0.0599783	9.52874e-18
AT4G19380	0.0609451	1.10981e-11
AT2G31085	0.0616532	8.66758e-06
AT1G11120	0.061964	1.00417e-58
AT1G78230	0.0625198	5.67756e-93
AT3G01260	0.0631307	0.000246315
AT1G73290	0.0636066	1.02277e-06
AT3G21460	0.0646256	1.08151e-17
AT5G46940	0.0651713	1.27094e-06
AT2G19780	0.0660599	4.42146e-19
AT5G59010	0.0662416	1.37903e-168
AT3G24715	0.0669571	6.02481e-43
AT3G59370	0.0671633	6.03199e-34
AT5G52900	0.0681244	5.08235e-54
AT1G52750	0.0691404	5.30199e-56
AT3G51410	0.071568	5.02217e-24
AT1G80280	0.0725253	1.17838e-45
AT4G17340	0.0727447	5.58192e-107
AT2G22460	0.0728239	0.00150039
AT1G72620	0.0729052	0.00210916
AT5G46900	0.0737462	8.76236e-13
AT3G16370	0.0744202	1.70251e-87
AT3G54770	0.0765036	2.715e-61
AT5G20710	0.0771247	1.17831e-15
AT1G62620	0.07852	0.000111796
AT5G26330	0.0801583	6.63606e-08
AT4G13210	0.080189	0.000240972
AT5G66580	0.0804933	3.25732e-21
AT3G42658	0.0836303	1.0763e-16
AT4G34650	0.0842992	2.23391e-12
AT1G06120	0.0857485	5.58021e-05
AT1G06225	0.0858076	0.00436499
AT5G48890	0.0859276	0.000883199
AT5G15360	0.0860341	0.0018496
AT3G61680	0.0869802	3.53579e-51
AT3G07010	0.0873698	5.8619e-80
AT2G17300	0.0875016	3.34381e-12
AT3G01345	0.0879705	9.47338e-05
AT5G40730	0.0885602	4.2505e-172
AT4G35160	0.0886612	5.86576e-06
AT5G41900	0.0889602	1.35766e-62
AT5G03170	0.0907963	5.28805e-29
AT1G79760	0.0908479	3.45706e-05
AT1G08500	0.0916891	1.09886e-89
AT1G53690	0.0917104	4.76539e-22
AT3G54730	0.0922325	8.45821e-06
AT5G61570	0.0922914	9.28466e-41
AT2G27240	0.0925139	1.06554e-10
AT4G23560	0.0926214	2.70006e-112
AT4G00910	0.0939789	1.17914e-13
AT1G65875	0.0941854	1.62481e-06
AT5G46890	0.0946841	1.13052e-10
AT5G39100	0.096044	0.00417124
AT1G05835	0.096667	4.83147e-53
AT1G04240	0.0976453	8.24364e-165
AT1G62440	0.100055	7.03611e-09
AT4G09875	0.100175	0.00398829
AT1G73220	0.100613	2.17641e-39
AT4G14560	0.101409	1.28414e-56
AT1G01200	0.10163	2.26982e-13
AT5G63820	0.101838	2.66933e-42
AT5G51790	0.102264	4.45805e-15
AT1G75030	0.102569	0.00134999
AT2G14610	0.102993	5.47211e-17
AT3G21670	0.103731	2.03046e-07
AT3G06640	0.104071	9.94675e-12
AT5G62490	0.104829	9.73471e-06
AT2G42800	0.105027	3.7623e-08
AT1G06350	0.105367	6.39568e-33
AT4G03070	0.105424	4.20643e-19
AT2G24800	0.105736	3.36672e-08
AT1G28650	0.107195	0.000419053
AT1G55330	0.107314	1.76592e-201
AT3G25790	0.108063	0.000504956
AT2G37090	0.108067	0.000591819
AT3G02480	0.108122	0.00504814
AT2G40470	0.108537	7.9151e-16
AT3G19430	0.108662	1.02837e-05
AT1G80740	0.10896	0.000134242
AT1G23760	0.109879	3.06352e-41
AT5G38710	0.110211	1.51606e-27
AT4G32280	0.110243	2.82528e-30
AT4G26260	0.110303	6.27015e-86
AT5G38010	0.110619	2.43689e-07
AT2G16270	0.110711	1.10783e-14
AT2G40250	0.110939	3.48617e-09
AT2G21050	0.111478	4.62636e-42
AT1G56430	0.111515	0.000461997
AT3G58120	0.111751	1.29681e-87
AT5G60660	0.111955	2.82106e-50
AT2G44740	0.112265	2.60606e-49
AT1G66940	0.112827	1.13386e-34
AT5G22860	0.114033	1.13666e-64
AT4G10310	0.115019	1.47547e-14
AT2G46300	0.115294	0.00210823
AT4G01140	0.11533	7.33386e-52
AT3G25717	0.115774	1.10207e-114
AT1G75550	0.116577	1.24067e-07
AT3G29370	0.117236	1.0273e-107
AT5G15630	0.117648	1.57603e-12
AT1G07050	0.11851	2.08578e-08
AT5G20410	0.118939	8.55402e-07
AT1G54120	0.119507	1.65595e-10
AT1G48330	0.121389	2.4012e-30
AT3G01440	0.122009	5.88153e-12
AT2G15440	0.122339	7.13962e-15
AT4G17460	0.122814	7.67127e-78
AT3G63050	0.123013	0.00222903
AT5G15140	0.123051	5.28759e-05
AT1G23340	0.123515	6.54224e-09
AT2G27402	0.124108	0.000119155
AT2G19660	0.124427	3.02967e-32
AT5G44065	0.125396	0.00262207
AT3G49220	0.125779	7.75144e-36
AT1G69570	0.126191	1.13999e-19
AT1G04250	0.127679	2.15275e-155
AT4G23870	0.127848	3.0978e-133
AT5G60650	0.128831	0.00135679
AT2G21140	0.128945	2.3494e-17
AT4G22235	0.129579	7.76579e-06
AT3G20460	0.130959	0.00172504
AT4G11780	0.131149	0.000155121
AT5G42600	0.132013	0.00391752
AT4G23020	0.132529	0.000727127
AT3G63430	0.132665	3.26109e-09
AT4G38400	0.132906	1.42298e-134
AT1G02205	0.133328	1.69304e-13
AT1G63950	0.134447	0.000819836
AT3G03240	0.135992	2.77327e-07
AT4G11210	0.136122	0.000136015
AT2G14160	0.13719	9.01395e-15
AT4G14380	0.137505	3.75154e-23
AT3G58850	0.137859	1.34463e-62
AT5G48460	0.13835	1.26117e-44
AT1G78520	0.139029	7.12394e-05
AT3G22820	0.140764	0.000206108
AT5G51780	0.140811	1.62125e-79
AT3G60390	0.141209	1.53147e-55
AT3G63470	0.141313	2.08604e-35
AT3G26815	0.142234	0.00023927
AT5G23400	0.142396	5.56146e-13
AT1G03170	0.143166	5.28405e-06
AT5G48740	0.143638	0.00267174
AT3G60700	0.143836	0.00266636
AT2G17680	0.144534	0.0036672
AT3G28070	0.144544	0.00186287
AT4G17280	0.144648	3.39773e-39
AT4G01190	0.144727	0.00618683
AT1G70990	0.14551	1.72738e-44
AT4G35320	0.145649	1.09268e-76
AT1G06340	0.14571	0.000155397
AT1G63300	0.146244	5.50781e-27
AT5G56540	0.146655	1.64885e-35
AT5G61660	0.148118	7.72783e-25
AT4G18780	0.148857	4.5402e-18
AT1G74670	0.149496	1.39859e-86
AT3G51930	0.150063	6.77483e-11
AT5G51890	0.150308	4.69756e-16
AT1G30690	0.150653	3.69959e-29
AT1G61170	0.150827	5.55155e-27
AT4G36110	0.151174	9.81829e-10
AT4G24700	0.151596	1.16552e-05
AT4G21490	0.151712	1.43584e-15
AT2G45470	0.15212	7.09373e-50
AT5G18000	0.152604	0.000175968
AT1G05420	0.15345	1.67693e-09
AT5G59930	0.153539	1.80297e-35
AT2G37240	0.154573	2.43298e-05
AT1G64390	0.154868	5.33069e-38
AT3G23870	0.155057	7.5283e-20
AT4G24180	0.155411	1.56983e-30
AT1G75780	0.155437	3.88683e-56
AT3G57920	0.156007	6.31155e-06
AT1G02800	0.158239	5.78945e-09
AT5G44670	0.158509	1.79311e-47
AT4G00050	0.158732	7.2561e-10
AT5G55250	0.159914	2.51614e-06
AT5G01360	0.159963	0.00145286
AT3G17580	0.160259	1.78436e-24
AT1G12080	0.160713	2.83316e-178
AT4G24780	0.161831	1.07281e-28
AT3G13980	0.162538	1.53995e-26
AT1G53080	0.162781	3.17368e-05
AT1G18100	0.163423	0.000637183
AT1G11080	0.163775	0.000127643
AT3G11640	0.164185	0.00164176
AT1G62610	0.164196	1.23772e-68
AT4G02130	0.164197	7.02518e-94
AT2G41480	0.164277	0.000906984
AT5G38060	0.166041	0.00630679
AT1G72140	0.166235	0.000441063
AT1G27380	0.167812	0.00673616
AT1G12090	0.167872	1.37718e-57
AT3G23635	0.168604	9.51811e-05
AT1G26780	0.169429	2.93734e-08
AT5G48900	0.169453	4.7479e-38
AT5G57050	0.170413	7.84493e-38
AT2G47500	0.17103	1.27376e-55
AT4G37220	0.171366	9.85674e-39
AT4G20362	0.171865	2.85174e-46
AT1G75700	0.173451	0.000208889
AT3G12870	0.173958	0.00150373
AT2G17770	0.173972	0.0021547
AT3G49820	0.174095	0.00447968
AT1G62262	0.174324	0.00393617
AT2G20080	0.174418	2.29172e-08
AT1G74500	0.174507	0.000471814
AT5G16590	0.175028	2.45906e-67
AT4G18970	0.175122	4.46955e-92
AT1G26890	0.175399	4.92572e-06
AT5G23360	0.17594	6.46534e-28
AT2G28870	0.176079	0.000123989
AT3G16700	0.176652	6.76423e-35
AT4G36600	0.177359	0.00294049
AT1G53700	0.177469	1.42663e-06
AT3G20210	0.177815	9.64598e-21
AT2G46570	0.177997	0.00690278
AT4G08300	0.178062	4.6785e-30
AT2G42840	0.178329	1.48958e-56
AT1G25425	0.178729	2.02673e-08
AT3G12610	0.179207	1.54696e-134
AT2G38600	0.179334	0.00768755
AT4G01575	0.179707	5.70266e-08
AT2G39040	0.179888	0.00312155
AT5G47370	0.180257	7.06481e-36
AT1G33813	0.180356	1.55084e-05
AT1G05100	0.180849	8.89336e-06
AT1G45020	0.181153	0.000561759
AT2G40475	0.181323	2.97917e-22
AT3G53040	0.181445	0.000433429
AT3G05890	0.18187	5.18643e-101
AT5G06930	0.181987	2.60867e-97
AT2G29620	0.182225	5.32088e-10
AT1G11740	0.182234	3.93272e-55
AT1G14390	0.182305	5.68324e-20
AT5G63140	0.182466	1.29957e-37
AT3G62040	0.183017	1.82375e-50
AT2G04570	0.183097	4.67428e-28
AT3G15670	0.183553	0.00589889
AT2G40955	0.184559	0.00694659
AT2G46760	0.18459	0.00296714
AT3G14370	0.184682	1.97124e-12
AT5G63450	0.184737	8.2892e-47
AT1G35255	0.184744	0.00705586
AT3G16920	0.184946	1.44056e-13
AT1G52240	0.185046	1.15608e-72
AT3G10080	0.185322	2.74633e-22
AT4G08685	0.185628	3.39992e-66
AT1G32450	0.185919	2.14365e-30
AT3G15370	0.18608	5.15988e-05
AT2G22200	0.186372	3.68564e-17
AT4G37770	0.186409	8.70645e-27
AT3G23050	0.187186	7.50115e-135
AT1G12070	0.18784	1.34402e-24
AT2G38500	0.188054	7.7373e-22
AT4G34750	0.188342	1.16831e-18
AT4G12730	0.188674	8.08348e-135
AT1G29660	0.189435	9.19187e-30
AT5G26730	0.189625	1.04276e-13
AT1G64640	0.190088	4.8092e-76
AT5G03760	0.190404	2.02228e-41
AT1G62430	0.190893	7.34011e-27
AT4G37925	0.191178	1.82961e-11
AT2G35300	0.191688	0.00207527
AT1G79620	0.192737	1.39882e-21
AT1G70890	0.192745	3.88782e-35
AT1G01900	0.193001	3.38053e-12
AT4G39770	0.193037	8.78083e-07
AT1G11410	0.193131	2.52375e-19
AT2G14890	0.194149	4.57383e-137
AT3G62570	0.195412	1.97171e-45
AT1G65920	0.195634	1.15081e-42
AT3G55130	0.195811	3.88606e-15
AT2G26695	0.196109	4.8516e-22
AT1G09812	0.19642	6.5497e-05
AT4G00430	0.196499	4.06366e-56
AT4G35060	0.196896	1.22188e-10
AT3G62070	0.197277	2.18089e-16
AT2G14960	0.197359	0.00367299
AT5G15150	0.197711	2.22967e-62
AT4G30460	0.197766	7.35974e-34
AT3G02830	0.198364	1.29222e-25
AT1G75490	0.200292	3.11162e-42
AT5G14610	0.200574	4.30524e-44
AT5G41400	0.200822	1.77964e-25
AT2G23170	0.201076	2.02087e-10
AT4G30290	0.201235	1.0639e-88
AT3G16380	0.201476	0.00040979
AT4G34770	0.201695	1.25955e-14
AT4G29030	0.201782	0.000659479
AT3G26445	0.201899	1.468e-07
AT1G20190	0.202349	3.6109e-86
AT4G21970	0.202623	3.56197e-10
AT1G70210	0.202663	1.14513e-49
AT3G56100	0.203385	6.5316e-07
AT1G20070	0.203838	1.15932e-34
AT5G02190	0.203849	6.09105e-16
AT1G29465	0.204145	7.40524e-23
AT1G01620	0.205119	1.22843e-84
AT5G57260	0.20571	8.21492e-12
AT4G39800	0.205884	1.00422e-07
AT1G65310	0.206043	1.43956e-89
AT5G55960	0.206225	4.99218e-54
AT5G44417	0.206812	6.78973e-36
AT4G22545	0.207013	0.0092131
AT5G05330	0.207233	0.0086221
AT5G43490	0.2074	3.86006e-05
AT4G31330	0.207419	2.78149e-15
AT3G07000	0.207514	1.28543e-24
AT4G25260	0.208134	1.46407e-104
AT3G53200	0.208284	1.82476e-33
AT5G23350	0.209289	1.4572e-43
AT1G56660	0.209462	3.49978e-114
AT5G04000	0.210031	0.00988117
AT2G38390	0.210592	2.51898e-06
AT4G35350	0.211001	4.71949e-12
AT5G39240	0.211027	1.70405e-11
AT5G47330	0.211165	3.45581e-15
AT1G60090	0.211413	0.00171914
AT3G14440	0.211588	1.29145e-08
AT1G47630	0.211887	0.000817714
AT1G61160	0.21281	2.3903e-05
AT5G46960	0.212991	3.41811e-08
AT2G33205	0.213618	0.000133728
AT4G40010	0.215665	7.54293e-11
AT2G41820	0.215848	2.42231e-59
AT3G24640	0.216014	0.0045873
AT2G37640	0.216388	1.71204e-85
AT5G49320	0.216555	0.000875378
AT3G62100	0.216981	0.000112056
AT1G67750	0.217233	1.46538e-33
AT4G26580	0.217741	7.13749e-05
AT1G52000	0.218667	0.00086957
AT3G18200	0.21887	1.52601e-11
AT5G37500	0.218951	1.32695e-22
AT1G32080	0.219229	3.13479e-14
AT1G22990	0.220752	2.33804e-11
AT4G39795	0.221217	3.54637e-06
AT1G48480	0.221412	7.2877e-20
AT2G37460	0.222805	8.93611e-13
AT1G74055	0.222972	1.04743e-08
AT3G26310	0.223745	4.20927e-11
AT3G45430	0.22423	0.000376907
AT5G19600	0.224681	0.00955451
AT1G32560	0.224836	4.62825e-17
AT5G57670	0.224948	1.47819e-26
AT3G23090	0.225258	1.0495e-44
AT3G50220	0.225264	0.00731534
AT4G23400	0.225273	1.13015e-32
AT5G53710	0.225564	3.51713e-06
AT4G36230	0.22617	0.00383322
AT5G65890	0.226348	1.35776e-05
AT4G00400	0.226963	2.48061e-59
AT1G78995	0.227679	6.42334e-05
AT5G22870	0.227705	0.00264272
AT5G43990	0.227762	5.48384e-06
AT2G26760	0.229555	0.000893871
AT1G02650	0.230542	1.19048e-14
AT3G16240	0.231122	8.31132e-122
AT3G25905	0.231131	0.000926471
AT1G44110	0.232491	0.00661479
AT4G17220	0.232774	8.95411e-18
AT3G29030	0.233179	1.84076e-16
AT5G57070	0.233573	2.26206e-24
AT5G19810	0.233643	0.00392125
AT1G08090	0.233795	1.16362e-06
AT5G03260	0.233841	8.05043e-05
AT1G60030	0.234383	3.45103e-14
AT1G78260	0.236328	4.74476e-39
AT2G31940	0.237171	0.000301802
AT2G20724	0.237197	1.45609e-34
AT5G35935	0.23761	2.25353e-32
AT1G07610	0.23797	2.27025e-25
AT2G38080	0.238271	1.44286e-09
AT3G01500	0.238356	0.000502126
AT1G26790	0.238579	0.00668624
AT2G46950	0.239471	8.34662e-25
AT2G06850	0.23962	9.62802e-55
AT5G58750	0.239679	1.55851e-39
AT1G06360	0.239847	1.92e-26
AT3G05727	0.239849	1.09534e-33
AT5G14690	0.239937	9.90478e-12
AT4G32460	0.240124	7.05039e-90
AT4G33550	0.240331	0.000263309
AT2G25130	0.240703	0.000826631
AT1G61450	0.241152	0.0081875
AT1G75620	0.241822	4.59867e-05
AT1G18990	0.241872	0.00786591
AT3G44540	0.243997	0.00307253
AT1G55010	0.245543	0.000222237
AT5G52300	0.245605	4.25349e-13
AT2G10940	0.24619	4.16427e-30
AT1G20850	0.246266	3.89162e-29
AT5G43030	0.246272	5.67516e-10
AT4G14330	0.246681	0.000367589
AT4G22513	0.246763	3.92447e-06
AT1G33817	0.246904	7.94982e-05
AT5G64110	0.246954	6.40927e-39
AT1G22330	0.247195	1.23246e-29
AT4G10560	0.247524	4.56219e-07
AT4G30410	0.247563	1.07198e-39
AT5G64850	0.248078	2.58701e-15
AT1G13670	0.248618	3.21701e-39
AT2G27740	0.250119	7.03032e-07
AT4G33666	0.250486	4.36476e-27
AT5G07110	0.250683	3.49901e-44
AT5G47240	0.25082	4.49172e-44
AT1G12845	0.250879	7.89573e-06
AT5G14070	0.251032	3.34982e-15
AT2G28305	0.25166	6.90358e-27
AT2G38480	0.251671	5.95542e-19
AT2G39855	0.251771	7.98483e-21
AT1G02335	0.253055	6.04731e-12
AT4G10020	0.253358	1.33934e-17
AT3G18850	0.253567	1.17122e-19
AT1G03870	0.253814	4.31545e-99
AT2G30930	0.25552	2.87252e-95
AT1G70900	0.255614	6.52697e-19
AT5G27000	0.256132	1.06101e-37
AT4G21740	0.256608	2.13134e-21
AT2G16280	0.25746	7.98019e-69
AT5G12270	0.257774	2.83217e-12
AT3G55990	0.25785	4.15101e-11
AT3G54400	0.258234	2.23464e-75
AT1G14120	0.258458	1.9635e-09
AT4G22230	0.258488	3.70204e-05
AT3G51290	0.258554	9.53708e-06
AT5G67390	0.258628	1.21057e-34
AT1G02350	0.259272	0.000991933
AT3G24450	0.25999	1.1849e-33
AT2G36590	0.260124	2.03349e-05
AT5G22940	0.260631	3.56609e-60
AT1G11600	0.260791	9.05168e-08
AT5G46950	0.261028	9.4289e-06
AT1G22490	0.261112	0.00188736
AT4G12520	0.261152	1.59735e-07
AT2G01520	0.262046	0.00361016
AT3G44220	0.262757	0.00353981
AT1G48240	0.26286	2.14092e-52
AT5G06760	0.26289	6.20394e-07
AT5G56320	0.262996	1.02486e-16
AT1G11545	0.263088	2.90546e-70
AT1G48580	0.263151	0.00350745
AT4G22620	0.263336	0.000122303
AT5G39865	0.26346	8.6056e-15
AT2G05632	0.264286	3.54346e-10
AT3G06770	0.264603	3.01956e-45
AT2G12462	0.26495	1.2384e-19
AT3G10310	0.265044	4.47257e-06
AT1G79520	0.266332	1.5321e-11
AT4G16162	0.266411	1.0246e-05
AT1G08160	0.266539	5.22434e-16
AT4G36880	0.266739	2.17381e-09
AT2G14060	0.266917	0.000215849
AT3G02850	0.267001	1.24731e-08
AT2G01590	0.267236	2.89167e-08
AT1G66350	0.267573	7.79086e-22
AT2G45050	0.267624	1.58769e-44
AT3G49330	0.267648	0.000624534
AT3G17050	0.267675	1.26465e-10
AT2G04090	0.268094	0.00206502
AT3G20450	0.268124	0.00011616
AT3G45160	0.268336	2.23331e-08
AT1G26960	0.268656	9.62995e-24
AT2G16580	0.269014	0.000965227
AT1G22630	0.269073	8.70709e-19
AT2G21220	0.269119	1.43578e-05
AT3G17640	0.269764	5.43907e-05
AT1G53830	0.270445	7.47888e-33
AT2G34315	0.271114	4.58276e-05
AT5G15265	0.271469	7.01591e-17
AT5G03620	0.272518	2.02809e-10
AT4G30140	0.272587	4.23567e-36
AT2G28315	0.272687	1.10132e-05
AT1G31750	0.272711	5.34393e-06
AT1G21510	0.273781	2.7863e-05
AT3G26932	0.273919	2.76468e-41
AT2G21770	0.274428	0.0037694
AT5G04190	0.274659	1.13063e-34
AT1G03630	0.274774	5.43019e-06
AT3G05936	0.274807	0.0047213
AT3G28750	0.275189	0.00806185
AT5G14750	0.275391	3.59999e-07
AT3G62020	0.275429	8.71691e-07
AT3G14517	0.275679	0.00021559
AT5G51210	0.275956	1.76179e-16
AT1G56423	0.276206	4.90395e-27
AT1G18870	0.276489	4.71909e-08
AT4G25240	0.276948	0.000135585
AT3G53420	0.276974	2.43923e-95
AT2G22830	0.278148	4.89561e-15
AT1G67860	0.278634	1.48403e-09
AT5G58670	0.278689	5.63434e-05
AT1G23080	0.279405	2.15813e-74
AT5G59940	0.280113	1.12031e-20
AT3G26460	0.280724	0.00324162
AT2G26710	0.280815	4.48781e-44
AT4G20870	0.280974	4.27645e-64
AT1G69690	0.281227	1.23452e-30
AT2G28780	0.281393	8.09189e-07
AT4G28900	0.281579	1.1059e-22
AT3G11090	0.281886	0.000707427
AT5G58465	0.282008	0.000663106
AT3G08885	0.282252	0.000983971
AT2G42380	0.282645	1.36973e-25
AT5G11420	0.282687	4.44188e-35
AT3G49845	0.283185	5.61876e-13
AT5G11990	0.283238	0.000105174
AT2G21370	0.284609	0.0042874
AT5G54240	0.284787	8.51429e-05
AT5G10770	0.284799	4.36112e-16
AT4G25150	0.285314	5.43434e-05
AT5G43020	0.285563	2.10686e-22
AT1G29090	0.286316	8.04909e-53
AT3G50130	0.287228	0.000170409
AT2G33020	0.287962	0.00208124
AT5G10120	0.288019	0.00615085
AT1G63650	0.288225	5.02547e-07
AT2G17500	0.288589	4.19306e-20
AT4G35720	0.28864	8.57039e-72
AT5G07000	0.289338	1.41865e-37
AT5G55780	0.289401	0.00714516
AT4G23990	0.289753	0.0022408
AT5G57080	0.289818	0.000987841
AT1G79110	0.289827	4.70758e-13
AT1G76800	0.290552	0.00612206
AT2G42690	0.291797	1.30531e-05
AT3G05800	0.291836	1.29812e-14
AT4G14640	0.291913	1.94017e-09
AT1G53940	0.291955	2.65021e-06
AT1G18835	0.292041	0.00782346
AT4G04830	0.292689	4.71631e-29
AT3G09240	0.293068	0.00361781
AT1G70850	0.293666	2.81856e-08
AT1G73330	0.293698	4.12246e-05
AT4G32780	0.294468	3.00965e-05
AT1G75280	0.294677	9.21736e-16
AT3G61490	0.294732	6.04189e-20
AT5G17420	0.294881	3.59482e-11
AT5G50240	0.295071	0.000720524
AT4G24275	0.295107	3.69932e-35
AT5G23370	0.295282	0.000125293
AT4G27595	0.296184	1.19703e-14
AT5G01870	0.296574	2.21582e-07
AT5G52990	0.296785	1.82579e-29
AT3G56220	0.29679	0.00680449
AT1G75500	0.297249	2.62128e-51
AT4G25280	0.297465	4.18149e-31
AT4G22900	0.297578	0.00408181
AT2G40460	0.297653	0.000329196
AT1G62480	0.298151	2.08038e-85
AT5G23860	0.29828	2.43366e-66
AT2G46780	0.298304	6.98886e-25
AT5G42500	0.298371	0.000449835
AT2G35950	0.298459	0.00277789
AT4G37890	0.298744	1.9723e-12
AT2G01610	0.299393	0.0037559
AT5G06940	0.299477	2.21579e-05
AT1G64670	0.299855	4.18107e-18
AT3G05950	0.300303	1.00065e-15
AT3G12685	0.300467	1.98271e-06
AT5G46530	0.300628	8.8109e-09
AT1G29195	0.300645	3.84332e-08
AT1G72240	0.301116	2.87457e-07
AT3G50100	0.301158	0.00020647
AT3G15115	0.301201	4.07559e-29
AT1G29920	0.301343	2.96402e-05
AT2G45870	0.30293	0.000559807
AT1G62360	0.303373	8.51158e-25
AT5G17160	0.303742	0.000366441
AT5G55370	0.304091	0.00151844
AT5G61650	0.304149	0.00658196
AT3G53620	0.304212	1.43475e-41
AT1G52910	0.304499	7.40745e-21
AT3G62950	0.304509	2.83963e-15
AT5G01015	0.304663	0.00793264
AT5G01335	0.304698	0.00187644
AT2G37180	0.304724	2.6892e-42
AT1G78720	0.305536	0.00118308
AT3G09730	0.306179	1.05525e-05
AT1G09750	0.306209	1.79243e-17
AT1G75060	0.306381	0.000149214
AT3G62660	0.306648	2.25386e-48
AT5G61200	0.307598	1.14299e-12
AT1G38131	0.307724	0.000135031
AT3G18660	0.307841	2.63894e-05
AT1G60260	0.308068	0.00139626
AT1G64970	0.308258	1.29448e-08
AT3G54920	0.308609	1.186e-49
AT2G48080	0.308668	1.12327e-06
AT2G30010	0.30899	2.76933e-15
AT5G63810	0.309457	1.50945e-33
AT1G67040	0.309496	1.53355e-13
AT5G15830	0.309601	2.96929e-35
AT3G56000	0.309642	1.11495e-24
AT2G25090	0.309724	4.79178e-07
AT2G45480	0.309818	1.36688e-05
AT4G11950	0.309832	0.00399137
AT2G43340	0.30987	4.75216e-43
AT4G09970	0.310035	3.66482e-06
AT5G06470	0.310108	4.3625e-08
AT3G23030	0.310121	2.66877e-71
AT4G38320	0.310187	4.68521e-09
AT5G41460	0.310709	0.000301885
AT3G62160	0.310986	0.000157089
AT3G27690	0.311057	1.68057e-09
AT1G19440	0.311446	3.34608e-28
AT5G22200	0.311583	9.21458e-05
AT4G15630	0.311619	3.65583e-18
AT3G04910	0.311782	5.9166e-66
AT1G05490	0.31185	1.20539e-09
AT2G34070	0.311879	1.63824e-32
AT1G09850	0.311987	9.10023e-06
AT2G05790	0.312371	1.08562e-50
AT1G35260	0.313052	3.03144e-19
AT3G01516	0.313111	1.42832e-05
AT5G15230	0.313416	5.09475e-45
AT5G13870	0.313717	2.4604e-22
AT1G69480	0.313753	9.66506e-05
AT5G55730	0.313858	1.28259e-31
AT4G38690	0.314113	6.86924e-51
AT5G39110	0.314142	0.00543861
AT3G22400	0.314217	4.36686e-09
AT4G01340	0.31451	0.00772882
AT3G25290	0.31578	7.56346e-09
AT1G36940	0.316036	4.57935e-09
AT3G28760	0.316226	2.59312e-06
AT3G50350	0.316235	4.24323e-18
AT3G55420	0.316595	1.06623e-19
AT4G22485	0.317018	2.86711e-16
AT2G28860	0.317587	2.20555e-06
AT4G35070	0.317993	3.15642e-23
AT1G51170	0.318071	1.4074e-13
AT4G29020	0.318311	3.36354e-35
AT2G45960	0.318478	1.70549e-77
AT1G75260	0.318572	0.000739702
AT5G19530	0.318791	2.97005e-49
AT5G02140	0.319648	7.45644e-07
AT1G31040	0.319974	1.53266e-19
AT1G31070	0.320189	4.24843e-34
AT1G68360	0.320256	6.7007e-06
AT3G43720	0.320279	2.12381e-52
AT1G51140	0.320299	5.46888e-11
AT3G11750	0.320596	4.75844e-09
AT4G17480	0.320636	8.45059e-05
AT5G67370	0.320704	0.00771125
AT4G10280	0.320923	0.00949449
AT5G06390	0.321488	1.45402e-49
AT3G25110	0.321769	2.40462e-13
AT4G22505	0.322013	3.56826e-08
AT5G52280	0.322161	1.11496e-42
AT3G59690	0.322719	6.89928e-07
AT2G04110	0.322815	2.11992e-29
AT1G29020	0.323574	2.31167e-15
AT3G52840	0.323708	4.66382e-16
AT3G14810	0.32414	0.000227904
AT3G61750	0.324528	0.000822971
AT1G41830	0.324892	7.8076e-51
AT1G26450	0.325426	2.97367e-08
AT1G68330	0.325955	4.92378e-16
AT2G47270	0.326216	5.66189e-38
AT4G28660	0.326414	2.14624e-08
AT5G43700	0.326803	1.22819e-64
AT1G01600	0.327358	8.96067e-07
AT3G56300	0.327438	0.000207218
AT5G40150	0.328065	4.89114e-05
AT4G11211	0.328642	2.36673e-09
AT2G12400	0.328645	5.82946e-28
AT2G36885	0.3294	4.63998e-09
AT4G23070	0.329476	7.87988e-06
AT5G49800	0.329737	3.48035e-18
AT2G02990	0.330049	0.000131702
AT3G56980	0.330087	8.48765e-05
AT3G12110	0.330411	2.64053e-35
AT3G10525	0.330785	7.04343e-20
AT1G22065	0.330869	0.000111337
AT1G48660	0.331315	0.00449336
AT4G04460	0.331605	3.08315e-15
AT3G26818	0.332037	0.00724007
AT2G46660	0.332192	4.79807e-11
AT5G05250	0.332347	1.00417e-06
AT4G06536	0.332535	0.00294408
AT4G23800	0.332763	2.06527e-09
AT2G24440	0.333006	0.00304907
AT3G23930	0.33313	4.74015e-13
AT5G03150	0.333934	6.37017e-44
AT3G05920	0.333986	1.31019e-38
AT4G12330	0.334481	1.84344e-05
AT5G57685	0.335346	5.21164e-16
AT4G27030	0.335995	7.67291e-05
AT3G06990	0.336272	4.50915e-14
AT3G50840	0.336337	1.45533e-08
AT3G54510	0.336487	1.64737e-35
AT2G11300	0.336899	0.00147123
AT4G29240	0.33729	1.63645e-06
AT4G15160	0.337444	4.74938e-18
AT1G14190	0.337912	0.00266483
AT3G60840	0.338138	0.00251103
AT5G50940	0.338465	0.00214823
AT5G38005	0.338752	3.04553e-09
AT3G61160	0.339169	7.13581e-17
AT2G25060	0.33918	8.54369e-05
AT1G32170	0.33969	7.09647e-61
AT4G32350	0.340171	2.39801e-32
AT4G27100	0.341014	4.33291e-25
AT1G33480	0.341467	7.03287e-09
AT1G67265	0.341641	1.27718e-37
AT4G09160	0.341997	6.18757e-42
AT2G20980	0.342048	0.00512762
AT4G30400	0.342617	8.10175e-23
AT4G19645	0.342854	0.000164836
AT1G68110	0.34356	1.48467e-07
AT1G62660	0.344096	5.00592e-42
AT4G21850	0.344338	2.22372e-27
AT1G61255	0.344564	1.36463e-13
AT1G72790	0.344663	6.5577e-36
AT5G67090	0.344787	1.68051e-06
AT4G37700	0.344887	5.50103e-05
AT5G44005	0.345284	0.00169424
AT4G34790	0.345364	0.000944992
AT2G42900	0.345409	1.93462e-32
AT5G54510	0.345578	1.26916e-13
AT3G09710	0.345713	2.80278e-11
AT2G28950	0.345972	2.3875e-21
AT1G26230	0.345991	4.38801e-17
AT1G54200	0.346109	2.26912e-06
AT5G05090	0.346221	9.43337e-11
AT1G68780	0.346235	2.58789e-12
AT1G14280	0.346263	8.18549e-18
AT4G16780	0.346558	4.12077e-29
AT2G42990	0.346824	0.00239582
AT4G01460	0.347761	7.94939e-11
AT4G27840	0.347829	1.28423e-09
AT2G21720	0.347976	0.00015222
AT4G24790	0.348144	1.36962e-05
AT4G14290	0.348275	1.09352e-16
AT1G11000	0.34879	5.26983e-28
AT2G36830	0.34946	1.35883e-63
AT4G22810	0.349788	1.36478e-28
AT1G04520	0.350327	3.7057e-06
AT5G08020	0.350591	0.00203685
AT5G41140	0.350711	3.64036e-23
AT4G12830	0.350918	0.00957108
AT5G44030	0.351023	1.01565e-13
AT2G41850	0.351027	3.58004e-31
AT5G60020	0.351391	6.05519e-08
AT3G62630	0.351448	6.23951e-19
AT4G02290	0.351682	1.79696e-21
AT5G56880	0.351795	6.15222e-05
AT1G22110	0.351985	6.36601e-11
AT5G06150	0.352107	0.000628636
AT5G65310	0.352663	2.03787e-41
AT3G57680	0.352718	0.00933912
AT5G08370	0.353376	1.68016e-19
AT2G25625	0.354299	0.00779586
AT2G04039	0.354896	0.000167859
AT3G52561	0.354917	1.83073e-08
AT2G28040	0.355001	0.00794522
AT4G09350	0.355539	0.0028706
AT4G06534	0.355625	2.4515e-05
AT3G55840	0.355631	7.58286e-27
AT1G06930	0.355769	0.000218831
AT5G63800	0.355778	6.334e-30
AT3G54020	0.355912	1.01477e-20
AT5G04140	0.355979	3.17808e-14
AT1G76090	0.356167	2.59145e-30
AT3G53210	0.356232	4.42738e-08
AT3G02730	0.357699	2.78948e-07
AT3G23610	0.35784	9.44533e-06
AT4G08290	0.357906	1.35491e-34
AT5G24780	0.357928	0.00353953
AT1G27120	0.3584	5.70392e-10
AT5G67020	0.358824	0.00016711
AT2G39010	0.35886	9.53625e-55
AT4G23500	0.359273	1.06096e-14
AT3G25710	0.359291	6.41639e-10
AT5G57040	0.359836	1.02766e-17
AT4G00820	0.359982	2.14761e-25
AT4G32770	0.360054	0.0023306
AT2G32280	0.360297	1.44898e-14
AT5G22355	0.360534	9.75375e-13
AT4G35970	0.360679	1.61491e-05
AT5G65390	0.360688	6.7508e-49
AT1G74090	0.361668	2.00968e-14
AT5G12260	0.361864	9.32704e-27
AT4G24710	0.362735	7.23779e-05
AT2G15400	0.362918	0.0085585
AT4G08160	0.362956	3.17564e-07
AT2G39050	0.363377	0.0042143
AT5G11550	0.363545	4.69696e-14
AT1G12260	0.363588	0.000181401
AT3G01220	0.364019	5.77539e-23
AT1G09460	0.364086	3.68959e-49
AT3G16250	0.364242	2.0193e-08
AT3G02000	0.364699	0.00888649
AT3G24650	0.364816	5.47056e-13
AT5G08350	0.364859	3.08749e-33
AT1G19150	0.365156	2.95066e-17
AT2G38320	0.365279	1.40591e-07
AT5G50175	0.365678	0.00105834
AT1G17620	0.365832	2.33301e-42
AT1G20440	0.366148	4.28244e-59
AT3G20570	0.366216	1.66676e-10
AT3G45280	0.366959	0.000346923
AT1G09480	0.368088	4.1702e-11
AT3G63440	0.368322	3.94553e-10
AT1G19510	0.368381	1.18381e-13
AT5G25140	0.36845	1.81163e-11
AT3G63120	0.368454	5.05505e-28
AT3G23340	0.368501	1.05012e-11
AT2G24820	0.368558	1.73629e-15
AT3G52720	0.369174	0.000311377
AT5G03860	0.369288	0.000378012
AT5G55480	0.369407	4.79862e-25
AT5G40020	0.369776	0.00628255
AT4G38700	0.370184	0.00982925
AT5G03370	0.370825	0.000531947
AT1G70710	0.370887	6.34697e-36
AT1G20020	0.370969	4.54314e-12
AT1G10740	0.371231	1.021e-44
AT3G62270	0.37135	1.12286e-26
AT2G26640	0.371512	9.90128e-18
AT3G07540	0.371594	6.78309e-17
AT5G15180	0.371605	3.98421e-11
AT4G22520	0.372219	0.00540365
AT2G16850	0.372263	5.49602e-08
AT3G28345	0.372343	2.77754e-22
AT2G18180	0.372975	0.00892239
AT4G17350	0.37322	4.36584e-11
AT4G13620	0.373538	9.15668e-12
AT1G11735	0.373798	9.06497e-05
AT2G40480	0.374494	7.4449e-08
AT3G12710	0.374601	2.70454e-39
AT4G11820	0.374745	5.05847e-17
AT3G50640	0.374778	1.81099e-08
AT3G18260	0.375338	3.70373e-05
AT1G56720	0.375519	1.07568e-34
AT1G75580	0.375683	0.000647293
AT4G39970	0.376305	1.16081e-18
AT1G17700	0.376449	1.16089e-12
AT5G07720	0.376582	9.51578e-05
AT1G64690	0.37674	4.74907e-07
AT3G45700	0.37697	3.40189e-13
AT5G25460	0.377053	3.41908e-31
AT2G40300	0.377541	3.68656e-06
AT2G04780	0.377684	1.68833e-34
AT1G22470	0.377692	5.11726e-08
AT5G08330	0.377921	7.33616e-22
AT5G57000	0.378167	3.79899e-11
AT5G65510	0.378193	0.00152008
AT1G57570	0.378287	5.36773e-07
AT4G31140	0.378403	4.58936e-16
AT1G68740	0.378558	0.00902893
AT5G16340	0.37861	1.70722e-05
AT1G54820	0.37874	0.000216006
AT1G64480	0.378807	0.00765301
AT1G49470	0.379144	3.54792e-09
AT4G34980	0.379174	1.03559e-31
AT3G28740	0.379273	8.71027e-39
AT3G01410	0.379872	0.000593786
AT2G28410	0.380276	1.17761e-05
AT4G35560	0.380668	7.70256e-32
AT3G55630	0.380756	3.89757e-11
AT4G33580	0.380778	6.28922e-06
AT5G28913	0.380868	4.81102e-05
AT3G49360	0.381896	1.47369e-27
AT1G22460	0.382153	0.00133115
AT1G52540	0.382283	3.03244e-25
AT2G21340	0.382963	0.00386975
AT1G44160	0.382971	2.39734e-09
AT5G12940	0.383663	1.24444e-09
AT1G66450	0.383716	0.000338271
AT1G72200	0.384557	2.65422e-12
AT4G39700	0.384605	2.43836e-05
AT5G15350	0.384686	3.87598e-45
AT4G26520	0.38469	1.42546e-11
AT5G06400	0.384818	0.000241254
AT3G56810	0.384897	1.76289e-08
AT5G52120	0.384917	1.06585e-10
AT1G20160	0.385028	1.57499e-17
AT3G08600	0.385149	5.38086e-16
AT2G01530	0.385228	1.00655e-15
AT2G37170	0.385475	1.81218e-54
AT3G53190	0.385549	1.43612e-06
AT2G21830	0.385711	6.00664e-15
AT3G14170	0.385812	5.95938e-05
AT2G35860	0.3859	1.14056e-19
AT3G13720	0.386036	3.61435e-33
AT3G52180	0.386188	0.000924377
AT3G51325	0.386589	0.00379178
AT2G02130	0.386738	7.39242e-40
AT1G30280	0.386779	2.25956e-06
AT1G08310	0.387024	1.48694e-05
AT3G44020	0.387063	3.47462e-05
AT3G18773	0.387217	2.03159e-17
AT5G53020	0.387374	1.13027e-16
AT3G62930	0.387381	9.54259e-05
AT5G67280	0.387637	4.48155e-10
AT1G69530	0.387766	2.64489e-20
AT1G67840	0.388191	0.00193979
AT5G20635	0.388668	1.58504e-06
AT3G05640	0.388809	1.01921e-21
AT2G25450	0.388856	8.06366e-13
AT2G36145	0.389451	5.21992e-05
AT3G59340	0.390095	0.00637669
AT5G55050	0.390264	1.54452e-12
AT1G55480	0.390297	4.30999e-15
AT5G48230	0.390359	4.18808e-41
AT3G19800	0.39039	2.07363e-06
AT5G18690	0.390995	1.86629e-12
AT3G48420	0.390999	1.34084e-08
AT1G31050	0.391163	1.03919e-07
AT1G15050	0.391333	2.78668e-05
AT5G05965	0.39136	2.74031e-25
AT3G05910	0.392191	7.88704e-45
AT5G51560	0.392209	5.99225e-14
AT3G56620	0.393512	0.000665021
AT2G34080	0.393612	0.0017491
AT5G02020	0.394251	2.25032e-49
AT5G36260	0.394391	0.00625511
AT5G23840	0.394876	0.000283755
AT3G52780	0.395542	3.91483e-05
AT1G02770	0.395812	0.00597125
AT1G27030	0.395841	1.66141e-20
AT5G65610	0.39647	9.88961e-07
AT2G19760	0.396944	6.95645e-44
AT1G61260	0.397597	1.24107e-06
AT4G22730	0.397847	3.75655e-07
AT2G39470	0.397868	3.29009e-08
AT1G68440	0.398076	1.7573e-41
AT2G35880	0.398349	2.13395e-42
AT4G38770	0.398466	7.32457e-22
AT1G21880	0.398572	2.11799e-21
AT1G15980	0.399146	5.61288e-05
AT1G17430	0.399251	1.94132e-16
AT1G12500	0.399274	3.71624e-17
AT4G13310	0.399772	5.47692e-08
AT3G20130	0.40036	1.10867e-17
AT4G17180	0.400758	2.80156e-07
AT2G45820	0.400797	1.07342e-46
AT5G26740	0.400945	1.76304e-46
AT4G17170	0.401406	1.27281e-43
AT1G15080	0.401485	0.000809009
AT3G02820	0.402139	0.00229298
AT4G14550	0.402271	4.58296e-21
AT2G23910	0.402424	0.0011711
AT5G24140	0.402474	0.00169736
AT1G23460	0.402612	9.3152e-11
AT5G47640	0.402673	8.50418e-23
AT5G43040	0.402819	1.10851e-06
AT5G51670	0.403064	3.50265e-21
AT1G01120	0.403096	2.39483e-18
AT4G23670	0.403153	8.87108e-22
AT3G18040	0.40413	8.75414e-20
AT2G45490	0.404194	0.00293212
AT5G57970	0.4044	1.5804e-15
AT4G39330	0.404433	1.53004e-23
AT4G32830	0.404887	3.25781e-05
AT5G42250	0.404888	1.75267e-16
AT5G12250	0.40634	3.05754e-46
AT2G34620	0.406634	0.000314577
AT5G50890	0.406719	0.000716142
AT3G43270	0.406821	1.78826e-24
AT2G39180	0.407258	1.47005e-24
AT5G15580	0.407313	1.63802e-38
AT5G54270	0.407841	3.459e-08
AT3G29375	0.407881	8.45023e-11
AT5G66460	0.408383	3.73144e-12
AT4G28310	0.408394	0.000818618
AT4G37930	0.408514	9.70711e-12
AT3G47620	0.408516	2.9029e-25
AT3G46780	0.40874	2.38365e-09
AT5G59020	0.409051	0.000178356
AT1G15550	0.4092	3.06655e-09
AT1G65230	0.409369	1.16879e-14
AT5G56720	0.409645	0.00350811
AT1G78090	0.409646	0.00404754
AT2G42600	0.409868	0.00020596
AT3G13520	0.410112	3.67522e-43
AT2G02700	0.410216	0.00336145
AT2G13820	0.410377	1.07457e-13
AT5G19970	0.410475	5.21561e-07
AT5G39210	0.410692	1.94623e-05
AT3G59140	0.410726	6.15202e-08
AT1G14920	0.41074	9.0441e-29
AT1G19670	0.4109	0.00214989
AT1G75460	0.411045	5.45706e-06
AT3G28880	0.411324	6.18883e-06
AT1G23000	0.411445	9.01796e-13
AT2G12190	0.411565	0.00112329
AT5G60120	0.411635	3.42121e-09
AT4G20320	0.411758	4.79313e-36
AT5G59260	0.411845	2.98644e-05
AT5G48920	0.412579	0.000258076
AT1G31935	0.412683	5.5777e-12
AT2G27970	0.412822	1.0014e-05
AT2G28620	0.412832	0.00522123
AT1G25510	0.413292	0.00394821
AT4G12980	0.413501	1.01083e-09
AT1G67710	0.413675	1.69202e-17
AT5G60610	0.413899	0.00138722
AT5G55850	0.413997	2.81773e-40
AT3G15690	0.41426	4.48573e-06
AT5G50915	0.414442	9.91708e-07
AT1G29520	0.414576	3.74244e-15
AT5G55470	0.414644	3.38603e-05
AT2G22122	0.414658	1.70501e-16
AT4G04850	0.414785	2.88132e-10
AT1G52290	0.415616	2.39429e-05
AT5G02760	0.415735	1.59404e-12
AT4G03330	0.415854	0.00119024
AT1G28130	0.41628	3.39681e-24
AT5G03520	0.416893	1.84439e-37
AT1G14730	0.416958	3.21645e-11
AT1G15410	0.417426	6.2157e-22
AT3G63200	0.418104	1.46364e-10
AT3G61930	0.418151	4.88474e-05
AT3G56480	0.418162	2.25315e-29
AT1G76540	0.41818	2.89534e-05
AT5G54585	0.418182	1.85975e-07
AT4G18270	0.41831	0.00916022
AT3G55760	0.418544	3.43488e-05
AT5G11070	0.418822	1.8087e-25
AT5G58260	0.418957	1.10486e-10
AT3G21550	0.419102	8.63835e-06
AT2G36410	0.41919	6.1874e-34
AT2G28350	0.419207	6.58704e-24
AT5G44060	0.419218	1.24159e-14
AT5G59000	0.41946	2.60566e-08
AT3G06750	0.420886	1.04939e-28
AT1G23030	0.421369	3.73725e-27
AT1G47740	0.421469	1.68951e-33
AT1G70940	0.421797	1.08613e-39
AT2G26830	0.422096	1.70788e-14
AT5G40140	0.422441	5.81253e-05
AT3G08030	0.422461	9.58549e-39
AT4G18810	0.423198	6.98794e-18
AT2G24300	0.42353	3.78974e-21
AT4G29700	0.423927	2.58081e-13
AT4G37310	0.424242	0.00115544
AT3G06070	0.424332	2.78323e-31
AT5G51720	0.424734	0.00357157
AT1G18280	0.425035	3.79704e-16
AT3G62060	0.425178	1.82663e-09
AT5G40890	0.425235	1.03157e-37
AT1G70830	0.425554	3.82103e-40
AT2G30360	0.425741	9.66669e-08
AT3G03170	0.426489	2.60907e-09
AT3G02620	0.426632	8.13195e-13
AT5G03960	0.426654	3.18635e-15
AT5G17520	0.426754	4.9145e-05
AT3G17070	0.426762	4.57852e-06
AT5G43760	0.426866	1.48105e-22
AT4G01200	0.427509	0.000445989
AT1G20610	0.42763	0.000372096
AT2G05518	0.4278	0.000126364
AT3G59490	0.428004	7.69206e-05
AT5G44680	0.428172	7.25561e-13
AT1G50890	0.428774	8.96844e-12
AT2G47440	0.428792	7.65685e-34
AT5G24040	0.42895	0.00577083
AT4G28040	0.429201	1.19627e-35
AT1G19300	0.429387	4.05657e-09
AT3G52900	0.429784	0.000641221
AT1G72470	0.429836	9.23188e-13
AT2G01660	0.430092	1.9711e-09
AT2G41475	0.430104	1.163e-13
AT4G32890	0.430545	1.28184e-10
AT1G43790	0.430951	0.000121112
AT2G25220	0.430976	1.99064e-07
AT1G14430	0.431156	0.00318143
AT2G40900	0.431269	1.12414e-10
AT2G41300	0.43136	0.00613199
AT4G39710	0.431395	2.13691e-11
AT5G57830	0.431478	1.67861e-11
AT2G30460	0.431487	2.47348e-10
AT2G34560	0.431565	1.15526e-24
AT4G30420	0.431836	4.82712e-06
AT1G21500	0.431884	3.03651e-10
AT1G15210	0.432521	7.71544e-08
AT5G37260	0.43302	8.54101e-32
AT3G11050	0.433428	0.000311513
AT2G28310	0.433498	1.96072e-22
AT3G18490	0.433655	3.47904e-14
AT5G62550	0.433782	0.00325938
AT2G03480	0.433809	1.0453e-11
AT3G60630	0.433872	2.62046e-24
AT5G49630	0.434027	1.80202e-08
AT4G22570	0.434259	1.42651e-10
AT4G38050	0.434447	1.14812e-05
AT5G21950	0.434636	0.00116466
AT5G56810	0.435419	0.00562992
AT3G50820	0.435799	1.02011e-05
AT5G08360	0.435872	0.00258778
AT4G00700	0.43699	1.70734e-07
AT1G32583	0.437522	2.67992e-05
AT3G60220	0.437893	3.21124e-10
AT1G23205	0.438036	0.00773687
AT3G27500	0.438337	5.49797e-05
AT2G42300	0.438495	3.29244e-25
AT1G58370	0.438508	2.42292e-07
AT5G26720	0.438832	0.000798053
AT1G18730	0.439088	2.82185e-09
AT1G02180	0.439415	0.000110374
AT3G52910	0.439982	0.000201929
AT5G18970	0.440178	3.68869e-13
AT1G35460	0.440625	1.77524e-13
AT1G11130	0.441224	0.00017279
AT3G50650	0.441413	1.92909e-16
AT2G40320	0.441775	0.00140426
AT5G02890	0.442022	9.43078e-17
AT3G50280	0.442383	0.00214996
AT1G67830	0.442556	5.33044e-11
AT3G48260	0.442717	8.86891e-24
AT3G04630	0.44325	2.58008e-16
AT2G26360	0.443371	0.00011343
AT5G25190	0.443419	1.54137e-07
AT4G31840	0.443471	0.00417133
AT3G09760	0.444409	7.57369e-13
AT1G06490	0.444508	2.27324e-05
AT1G68540	0.444995	4.6776e-06
AT5G66005	0.445281	0.00142486
AT5G65990	0.445321	4.27312e-08
AT1G77700	0.445526	0.00116285
AT3G22760	0.445732	0.00058889
AT1G22910	0.446087	3.61095e-25
AT4G35880	0.44621	1.05043e-08
AT2G37300	0.446374	0.00550814
AT3G04140	0.446567	0.00366559
AT3G15800	0.446655	0.00193009
AT3G23805	0.447072	3.8476e-08
AT3G62590	0.447626	0.00114681
AT4G23000	0.44795	0.004085
AT5G05960	0.447982	0.000291965
AT2G36310	0.448242	3.1257e-26
AT1G07590	0.448598	5.04038e-18
AT3G21010	0.448798	0.00183698
AT4G35470	0.448838	3.55216e-31
AT2G34190	0.449189	2.66075e-06
AT1G74660	0.449266	9.81059e-11
AT5G40980	0.44938	2.74561e-05
AT3G29280	0.450053	0.00576236
AT1G27880	0.450177	0.00550262
AT5G62100	0.450285	2.85117e-07
AT1G05900	0.450384	2.49046e-09
AT2G22670	0.450446	3.16725e-30
AT3G54120	0.450486	1.44587e-07
AT4G31590	0.450889	1.15037e-27
AT3G52290	0.450954	3.53567e-25
AT3G01420	0.451159	1.22113e-31
AT5G48910	0.451427	1.734e-06
AT3G58100	0.452071	7.25647e-05
AT1G72760	0.452216	0.00124609
AT5G44410	0.452464	8.78544e-11
AT5G42100	0.452645	1.09338e-25
AT2G21330	0.452944	1.94159e-09
AT1G22170	0.453369	2.40754e-05
AT2G01830	0.453499	3.8454e-17
AT3G61820	0.453723	6.18076e-10
AT1G74458	0.454221	1.22224e-11
AT1G23060	0.454463	8.37377e-11
AT1G29050	0.454506	2.13335e-22
AT1G64110	0.455033	2.56173e-31
AT4G22010	0.455121	1.24564e-25
AT2G32640	0.455576	0.000627069
AT5G51850	0.455662	0.0015822
AT4G09750	0.455894	0.00798251
AT5G52950	0.455941	0.00169139
AT1G72030	0.456042	7.21255e-06
AT5G38520	0.456296	2.53761e-21
AT3G54050	0.456548	4.16685e-07
AT1G14520	0.456622	2.79936e-06
AT3G15890	0.45689	1.70187e-06
AT2G39900	0.456944	9.32502e-15
AT2G16990	0.456995	6.93252e-06
AT2G22850	0.457198	6.50242e-06
AT1G53520	0.457278	4.41971e-08
AT3G51970	0.457315	6.31646e-05
AT5G67200	0.457326	6.44629e-05
AT5G54190	0.457561	1.05095e-37
AT4G18760	0.45771	4.08769e-13
AT4G12450	0.457877	0.00134535
AT1G11440	0.45808	8.79198e-10
AT2G25000	0.458454	8.80286e-06
AT4G14150	0.458628	0.00337389
AT1G78700	0.45864	3.02526e-15
AT4G37110	0.458762	4.58358e-11
AT1G79700	0.458814	7.7686e-23
AT1G15040	0.459015	1.87468e-29
AT5G52910	0.459121	0.00170605
AT3G17680	0.45931	0.00389655
AT2G32430	0.459366	6.30862e-11
AT5G53660	0.459443	3.09399e-23
AT1G64440	0.459673	3.4114e-17
AT5G52060	0.459682	4.81721e-24
AT1G30520	0.460055	4.33687e-05
AT1G17140	0.460276	3.62405e-13
AT1G22530	0.460425	1.90808e-22
AT2G01260	0.460491	1.11836e-18
AT4G36540	0.460985	1.51848e-27
AT4G25290	0.461127	2.65747e-07
AT1G52565	0.461308	0.00314724
AT5G59580	0.461572	0.000536596
AT1G14290	0.461612	1.97399e-14
AT5G59900	0.46236	0.00886379
AT1G58520	0.462509	2.71437e-10
AT3G03450	0.462727	0.000120517
AT5G23790	0.463111	0.00626438
AT4G32710	0.463172	4.39267e-09
AT5G23870	0.463268	4.38047e-22
AT2G24350	0.46375	0.000823009
AT4G35100	0.463976	8.97336e-37
AT2G38695	0.464273	0.000872545
AT4G16790	0.464832	9.57342e-12
AT3G61430	0.464931	1.41811e-36
AT3G22425	0.465142	1.12885e-07
AT5G59050	0.465606	3.39751e-05
AT1G10360	0.465744	6.65533e-07
AT1G29100	0.465901	8.21079e-09
AT1G20480	0.46622	0.00137443
AT4G37320	0.466321	1.04796e-08
AT1G47655	0.466653	0.000261223
AT3G55880	0.466792	2.62311e-14
AT5G62170	0.466859	7.28071e-09
AT1G23530	0.466938	0.00449496
AT2G26870	0.467125	0.000536454
AT5G01630	0.467484	0.000266699
AT3G05150	0.467574	1.03235e-28
AT1G18200	0.46758	1.27231e-07
AT4G21215	0.467899	9.89967e-11
AT1G27460	0.467951	1.29222e-16
AT1G23730	0.468111	0.00122764
AT2G30160	0.46823	1.39404e-10
AT4G21730	0.468618	0.00021485
AT3G52940	0.468656	1.04479e-12
AT1G02670	0.468873	4.54775e-05
AT5G13700	0.46889	0.000259008
AT1G27950	0.469158	6.05389e-13
AT1G10750	0.46981	0.000714837
AT5G44010	0.469849	0.000297324
AT3G25900	0.469861	1.3791e-25
AT2G29890	0.469877	6.91772e-12
AT1G80760	0.470217	2.87938e-06
AT3G46490	0.470339	0.00152345
AT5G50740	0.47048	0.00919169
AT2G31110	0.470555	1.07042e-09
AT1G05260	0.471532	3.77991e-09
AT4G37540	0.471638	1.49332e-20
AT2G33180	0.47178	4.8746e-07
AT5G16770	0.471978	9.96263e-05
AT5G07250	0.472095	1.34231e-15
AT1G02700	0.472422	0.00112705
AT5G20270	0.472453	2.15947e-15
AT1G15380	0.472544	3.70181e-31
AT2G17650	0.472597	7.92452e-05
AT5G15530	0.472682	7.87586e-05
AT3G56370	0.473355	5.47612e-14
AT3G29140	0.473447	0.00127407
AT3G43430	0.474005	5.17378e-18
AT5G40060	0.474025	0.000396662
AT2G35210	0.474441	8.4424e-05
AT3G63450	0.474478	0.00343339
AT2G39890	0.475147	2.80648e-11
AT3G50340	0.475776	4.03757e-08
AT1G49240	0.475789	3.11512e-34
AT1G05360	0.476104	5.04184e-08
AT2G42220	0.476184	9.45952e-13
AT5G05810	0.476212	0.000223349
AT2G06925	0.477328	8.48332e-07
AT2G42820	0.477968	0.00214827
AT5G11690	0.477996	6.98546e-05
AT5G62880	0.478062	1.64784e-20
AT1G62710	0.478084	0.000560418
AT3G45960	0.478099	0.00247314
AT1G02660	0.478784	2.32028e-14
AT1G69526	0.478874	1.17977e-06
AT1G52100	0.478897	1.86311e-11
AT3G52920	0.479636	4.55576e-20
AT4G28740	0.480197	1.37681e-06
AT2G35130	0.480366	5.36018e-12
AT4G39660	0.480447	3.16023e-29
AT5G47630	0.481021	0.000175858
AT3G54000	0.481077	2.86363e-09
AT1G69310	0.481373	3.56939e-07
AT1G31880	0.481399	1.41052e-05
AT4G33220	0.481526	3.19044e-12
AT1G59850	0.481637	0.00133473
AT5G43750	0.48172	2.15255e-06
AT2G17990	0.481821	7.6339e-23
AT5G57090	0.482022	1.13314e-17
AT1G18400	0.482319	1.47752e-20
AT3G14940	0.482381	3.03193e-05
AT1G13920	0.482582	5.45418e-05
AT1G19940	0.482757	0.00948927
AT4G36270	0.483157	0.000913677
AT3G18750	0.483402	2.27097e-05
AT5G16360	0.483708	4.03605e-14
AT3G04980	0.483917	0.00292967
AT2G21195	0.48408	3.58604e-11
AT5G53280	0.484168	0.00643236
AT4G12970	0.484181	4.81277e-11
AT1G64680	0.484338	1.08369e-08
AT1G52570	0.484407	0.00318095
AT5G62580	0.484554	1.13022e-11
AT4G30940	0.48466	0.000133689
AT5G65470	0.484673	2.90879e-18
AT5G11000	0.484678	5.74062e-22
AT2G22170	0.484772	2.97617e-24
AT3G17100	0.484854	1.35718e-25
AT1G44608	0.485378	1.07265e-08
AT5G42110	0.485728	3.41868e-05
AT3G20830	0.485857	1.57755e-09
AT1G64220	0.48593	0.00774627
AT5G45380	0.48606	9.04218e-13
AT2G43290	0.486235	4.03951e-21
AT3G22150	0.486671	5.93131e-21
AT5G50720	0.486875	9.06325e-09
AT2G46290	0.487131	0.00567004
AT1G08590	0.487378	1.67431e-16
AT3G61900	0.487528	0.000283054
AT4G10340	0.487968	2.51893e-09
AT1G49740	0.488101	1.83834e-13
AT4G39380	0.488117	0.00467222
AT3G48970	0.488775	3.94344e-08
AT3G19300	0.488813	0.00271254
AT4G31910	0.488833	3.35375e-05
AT1G35612	0.48886	5.21376e-16
AT2G05540	0.489007	8.05884e-31
AT1G18250	0.489274	0.0079916
AT1G14185	0.489308	0.00416085
AT5G20970	0.48934	2.2268e-06
AT1G52230	0.489374	7.01272e-09
AT4G00370	0.489398	1.18987e-20
AT1G76180	0.489433	3.08766e-31
AT4G18550	0.489799	0.000127321
AT1G09380	0.490092	0.000268199
AT5G10970	0.490294	0.000329188
AT2G47930	0.490459	3.87507e-10
AT1G64330	0.490651	3.72977e-12
AT1G19835	0.491193	2.88326e-20
AT1G01130	0.491244	0.00203363
AT1G69600	0.49149	3.58228e-09
AT5G17670	0.491619	1.66987e-10
AT4G16190	0.491795	8.24151e-08
AT1G20010	0.491995	1.3902e-24
AT3G08570	0.492867	0.000449047
AT5G55910	0.493029	5.79314e-24
AT1G16370	0.493207	1.10663e-13
AT5G02440	0.49354	4.26152e-13
AT1G04000	0.493622	2.38183e-07
AT4G24175	0.494173	0.00239684
AT4G20760	0.495014	2.03177e-05
AT5G50760	0.49503	3.31261e-05
AT2G34420	0.495214	2.21961e-06
AT4G37850	0.495227	6.72176e-06
AT1G56550	0.495331	1.10726e-08
AT1G78060	0.495748	3.82048e-09
AT5G55380	0.496036	0.00371367
AT3G04290	0.496066	3.11361e-05
AT2G27010	0.496228	3.37353e-07
AT1G52827	0.496265	8.35759e-11
AT4G28050	0.496365	3.76554e-16
AT5G24120	0.49638	0.000463599
AT1G13930	0.496442	1.37603e-09
AT3G19480	0.496512	3.32869e-05
AT3G24515	0.496588	0.000814534
AT3G16180	0.496936	3.35454e-18
AT1G42970	0.496984	1.11158e-08
AT1G14345	0.497028	3.5282e-10
AT1G04020	0.497216	0.00522664
AT4G29140	0.497412	1.95849e-09
AT1G11420	0.497485	0.00540996
AT2G28470	0.497679	0.000507273
AT1G13970	0.497693	0.000329428
AT5G25370	0.497841	0.00447342
AT5G18930	0.497942	0.000499757
AT1G09000	0.498506	0.0018211
AT5G47900	0.49853	6.34544e-09
AT4G20140	0.498558	1.22918e-15
AT5G20140	0.49911	8.34832e-08
AT1G70230	0.499185	1.95179e-10
AT3G61550	0.499353	1.31831e-06
AT3G62110	0.499428	1.98346e-10
AT4G22990	0.499526	5.19543e-08
AT1G44575	0.499596	3.84015e-11
AT3G20470	0.499645	3.13762e-12
AT1G09250	0.499673	2.56775e-17
AT1G44800	0.499742	2.96072e-21
AT2G44910	0.499859	0.00738206
AT3G50980	0.499988	4.78818e-05
AT3G48740	0.500009	1.41781e-28
AT2G29650	0.500052	7.47022e-09
AT1G13090	0.500257	2.48087e-07
AT5G61810	0.500269	3.37437e-05
AT1G03010	0.500528	0.0058218
AT5G58480	0.500571	2.4108e-06
AT1G44000	0.500821	3.2455e-12
AT3G53100	0.500851	5.94621e-10
AT2G21590	0.500919	0.000543888
AT5G54380	0.500965	2.56125e-15
AT3G02690	0.501097	8.84648e-14
AT5G60490	0.501628	0.00625042
AT4G33120	0.501758	7.73944e-13
AT1G79840	0.501813	3.83724e-08
AT3G45710	0.502008	0.00196424
AT1G08340	0.502189	0.000382904
AT1G50020	0.50231	0.000582475
AT5G48500	0.502536	7.3269e-05
AT2G41870	0.502638	1.15122e-07
AT4G02900	0.502888	1.26619e-06
AT3G15240	0.503264	0.000896515
AT1G30820	0.503515	9.51903e-24
AT5G35670	0.503531	8.38414e-08
AT2G29050	0.503581	4.94559e-07
AT2G05910	0.504047	0.000149071
AT5G60890	0.504466	0.000403832
AT2G31560	0.505428	6.44696e-05
AT5G56850	0.505448	1.79862e-06
AT3G21710	0.505544	5.18142e-12
AT3G10940	0.505547	0.000241058
AT4G38210	0.505709	0.00106754
AT4G04223	0.505799	0.00476441
AT4G00490	0.505805	1.17805e-06
AT5G02560	0.506032	1.11203e-07
AT4G05330	0.506177	8.98769e-11
AT4G34730	0.506243	9.22204e-09
AT1G17050	0.506286	9.5887e-06
AT5G37000	0.50685	0.00649524
AT4G24510	0.506899	3.34967e-23
AT3G29120	0.507008	2.52618e-05
AT5G45210	0.507153	0.00262723
AT3G06140	0.507175	1.35518e-05
AT4G16000	0.507217	5.88881e-14
AT2G18230	0.507248	1.24801e-05
AT4G38430	0.507738	1.89504e-10
AT1G07420	0.508057	7.63333e-13
AT2G26690	0.508218	1.13675e-07
AT1G62700	0.508436	0.00462493
AT1G78100	0.508447	6.13009e-17
AT1G24625	0.508595	3.82822e-11
AT1G31950	0.508723	4.44887e-10
AT4G25270	0.509493	1.5057e-07
AT3G60550	0.509622	3.12615e-05
AT2G28150	0.509627	6.86773e-13
AT4G18670	0.509679	1.54447e-16
AT3G45970	0.510087	1.89433e-24
AT4G09950	0.510133	0.000168971
AT5G13630	0.510138	9.08418e-09
AT2G32765	0.510151	0.00707296
AT2G46000	0.510152	7.63462e-05
AT4G12545	0.510722	0.00134216
AT2G38700	0.510787	6.08758e-19
AT5G07080	0.510822	3.33037e-15
AT3G17609	0.510843	4.5395e-05
AT5G63970	0.510943	7.45182e-11
AT5G42860	0.511088	5.26281e-06
AT2G02820	0.511204	4.03316e-10
AT4G33660	0.511313	3.86342e-05
AT3G56930	0.511502	6.36876e-15
AT5G25160	0.511583	0.000160827
AT4G23790	0.511593	9.0597e-09
AT5G57345	0.51243	1.19801e-07
AT1G12244	0.512581	0.000117711
AT4G05180	0.512619	2.06374e-07
AT1G07370	0.513118	0.00147125
AT3G16850	0.51312	2.68385e-17
AT5G01820	0.513154	2.68221e-13
AT4G25350	0.513243	0.000259042
AT3G17840	0.513305	1.43167e-06
AT4G03190	0.513819	7.07373e-21
AT3G54790	0.513936	6.95499e-11
AT3G60380	0.513975	2.17254e-10
AT1G55630	0.514095	0.000756253
AT5G14890	0.514419	0.00211162
AT2G21540	0.514461	3.58204e-19
AT1G76490	0.51471	1.75908e-16
AT3G16690	0.514827	1.93864e-13
AT5G19390	0.514866	3.68957e-21
AT4G22850	0.515127	2.75873e-05
AT4G21310	0.515427	5.43311e-05
AT1G32760	0.515596	1.36437e-05
AT1G66150	0.515611	2.32012e-24
AT5G17980	0.515682	5.86952e-05
AT2G22470	0.515778	2.17891e-14
AT4G04745	0.516712	1.46639e-07
AT4G12420	0.516856	2.28877e-26
AT1G18650	0.516946	3.58263e-14
AT1G18030	0.517152	1.54957e-15
AT5G17580	0.517801	0.000693583
AT3G02570	0.517813	2.82292e-13
AT2G03750	0.517894	0.00775549
AT4G04810	0.517915	0.00122916
AT3G06590	0.518121	1.68272e-16
AT3G19390	0.518156	3.9504e-11
AT2G26355	0.518328	2.12243e-18
AT1G65590	0.518724	5.81421e-09
AT3G63290	0.51883	0.0074776
AT1G05170	0.519211	2.05234e-08
AT5G13770	0.519271	1.81466e-13
AT1G16720	0.51958	6.94575e-07
AT5G20700	0.519759	7.76937e-15
AT3G59350	0.519948	2.62216e-15
AT1G76110	0.520606	0.00047704
AT5G59870	0.520713	2.69314e-10
AT5G07030	0.520839	2.06837e-10
AT2G33570	0.520969	1.57904e-17
AT2G22680	0.520999	7.94149e-19
AT3G18870	0.521319	0.000422738
AT2G28790	0.521471	2.08308e-07
AT5G57030	0.521478	9.59063e-15
AT1G14440	0.521693	3.77867e-08
AT3G13560	0.521858	8.30959e-06
AT5G22880	0.522048	2.47919e-09
AT5G11100	0.522419	4.34729e-08
AT1G04990	0.522683	4.22785e-11
AT4G23700	0.522989	9.71858e-06
AT5G51810	0.523098	0.00570128
AT1G72120	0.523271	0.000980198
AT2G30890	0.52359	0.000372234
AT1G74470	0.523655	6.32345e-23
AT3G57540	0.523874	0.00998735
AT3G01750	0.524027	5.89633e-08
AT3G24927	0.524123	7.63019e-13
AT3G27580	0.524186	2.97991e-14
AT2G30150	0.524719	7.88708e-09
AT4G15765	0.524791	0.000396685
AT2G41740	0.524818	3.27513e-19
AT2G34430	0.525032	0.00774775
AT3G19790	0.525143	0.000212774
AT1G05150	0.525422	1.35068e-18
AT3G01060	0.525827	0.00238617
AT1G07010	0.525896	6.37075e-07
AT4G34600	0.526062	1.74911e-11
AT1G21740	0.526792	3.0842e-06
AT4G31115	0.52726	6.97201e-06
AT1G67030	0.527303	0.000173848
AT1G02740	0.527306	0.0001935
AT1G76160	0.527433	3.95732e-20
AT1G49200	0.527555	2.35142e-08
AT5G54145	0.527558	2.42196e-06
AT5G66280	0.527647	1.81922e-08
AT5G54530	0.528177	0.000171388
AT3G05900	0.52828	1.01266e-15
AT2G04850	0.528445	0.000321035
AT2G38610	0.52846	9.05176e-12
AT4G22840	0.528524	0.00198801
AT4G01670	0.528614	0.000630575
AT4G37010	0.528668	4.56255e-09
AT5G58300	0.528878	1.31273e-14
AT1G15570	0.528887	5.42474e-05
AT4G14500	0.52889	1.97271e-19
AT4G36190	0.529136	2.48199e-10
AT5G67420	0.530133	2.99215e-20
AT4G28890	0.53014	3.38611e-05
AT3G23890	0.530314	0.000440311
AT3G05490	0.530367	7.37906e-18
AT5G07322	0.530543	0.00135461
AT2G05620	0.530728	4.28306e-14
AT3G27050	0.531077	4.26784e-07
AT4G00020	0.531186	0.0037481
AT1G77090	0.5313	1.65501e-07
AT4G18640	0.531509	4.94598e-08
AT2G24230	0.531699	3.36873e-08
AT5G60920	0.53178	9.97349e-23
AT5G03550	0.531877	0.00382765
AT5G02170	0.531887	0.00129144
AT4G29720	0.531897	7.82488e-07
AT3G07210	0.532141	2.37043e-10
AT4G30810	0.532231	9.81328e-09
AT5G55990	0.532238	2.98776e-05
AT1G18610	0.532587	5.05981e-08
AT1G30380	0.532974	6.30605e-06
AT1G48260	0.533282	1.88297e-07
AT3G24760	0.533535	3.2297e-05
AT3G23860	0.533541	0.00263958
AT2G35650	0.533594	4.42747e-11
AT5G49170	0.534157	0.00512051
AT3G19380	0.534457	7.43172e-05
AT1G02640	0.534498	6.50462e-23
AT2G26370	0.534681	2.32618e-07
AT1G22830	0.534931	0.00013155
AT4G35390	0.534982	0.00747726
AT1G06690	0.535039	9.81059e-05
AT3G61270	0.535387	0.000166832
AT3G03180	0.535463	1.4447e-08
AT3G54890	0.535792	3.17131e-07
AT1G19650	0.536098	1.04464e-05
AT2G44670	0.536414	1.3131e-13
AT4G37550	0.536449	2.39809e-14
AT3G16770	0.536479	2.06288e-24
AT3G54740	0.536645	1.39961e-07
AT3G02870	0.536694	0.00010255
AT5G59480	0.536913	9.41841e-09
AT4G12310	0.536926	8.05991e-06
AT1G22740	0.537003	8.21484e-17
AT5G08260	0.537201	8.40763e-09
AT2G20440	0.537233	4.5096e-06
AT3G14220	0.537305	5.22136e-13
AT4G20260	0.537801	3.69145e-24
AT1G01110	0.537857	1.99623e-05
AT2G34670	0.538179	3.32541e-06
AT2G04790	0.538204	0.000319752
AT5G15220	0.538278	4.76239e-09
AT3G54930	0.53869	0.000846566
AT3G53750	0.538869	5.81061e-08
AT5G41060	0.539141	1.49656e-12
AT2G16630	0.539395	0.00838331
AT1G73260	0.539547	5.21688e-18
AT5G07770	0.539641	6.19145e-08
AT4G01150	0.539689	8.91516e-13
AT2G33250	0.539844	1.94791e-06
AT5G41070	0.539925	7.44612e-10
AT5G09820	0.53998	2.58001e-07
AT1G68810	0.539989	6.57461e-08
AT3G57030	0.540387	5.2312e-05
AT3G08505	0.54045	2.48465e-05
AT4G29210	0.540498	1.83443e-05
AT1G30570	0.54096	3.89464e-14
AT3G26060	0.541311	5.44694e-06
AT1G67660	0.541312	0.00716156
AT2G19880	0.541403	1.41316e-09
AT1G47270	0.541464	8.91823e-12
AT3G29575	0.541482	4.49089e-18
AT1G18040	0.541668	0.000585635
AT1G64860	0.541848	3.04237e-06
AT4G26760	0.541907	3.56284e-09
AT4G28750	0.542038	0.000105949
AT1G06870	0.542203	6.10644e-05
AT5G48300	0.54255	2.78839e-05
AT1G69295	0.542745	3.60176e-15
AT3G06035	0.542759	0.00475266
AT5G49280	0.542875	3.98225e-07
AT3G61870	0.543112	0.000188671
AT3G21100	0.543377	2.67094e-07
AT2G19720	0.543407	0.00885286
AT5G08050	0.543945	6.45551e-05
AT5G14210	0.544097	1.9142e-12
AT1G03930	0.544139	1.24981e-13
AT1G71696	0.544166	2.4257e-06
AT3G21260	0.544322	4.05519e-11
AT5G08130	0.544733	2.39706e-17
AT4G27430	0.54494	1.02795e-17
AT3G09035	0.545131	8.80024e-08
AT4G22540	0.545555	2.34441e-15
AT5G59030	0.545592	3.70166e-13
AT4G30450	0.545755	7.87335e-08
AT4G36900	0.546352	1.50723e-14
AT3G21580	0.546778	0.000173535
AT1G74880	0.546917	1.53955e-15
AT3G11550	0.547118	5.97996e-07
AT3G21750	0.547444	0.000486325
AT2G29550	0.547466	1.1528e-18
AT3G25585	0.547514	6.00624e-16
AT1G64150	0.547664	1.16622e-05
AT5G01890	0.54829	1.00533e-08
AT4G29310	0.548779	1.06011e-11
AT4G31350	0.549015	1.51623e-07
AT1G20490	0.549303	1.45472e-06
AT1G28070	0.549439	0.00077123
AT3G50780	0.549534	2.81322e-12
AT5G41410	0.549613	0.00681009
AT1G21710	0.550375	8.21256e-08
AT2G24630	0.550466	3.4686e-06
AT1G66200	0.550598	3.02752e-18
AT3G53000	0.550744	3.93506e-09
AT3G19370	0.550773	8.18427e-05
AT1G49320	0.550814	8.94519e-08
AT1G15330	0.550889	7.87412e-11
AT3G47965	0.550918	5.37172e-05
AT2G37860	0.550989	1.30194e-07
AT5G19730	0.551034	0.000166766
AT3G09540	0.551212	0.00258203
AT5G58540	0.551244	1.10088e-11
AT3G04730	0.551418	5.45979e-21
AT3G05937	0.551592	3.84963e-06
AT3G05345	0.551691	0.00241407
AT1G47670	0.551701	1.2608e-08
AT1G11960	0.551807	4.33627e-06
AT4G30850	0.551989	2.5948e-10
AT5G26820	0.552114	1.00652e-15
AT1G52590	0.55295	0.000585895
AT5G44130	0.553158	3.41865e-18
AT3G15350	0.553289	8.27412e-06
AT1G08560	0.553297	0.00655838
AT2G05100	0.553398	6.8041e-14
AT1G64380	0.553463	2.42927e-07
AT1G79270	0.553473	6.6754e-14
AT5G17400	0.553668	2.16995e-12
AT4G01430	0.553788	0.002026
AT1G19450	0.554047	1.57901e-11
AT1G67590	0.554249	1.06959e-10
AT1G08320	0.555105	4.18615e-09
AT3G45230	0.555306	1.58522e-05
AT2G41170	0.555777	2.81434e-07
AT2G31900	0.555851	2.65264e-09
AT5G13640	0.555951	7.15516e-14
AT2G20550	0.555952	0.000171718
AT5G58320	0.556048	1.21745e-10
AT3G53840	0.556125	0.00635886
AT1G54010	0.55631	0.00757594
AT3G17185	0.556968	0.00349897
AT3G18090	0.557078	0.00451901
AT5G48360	0.557206	1.99907e-05
AT3G26085	0.557272	3.04661e-06
AT1G26650	0.557611	2.68781e-09
AT3G51710	0.557715	0.00734371
AT5G43830	0.557937	5.93901e-20
AT5G35970	0.558165	1.55076e-09
AT3G14560	0.558293	2.16351e-08
AT1G62990	0.558485	0.000548117
AT5G26150	0.558818	2.45734e-05
AT4G24670	0.559186	0.00142928
AT2G22800	0.559824	0.000106795
AT2G05070	0.56003	1.51709e-06
AT1G30440	0.560078	1.8653e-14
AT4G25780	0.560407	7.42941e-05
AT1G14030	0.560535	1.07642e-09
AT3G17090	0.560592	7.76057e-14
AT5G01090	0.560612	5.16919e-08
AT5G57780	0.560705	1.64519e-05
AT1G08380	0.560849	1.22234e-05
AT3G10320	0.561238	0.00461679
AT1G29930	0.561295	0.000608705
AT5G45940	0.561709	1.06577e-05
AT1G63240	0.561725	8.09263e-08
AT4G33640	0.562072	6.26694e-14
AT5G13730	0.56211	0.000114759
AT2G43060	0.562229	2.51457e-10
AT3G09580	0.562475	5.73413e-07
AT3G08040	0.562721	0.000859259
AT1G31258	0.562788	0.00604367
AT3G61200	0.562829	1.02322e-05
AT3G17120	0.563257	3.71151e-05
AT2G44830	0.563503	0.000180422
AT2G46970	0.56351	1.54654e-08
AT1G20450	0.563621	4.7436e-07
AT5G01830	0.563674	9.62097e-11
AT5G03545	0.56382	0.00182126
AT4G34960	0.564093	8.54301e-08
AT4G14490	0.564144	0.000379315
AT1G16090	0.564196	0.000117497
AT3G03900	0.564565	0.000690947
AT5G46700	0.564598	1.32257e-05
AT1G25440	0.564766	1.32029e-07
AT1G07780	0.56478	0.0022793
AT3G25930	0.564836	2.51189e-05
AT1G75680	0.564845	1.38157e-17
AT3G06060	0.564855	3.93099e-12
AT3G47360	0.564906	4.58265e-09
AT2G02780	0.564952	2.77308e-12
AT5G63920	0.565012	0.00134643
AT3G54560	0.565229	5.37244e-05
AT2G05590	0.565261	1.32011e-08
AT1G48610	0.565291	3.07642e-07
AT3G29639	0.565507	0.00227689
AT2G14900	0.565586	6.40472e-18
AT4G20310	0.56561	0.000127582
AT1G60989	0.56581	0.000103959
AT2G42570	0.565864	1.83502e-11
AT2G21530	0.566183	1.90183e-07
AT1G28440	0.566206	4.14666e-16
AT4G11290	0.566238	2.98443e-10
AT2G01918	0.566255	0.00154864
AT3G12040	0.566341	0.00611884
AT5G17490	0.566383	0.000160188
AT2G19170	0.566383	0.000430001
AT5G65910	0.566517	5.58294e-09
AT3G17660	0.566656	0.0068057
AT1G14760	0.566663	0.00851244
AT5G37680	0.566668	0.00162822
AT3G15020	0.566703	9.70849e-06
AT3G20300	0.566851	6.11948e-06
AT5G42690	0.566946	2.55288e-07
AT4G23940	0.567291	5.74314e-05
AT5G57800	0.567348	2.05818e-11
AT3G53380	0.567522	2.64806e-06
AT1G09490	0.567561	1.30378e-06
AT4G38660	0.568093	0.000212154
AT2G35370	0.568324	0.000263592
AT5G37180	0.568639	0.00574011
AT5G18860	0.568664	8.94399e-15
AT1G77680	0.569113	2.97335e-14
AT4G30500	0.569289	1.05989e-06
AT5G44440	0.569306	5.32098e-11
AT2G39830	0.569326	0.000418723
AT4G34420	0.569707	0.00286108
AT5G50000	0.570149	2.06143e-15
AT5G50350	0.570479	2.57277e-09
AT3G20670	0.570594	5.87049e-09
AT5G09760	0.570708	2.20655e-05
AT2G32340	0.570736	0.000673807
AT2G27960	0.570895	1.43478e-10
AT1G60860	0.57139	7.05197e-08
AT4G12700	0.57156	0.00361926
AT1G55840	0.571858	5.94305e-16
AT2G44450	0.571973	6.859e-07
AT4G17740	0.572317	2.3858e-07
AT3G15354	0.572425	4.14291e-09
AT5G23760	0.572703	8.66531e-08
AT1G21560	0.572703	5.43398e-06
AT4G15960	0.572809	3.20234e-05
AT4G25830	0.572907	3.6745e-14
AT4G23590	0.5734	0.00461051
AT5G02280	0.573835	0.000423635
AT3G63210	0.573841	2.98355e-12
AT3G14060	0.573963	0.000979454
AT5G46570	0.574181	1.61938e-05
AT5G20110	0.57443	2.20572e-07
AT5G65740	0.574525	2.52574e-06
AT1G03110	0.574662	0.000233536
AT3G54910	0.574701	6.44362e-05
AT3G55950	0.57474	3.76844e-07
AT4G26540	0.575419	1.04455e-13
AT5G06410	0.575472	0.00235283
AT1G58270	0.575599	0.000140782
AT2G24220	0.576107	0.00029918
AT3G09780	0.576249	6.58797e-06
AT1G63310	0.577118	0.00152454
AT5G52420	0.577416	0.000290188
AT1G16390	0.577657	5.14039e-14
AT4G14740	0.577714	7.34808e-09
AT1G66230	0.577901	0.000349459
AT3G48390	0.578028	1.73829e-12
AT5G02120	0.578097	0.000101425
AT2G46690	0.578317	3.84882e-10
AT5G35170	0.578569	9.06619e-12
AT2G19930	0.578614	8.5608e-05
AT1G80000	0.578693	1.75663e-05
AT5G63530	0.578773	1.48361e-07
AT4G20880	0.578783	1.33471e-10
AT3G12977	0.57902	2.56567e-06
AT4G08150	0.579066	2.56282e-12
AT3G57830	0.579269	0.000672842
AT5G56220	0.579443	7.93354e-09
AT4G36180	0.579509	4.86632e-05
AT5G19380	0.579541	0.000816858
AT2G18300	0.579879	4.38734e-15
AT3G48200	0.579897	5.26795e-12
AT5G55550	0.580472	9.90453e-10
AT2G28330	0.580645	0.00225211
AT4G18280	0.581108	2.08484e-08
AT2G26270	0.581126	0.00793501
AT2G18980	0.581236	3.31016e-09
AT3G20015	0.581448	4.07547e-05
AT3G59400	0.581869	1.63156e-12
AT5G15050	0.582106	0.000182868
AT2G39130	0.582317	9.14666e-06
AT3G21700	0.582395	0.00730613
AT1G72810	0.582439	4.79202e-07
AT3G18780	0.582458	6.35981e-19
AT2G27140	0.583023	0.00988104
AT5G38110	0.583138	0.000414208
AT5G16600	0.583393	0.000338547
AT5G01700	0.583481	0.000231084
AT5G36890	0.583496	0.000598488
AT5G04620	0.583587	0.00671485
AT3G19080	0.583938	0.00154052
AT4G02100	0.584105	4.65725e-09
AT3G08940	0.584191	2.87254e-17
AT4G33740	0.584214	2.83863e-14
AT1G63840	0.584324	1.63607e-10
AT3G61380	0.584385	0.000483212
AT1G73370	0.585296	0.000146369
[truncated: 2,727 more rows]
