# Supplementary material for: Cell elongation is regulated through a central circuit of interacting transcription factors in the Arabidopsis hypocotyl
Source: eLife. 2014 May 27;3:e03031. doi: 10.7554/eLife.03031 (PMC4075450; doi:10.7554/eLife.03031)
Supplement: Supplementary file 1. — Primer list for qRT-PCR, ChIP-PCR and DNA pull-down assays. DOI: http://dx.doi.org/10.7554/eLife.03031.023 [file elife03031s005.xlsx]

## Sheet: Sheet1
Supplementary file 1. Primer list for qRT-PCR, ChIP-PCR and DNA pull-down assays
qRT-PCR
Gene	Forward	Reverse
PP2A	TATCGGATGACGATTCTTCGTGCAG	GCTTGGTCGACTATCGGAATGAGAG
SAUR15	AAGAGGATTCATGGCGGTCTATG	GTATTGTTAAGCCGCCCATTGG
SAUR16	AAATCTCGGGTTTTAGTTCGTCA	TGCAAGCCACCACTTATCAGC
SAUR19	ACGTCGTCTCAAGCAGCATCTATCA	CCCACGTAAACCGGAAAATGACCTT
IAA19	GGTGACAACTGCGAATACGTTACCA	CCCGGTAGCATCCGATCTTTTCA
ACS5	GCGATGCTTTCCTTTTGCCTACTC	TTTCTGGGCTTGTTGGTAAGCTTGT
PRE1	GTTCTGATAAGGCATCAGCCTCG	CATGAGTAGGCTTCTAATAACGG
PRE5	AACGGCGTCGTTCTGATAAG	CATGAGTAAGCTTCTAATCACGG
PRE6	TCCAACACCTCATCCCTGAACTTCG	CGGTCACTGAGGTCATCAACCTCTC
CPD	TTGCTCAACTCAAGGAAGAG	TGATGTTAGCCACTCGTAGC
DWF4	GGTGATCTCAGCCGTACATTTGGA	CCCCACGTCGAAAAACTACCACTTC
At4g13790	TCATTCGCCGGTCTTTTACTACGG	AAAGCTTGGAAAGATGGCTTGTTCA
IBH1	CCGCGTGAGGAAGATCAAGA	GCAAGAGGGCTCTGCTCCAT
ChIP-PCR
Gene	Forward	Reverse
PP2A	CGGCTTTCATGATTCCCTCT	GCCTTAAGCTCCGTTTCCTACTT
UBC30	CAAATCCAAAACCCTAGAAACCGAA	AACGACGAAGATCAAGAACTGGGAA
SAUR15	CAAATCATGTGGTCCTGTCTT	TGTCTCAAAGACATCACATGCC
IAA19	GTCTCCCCACACAAACTGAATAAC	CGTCGTGCTTTTTATATGTTGCTT
At1g29500	CACATGATCATGTCTTCTCAGTCC	CCTGACACATCACATGCTTATG
At4g34760	TGTCTGTACATATTTGTGTAGGTAACG	TGTCACAAAGAGGACCAACAATG
DNA pulldown assays
	Forward	Reverse
IAA19 promoter	(biotin)-TATGGAACTTAATCTCTTTATGTGGTTG	CGTCGTGCTTTTTATATGTTGCTT
